# Supplementary material for: Gene Fitness Landscapes of Vibrio cholerae at Important Stages of Its Life Cycle
Source: PLoS Pathog. 2013 Dec 26;9(12):e1003800. doi: 10.1371/journal.ppat.1003800 (PMC3873450; doi:10.1371/journal.ppat.1003800)
Supplement: Table S2 — Table of fitness values for all genes in the V. cholerae genome. (XLS) [file ppat.1003800.s002.xls]

## Sheet: Sheet1
Table S2: Table of fitness values for all genes in the V. cholerae genome
Mean-(Condition)		Average fitness of a gene in a specific condition
sd-(Condition)		Standard deviation of gene fitness in a specific condition
sem-(Condition)		Standard error of the mean of a gene in a specific condition
Total-(condition)		Number of insertion sites from which fitness is calculated
Essentiality		Genes are listed as putatively Essential if the gene had a fitness of zero in LB or has <2 insertion sites and the gene size is >350bp.
Note: The fitness value for any gene with <5 insertion sites was not determined (ND)
Significance		Fitness values determined to be significantly different than 1.0 (using a one-sample student's t-test with Bonferroni correction) are shaded in Green for each condition.
LB		Growth in Luria Bertani broth
LB-B		Growth in Luria Bertani broth after being prepared for host infection (acid-tolerization and resuspension in Bicarbonate buffer)
CF		Cecal fluid of infant rabbit after 12hr infection
SI		Small intestine of infant rabbit after 12h infection
Pond		LB grown stationary phase bacteria put into Pond water for 48h at 30˚C
HP		Host passaged bacteria from Cecal fluid put into Pond for 48h at 30˚C
Locus	Gene	mean-LB	sd-LB	se-LB	Total-LB	mean-LB-B	sd-LB-B	se-LB-B	Total-LB-B	mean-CF	sd-CF	se-CF	Total-CF	mean-SI	sd-SI	se-SI	Total-SI	mean-Pond	sd-Pond	se-Pond	Total-Pond	mean-HP	sd-HP	se-HP	Total-HP	ProteinID	Essentiality
VC0001		0.95136	0.0899596	0.0402312	5	0.945673	0.212382	0.0867045	6	0.987666	0.0633539	0.0182887	12	1.03738	0.0906008	0.0273172	11	1.02827	0.118868	0.0449278	7	1.01652	0.139794	0.040355	12	hypothetical protein
VC0002		0.573227	0.375173	0.0782289	23	0.397563	0.412257	0.0779092	28	0.480445	0.411584	0.0877499	22	0.636263	0.489745	0.106871	21	0.36885	0.513765	0.109535	22	0.578724	0.44072	0.127225	12	flavodoxin
VC0003	trmE	0.470744	0.429521	0.0613601	49	0.467369	0.438531	0.0516814	72	0.0444089	0.139872	0.0229949	37	0	X	X	35	0.0699103	0.244662	0.0396894	38	ND				tRNA modification GTPase TrmE
VC0004		ND				ND				ND				ND				ND				ND				putative inner membrane protein translocase component YidC	Essential
VC0005		ND			3	ND			4	ND				ND			1	ND			3	ND			2	hypothetical protein
VC0006	rnpA	ND				ND				ND				ND				ND				ND				ribonuclease P	Essential
VC0007	rpmH	ND				ND				ND				ND				ND				ND				50S ribosomal protein L34	Essential
VC0008		0.930132	0.231208	0.0344665	45	0.93964	0.140497	0.0177009	63	0.917228	0.249204	0.0371492	46	0.97881	0.151097	0.0207547	53	0.902894	0.309025	0.0356831	76	0.993405	0.290378	0.0368781	62	amino acid ABC transporter, ATP-binding protein
VC0009		0.970132	0.0832594	0.00961397	75	0.908359	0.168228	0.0178321	89	0.938348	0.172776	0.0180132	93	0.954586	0.184797	0.0190603	95	1.04426	0.164209	0.0146289	128	0.990533	0.256513	0.0246829	108	amino acid ABC transproter, permease protein
VC0010		0.933032	0.133891	0.0187485	51	0.9165	0.146082	0.0187038	61	0.961584	0.115906	0.0149634	60	0.936952	0.239	0.0313822	58	0.995626	0.27244	0.031251	76	1.0458	0.193591	0.0231386	71	amino acid ABC transporter, periplasmic amino acid-binding portion
VC0011		ND			3	ND			4	ND				ND			1	ND			3	ND			2	hypothetical protein
VC0012	dnaA	ND				ND				ND				ND				ND				ND				chromosomal replication initiation protein	Essential
VC0013		ND				ND				ND				ND				ND				ND				DNA polymerase III subunit beta	Essential
VC0014	recF	0.871905	0.135938	0.0223481	37	0.836501	0.169953	0.024035	50	0.346803	0.405246	0.0567458	52	0.382823	0.437424	0.0574365	58	0.74276	0.421896	0.0507903	72	0.489626	0.494901	0.149218	11	recombination protein F
VC0015	gyrB	ND				ND				ND				ND				ND				ND				DNA gyrase subunit B	Essential
VC0016		0.959483	0.107758	0.022469	23	0.904976	0.162404	0.0301577	29	0.949992	0.0990942	0.0198188	25	0.966836	0.118984	0.0228984	27	1.05317	0.127404	0.0215353	35	0.93332	0.360424	0.0577141	39	hypothetical protein
VC0017		ND			2	ND			4	ND			2	ND			3	1.02271	0.116315	0.0474855	6	0.863696	0.356948	0.159632	5	hypothetical protein
VC0018		0.947587	0.0676681	0.0174718	15	0.945835	0.176641	0.0456084	15	0.949353	0.0708115	0.0150971	22	0.961831	0.0835989	0.0197044	18	0.927725	0.219798	0.0567516	15	1.00238	0.175149	0.0350297	25	16 kDa heat shock protein A
VC0019	avtA	0.924666	0.153326	0.024243	40	0.915159	0.122794	0.0158526	60	0.963878	0.127511	0.0215533	36	0.985069	0.0865574	0.0126257	47	0.977933	0.251303	0.0302533	69	0.944104	0.345432	0.0474487	53	valine--pyruvate transaminase
VC0020	glyS	ND				ND				ND				ND				ND				ND				glycyl-tRNA synthetase subunit beta	Essential
VC0021	glyQ	ND				ND				ND				ND				ND				ND				glycyl-tRNA synthetase subunit alpha	Essential
VC0022		0.933139	0.197839	0.0528748	14	0.869442	0.285832	0.0693245	17	0.812218	0.313324	0.078331	16	0.874	0.265236	0.0684837	15	0.704605	0.422518	0.10563	16	0.996977	0.41099	0.0996797	17	hypothetical protein
VC0023		0.964844	0.112792	0.0281981	16	0.937371	0.183373	0.0420687	19	0.88294	0.259326	0.0579872	20	0.915195	0.240401	0.0537552	20	0.968432	0.266482	0.0522615	26	0.948541	0.357608	0.0745665	23	NADH dehydrogenase subunit II-related protein
VC0024		ND				ND				ND				ND				ND				ND				cell developmental protein SirA	Essential
VC0025		0.962437	0.0689356	0.0146971	22	0.919083	0.106088	0.019054	31	0.885211	0.328334	0.077389	18	0.967087	0.101508	0.0211658	23	1.02473	0.216586	0.0346815	39	0.938453	0.356868	0.0674416	28	hypothetical protein
VC0026		0.884095	0.279497	0.0292992	91	0.910584	0.174537	0.0157375	123	0.896169	0.28672	0.0312837	86	0.97963	0.136984	0.0136984	101	0.856664	0.353341	0.0298628	146	0.937307	0.314674	0.030003	110	zinc-binding alcohol dehydrogenase
VC0027		0.924412	0.209462	0.0188866	123	0.895995	0.203583	0.0172059	140	0.935327	0.164068	0.0135321	148	0.945752	0.161663	0.0134253	146	1.02311	0.1706	0.0130844	173	0.921475	0.285298	0.0214443	180	threonine dehydratase
VC0028		0.952208	0.182929	0.0152441	145	0.908196	0.196148	0.01462	181	0.925258	0.177904	0.0157246	131	0.943575	0.175728	0.0146951	145	0.962068	0.275371	0.0194232	208	0.877559	0.359759	0.0294726	151	dihydroxy-acid dehydratase
VC0029		0.946297	0.174254	0.0187903	86	0.945718	0.135143	0.0124409	118	0.907715	0.269591	0.0285766	93	0.946361	0.164555	0.0162933	104	0.945452	0.30634	0.025181	152	0.811697	0.350118	0.0336901	110	branched-chain amino acid aminotransferase
VC0030	ilvM	0.967294	0.0865512	0.0193534	20	0.971219	0.16861	0.0318642	28	0.989333	0.120658	0.0269799	20	0.979758	0.165236	0.0330471	25	0.968772	0.257652	0.0397566	42	1.01257	0.352922	0.066696	28	acetolactate synthase 2 regulatory subunit
VC0031		0.926788	0.218442	0.0177766	152	0.904423	0.214455	0.0160741	179	0.90955	0.211271	0.0162999	169	0.906279	0.254273	0.0195595	172	1.02034	0.231359	0.0162382	211	0.964308	0.269679	0.0197209	191	acetolactate synthase 2 catalytic subunit
VC0032		0.932404	0.205086	0.0173952	141	0.921016	0.135391	0.00974566	194	0.963675	0.180778	0.0149103	151	0.969929	0.210426	0.0162347	172	1.00763	0.229109	0.0152401	235	0.994199	0.281287	0.0203532	194	ComM-related protein
VC0033		0.948299	0.164895	0.0209417	62	0.900786	0.224958	0.025976	75	0.969811	0.160436	0.0200546	64	0.963661	0.201105	0.0243876	68	1.00084	0.223346	0.023413	91	0.982545	0.201253	0.0223615	81	hypothetical protein
VC0034		0.84062	0.199325	0.0390908	26	0.877043	0.237069	0.0425788	31	0.0595761	0.172223	0.031981	29	0.0276355	0.140813	0.0252908	31	0.65575	0.492306	0.0788321	39	ND			1	thiol:disulfide interchange protein
VC0035		0.937985	0.248201	0.0358248	48	0.873311	0.246446	0.0310493	63	0.946293	0.236183	0.0330722	52	0.970036	0.162765	0.0213721	58	1.01621	0.24583	0.0295945	69	0.893431	0.329317	0.0436191	57	serine/threonine protein kinase
VC0036		0.858748	0.233094	0.0254326	84	0.769503	0.299432	0.0307211	95	0.748888	0.309202	0.0287087	117	0.643252	0.402501	0.0382037	112	0.718827	0.438786	0.0414614	116	0.838122	0.381275	0.040877	88	FixG-related protein
VC0037		0.856964	0.24483	0.0738192	11	0.937362	0.0700936	0.0175234	16	0.745692	0.383039	0.135425	8	0.899011	0.312854	0.0943291	11	0.848789	0.499706	0.121196	17	0.994195	0.151595	0.0618883	6	hypothetical protein
VC0038		0.92878	0.149332	0.0472228	10	0.855551	0.205207	0.0569141	13	0.82768	0.375781	0.108479	12	0.976206	0.123174	0.0355572	12	1.06526	0.326613	0.0816533	16	0.793966	0.349403	0.096907	13	hypothetical protein
VC0039		0.942517	0.0884261	0.0128983	47	0.911047	0.154374	0.0218318	50	0.929225	0.214786	0.0262403	67	0.909934	0.246485	0.031821	61	1.03905	0.22433	0.027204	68	0.958025	0.257147	0.0289313	80	SpoOM-related protein
VC0040		0.899509	0.228156	0.0385654	35	0.885595	0.208018	0.0317225	43	0.923017	0.248123	0.0382862	42	0.964476	0.251492	0.0366839	47	0.929558	0.35428	0.0469256	57	0.961853	0.318483	0.0441657	52	hemolysin, putative
VC0041		0.932601	0.177703	0.0205194	75	0.910607	0.222658	0.0221553	101	0.905446	0.242385	0.0318268	59	0.922177	0.257171	0.0305206	71	0.928029	0.317978	0.0304568	113	0.861976	0.37257	0.0427368	76	hypothetical protein
VC0042		0.855438	0.242567	0.026006	87	0.8845	0.207046	0.019741	110	0.909239	0.274429	0.0286112	94	0.989728	0.199288	0.0197325	103	0.765121	0.412587	0.0361863	135	0.679047	0.415914	0.0428982	94	potassium uptake protein TrkH
VC0043	trkA	ND				ND				ND				ND				ND				ND				potassium transporter peripheral membrane component	Essential
VC0044		0.885435	0.24597	0.0255059	93	0.875743	0.217586	0.02029	115	0.935619	0.162537	0.015862	107	0.936971	0.208328	0.0202346	107	1.03772	0.211966	0.0181095	140	0.869973	0.321482	0.0295948	118	sun protein
VC0045	fmt	ND			4	ND			2	0.771025	0.368232	0.15033	6	0.916143	0.12085	0.054046	5	ND			4	0.865158	0.256728	0.0970342	7	methionyl-tRNA formyltransferase
VC0046	def	0.730236	0.37084	0.107052	12	0.610825	0.435328	0.105583	17	0.792146	0.311817	0.0940165	11	0.587965	0.469955	0.135664	12	0.857032	0.317579	0.0957536	11	0.708353	0.294972	0.111489	7	peptide deformylase
VC0047		0.970762	0.119872	0.00953652	159	0.921724	0.168519	0.0119161	201	0.958384	0.11471	0.00898477	168	0.976187	0.124526	0.00930752	181	1.00644	0.246357	0.015969	246	0.969868	0.29121	0.0197687	220	hypothetical protein
VC0048		0.945638	0.171247	0.0146306	138	0.908073	0.196078	0.0152647	166	0.943673	0.183809	0.0142664	167	0.969099	0.162849	0.0128743	162	1.01751	0.200284	0.0146856	193	0.999577	0.232803	0.0166288	199	smf protein
VC0049		0.934122	0.10054	0.0180574	31	0.890347	0.224106	0.0409161	30	0.869462	0.251608	0.0370976	46	0.95533	0.235845	0.0363917	42	0.881153	0.361719	0.0558144	42	0.90445	0.378067	0.0534667	50	hypothetical protein
VC0050		0.920438	0.15897	0.0206962	59	0.920549	0.109602	0.0125722	76	0.919733	0.202519	0.0233848	76	0.942489	0.189239	0.0215658	78	1.03042	0.184194	0.0189982	96	0.925338	0.362346	0.0402607	82	DNA topoisomerase I-related protein
VC0051		0.92881	0.207983	0.0210095	98	0.939017	0.214533	0.0195841	120	0.537918	0.38516	0.0367236	112	0.415882	0.413609	0.038738	116	0.915309	0.352341	0.0298851	144	0.775666	0.404166	0.0655644	38	phosphoribosylaminoimidazole carboxylase ATPase subunit
VC0052		0.814055	0.348133	0.0530898	43	0.908915	0.138879	0.0187265	55	0.160959	0.300946	0.0501576	36	0.16114	0.294512	0.0443994	44	0.835514	0.435755	0.0577172	57	ND			4	phosphoribosylaminoimidazole carboxylase catalytic subunit
VC0053		ND			1	ND			1	ND			4	0	X	X	5	ND			2	ND				hypothetical protein
VC0054		0.884111	0.273339	0.039453	48	0.871217	0.249578	0.0319552	61	0.922443	0.143436	0.0218738	43	0.904007	0.262236	0.0356858	54	0.939818	0.352753	0.0437536	65	0.927085	0.385203	0.0561876	47	Sua5/YciO/YrdC family protein
VC0055		ND			1	ND			1	ND				ND				ND				ND			1	coproporphyrinogen III oxidase	Essential
VC0056	aroE	0.857768	0.219237	0.0212942	107	0.855644	0.250265	0.0217828	132	0.344874	0.370775	0.0294972	163	0.268328	0.385284	0.030749	161	0.614305	0.42304	0.0317977	185	0.384544	0.468918	0.107577	19	shikimate 5-dehydrogenase
VC0057		0.958205	0.124754	0.0278959	20	0.927799	0.12294	0.0241105	26	0.869985	0.335065	0.0837663	16	0.960809	0.125857	0.0296647	18	0.990876	0.301428	0.0580099	27	0.990986	0.224774	0.0490497	21	hypothetical protein
VC0058		0.93873	0.231161	0.0282409	67	0.884653	0.259566	0.028491	83	0.948995	0.138381	0.0161963	74	0.954033	0.147205	0.0166677	78	0.981822	0.26464	0.0257041	106	0.964834	0.282315	0.0295947	91	carbonic anhydrase
VC0059		ND				ND				ND				ND				ND				ND				hypothetical protein	Essential
VC0060	ccrB	0.943672	0.0905148	0.0320018	8	0.915096	0.102845	0.0325226	10	0.982012	0.0585893	0.0195298	9	1.00637	0.0494629	0.0149136	11	1.06987	0.0864423	0.0273355	10	1.00653	0.283763	0.0709409	16	camphor resistance protein CrcB
VC0061		0.898164	0.236949	0.0268292	78	0.937401	0.130765	0.0137079	91	0.889818	0.224228	0.0235055	92	0.920967	0.197093	0.020661	91	0.986677	0.257259	0.0243087	112	0.944102	0.302118	0.0300619	102	thiamine biosynthesis protein ThiC
VC0062	thiE	0.983431	0.148854	0.0171882	75	0.953055	0.145224	0.0148218	96	0.875958	0.196777	0.0204048	95	0.941083	0.16958	0.0173986	95	1.02313	0.227959	0.0202281	128	0.963338	0.310709	0.0317116	97	thiamine-phosphate pyrophosphorylase
VC0063		0.919719	0.250216	0.0361156	48	0.928756	0.260678	0.0376257	48	0.846227	0.259069	0.0309647	70	0.910852	0.183194	0.0227224	65	1.02911	0.233514	0.031487	55	0.930719	0.319156	0.0363712	78	thiF protein
VC0064		0.92374	0.225279	0.0563198	16	0.836751	0.430104	0.0961742	20	0.867298	0.190012	0.0490608	15	0.949626	0.0740059	0.0191082	15	1.00535	0.237354	0.0544528	19	1.06362	0.122064	0.0260242	22	sulfur carrier protein ThiS
VC0065	thiG	0.985782	0.0932747	0.0143926	42	0.878934	0.218808	0.0337627	42	0.843458	0.266816	0.040224	44	0.880703	0.254101	0.0370645	47	0.967654	0.368039	0.0525769	49	0.94378	0.361359	0.0551067	43	thiazole synthase
VC0066	thiH	0.95272	0.188515	0.0261423	52	0.933863	0.225495	0.0284096	63	0.812858	0.281231	0.0372499	58	0.873188	0.259123	0.0326464	63	0.953977	0.26358	0.0310632	72	0.919275	0.323082	0.0424228	58	thiamine biosynthesis protein ThiH
VC0067		0.909931	0.215283	0.0179403	144	0.898001	0.189421	0.0141977	178	0.92548	0.197879	0.0148316	180	0.970397	0.126426	0.00929501	186	0.797086	0.397496	0.0274299	221	0.961644	0.303092	0.0211174	209	aminopeptidase P
VC0068		0.961398	0.133851	0.0137328	95	0.926051	0.188758	0.0188758	100	0.972924	0.139045	0.0144183	94	0.965241	0.113003	0.0117814	92	1.01013	0.248119	0.0225563	122	0.964819	0.295714	0.0269949	121	LysR family transcriptional regulator
VC0069		0.91748	0.172035	0.0174675	97	0.920733	0.16208	0.015114	115	0.923335	0.189152	0.0208884	83	0.941734	0.198544	0.0208131	92	1.02711	0.172586	0.0148538	139	1.01139	0.262125	0.025223	109	multidrug resistance protein, putative
VC0070		0.731757	0.303766	0.114813	7	0.919709	0.100813	0.0291021	12	ND			3	1.00877	0.248177	0.0938021	7	0.548556	0.437218	0.112889	15	ND			4	hypothetical protein
VC0071		0.905205	0.299931	0.0588212	26	0.912313	0.233975	0.0379557	38	0.863454	0.31206	0.0665313	22	0.970214	0.200719	0.0372725	29	0.86103	0.386065	0.0588743	43	1.11143	0.258639	0.0472208	30	DNA-binding transcriptional regulator AsnC
VC0072		0.947533	0.160898	0.0113208	203	0.920925	0.174008	0.0110495	249	0.95765	0.142007	0.00973016	217	0.996032	0.103543	0.0068274	235	1.03319	0.170237	0.00968443	318	0.960073	0.272347	0.0164832	280	sensory box/GGDEF family protein
VC0073		0.937715	0.155616	0.0182135	73	0.911361	0.203502	0.0204527	99	0.821981	0.339217	0.0402576	72	0.909135	0.258097	0.0279946	85	1.01868	0.20711	0.0195701	116	0.886205	0.357077	0.0396752	81	hypothetical protein
VC0074		ND			4	ND			2	ND			4	ND			2	ND			2	ND			3	hypothetical protein
VC0075		0.951027	0.161143	0.0182458	78	0.917801	0.206778	0.0231185	80	0.917173	0.220567	0.0227497	94	0.933324	0.242905	0.0253246	92	1.00695	0.218515	0.0232938	88	0.979651	0.288739	0.0276562	112	MadN protein
VC0076		0.99165	0.0956776	0.0174683	30	0.954027	0.0734872	0.0116194	40	0.941277	0.263675	0.0538224	24	0.928806	0.252265	0.0468444	29	0.973033	0.252622	0.0380842	44	0.762944	0.435473	0.0822967	28	universal stress protein A
VC0077		0.950981	0.0940995	0.0271642	12	0.976319	0.0780764	0.0189363	17	0.822858	0.319371	0.112915	8	0.87006	0.291788	0.0879774	11	0.967179	0.259049	0.0579252	20	0.848262	0.32796	0.0988836	11	hypothetical protein
VC0078		0.894932	0.203141	0.0325286	39	0.887549	0.236143	0.0337347	49	0.948646	0.191254	0.0298688	41	0.940904	0.220396	0.0328547	45	1.08837	0.186422	0.0246922	57	0.968626	0.322142	0.0455577	50	ferritin
VC0079		0.977684	0.0499145	0.0203775	6	0.957998	0.0696535	0.0232178	9	0.900317	0.373332	0.141106	7	1.03322	0.0708819	0.0236273	9	1.11754	0.103018	0.0310611	11	1.01475	0.116966	0.0389888	9	universal stress protein UspB
VC0080		0.956289	0.14547	0.0144037	102	0.90618	0.196696	0.0179558	120	0.953799	0.178106	0.0163959	120	0.948987	0.192031	0.0177532	118	1.02359	0.23064	0.0191536	147	0.928009	0.330005	0.0279907	140	hypothetical protein
VC0081		0.899226	0.261738	0.0327172	64	0.899917	0.187551	0.0204635	84	0.92828	0.195165	0.0230004	72	0.975053	0.156566	0.0177276	78	0.962684	0.293536	0.0286462	108	0.92441	0.334836	0.0351003	92	hypothetical protein
VC0082		0.908335	0.17347	0.0174344	99	0.913583	0.177159	0.0165201	115	0.917924	0.175067	0.0149027	139	0.922069	0.241453	0.020334	141	1.01451	0.226604	0.0187538	149	0.964061	0.321354	0.0259799	157	hypothetical protein
VC0083	ubiE	ND				ND				ND				ND				ND				ND				ubiquinone/menaquinone biosynthesis methyltransferase	Essential
VC0084		ND				ND				ND				ND				ND				ND				hypothetical protein	Essential
VC0085	ubiB	ND				ND				ND				ND				ND				ND				putative ubiquinone biosynthesis protein UbiB	Essential
VC0086	tatA	0.815565	0.296464	0.0501116	35	0.790694	0.309799	0.0456774	46	0.675806	0.317522	0.0484217	43	0.413569	0.435605	0.0649362	45	0.0503182	0.143808	0.0212033	46	0.581787	0.541578	0.112927	23	twin argininte translocase protein A
VC0087		0.822315	0.267378	0.0690368	15	0.629511	0.474002	0.103436	21	0.358921	0.38404	0.115792	11	0.367648	0.440904	0.117837	14	0.120664	0.330791	0.0779683	18	0	X	X	6	sec-independent translocase
VC0088		0.752566	0.29211	0.0508499	33	0.558951	0.466135	0.0746413	39	0.512168	0.413385	0.06706	38	0.400442	0.39621	0.0651366	37	0.148479	0.263825	0.042798	38	0.607229	0.462488	0.115622	16	hypothetical protein
VC0089		0.932615	0.194173	0.0271896	51	0.902854	0.174754	0.022017	63	0.929711	0.209511	0.029054	53	1.00098	0.0835478	0.0114762	53	0.975957	0.269525	0.0295842	83	0.940698	0.365235	0.0442913	68	cytochrome c551 peroxidase
VC0090		0.928164	0.196091	0.026441	55	0.889166	0.196216	0.0231243	72	0.954969	0.195076	0.0265465	55	0.971372	0.189577	0.0233354	66	0.999786	0.246759	0.025317	95	0.922124	0.367421	0.03962	86	DNA-damage-inducible protein F
VC0091		0.927767	0.253505	0.0395908	41	0.912402	0.210345	0.0297473	50	0.943437	0.146541	0.0203215	52	0.952025	0.189616	0.0255678	55	1.04163	0.194216	0.0248668	61	0.948755	0.295078	0.0357835	68	O-methyltransferase-related protein
VC0092		ND			1	ND			1	ND				ND			1	ND			2	ND				LexA repressor	Essential
VC0093		0.935142	0.201025	0.0163053	153	0.876369	0.227593	0.016555	190	0.790179	0.327335	0.0289326	131	0.603733	0.417087	0.0337195	156	0.559297	0.499566	0.0353246	211	0.6791	0.45236	0.0399833	129	glycerol-3-phosphate acyltransferase
VC0094	ubiA	ND			3	0	X	X	5	ND			1	ND			1	ND			2	ND				4-hydroxybenzoate octaprenyltransferase	Essential
VC0095		0.81811	0.246487	0.0399854	38	0.673131	0.31596	0.0493447	41	0.909667	0.222985	0.0303444	54	0.8559	0.255034	0.0364334	49	0.965111	0.480458	0.0716224	45	0.813811	0.334818	0.0418522	64	chorismate--pyruvate lyase
VC0096		ND				ND				ND				ND				ND				ND				hypothetical protein	Essential
VC0097		0.794427	0.34379	0.0992436	12	0.903571	0.160794	0.0429741	14	0.930437	0.273848	0.0759517	13	0.968133	0.0873448	0.0252143	12	0.998437	0.284482	0.0711205	16	0.885607	0.386295	0.0997409	15	flagellar basal body-associated protein FliL-like protein
VC0098		0.949394	0.168158	0.0160332	110	0.902906	0.198636	0.0168481	139	0.941218	0.205556	0.020254	105	0.945632	0.202357	0.0187884	116	1.03279	0.22662	0.0179722	162	0.97181	0.299003	0.0260248	133	methyl-accepting chemotaxis protein
VC0099		0.96626	0.126797	0.0124937	103	0.935215	0.16742	0.01522	121	0.973008	0.12319	0.0113406	119	0.97125	0.177092	0.0159679	123	1.00385	0.215687	0.0171051	163	1.00289	0.271025	0.0227439	144	glpG protein
VC0100	glpE	0.929398	0.206269	0.0353748	34	0.943935	0.119673	0.0180415	44	0.936066	0.124552	0.0254241	24	0.948112	0.173246	0.0306258	32	0.894467	0.31376	0.0462614	46	0.926135	0.25928	0.0444662	34	thiosulfate sulfurtransferase
VC0101		ND			4	ND			2	0.953098	0.0505396	0.0145895	12	0.957187	0.0833404	0.0263546	10	ND			4	1.06477	0.105626	0.0272726	15	hypothetical protein
VC0102		ND				ND				ND				ND				ND				ND				hypothetical protein	Essential
VC0103		0.947714	0.102193	0.0155843	43	0.928297	0.105308	0.0139483	57	0.923148	0.255287	0.0414131	39	0.949974	0.210201	0.029434	51	0.963476	0.312991	0.0394331	63	0.950914	0.291053	0.0420099	48	hypothetical protein
VC0104		0.676811	0.352454	0.157622	5	0.709811	0.307167	0.102389	9	0.506298	0.5052	0.206247	6	0.894256	0.17574	0.0717457	6	0.920399	0.342277	0.121013	8	ND			3	hypothetical protein
VC0105		ND				ND				ND				ND				ND				ND				delta-aminolevulinic acid dehydratase	Essential
VC0106		0.901469	0.254266	0.0554855	21	0.864602	0.234591	0.0443334	28	0.989535	0.109798	0.0219595	25	0.997966	0.162556	0.0312839	27	0.935602	0.344449	0.0599609	33	0.98881	0.249129	0.047081	28	hypothetical protein
VC0107		ND			3	ND			4	ND				ND			1	ND			3	ND			2	hypothetical protein
VC0108		0.0584096	0.153249	0.0484615	10	0.098519	0.261943	0.0654857	16	ND			4	0	X	X	6	ND				ND				DNA polymerase I
VC0109		ND				ND				ND				ND				ND				ND				hypothetical protein	Essential
VC0110		ND			1	ND			1	ND			4	ND			4	ND			2	0.98366	0.121655	0.0544058	5	hypothetical protein
VC0111		0.866411	0.11813	0.0482265	6	0.892425	0.103558	0.0366134	8	ND				ND			2	ND			4	ND			1	GTPase EngB
VC0112		0.92621	0.212781	0.0297953	51	0.807853	0.257047	0.0300851	73	0.634468	0.381501	0.0588668	43	0.608901	0.415602	0.0570873	53	0.258211	0.409274	0.046947	76	0.496264	0.500464	0.10921	21	cytochrome c4
VC0113		0.890069	0.241037	0.0351588	47	0.882756	0.228996	0.0303313	57	0.916922	0.220237	0.032831	45	0.894968	0.264163	0.0381286	48	0.933746	0.33385	0.041409	65	0.959179	0.333918	0.0458672	53	methyltransferase-related protein
VC0114		0.8978	0.114285	0.022857	25	0.900584	0.177322	0.0308677	33	0.809017	0.280837	0.0481632	34	0.845169	0.284647	0.0461758	38	0.895062	0.366364	0.0546143	45	0.927897	0.284781	0.0474634	36	hypothetical protein
VC0115		0.956179	0.144631	0.0301576	23	0.879746	0.231023	0.0428999	29	0.928982	0.110244	0.0259847	18	0.953748	0.150542	0.0313901	23	1.01274	0.231975	0.0416639	31	1.05593	0.250068	0.0428863	34	hypothetical protein
VC0116		0.886154	0.21599	0.0235664	84	0.790351	0.252087	0.0257285	96	0.914511	0.196471	0.0223899	77	0.888417	0.295652	0.0316972	88	0.682708	0.498287	0.0500798	100	0.911195	0.357542	0.0359344	100	coproporphyrinogen III oxidase
VC0117		0.900315	0.231075	0.0265061	76	0.874996	0.251004	0.0247322	103	0.940735	0.177039	0.0210106	72	0.966352	0.194146	0.0208146	87	0.845569	0.367982	0.034771	117	0.829072	0.385942	0.0409098	89	hemY protein
VC0118		0.883455	0.225264	0.0261864	74	0.896135	0.20468	0.021696	89	0.893024	0.222505	0.0247227	82	0.904263	0.197583	0.020827	91	0.887769	0.282657	0.0261317	119	0.760738	0.39722	0.039722	101	uroporphyrin-III C-methyltransferase, putative
VC0119	hemD	ND			4	0.913958	0.0985772	0.0440851	5	0.986112	0.12707	0.0568275	5	1.03197	0.0760804	0.0340242	5	0.697239	0.428241	0.151406	8	0.924529	0.210215	0.0700718	9	uroporphyrinogen-III synthase
VC0120	hemC	0.637964	0.442092	0.133296	11	0.378176	0.437154	0.13824	10	0.724668	0.40739	0.135797	9	0.546987	0.517047	0.172349	9	0.901255	0.417869	0.170594	6	ND			3	porphobilinogen deaminase
VC0121		0.952622	0.10245	0.0362217	8	0.862822	0.140734	0.0531923	7	0.91734	0.147413	0.0347455	18	0.897304	0.233959	0.0584899	16	1.09341	0.0745962	0.0235894	10	1.01454	0.176498	0.0352997	25	hypothetical protein
VC0122	cyaA	0.728824	0.398712	0.0460393	75	0.636883	0.429246	0.0411143	109	0.551555	0.413922	0.0548254	59	0.607024	0.444916	0.0520735	74	0.289287	0.418737	0.0448934	91	0.697353	0.57302	0.0906024	40	adenylate cyclase
VC0123	cyaY	0.324187	0.426542	0.106635	16	0.226213	0.417773	0.0871117	23	0.214569	0.369784	0.111494	11	0.0646389	0.222619	0.0594975	14	0	X	X	7	ND				frataxin-like protein
VC0124		0.564456	0.493984	0.186709	7	0.70954	0.395553	0.131851	9	0.911706	0.0860324	0.0384749	5	0.801845	0.334429	0.126402	7	0.572885	0.486266	0.198517	6	0.970205	0.476853	0.194674	6
VC0125		0.859919	0.257212	0.0278986	85	0.871004	0.218377	0.0213114	105	0.299415	0.350111	0.0340058	108	0.199969	0.347827	0.0334697	109	0.529475	0.475814	0.0438022	122	0.638023	0.431509	0.130105	11	diaminopimelate decarboxylase
VC0126	dapF	ND				ND				ND				ND				ND				ND				diaminopimelate epimerase	Essential
VC0127		0.944698	0.17721	0.0313266	32	0.921986	0.155139	0.0239385	42	0.958835	0.153276	0.0216765	50	0.915209	0.257929	0.0364767	50	0.921751	0.312435	0.0378883	68	0.875845	0.348997	0.0466367	56	hypothetical protein
VC0128	xerC	0.528948	0.388767	0.0506131	59	0.392621	0.39538	0.0479469	68	0.474654	0.411076	0.0612796	45	0.326102	0.437153	0.0630976	48	0.491519	0.497474	0.0776924	41	0.780435	0.395882	0.105804	14	site-specific tyrosine recombinase XerC
VC0129		0.855014	0.273816	0.0399401	47	0.822582	0.279183	0.0351737	63	0.869763	0.311914	0.0406077	60	0.876065	0.322279	0.0390821	68	0.99053	0.253275	0.0292457	76	1.01003	0.27001	0.0327436	68	hypothetical protein
VC0130		0.958425	0.157365	0.0116328	183	0.928679	0.15648	0.010386	228	0.927395	0.169112	0.0122365	195	1.00098	0.145698	0.0100066	215	1.00312	0.229658	0.0137493	289	0.944721	0.370907	0.0244569	235	GGDEF family protein
VC0131		1.01066	0.120719	0.0188531	41	0.928232	0.155002	0.0210931	54	0.981294	0.172804	0.0257601	45	0.992859	0.0809476	0.0116838	48	1.03705	0.179752	0.022126	66	0.94924	0.285477	0.0368549	60	hypothetical protein
VC0132		0.931699	0.188196	0.0188196	100	0.902602	0.217776	0.0198801	120	0.913571	0.213203	0.0204212	111	0.955926	0.163663	0.0154647	112	1.02147	0.220362	0.0190364	138	0.968579	0.284047	0.0238367	144	hypothetical protein
VC0133		ND			4	ND			2	0.936977	0.0715603	0.0253004	8	0.868709	0.272366	0.121806	5	ND			4	1.16274	0.116978	0.047756	6	hypothetical protein
VC0134		0.983989	0.130685	0.0227493	33	0.915821	0.175875	0.0265142	44	0.877958	0.277475	0.0483023	33	0.935981	0.239223	0.0388072	38	0.693264	0.422883	0.0575471	54	0.923169	0.321629	0.0521751	38	hypothetical protein
VC0135		0.932805	0.177889	0.0177006	101	0.936789	0.150965	0.012851	138	0.934409	0.191698	0.0186193	106	0.993699	0.117197	0.0106986	122	0.99351	0.170065	0.0131208	170	0.991316	0.279875	0.0237387	141	lysophospholipase L2
VC0136	rhtB	0.968616	0.145746	0.0214891	46	0.923072	0.149106	0.0199251	56	0.95454	0.150984	0.0217926	48	1.00762	0.071478	0.0101085	50	0.98799	0.286082	0.0349505	67	0.982349	0.242082	0.0295751	67	homoserine/homoserine lactone efflux protein
VC0137		0.939486	0.141716	0.0163639	75	0.887113	0.181893	0.0182809	99	0.929872	0.206144	0.0208237	100	0.97071	0.196481	0.0191746	105	1.02356	0.174944	0.0156475	128	1.04128	0.225752	0.0206082	121	hypothetical protein
VC0138		0.951017	0.167643	0.0432851	15	0.959346	0.0568294	0.0137832	17	0.990248	0.0626117	0.0197996	10	1.00568	0.0760547	0.0253516	9	0.91449	0.30112	0.0835156	13	0.921431	0.157076	0.0419803	14	hypothetical protein
VC0139		0.88901	0.277052	0.0395788	49	0.884996	0.200371	0.0260861	59	0.968717	0.215265	0.0290264	55	0.98354	0.176243	0.0229449	59	0.982329	0.316026	0.0372441	72	1.00448	0.24358	0.0283157	74	DPS family protein
VC0140		0.877263	0.29177	0.130483	5	0.935388	0.1286	0.0454669	8	0.983161	0.105044	0.0371385	8	1.00651	0.0568241	0.0200904	8	0.990295	0.353296	0.106523	11	1.02903	0.119766	0.0378734	10	hypothetical protein
VC0141		ND			3	ND			4	ND				ND			1	ND			2	ND			1	hypothetical protein
VC0142		0.746194	0.385393	0.121872	10	0.896289	0.152968	0.0424258	13	0.77432	0.392077	0.148191	7	1.01422	0.0989821	0.0349954	8	0.576085	0.48183	0.128775	14	0.840826	0.398208	0.140788	8	hypothetical protein
VC0143		ND				ND				ND				ND				ND				ND				hypothetical protein	Essential
VC0144		0.961409	0.147667	0.0269602	30	0.874638	0.240333	0.038	40	0.952072	0.190052	0.0330837	33	0.948675	0.213711	0.0346685	38	0.870781	0.335432	0.0489278	47	0.888458	0.330353	0.0487078	46	hypothetical protein
VC0145		0.928141	0.0563507	0.019923	8	0.940254	0.0502037	0.0167346	9	0.966905	0.183941	0.051016	13	0.952656	0.258402	0.0745942	12	1.06007	0.11276	0.0301364	14	0.950502	0.20927	0.0661771	10	hypothetical protein
VC0146		0.955616	0.222417	0.0387178	33	0.955557	0.167167	0.0257945	42	0.848497	0.224098	0.0373497	36	0.920197	0.145032	0.0238432	37	1.01144	0.188134	0.0274422	47	0.931025	0.381657	0.062744	37	hypothetical protein
VC0147		ND				ND				ND				ND				ND				ND				cell division protein FtsY	Essential
VC0148		0.913764	0.209681	0.0419361	25	0.895881	0.200136	0.0378221	28	0.913774	0.140734	0.0265963	28	0.928444	0.0745844	0.01385	29	0.923902	0.310129	0.0539865	33	0.977381	0.260065	0.0452715	33	cell division ATP-binding protein FtsE
VC0149		0.892763	0.234845	0.0298253	62	0.902769	0.206567	0.0236948	76	0.867382	0.249823	0.0298595	71	0.866009	0.284199	0.0325998	77	0.975057	0.228528	0.0243612	89	0.978688	0.316905	0.0365931	75	cell division protein FtsX
VC0150		ND				ND				ND				ND				ND				ND				RNA polymerase factor sigma-32	Essential
VC0151		0.937259	0.156044	0.0199794	61	0.915988	0.144031	0.0159056	82	0.964198	0.180389	0.0252595	52	0.979095	0.152613	0.0190767	64	0.756259	0.407709	0.0418301	98	0.767422	0.361895	0.0438862	68	soluble pyridine nucleotide transhydrogenase
VC0152		0.97479	0.121821	0.0203034	36	0.944415	0.153961	0.0234788	43	0.873158	0.238739	0.0348236	47	0.879623	0.239988	0.0353844	46	0.996125	0.269265	0.0366424	54	0.924681	0.35296	0.0494243	51	DNA-binding transcriptional repressor FabR
VC0153		0.9809	0.0813531	0.0169633	23	0.96197	0.0696872	0.0134113	27	0.96228	0.0975148	0.0243787	16	0.95129	0.162296	0.0362905	20	0.994649	0.235589	0.0416467	32	1.01046	0.159035	0.0324629	24	hypothetical protein
VC0154		0.958909	0.187245	0.0257201	53	0.942928	0.194589	0.0260031	56	0.924259	0.184735	0.0225689	67	0.942936	0.157817	0.0202064	62	1.01095	0.19735	0.0241101	67	0.958357	0.259593	0.0295833	77	tRNA (uracil-5-)-methyltransferase
VC0156		0.941265	0.152484	0.0156445	95	0.916495	0.177806	0.0155946	130	0.908332	0.246954	0.0260313	93	0.920273	0.232358	0.0225686	108	0.953519	0.260085	0.0204975	168	0.952898	0.314577	0.0293345	115	vitamin B12 receptor
VC0157		0.953759	0.146231	0.0160509	83	0.901998	0.176311	0.0163	117	0.900154	0.25963	0.0264983	98	0.959176	0.170659	0.0166546	106	0.964367	0.29179	0.0247493	142	0.884801	0.340439	0.0304498	126	alkaline serine protease
VC0158		ND				ND				ND				ND				ND				ND				glutamate racemase	Essential
VC0159		0.875208	0.290271	0.0513132	32	0.820414	0.312994	0.0514559	37	0.895888	0.216678	0.0312748	48	0.954849	0.158664	0.0233937	46	0.925033	0.292127	0.0430718	46	0.938369	0.28915	0.0421768	47	RNA-binding protein
VC0160		ND				ND				ND				ND				ND				ND				hypothetical protein	Essential
VC0161		0.976347	0.228561	0.0410507	31	0.986494	0.142369	0.0227974	39	0.923736	0.259346	0.0719295	13	0.939413	0.231179	0.0492876	22	1.00513	0.247067	0.0400796	38	0.884252	0.300307	0.0567527	28	DNA-binding transcriptional regulator IlvY
VC0162		0.865891	0.308347	0.0470224	43	0.938487	0.149959	0.0198626	57	0.912935	0.215988	0.0281193	60	0.947506	0.147579	0.0187425	62	0.910808	0.342922	0.0406974	71	0.892934	0.343125	0.0419194	67	ketol-acid reductoisomerase
VC0163		ND			2	ND			4	ND			2	ND			3	0.27789	0.417125	0.170291	6	ND			1	hypothetical protein
VC0164		0.931707	0.205743	0.0156424	174	0.929759	0.181558	0.0119457	232	0.829193	0.287393	0.0225797	168	0.746171	0.340888	0.0251991	189	0.966605	0.262895	0.0161801	278	0.939177	0.37203	0.029979	159	multidrug resistance protein, putative
VC0165		0.922634	0.244328	0.0320819	58	0.910981	0.239746	0.0295107	66	0.852692	0.246948	0.0313624	62	0.803369	0.326257	0.0421196	60	0.987341	0.282451	0.0330584	74	0.984436	0.319625	0.0405924	62	hypothetical protein
VC0166		0.930859	0.174928	0.0381725	21	0.895157	0.289927	0.0591811	24	0.864949	0.338476	0.0904615	14	0.864669	0.302969	0.0782263	15	1.02657	0.142632	0.0304092	22	1.05693	0.335563	0.0930684	13	TetR family transcriptional regulator
VC0167		ND				ND				ND				ND				ND				ND				ATP-dependent DNA helicase Rep	Essential
VC0168		0.80489	0.325714	0.072832	20	0.831326	0.301658	0.0560165	29	0.653198	0.392604	0.118375	11	0.897482	0.141174	0.0342398	17	0.477552	0.515736	0.103147	25	0.377784	0.424729	0.122609	12	cytochrome c5
VC0169		ND				ND				ND				ND				ND				ND				hypothetical protein	Essential
VC0170		0.952128	0.183151	0.0184073	99	0.909763	0.149453	0.0135308	122	0.940994	0.144986	0.0155442	88	0.940474	0.175722	0.0171487	106	0.974439	0.252783	0.0211388	147	0.96288	0.280383	0.0249785	127	peptide ABC transporter, ATP-binding protein
VC0171		0.950962	0.164667	0.0195424	71	0.943883	0.167136	0.0171478	95	0.912462	0.210586	0.0261199	66	0.958367	0.154514	0.0173841	79	0.966267	0.281581	0.0255983	124	0.954208	0.285798	0.0309992	86	peptide ABC transporter, periplasmic peptide-binding protein
VC0172		0.958421	0.105098	0.015014	49	0.95129	0.227946	0.0301921	57	0.930592	0.15729	0.0182845	75	0.929145	0.195541	0.0228863	74	0.985633	0.183959	0.0201921	84	0.974296	0.342785	0.0385663	79	peptide ABC transporter, permease protein
VC0173		0.936343	0.157781	0.0189946	69	0.86015	0.247075	0.0281568	77	0.92847	0.144251	0.0165467	76	0.935903	0.14658	0.0168139	77	1.00343	0.26325	0.0272978	94	1.02301	0.230927	0.0230927	100	peptide ABC transporter, permease protein
VC0174		0.964993	0.100057	0.0218343	21	0.90188	0.145918	0.0262076	31	0.91725	0.235526	0.0363425	42	0.948043	0.187976	0.0286661	43	0.990674	0.33321	0.0508141	43	0.946301	0.23523	0.0336043	49	hypothetical protein
VC0175		0.930591	0.181476	0.0130969	194	0.898496	0.220209	0.0149488	218	0.939527	0.196814	0.0127309	244	0.988216	0.157711	0.0102014	245	1.03204	0.209194	0.0124794	289	0.999825	0.250725	0.014904	290	deoxycytidylate deaminase-related protein
VC0176		0.995846	0.0730991	0.0120174	37	0.964081	0.061223	0.00865823	50	1.00079	0.11544	0.0288599	16	1.02071	0.0755163	0.01481	26	0.967275	0.197407	0.0276426	51	1.01005	0.238519	0.0409057	34	transcriptional regulator, putative
VC0177		0.878088	0.269587	0.0322219	70	0.907658	0.198365	0.0224604	78	0.913536	0.237308	0.029898	63	0.960891	0.238101	0.0307387	60	0.988415	0.269106	0.0288512	88	0.9103	0.317739	0.0379771	70	hypothetical protein
VC0178		0.953198	0.15811	0.0179024	78	0.935054	0.154212	0.0155777	98	0.921496	0.215275	0.0243751	78	0.966014	0.161678	0.0176405	85	1.0512	0.177269	0.016459	118	1.00956	0.236982	0.0245739	93	patatin-related protein
VC0179		0.947406	0.124879	0.0150336	69	0.919738	0.188447	0.0199753	89	0.977405	0.112147	0.0122363	84	0.991827	0.184122	0.0195169	89	0.998894	0.229988	0.0226614	104	0.969414	0.30334	0.029603	106	hypothetical protein
VC0180		0.938741	0.169838	0.014008	147	0.912237	0.188539	0.0144603	170	0.934915	0.217283	0.0165197	175	0.96408	0.192185	0.0144865	179	0.993399	0.282307	0.0197654	212	0.995469	0.224478	0.0159128	203	hypothetical protein
VC0181		0.969364	0.148546	0.0214408	48	0.937053	0.157753	0.020895	57	0.933137	0.183074	0.0228842	64	0.975559	0.150609	0.0186808	65	0.97979	0.239905	0.0266561	81	0.978516	0.238381	0.0254115	89	hypothetical protein
VC0182		0.970564	0.0737701	0.00944529	61	0.923043	0.166251	0.0193263	74	0.946734	0.184984	0.0219536	71	0.979591	0.102726	0.0120232	74	0.978452	0.284468	0.0303244	88	0.979129	0.228293	0.0247618	86	hypothetical protein
VC0183		0.938373	0.14502	0.00710164	420	0.924785	0.147055	0.00651808	511	0.941589	0.175534	0.00828398	465	0.976101	0.13154	0.00593028	501	1.03255	0.185021	0.00734233	667	1.01317	0.241521	0.0101074	586	hypothetical protein
VC0184		0.931549	0.181202	0.00957682	362	0.915571	0.1915	0.0092891	428	0.946113	0.169054	0.00839003	416	0.97807	0.143356	0.00698673	427	1.03408	0.180257	0.00806942	523	0.992069	0.270663	0.0122273	505	hypothetical protein
VC0185		0.934216	0.18078	0.0136268	177	0.928407	0.189884	0.0131661	209	0.947908	0.168689	0.0131324	165	0.970076	0.20335	0.0152847	179	1.02406	0.170381	0.0112346	239	1.00818	0.252985	0.0174576	212	transposase, putative
VC0186		0.869905	0.274445	0.0257042	114	0.899826	0.209593	0.0176509	141	0.915126	0.247719	0.0230999	117	0.90355	0.266953	0.0236882	129	0.954572	0.269652	0.0215206	163	0.949499	0.314186	0.0281017	128	glutathione reductase
VC0187		0.953093	0.100589	0.0119377	71	0.901975	0.170469	0.0191793	79	0.972903	0.0926434	0.00921836	103	0.999347	0.0757275	0.0079384	92	1.01052	0.173099	0.0164298	111	1.01133	0.242481	0.0220437	122	hypothetical protein
VC0188		0.93051	0.167311	0.013186	162	0.910077	0.166445	0.011981	194	0.906907	0.206941	0.0151737	187	0.917438	0.230399	0.0166276	195	0.971472	0.22567	0.0150782	230	0.920236	0.292473	0.0201347	216	oligopeptidase A
VC0189		1.07043	0.0906623	0.0370127	6	1.01878	0.109121	0.0363736	9	0.957309	0.0736848	0.0300817	6	0.983432	0.0483873	0.0171075	8	0.98002	0.297241	0.0896215	11	1.10831	0.141802	0.0427548	11	hypothetical protein
VC0190	uvrD	0.663897	0.326571	0.0323354	102	0.549109	0.378579	0.032827	133	0.431307	0.393667	0.0368703	116	0.312713	0.410331	0.0373028	124	0.350343	0.434329	0.0385404	130	0.646003	0.473937	0.0929467	26	DNA-dependent helicase II
VC0191		0.917395	0.215322	0.0304512	50	0.888502	0.207849	0.0248427	70	0.930393	0.226164	0.0323091	50	0.95895	0.190131	0.024753	59	0.966772	0.305595	0.0337473	82	1.04534	0.264252	0.0311424	72	hypothetical protein
VC0192		0.955824	0.155424	0.0211505	54	0.917166	0.148964	0.0180645	68	0.96921	0.0904895	0.0109735	68	0.981812	0.0923473	0.0108832	72	1.04131	0.179981	0.0186632	93	1.00936	0.246686	0.026003	90	AraC/XylS family transcriptional regulator
VC0193		0.949653	0.118441	0.0447666	7	0.992723	0.076663	0.0255543	9	1.00145	0.0849216	0.0300243	8	0.961742	0.0698494	0.0246955	8	0.869054	0.313685	0.0945797	11	0.796297	0.40068	0.12081	11	hypothetical protein
VC0194		0.948433	0.149472	0.0116013	167	0.929172	0.127464	0.008775	211	0.958859	0.140257	0.00967868	211	0.973516	0.137228	0.00921013	226	1.04259	0.176372	0.0103391	298	0.957433	0.248265	0.014706	290	gamma-glutamyltranspeptidase
VC0195		0.968004	0.0923833	0.0128113	52	0.920644	0.15883	0.0187183	72	0.948579	0.16207	0.022262	54	0.963667	0.195351	0.0244189	64	0.982255	0.242955	0.0258991	88	1.03769	0.221567	0.024468	82	rarD protein
VC0196		0.896546	0.210415	0.0246272	73	0.8294	0.26436	0.0275614	92	0.8991	0.233856	0.0261459	81	0.903294	0.252465	0.0275462	84	0.895949	0.356624	0.0353111	103	0.91731	0.315446	0.0334372	89	ATP-dependent DNA helicase RecQ
VC0197		0.93545	0.17315	0.0377844	21	0.966046	0.0982693	0.0192722	26	0.935661	0.239282	0.0535051	20	0.985242	0.0883968	0.0202796	19	1.02378	0.293708	0.0555056	28	0.963265	0.258685	0.0507322	26	gene 3 protein-related protein
VC0198		0.945378	0.150571	0.0274904	30	0.916938	0.0927317	0.0154553	36	0.964015	0.158343	0.0211595	56	0.976449	0.0964418	0.0132473	53	1.02073	0.198086	0.0277375	51	0.985739	0.211127	0.0254166	69	hypothetical protein
VC0199		0.925944	0.167555	0.0146393	132	0.909626	0.184364	0.0149539	153	0.928106	0.237559	0.0215075	125	0.940993	0.262322	0.0232773	128	1.03695	0.204503	0.0155481	177	0.96704	0.302144	0.0259086	138	hemolysin secretion ATP-binding protein, putative
VC0200		0.960651	0.153665	0.0107325	206	0.91494	0.173664	0.0102689	287	0.943725	0.182721	0.0131868	198	0.990762	0.0864391	0.00568728	233	1.03087	0.213713	0.0117467	346	1.00011	0.272766	0.0168838	266	iron(III) compound receptor
VC0201		0.923181	0.196704	0.0319097	38	0.890036	0.262268	0.0382557	47	0.940734	0.204781	0.0308719	44	0.977628	0.206563	0.0304561	46	0.965273	0.298438	0.0402414	55	0.943836	0.305262	0.0423322	52	iron(III) ABC transporter, ATP-binding protein
VC0202		0.946265	0.17216	0.0181472	90	0.92556	0.146699	0.0135623	117	0.964008	0.11683	0.0134013	77	0.989726	0.123179	0.0127731	94	1.03167	0.175895	0.0150828	139	1.00208	0.284269	0.0265082	116	iron(III) ABC transporter, periplasmic iron-compound-binding protein
VC0203		0.937757	0.192385	0.0144199	179	0.912374	0.185651	0.0125739	218	0.928147	0.197189	0.0139433	204	0.951247	0.170023	0.0118461	211	1.02948	0.204267	0.0123855	282	0.976446	0.284679	0.0190209	230	iron-hydroxamate transporter permease subunit
VC0204		0.951604	0.14921	0.0173453	74	0.952507	0.110344	0.0113811	94	0.93453	0.154106	0.018688	69	0.979752	0.117651	0.0129139	83	1.02245	0.207053	0.0186693	125	0.959791	0.269031	0.027316	97	hypothetical protein
VC0205		ND			2	ND			1	ND			3	ND			2	ND			2	ND			1	hypothetical protein
VC0206	murQ	0.918267	0.205619	0.0261137	62	0.922042	0.157539	0.0177245	79	0.914259	0.230354	0.0277314	70	0.931753	0.237338	0.0268732	79	1.02789	0.201962	0.0205061	98	0.961679	0.308654	0.0363752	72	N-acetylmuramic acid-6-phosphate etherase
VC0207	murP	0.921089	0.207391	0.0202393	105	0.908405	0.1864	0.0165403	127	0.944938	0.165754	0.015324	117	0.941896	0.200179	0.0181234	123	1.02275	0.263511	0.0213735	155	0.997209	0.269229	0.022514	146	N-acetylmuramic acid phosphotransfer permease
VC0208		0.936142	0.217595	0.0357724	37	0.91996	0.187897	0.0274077	47	0.86293	0.30964	0.0632049	24	0.940671	0.22979	0.0442231	27	0.93151	0.341495	0.0509071	45	1.00495	0.207325	0.0350444	35	hypothetical protein
VC0209		0.905332	0.197021	0.0270629	53	0.92305	0.173505	0.0210406	68	0.8752	0.249435	0.0288023	76	0.900762	0.241485	0.0271692	79	1.04679	0.224241	0.0233787	92	0.946855	0.347202	0.038342	82	hypothetical protein
VC0210	rph	0.88111	0.129554	0.0204842	40	0.860935	0.128505	0.0208463	38	0.557213	0.372962	0.0442624	72	0.546389	0.424946	0.052708	65	0.947474	0.232923	0.0288905	65	0.88414	0.325188	0.056608	33	ribonuclease PH
VC0211	pyrE	0.893767	0.258415	0.0365454	50	0.931633	0.182955	0.024233	57	0.322436	0.351201	0.0523539	45	0.224852	0.334731	0.0473381	50	0.974386	0.288122	0.0344372	70	0.899441	0.383222	0.10242	14	orotate phosphoribosyltransferase
VC0212		0.819899	0.278892	0.0390527	51	0.894008	0.220905	0.028055	62	0.866691	0.252097	0.034306	54	0.911223	0.207077	0.0265135	61	0.336502	0.42783	0.0497342	74	0.918536	0.407494	0.0535065	58	lipid A biosynthesis (KDO)2-(lauroyl)-lipid IVA acyltransferase
VC0213		ND				ND				ND				ND				ND				ND				lipid A biosynthesis lauroyl acyltransferase	Essential
VC0214	slmA	0.985447	0.102713	0.0201436	26	0.971058	0.119947	0.0226678	28	0.912649	0.195354	0.0284953	47	0.89712	0.263061	0.039658	44	0.848754	0.375297	0.0579096	42	0.984494	0.219234	0.0346639	40	nucleoid occlusion protein
VC0215		ND				ND				ND				ND				ND				ND				bifunctional phosphopantothenoylcysteine decarboxylase/phosphopantothenate synthase	Essential
VC0216		0.914554	0.240477	0.0244167	97	0.884013	0.243399	0.0234211	108	0.926696	0.197144	0.0178486	124	0.944931	0.203973	0.0183917	124	1.01101	0.228557	0.0199691	133	0.996146	0.266716	0.0231272	136	methyl-accepting chemotaxis protein
VC0217	radC	0.95586	0.22342	0.0329415	46	0.916564	0.235709	0.0326869	52	0.97383	0.0633567	0.0083918	57	0.96525	0.145168	0.0193989	56	1.04873	0.205836	0.0263546	61	0.963745	0.210487	0.0241445	77	DNA repair protein RadC
VC0218		ND				ND				ND				ND				ND				ND				ribosomal protein L28	Essential
VC0219	rpmG	0.473766	0.39288	0.175701	5	0.46689	0.492362	0.164121	9	0.367829	0.441638	0.166924	7	0.164908	0.35074	0.143189	6	0.442525	0.447394	0.149131	9	ND				50S ribosomal protein L33
VC0220		0.983074	0.0860803	0.030434	8	0.926044	0.0749451	0.0236997	10	0.693709	0.384132	0.128044	9	0.916695	0.15524	0.0468066	11	0.978389	0.274482	0.0733585	14	0.879636	0.424621	0.150126	8	hypothetical protein
VC0221		0.94961	0.132475	0.0173948	58	0.912738	0.161088	0.0193927	69	0.953503	0.144508	0.0185023	62	0.984858	0.149239	0.0185108	65	1.0428	0.114583	0.0116946	96	0.972276	0.251302	0.0282737	79	formamidopyrimidine-DNA glycosylase
VC0222	coaD	ND				ND				ND				ND				ND				ND				phosphopantetheine adenylyltransferase	Essential
VC0223		0.63746	0.391472	0.057102	47	0.443554	0.443572	0.0572648	60	0.0868249	0.180301	0.0313863	33	0	X	X	45	0.0169818	0.0863713	0.0157692	30	ND				ADP-heptose--LPS heptosyltransferase II, putative
VC0224		0.798397	0.299088	0.0467097	41	0.812578	0.25178	0.0359685	49	0.237244	0.358898	0.0535014	45	0.190844	0.368803	0.0526862	49	0.667129	0.43863	0.0575949	58	1.15529	0.117916	0.0393055	9	lipopolysaccharide biosynthesis glycosyltransferase, putative
VC0225		0.268908	0.393262	0.0664734	35	0.25488	0.550236	0.0839102	43	0.239044	0.360425	0.0556148	42	0.209532	0.36998	0.0577812	41	0.499657	0.507205	0.0976117	27	0.819531	0.380816	0.143935	7	lipopolysaccharide biosynthesis protein, putative
VC0226		0.986716	0.070659	0.0315996	5	0.947671	0.0360914	0.0161406	5	ND			2	ND			3	0.897662	0.427327	0.151083	8	ND			4	hypothetical protein
VC0227		ND				ND				ND				ND				ND				ND				3-deoxy-D-manno-octulosonic-acid kinase	Essential
VC0228		0.933478	0.153828	0.00978782	248	0.916425	0.195807	0.0117862	277	0.943519	0.169054	0.00964844	314	0.986305	0.106966	0.00604607	317	1.04909	0.187586	0.00963563	386	0.997343	0.24865	0.0125909	400	hypothetical protein
VC0229		0.938567	0.20001	0.0188154	113	0.919186	0.177539	0.0149515	141	0.945177	0.181358	0.0164194	124	0.952844	0.216479	0.0187009	136	1.0511	0.232154	0.0172084	184	1.00328	0.259197	0.0205557	161	hypothetical protein
VC0230		0.972249	0.100858	0.0145576	48	0.925051	0.155632	0.020092	60	0.92029	0.211787	0.0266826	64	0.929488	0.259209	0.0309814	70	1.02732	0.243783	0.027603	78	1.04247	0.189989	0.0215121	78	hypothetical protein
VC0231		0.973025	0.0778701	0.0104058	56	0.934905	0.134554	0.0170884	62	0.961609	0.153824	0.0183855	70	0.97529	0.160104	0.0190008	71	1.01128	0.261336	0.0290373	81	0.999638	0.289294	0.0304943	90	hypothetical protein
VC0232		0.998761	0.101371	0.0358402	8	0.958815	0.213805	0.0676112	10	0.853798	0.236385	0.0631765	14	0.892242	0.253816	0.0678352	14	1.07125	0.125492	0.031373	16	1.04769	0.183049	0.0551912	11	hypothetical protein
VC0233		ND			3	ND			4	ND				ND			1	ND			3	ND			2	3-deoxy-D-manno-octulosonic-acid transferase
VC0234		0.691539	0.357945	0.092421	15	0.872103	0.42191	0.11276	14	0.751314	0.236189	0.0572841	17	0.650639	0.373316	0.103539	13	0.563049	0.514183	0.132762	15	0.906622	0.352284	0.0977061	13	hypothetical protein
VC0235		0.838206	0.269723	0.040208	45	0.850224	0.307151	0.039653	60	0.456721	0.415738	0.0665713	40	0.427008	0.429289	0.0632951	46	0.730033	0.433152	0.0514057	72	0.553588	0.478385	0.112756	18	lipopolysaccharide biosynthesis protein, putative
VC0236		0.348194	0.400667	0.0530696	57	0.329558	0.374738	0.0408873	84	0.026949	0.111549	0.0223098	25	0	X	X	39	0	X	X	28	ND				ADP-heptose--LPS heptosyltransferase II
VC0237		0.615031	0.387363	0.0305285	163	0.557557	0.380293	0.0262427	211	0.0946245	0.200344	0.0167536	148	0.0677698	0.215886	0.016656	171	0.187283	0.324036	0.0254587	170	ND			2	hypothetical protein
VC0238		0.826512	0.249207	0.0302208	68	0.703205	0.387728	0.0456942	72	0.446763	0.446096	0.0511708	77	0.342799	0.464017	0.0543091	74	0.751437	0.512113	0.0583607	77	0.941052	0.384787	0.075463	26	hexapaptide repeat-containing transferase
VC0239		0.631615	0.38261	0.0308316	156	0.511906	0.440729	0.0304859	210	0.0532383	0.161808	0.014771	124	0.0595239	0.223017	0.0182093	153	0.330242	0.467612	0.0375595	161	ND			1	hypothetical protein
VC0240	rfaD	0.344321	0.411836	0.0531679	60	0.258768	0.389494	0.0446781	76	0.169043	0.31901	0.0460452	49	0.0805323	0.256204	0.0328036	61	0.177614	0.412277	0.0643868	41	0.852219	0.401771	0.164022	6	ADP-L-glycero-D-mannoheptose-6-epimerase
VC0241		1.00439	0.152583	0.0126279	146	1.00313	0.136382	0.00994667	188	0.265306	0.331944	0.0274719	150	0.348205	0.409234	0.0316674	171	1.21423	0.187859	0.0123071	233	1.12207	0.468413	0.0956144	24	mannose-1-phosphate guanylyltransferase
VC0242		1.00068	0.112324	0.00762502	218	1.00076	0.113324	0.00677239	280	0.221321	0.309721	0.020467	236	0.306523	0.398593	0.0252598	258	1.21142	0.170536	0.00906388	357	1.24422	0.471464	0.079692	35	phosphomannomutase
VC0243		0.976853	0.135229	0.0110414	150	1.00621	0.0787495	0.0057434	188	0.228272	0.310466	0.0243925	167	0.352978	0.408812	0.0308154	180	1.12817	0.211618	0.0136884	242	1.28705	0.39385	0.0757965	27	GDP-mannose 4,6-dehydratase
VC0244		0.964188	0.170346	0.0141955	144	0.974966	0.164056	0.0118707	191	0.165844	0.272477	0.0224735	151	0.270376	0.398343	0.0315906	162	1.08822	0.189634	0.0126705	230	1.14623	0.592424	0.209454	8	perosamine synthase
VC0245		0.934766	0.177668	0.0146538	147	0.982575	0.152083	0.0115627	173	0.194997	0.296624	0.0224227	178	0.268015	0.391353	0.0293331	182	1.07187	0.21183	0.0144132	222	1.32723	0.115647	0.02986	15	rfbG protein
VC0246		0.732312	0.328382	0.040421	66	0.831097	0.295609	0.0336877	77	0.103411	0.255315	0.0316679	66	0.0865907	0.273238	0.0313425	76	0.113987	0.28687	0.0307557	87	ND			2	lipopolysaccharide/O-antigen transport protein
VC0247		0.691269	0.366144	0.0373694	96	0.797964	0.338191	0.0295479	131	0.0565084	0.143526	0.0160467	82	0.0212475	0.131083	0.0133095	99	0.0721001	0.212736	0.0183094	140	ND				lipopolysaccharide/O-antigen transport protein
VC0248		0.889236	0.256577	0.0386804	44	0.960063	0.170282	0.0236139	52	0.139473	0.29085	0.0448791	43	0.248592	0.391242	0.0558918	49	0.986838	0.28398	0.0334674	72	1.32523	0.0805451	0.0328824	6	acyl carrier protein, putative
VC0249		0.964737	0.168501	0.0090718	347	1.00039	0.11336	0.00546037	433	0.204325	0.30885	0.0156795	404	0.26964	0.399737	0.0195518	434	0.960102	0.282191	0.0121774	567	1.24039	0.376818	0.0574642	43	rfbL protein
VC0250		0.938279	0.201465	0.0310868	42	0.933502	0.245217	0.0313969	61	0.168609	0.289441	0.0409331	51	0.17532	0.328537	0.043139	58	0.866356	0.425775	0.0498332	76	1.27345	0.264662	0.108048	6	iron-containing alcohol dehydrogenase family protein RfbM
VC0251		0.977182	0.142158	0.0101283	199	1.01101	0.120278	0.00750275	257	0.172481	0.273782	0.0196564	200	0.214153	0.371736	0.024673	234	0.889305	0.37938	0.0213081	331	1.2609	0.43163	0.136493	10	acyl protein synthase/acyl-CoA reductase RfbN
VC0252		0.935941	0.112174	0.0272062	17	0.960184	0.0661247	0.0144296	21	0.296891	0.289631	0.0591207	24	0.409036	0.425776	0.0835016	26	1.07208	0.176544	0.0368119	23	ND			4	acetyltransferase
VC0253		1.00062	0.0627595	0.0174064	13	0.989491	0.111404	0.0287645	15	0.922255	0.235255	0.070932	11	1.01089	0.0679869	0.0214994	10	1.05182	0.157531	0.0361401	19	0.996721	0.289263	0.0746875	15	IS1004 transposase
VC0254		0.952371	0.10484	0.0145387	52	0.954596	0.0925668	0.0113088	67	0.896349	0.195088	0.0316474	39	0.957502	0.203631	0.0300238	46	1.00555	0.215335	0.023495	84	0.957175	0.457472	0.0646963	50
VC0255		0.938127	0.237637	0.0375736	40	0.949319	0.151885	0.0192895	62	0.857845	0.299227	0.0441186	47	0.923125	0.234131	0.0310114	57	1.08598	0.159888	0.01755	87	0.928147	0.393873	0.0568507	48	rfbT-related protein
VC0256		1.02111	0.139953	0.0154552	82	1.01186	0.0950125	0.00922843	106	1.0007	0.160607	0.0165653	96	0.999496	0.127754	0.0134664	91	0.99617	0.160269	0.013264	148	0.990157	0.214192	0.019635	120	transposase OrfAB, subunit A
VC0257		1.02696	0.134608	0.0117161	132	1.02812	0.10221	0.00774855	174	1.03318	0.0788299	0.00722632	120	1.02005	0.0670939	0.00620283	118	1.00049	0.176668	0.0119655	223	1.00159	0.151345	0.0117114	171	transposase OrfAB, subunit B
VC0258		0.941598	0.144146	0.0205923	49	0.92934	0.136447	0.0169241	65	0.76916	0.386497	0.0449293	75	0.916057	0.281746	0.0319014	78	1.00663	0.228861	0.0232373	98	0.897744	0.362588	0.0480259	57	rfbT protein
VC0259		0.930939	0.200345	0.0133861	225	0.977415	0.138055	0.00838627	271	0.258905	0.34351	0.0226013	237	0.368008	0.43867	0.0276886	257	1.09369	0.174185	0.00978318	327	1.13204	0.376258	0.0485748	60	lipopolysaccharide biosynthesis protein RfbV
VC0260		0.902892	0.155892	0.0115239	184	0.935814	0.148875	0.0098595	229	0.150289	0.264633	0.0194562	191	0.189396	0.314498	0.0220193	210	0.964979	0.311143	0.0184305	298	1.04342	0.523181	0.233974	5	mannosyl-transferase
VC0261		0.913376	0.0961436	0.0429967	5	1.00111	0.107352	0.0480093	5	0.810397	0.378219	0.142953	7	0.927417	0.190277	0.0719179	7	1.09266	0.0859007	0.0271642	10	0.884076	0.469963	0.210174	5	hypothetical protein
VC0262		0.957561	0.135354	0.0160635	71	0.933462	0.138271	0.0147398	88	0.958193	0.189004	0.020872	83	0.961354	0.202345	0.021096	93	1.05987	0.158591	0.0150528	112	1.02257	0.221553	0.0212209	110	UDP-glucose 4-epimerase
VC0263		0.905051	0.196912	0.0348095	32	0.989524	0.109406	0.0179862	37	0.135748	0.25701	0.0356409	52	0.16885	0.365288	0.0521839	49	0.196175	0.312378	0.0437417	51	ND			2	galactosyl-transferase, putative
VC0264		0.948569	0.139498	0.0136789	104	0.932748	0.161018	0.0152148	112	0.969563	0.0859767	0.00794855	117	0.959569	0.165648	0.0152491	119	1.05817	0.175138	0.014855	142	0.984323	0.233396	0.0190567	153	hypothetical protein
VC0265		0.919853	0.201653	0.0221343	83	0.920295	0.159586	0.0152856	109	0.9271	0.207702	0.0198943	112	0.98437	0.0832988	0.00780165	115	1.03276	0.216414	0.0179722	147	0.984488	0.241905	0.0211353	132	hypothetical protein
VC0266		0.901783	0.279676	0.0453695	38	0.89919	0.264547	0.0394364	45	0.906399	0.318955	0.0592285	29	0.893982	0.289505	0.0503963	33	0.992526	0.330023	0.0476347	48	0.911039	0.321486	0.0577405	31	hypothetical protein
VC0267		0.961449	0.0868138	0.011706	55	0.890576	0.224465	0.0280581	64	0.929226	0.221706	0.0281567	62	0.96285	0.135665	0.0165742	67	0.990728	0.268527	0.0300222	80	0.98169	0.215643	0.0244168	78	D-isomer specific 2-hydroxyacid dehydrogenase family protein
VC0268		0.879777	0.227386	0.030118	57	0.868752	0.24846	0.0308176	65	0.915127	0.254155	0.0339629	57	0.969807	0.180884	0.0229722	62	0.87275	0.330897	0.0374667	78	0.913108	0.274268	0.0332599	68	hypothetical protein
VC0269		0.963169	0.125612	0.0122005	106	0.946189	0.120544	0.0103366	136	0.496718	0.407829	0.0369231	125	0.771913	0.334871	0.0289284	137	1.15621	0.16755	0.0121875	190	0.876757	0.40868	0.0523261	61	mannose-6-phosphate isomerase
VC0270		0.921382	0.177978	0.0220754	65	0.917265	0.136835	0.0147553	86	0.966996	0.126725	0.0159659	64	0.995539	0.11836	0.013667	75	1.01866	0.186225	0.0180878	107	0.998943	0.245668	0.0256127	93	ROK family protein
VC0271		0.948715	0.156699	0.016337	92	0.900713	0.188178	0.0177023	113	0.952209	0.181831	0.0171053	116	0.929226	0.240581	0.021871	122	1.06936	0.221829	0.0184219	145	1.02515	0.241362	0.0203988	141	hypothetical protein
VC0272		0.947227	0.314892	0.119018	7	0.93525	0.107536	0.0358454	9	0.956939	0.11229	0.0424417	7	1.02721	0.035227	0.0117423	9	1.00129	0.287979	0.079871	13	0.940396	0.326661	0.098492	11	hypothetical protein
VC0273		0.962167	0.0534166	0.0218072	6	0.947039	0.044791	0.0149303	9	0.945379	0.0842412	0.0297837	8	0.82535	0.243094	0.0810314	9	1.09718	0.162866	0.0491061	11	0.934085	0.286444	0.0863661	11	DNA-binding protein HU
VC0274		0.950637	0.113401	0.0179303	40	0.956937	0.0991124	0.0141589	49	0.96617	0.194432	0.0283608	48	0.964454	0.225868	0.0326012	48	0.925667	0.306293	0.037702	66	0.950025	0.313015	0.0414599	57	hypothetical protein
VC0275		0.960022	0.197333	0.0223435	78	0.928483	0.135672	0.0137049	98	0.11171	0.203785	0.0219747	88	0.064162	0.166502	0.0176491	90	0.973101	0.307308	0.0275971	126	ND			1	phosphoribosylamine--glycine ligase
VC0276	purH	0.945313	0.189009	0.0182722	107	0.906136	0.18334	0.0158381	134	0.0942489	0.191092	0.0175914	121	0.05119	0.145174	0.013037	126	0.924224	0.2942	0.0229035	170	ND			1	bifunctional phosphoribosylaminoimidazolecarboxamide formyltransferase/IMP cyclohydrolase
VC0277	zntR	0.847154	0.138489	0.0261719	28	0.799711	0.250062	0.0428852	34	0.949719	0.211309	0.0334108	40	0.971081	0.220529	0.0348687	40	0.549948	0.422585	0.0597625	50	0.902217	0.392186	0.0653643	36	zinc-responsive transcriptional regulator
VC0278		0.920712	0.198904	0.0197917	101	0.873763	0.245627	0.0221474	123	0.883925	0.278346	0.027294	106	0.961325	0.168924	0.0156171	118	1.0361	0.211248	0.0177903	146	0.924169	0.309898	0.027499	130	DNA-binding transcriptional activator CadC
VC0279		ND			4	0.878952	0.179101	0.0800966	5	0.836687	0.243615	0.0994556	6	0.802563	0.362079	0.147818	6	1.09069	0.112651	0.039828	8	0.830573	0.417637	0.186773	5	hypothetical protein
VC0280		0.833475	0.310957	0.0366467	72	0.886788	0.245558	0.0250622	96	0.833313	0.351578	0.0450149	63	0.900967	0.269013	0.0302663	79	0.97059	0.266442	0.0258792	110	0.904865	0.36166	0.0417609	75	lysine/cadaverine antiporter
VC0281		0.911828	0.22472	0.0173375	169	0.8997	0.228369	0.0163121	197	0.967199	0.158519	0.011294	200	0.991417	0.117429	0.00843094	197	1.013	0.235429	0.0154567	237	0.987823	0.245076	0.0154384	257	lysine decarboxylase, inducible
VC0282		0.937899	0.15292	0.0137883	124	0.929008	0.147677	0.0120578	150	0.908977	0.269724	0.0247256	121	0.966787	0.192564	0.0167606	134	1.0114	0.192148	0.0145667	179	0.926711	0.332291	0.0273141	148	methyl-accepting chemotaxis protein
VC0283		0.952813	0.120382	0.0158069	58	0.937877	0.162869	0.0183242	79	0.902838	0.243459	0.0389846	40	0.907214	0.27182	0.03699	54	0.999807	0.253193	0.0263972	96	1.00066	0.212715	0.0267996	63	hypothetical protein
VC0284		0.978334	0.124188	0.00910592	187	0.914628	0.185865	0.0120988	237	0.930774	0.229237	0.0159331	213	0.937878	0.225261	0.0151186	226	1.02858	0.190913	0.0114709	289	1.00593	0.259369	0.0161476	264
VC0285		0.919124	0.153554	0.0252442	37	0.855028	0.235933	0.0368465	41	0.714484	0.322261	0.0438541	54	0.651121	0.386339	0.0551913	49	0.997372	0.266282	0.0352699	57	0.723873	0.483876	0.0914439	28	keto-hydroxyglutarate-aldolase/keto-deoxy- phosphogluconate aldolase
VC0286		0.939775	0.171103	0.0178387	92	0.880988	0.207331	0.0209436	98	0.915674	0.184025	0.01578	138	0.945675	0.126078	0.0112319	127	1.02805	0.207026	0.0180193	133	1.00097	0.220393	0.0176456	158	gluconate permease, putative
VC0287		0.995424	0.108365	0.0255418	18	0.873841	0.170833	0.0341665	25	0.825216	0.266814	0.0533629	25	0.817233	0.327592	0.0608324	29	0.95155	0.347977	0.0588188	35	0.81445	0.412432	0.085998	23	thermoresistant gluconokinase
VC0288		0.950951	0.169132	0.0148339	131	0.93359	0.175841	0.0139892	159	0.917586	0.214827	0.0175406	152	0.971798	0.130549	0.0102569	164	1.03715	0.192641	0.013939	194	0.979209	0.272492	0.020838	173	phosphogluconate dehydratase
VC0289		0.862063	0.195881	0.0264126	55	0.837845	0.244565	0.0296578	68	0.274264	0.341649	0.052101	43	0.257946	0.362056	0.0492695	54	0.783269	0.431798	0.048581	80	0.643352	0.508246	0.192099	7	gluconate utilization system gnt-I transcriptional repressor
VC0290	fis	0.575983	0.369982	0.0872055	18	0.534089	0.464513	0.103868	20	0.50072	0.420527	0.0841055	25	0.462264	0.445684	0.0929316	23	0.684017	0.461232	0.11909	15	0.670739	0.421845	0.159443	7	DNA-binding protein Fis
VC0291		0.723507	0.313541	0.03889	65	0.715878	0.36696	0.0395703	86	0.594238	0.399772	0.0602678	45	0.619423	0.409124	0.0532634	59	0.512881	0.475845	0.0532011	81	0.783142	0.336823	0.0702325	23	NifR3/Smm1 family protein
VC0292		ND			1	ND			1	0.842039	0.0834776	0.0340796	6	0.899272	0.0813911	0.0363992	5	ND			2	1.00131	0.0920645	0.0411725	5	hypothetical protein
VC0293	prmA	0.930552	0.185499	0.0267745	48	0.872192	0.210471	0.0281254	56	0.926593	0.148915	0.0195535	58	0.949541	0.168328	0.0226973	55	0.971462	0.248765	0.0301672	68	0.993041	0.249167	0.0304406	67	ribosomal protein L11 methyltransferase
VC0294		ND			2	ND			1	ND			2	ND			2	ND			2	ND			1	hypothetical protein
VC0295		ND				ND				ND				ND				ND				ND				acetyl-CoA carboxylase biotin carboxylase subunit	Essential
VC0296		ND				ND				ND				ND				ND				ND				acetyl-CoA carboxylase biotin carboxyl carrier protein subunit	Essential
VC0297		ND			4	0.370648	0.401987	0.179774	5	ND				ND			1	ND				ND				3-dehydroquinate dehydratase
VC0298		0.945421	0.183189	0.0133961	188	0.936663	0.182318	0.0118428	238	0.908275	0.232086	0.0186416	159	0.935843	0.222569	0.0165893	183	0.782393	0.40094	0.0250099	271	0.909693	0.324671	0.0227874	207	acetyl-CoA synthetase
VC0299		0.926877	0.193188	0.0336297	33	0.856427	0.237283	0.0379957	39	0.906231	0.230398	0.0383997	36	0.900665	0.196135	0.0314067	39	1.00317	0.298717	0.0440434	46	0.827108	0.372696	0.0537941	48	DNA polymerase III subunit epsilon
VC0300		0.954306	0.191629	0.0164928	135	0.892737	0.199723	0.0161467	153	0.920906	0.224449	0.0180282	156	0.937897	0.229153	0.018004	164	0.783665	0.434164	0.0321824	190	1.08111	0.222964	0.0163927	186	hypothetical protein
VC0301		0.87738	0.139108	0.0419425	11	0.89405	0.111514	0.0298034	14	0.929765	0.261197	0.0652992	16	0.977181	0.190329	0.0461615	17	1.06102	0.182676	0.0372886	24	1.0294	0.171927	0.038444	20	hypothetical protein
VC0302		0.944982	0.181043	0.0199928	82	0.916836	0.16318	0.0158495	106	0.949061	0.217194	0.0212976	105	0.964855	0.196824	0.0186817	112	1.02562	0.221308	0.0197157	130	0.956163	0.299818	0.0274843	120	putative 3-phenylpropionic acid transporter
VC0303		0.957016	0.15594	0.00978456	256	0.933208	0.176223	0.0102083	300	0.948525	0.14502	0.00810688	328	0.975605	0.14917	0.00823651	335	0.874359	0.369468	0.0192337	385	0.854971	0.321066	0.0161957	405	sensor histidine kinase
VC0304		0.922197	0.188923	0.0187062	102	0.83688	0.223419	0.0194461	132	0.899259	0.22284	0.0210564	115	0.952331	0.207412	0.0189341	122	0.739907	0.457462	0.0365094	165	0.771879	0.372731	0.0326907	133	guanosine pentaphosphate phosphohydrolase
VC0305		0.887273	0.212161	0.0207048	105	0.849632	0.246078	0.021666	129	0.871122	0.296319	0.0289178	106	0.966917	0.195409	0.0179131	120	0.594144	0.508016	0.0404156	164	0.646204	0.413851	0.0374683	122	ATP-dependent RNA helicase RhlB
VC0306		0.367398	0.342903	0.0989877	12	0.251248	0.434674	0.102454	18	0.342259	0.419655	0.132707	10	0	X	X	12	0	X	X	6	ND			4	thioredoxin
VC0307	rho	ND				ND				ND				ND				ND				ND				transcription termination factor Rho	Essential
VC0308		0.996183	0.089038	0.0135782	43	0.922575	0.202913	0.0281389	52	0.960471	0.142253	0.0199194	51	0.994773	0.129921	0.01768	54	0.976028	0.285417	0.0351324	66	0.969041	0.315847	0.0385868	67	hypothetical protein
VC0309		ND			1	ND			3	ND				ND				ND				ND				hypothetical protein	Essential
VC0311		0.973446	0.109753	0.0245415	20	0.927317	0.105514	0.0203062	27	0.863079	0.302132	0.0659307	21	0.999348	0.103995	0.0212279	24	0.737715	0.433929	0.0755373	33	0.828067	0.382977	0.081651	22	ferredoxin
VC0312	fre	0.822036	0.29187	0.0421279	48	0.809783	0.315196	0.045028	49	0.939235	0.182228	0.0222628	67	0.934728	0.234633	0.0297984	62	0.796041	0.40821	0.052266	61	0.930992	0.298359	0.033568	80	FMN reductase
VC0313		0.826232	0.186009	0.0831857	5	0.959772	0.184222	0.0823867	5	0.978596	0.0647047	0.0289368	5	ND			2	ND			4	ND			3	hypothetical protein
VC0314		ND				ND				ND				ND				ND				ND				hypothetical protein	Essential
VC0315	pssA	ND				ND				ND				ND				ND				ND				phosphatidylserine synthase	Essential
VC0316		ND			1	ND			3	ND				ND				ND				ND				hypothetical protein	Essential
VC0317		0.929855	0.0876356	0.0226274	15	0.967103	0.0901305	0.021244	18	0.829151	0.272569	0.086194	10	0.932355	0.186328	0.0537881	12	0.909209	0.286488	0.0625169	21	0.948027	0.253978	0.0803149	10	hypothetical protein
VC0318	murB	ND				ND				ND				ND				ND				ND				UDP-N-acetylenolpyruvoylglucosamine reductase	Essential
VC0319		ND				ND				ND				ND				ND				ND				biotin--protein ligase	Essential
VC0320		ND			4	ND			2	0.944897	0.106814	0.0356046	9	0.877829	0.209078	0.0790239	7	ND			4	0.806112	0.376976	0.168589	5	pantothenate kinase
VC0321	tuf	0.89674	0.251799	0.0274735	84	0.854744	0.264592	0.0247813	114	0.776962	0.303081	0.0381846	64	0.645243	0.420378	0.0525473	64	0.756977	0.405207	0.0397338	107	0.781981	0.441504	0.0579724	58	elongation factor Tu
VC0322	secE	ND				ND				ND				ND				ND				ND				preprotein translocase subunit SecE	Essential
VC0323	nusG	ND			2	ND			3	ND				ND				ND				ND				transcription antitermination protein NusG	Essential
VC0324	rplK	ND				ND				ND				ND				ND				ND				50S ribosomal protein L11	Essential
VC0325	rplA	ND				ND				ND				ND				ND				ND				50S ribosomal protein L1	Essential
VC0326	rplJ	ND				ND				ND				ND				ND				ND				50S ribosomal protein L10	Essential
VC0327	rplL	ND				ND				ND				ND				ND				ND				50S ribosomal protein L7/L12	Essential
VC0328	rpoB	ND				ND				ND				ND				ND				ND			2	DNA-directed RNA polymerase subunit beta	Essential
VC0329		ND				ND				ND				ND				ND				ND				DNA-directed RNA polymerase subunit beta'	Essential
VC0330		ND			3	0.912605	0.0869121	0.0388683	5	0.98487	0.126626	0.0478602	7	1.0172	0.0677778	0.0239631	8	1.0285	0.0777441	0.0274867	8	1.10193	0.163434	0.0516824	10	anti-RNA polymerase sigma 70 factor
VC0331	nudC	0.93651	0.191743	0.0234252	67	0.925535	0.177443	0.0195953	82	0.928005	0.224223	0.029442	59	0.947466	0.200686	0.0250857	64	0.979367	0.259931	0.0270997	92	0.92957	0.333303	0.0384865	75	NADH pyrophosphatase
VC0332	hemE	ND				ND				ND				ND				ND				ND				uroporphyrinogen decarboxylase	Essential
VC0333		0.931447	0.211541	0.0379939	31	0.828588	0.323597	0.0531989	37	0.947709	0.189736	0.0340776	32	1.03403	0.0776204	0.0131202	35	0.958562	0.313111	0.0434207	52	0.793665	0.328951	0.0556029	35	TetR family transcriptional regulator
VC0334		0.934926	0.242285	0.044235	30	0.907793	0.214604	0.0343642	39	1.0156	0.233306	0.0433238	29	0.962077	0.255793	0.0467011	30	0.987842	0.304913	0.0435591	49	0.885806	0.357631	0.0596052	36	hypothetical protein
VC0335		0.968315	0.13227	0.0178352	55	0.942052	0.197777	0.0241623	67	0.932914	0.211145	0.0261893	66	0.951993	0.163548	0.0196889	69	0.9325	0.251755	0.0274687	84	0.962023	0.299348	0.0363013	68	NlpD-related protein
VC0336		0.914332	0.214546	0.0875881	6	0.890728	0.294548	0.0981826	9	0.816972	0.30783	0.10261	9	0.759902	0.410856	0.136952	9	0.7669	0.430712	0.15228	8	0.927643	0.39287	0.130957	9	phosphoglyceromutase
VC0337		0.951915	0.165393	0.0153564	116	0.928358	0.165502	0.0144051	132	0.974076	0.121667	0.00993406	151	0.981748	0.142024	0.0115577	152	1.04442	0.151176	0.0118049	168	1.01899	0.207699	0.015068	192	hypothetical protein
VC0338		0.957848	0.157816	0.0158611	99	0.939451	0.207852	0.0190538	119	0.939139	0.222894	0.0200976	123	0.941977	0.197896	0.0178437	124	1.02039	0.239263	0.0192803	156	0.964532	0.268481	0.0212253	161	transporter, putative
VC0339		ND			4	0.860856	0.180517	0.0638224	8	ND			4	0.51941	0.520633	0.212547	6	0.724615	0.382796	0.135339	8	ND			3	phosphatidylserine decarboxylase
VC0340		0.791649	0.290794	0.118716	6	0.818617	0.120625	0.0539452	5	ND			4	ND			4	ND			3	ND				ribosome-associated GTPase
VC0341		ND				ND				ND				ND				ND				ND				oligoribonuclease	Essential
VC0342		0.951422	0.148882	0.0202603	54	0.907756	0.194644	0.0234324	69	0.906028	0.226369	0.0292241	61	0.946807	0.192483	0.0235155	67	0.943293	0.269398	0.0290499	86	0.955961	0.340808	0.0432827	62	iron-sulfur cluster-binding protein
VC0343		ND			4	ND			2	0.822989	0.341591	0.120771	8	0.877965	0.284904	0.127413	5	ND			4	ND			4	hypothetical protein
VC0344		0.607405	0.379567	0.0387394	96	0.720655	0.355254	0.0315237	127	0.255259	0.399598	0.0464523	76	0.251626	0.427903	0.043447	98	0.369236	0.478976	0.0430133	128	0.869437	0.399695	0.0893745	20	N-acetylmuramoyl-L-alanine amidase
VC0345	mutL	0.965427	0.161483	0.0147413	121	0.923313	0.216508	0.0169064	164	0.961696	0.170298	0.0150524	130	0.931003	0.221776	0.0185459	146	0.993582	0.224537	0.0159976	204	0.973739	0.289205	0.0230079	159	DNA mismatch repair protein
VC0346	miaA	0.74695	0.224636	0.0364408	38	0.756158	0.29572	0.0418211	50	0.256639	0.354414	0.059069	37	0.0744553	0.231098	0.0352421	43	0.338407	0.476674	0.0625904	58	0.764161	0.350402	0.132439	7	tRNA delta(2)-isopentenylpyrophosphate transferase
VC0347	hfq	0.438502	0.423789	0.109422	15	0.592532	0.381338	0.0762677	25	0.257048	0.419619	0.148358	8	0.275594	0.402643	0.127327	10	0.681188	0.435978	0.0974877	20	ND			1	RNA-binding protein Hfq
VC0348		0.963729	0.110782	0.0146735	57	0.951937	0.13616	0.0161592	71	0.91411	0.180962	0.0219449	68	1.00833	0.114859	0.0134432	73	0.9143	0.309467	0.0320902	97	0.883415	0.388839	0.0448993	76	putative GTPase HflX
VC0349		0.760302	0.344933	0.0438065	62	0.88306	0.232327	0.0275721	71	0.790637	0.300976	0.0391838	59	0.799426	0.294333	0.0365075	65	0.767461	0.4048	0.0426697	90	0.912614	0.372437	0.0516477	52	hflK protein
VC0350		0.872717	0.164203	0.0519256	10	0.98746	0.181295	0.0604317	9	0.899476	0.122867	0.0268118	21	0.776967	0.255674	0.0586556	19	0.785442	0.355515	0.098602	13	0.908648	0.360414	0.0930585	15	hflC protein
VC0351		0.953283	0.0687262	0.017745	15	0.930513	0.10724	0.0246024	19	0.954595	0.169589	0.0389065	19	0.998166	0.0862504	0.0197872	19	0.986941	0.226306	0.047188	23	0.924934	0.318241	0.0663577	23	hypothetical protein
VC0352		ND			4	0.581621	0.436117	0.15419	8	ND			2	1.0251	0.0357313	0.0159795	5	1.02348	0.0617414	0.0252058	6	ND			2	hypothetical protein
VC0353		0.93505	0.181145	0.0222974	66	0.920711	0.155495	0.0165759	88	0.964456	0.107731	0.0126962	74	0.953432	0.178404	0.0197015	82	1.04838	0.180746	0.0165689	120	1.04247	0.268674	0.0263456	104	hypothetical protein
VC0354		0.908295	0.169213	0.0278184	37	0.940727	0.13552	0.0211647	41	0.89337	0.207292	0.0319859	42	0.900567	0.137919	0.0207921	44	0.884008	0.255186	0.0350525	53	0.850321	0.304898	0.0440082	48	peptidyl-prolyl cis-trans isomerase, FKBP-type
VC0355		ND			1	ND			1	ND				ND				ND			2	ND				hypothetical protein	Essential
VC0356		ND				ND				ND				ND				ND				ND				hypothetical protein	Essential
VC0357		ND				ND				ND				ND				ND				ND				hypothetical protein	Essential
VC0358		ND				ND				ND				ND				ND				ND				hypothetical protein	Essential
VC0359	rpsL	ND				ND				ND				ND				ND				ND				30S ribosomal protein S12	Essential
VC0360		ND				ND				ND				ND				ND				ND				30S ribosomal protein S7	Essential
VC0361		ND				ND				ND				ND				ND				ND				elongation factor G	Essential
VC0362	tuf	0.908764	0.209118	0.0230932	82	0.858094	0.265536	0.0257911	106	0.745591	0.351177	0.0486995	53	0.6766	0.407552	0.0559815	53	0.78013	0.402009	0.0402009	102	0.795108	0.426746	0.0643344	44	elongation factor Tu
VC0363		ND			3	ND			1	1.02272	0.0535008	0.0239263	5	ND			3	ND			2	1.0358	0.153687	0.0627425	6	hypothetical protein
VC0364		0.944399	0.0745407	0.0175694	18	0.948874	0.0849812	0.0166662	26	1.00825	0.0876488	0.0264271	11	0.9674	0.10968	0.0283193	15	1.00185	0.192047	0.0329358	34	0.996909	0.192685	0.046733	17	bacterioferritin-associated ferredoxin
VC0365		0.945298	0.155831	0.0377945	17	0.936736	0.115558	0.0235882	24	1.04804	0.05742	0.0234416	6	0.957974	0.108774	0.0327965	11	0.861497	0.404646	0.0809293	25	1.01365	0.195178	0.0650593	9	bacterioferritin
VC0366	rpsF	ND				ND				ND				ND				ND				ND				30S ribosomal protein S6	Essential
VC0367		ND				ND				ND				ND				ND				ND				primosomal replication protein N	Essential
VC0368	rpsR	ND				ND				ND				ND				ND				ND				30S ribosomal protein S18	Essential
VC0369	rplI	0.901096	0.132686	0.0331714	16	0.697713	0.405019	0.101255	16	0.903643	0.236136	0.06311	14	0.61491	0.488238	0.126062	15	0.595413	0.469525	0.125486	14	0.967196	0.378764	0.133913	8	50S ribosomal protein L9
VC0370		0.996836	0.100658	0.0193716	27	1.03443	0.185927	0.0364634	26	0.967629	0.0949908	0.0173429	30	0.979572	0.168492	0.0307623	30	1.10619	0.173688	0.0302352	33	1.06551	0.170744	0.0266657	41	hypothetical protein
VC0371		ND				ND				ND				ND				ND				ND				replicative DNA helicase	Essential
VC0372	alr	ND			1	ND			3	ND				ND				ND				ND				alanine racemase	Essential
VC0373		0.90744	0.235667	0.04914	23	0.874573	0.226539	0.0420673	29	0.971421	0.207563	0.0361321	33	0.978815	0.184371	0.0320948	33	0.941051	0.31812	0.0553775	33	0.841788	0.347697	0.0587715	35	hypothetical protein
VC0374	pgi	0.508996	0.410319	0.0538776	58	0.697077	0.417253	0.0455261	84	0.35135	0.414503	0.0647346	42	0.145382	0.315893	0.0451275	49	0.0716899	0.250712	0.0304033	71	0.206711	0.394167	0.139359	8	glucose-6-phosphate isomerase
VC0375		1.01436	0.0990897	0.0374524	7	0.881621	0.244007	0.0704389	12	ND			4	0.97911	0.0692603	0.0261779	7	1.06807	0.129863	0.0347073	14	0.789616	0.395822	0.161594	6	hypothetical protein
VC0376		0.958602	0.197339	0.0176505	125	0.93598	0.175181	0.0148586	139	0.963906	0.137371	0.0119566	135	0.97103	0.151501	0.0128502	140	1.05635	0.152001	0.0116579	172	0.99928	0.244003	0.0182377	182	hypothetical protein
VC0377		0.880111	0.218244	0.0455069	23	0.940826	0.0866743	0.0158245	30	0.937893	0.293146	0.0598383	24	0.915939	0.267879	0.0506244	28	1.07601	0.118144	0.018451	41	1.0201	0.156144	0.0280442	31	hypothetical protein
VC0378		0.864407	0.188792	0.0370252	26	0.907622	0.167329	0.0322025	27	0.843891	0.277465	0.0475848	34	0.835754	0.298839	0.0512505	34	0.62353	0.371586	0.0602792	38	0.742641	0.364236	0.0590869	38	zinc uptake regulation protein, putative
VC0379		0.914125	0.245297	0.0350424	49	0.898388	0.213312	0.0256797	69	0.924054	0.263509	0.0361958	54	0.889479	0.276521	0.0348384	63	1.00102	0.236485	0.0267766	78	0.917949	0.313035	0.037685	69	tRNA-dihydrouridine synthase A
VC0380		ND			1	ND				ND				ND				ND				ND			1	hypothetical protein
VC0381		0.936809	0.117068	0.0292671	16	0.951994	0.119866	0.0282527	18	0.937324	0.200926	0.0449284	20	0.969883	0.109535	0.0244928	20	0.769872	0.369015	0.0753249	24	0.867503	0.357991	0.0800492	20	hypothetical protein
VC0382		ND				ND				ND				ND				ND				ND				hypothetical protein	Essential
VC0383		0.985771	0.116471	0.0300726	15	0.887789	0.314396	0.0721273	19	0.87685	0.311213	0.0803549	15	1.00237	0.0972454	0.0223096	19	1.07369	0.0853975	0.0186353	21	1.06935	0.171166	0.0427916	16	hypothetical protein
VC0384		0.908065	0.236978	0.0244424	94	0.845666	0.328466	0.0284816	133	0.874346	0.292594	0.0264902	127	0.93784	0.243033	0.0213979	132	0.8815	0.3864	0.0298114	176	0.875483	0.373606	0.0331522	129	sulfite reductase (NADPH) flavoprotein alpha-component
VC0385		0.937269	0.221124	0.0233085	90	0.9261	0.188567	0.0181448	108	0.924108	0.230583	0.0234121	97	0.90015	0.289675	0.0294121	98	0.931681	0.3019	0.0279107	120	0.867762	0.365239	0.0354751	107	sulfite reductase subunit beta
VC0386		0.947425	0.140218	0.0187375	56	0.917703	0.14147	0.016122	77	0.925346	0.262815	0.0342156	61	0.96761	0.204168	0.024943	68	0.964185	0.297415	0.0300435	102	0.926527	0.340504	0.0409918	69	phosphoadenosine phosphosulfate reductase
VC0387		0.96063	0.179611	0.0678867	7	0.949712	0.111104	0.0370348	9	0.96322	0.119184	0.0533007	5	ND			3	0.906493	0.314547	0.0994686	10	ND			4	hypothetical protein
VC0388		ND				ND				ND				ND				ND				ND				hypothetical protein	Essential
VC0389		0.983226	0.104695	0.0165537	40	0.915226	0.183878	0.0271113	46	0.954823	0.187492	0.0276441	46	0.936409	0.224875	0.0324579	48	0.703748	0.399598	0.0507489	62	0.869142	0.38843	0.0510034	59	Na+/H+ antiporter, putative
VC0390	metH	0.94802	0.174453	0.0123049	202	0.920392	0.200983	0.0126357	254	0.941902	0.210249	0.0145085	217	0.961332	0.182462	0.0121372	229	0.987871	0.235009	0.0136137	313	0.90634	0.32787	0.0207363	257	B12-dependent methionine synthase
VC0391		0.924012	0.242309	0.0252624	92	0.912665	0.191555	0.0181002	112	0.871275	0.247164	0.0272947	83	0.892207	0.269561	0.0279522	93	1.01405	0.200648	0.0181658	126	0.916217	0.292442	0.0288152	105	aspartate kinase III
VC0392		0.915277	0.244454	0.0326665	56	0.931477	0.222881	0.0268318	69	0.878856	0.260675	0.0372393	50	0.896109	0.28828	0.0375309	59	0.890365	0.400012	0.0428858	88	0.94671	0.318026	0.0441023	52	aminotransferase, class V
VC0393		0.95472	0.192972	0.0152558	161	0.952025	0.19992	0.0141013	202	0.917086	0.184096	0.0160235	134	0.940816	0.181467	0.0147675	153	1.04234	0.222825	0.014855	230	0.902828	0.292268	0.022549	168	hypothetical protein
VC0394	uvrA	0.903373	0.244516	0.0172041	204	0.931954	0.184329	0.011658	251	0.891915	0.248073	0.0165751	231	0.915575	0.227286	0.0147638	244	0.958559	0.255485	0.0148498	310	0.910338	0.332624	0.0219326	236	excinuclease ABC subunit A
VC0395		0.846275	0.273293	0.035282	60	0.841532	0.268338	0.0305799	77	0.181063	0.327049	0.0372707	78	0.113796	0.284476	0.0314151	83	0.336276	0.404795	0.0415311	98	0.867932	0.196832	0.0568205	12	UTP--glucose-1-phosphate uridylyltransferase
VC0396		0.963072	0.17779	0.0256618	48	0.905665	0.232007	0.0279304	69	0.897467	0.209085	0.02872	53	0.914282	0.264371	0.0347136	58	0.963392	0.266535	0.0294339	83	0.980563	0.294957	0.0352541	70	LuxR family transcriptional regulator
VC0397		ND				ND				ND				ND				ND				ND				single-strand DNA-binding protein	Essential
VC0398		0.956628	0.191369	0.0187652	104	0.917131	0.19745	0.0175209	127	0.902098	0.247491	0.0240385	108	0.959254	0.17677	0.0169315	111	1.04202	0.226999	0.0182921	158	1.06774	0.219864	0.0195098	128	regulatory protein CsrD
VC0399		0.895868	0.253218	0.0274653	85	0.929697	0.201827	0.0189862	113	0.91401	0.270004	0.0287825	89	0.967815	0.18739	0.0191254	98	0.937963	0.279964	0.0234118	147	0.883986	0.374573	0.0353938	112	MSHA biogenesis protein MshI
VC0400		0.950487	0.159322	0.0356254	20	0.885539	0.200116	0.0408485	24	0.977307	0.0527914	0.00963835	30	0.991596	0.151004	0.0271211	31	0.890487	0.29015	0.0505086	33	0.907335	0.291546	0.043461	45	MSHA biogenesis protein MshJ
VC0401		0.883462	0.147051	0.0393009	14	0.895487	0.128406	0.0370677	12	0.908736	0.315723	0.0705978	20	0.957145	0.25241	0.0594937	18	0.95279	0.215214	0.0596896	13	0.924047	0.315329	0.0672283	22	MSHA biogenesis protein MshK
VC0402		0.890865	0.214558	0.0218983	96	0.937764	0.157639	0.0144507	119	0.939239	0.196239	0.0174134	129	0.959071	0.214646	0.0187537	133	0.912239	0.264038	0.0212081	157	0.937741	0.281234	0.0222335	161	MSHA biogenesis protein MshL
VC0403		0.906422	0.221065	0.0292807	57	0.972553	0.101641	0.0115086	78	0.989882	0.105598	0.0169093	40	0.914174	0.29694	0.0400394	55	0.839297	0.363604	0.038116	93	0.931592	0.35008	0.0451951	60	MSHA biogenesis protein MshM
VC0404		0.901708	0.185121	0.0210965	77	0.913052	0.220919	0.02355	88	0.971592	0.151358	0.0159546	91	1.01974	0.0847495	0.00860501	97	0.864915	0.266617	0.0256552	109	0.976672	0.276528	0.0257863	116	MSHA biogenesis protein MshN
VC0405		0.901201	0.168494	0.0243201	48	0.922932	0.163553	0.0220534	55	0.934317	0.209531	0.0266105	62	0.975684	0.116656	0.0150602	60	0.874617	0.315463	0.0371777	72	0.918734	0.264009	0.0300867	78	MSHA biogenesis protein MshE
VC0406		0.892253	0.199252	0.0228558	76	0.933176	0.175873	0.0177658	98	0.923464	0.263136	0.0274338	94	0.956113	0.234036	0.0230603	104	0.968096	0.165161	0.015077	122	0.976153	0.261359	0.0248071	112	MSHA biogenesis protein MshG
VC0407		0.965216	0.0904658	0.0202288	20	0.946385	0.121419	0.0264958	21	0.990227	0.0690383	0.013047	28	1.01251	0.0732958	0.0138516	28	0.919651	0.220002	0.0469045	22	0.988115	0.188541	0.0314235	36	MSHA biogenesis protein MshF
VC0408		0.962917	0.05842	0.0156134	14	0.94602	0.0833714	0.0173841	23	1.00276	0.0891142	0.0185816	23	0.992016	0.208307	0.0393662	28	0.908344	0.26681	0.0464457	33	0.930056	0.300245	0.055754	29	MSHA pilin protein MshB
VC0409		0.973247	0.0860627	0.0183486	22	0.947994	0.111296	0.021033	28	0.929774	0.215918	0.0460339	22	1.00352	0.0950529	0.0190106	25	0.953212	0.134412	0.0227197	35	0.92476	0.351285	0.0641356	30	MSHA pilin protein MshA
VC0410		0.914005	0.165093	0.0261035	40	0.926902	0.139566	0.0205779	46	0.991748	0.0987921	0.0130853	57	0.986061	0.173256	0.0229483	57	0.925292	0.29377	0.0358897	67	0.904848	0.285324	0.0343489	69	MSHA pilin protein MshC
VC0411		0.947047	0.123517	0.0195297	40	0.94434	0.143873	0.0188914	58	1.0001	0.12265	0.0184902	44	0.9924	0.135759	0.0184745	54	0.946133	0.272303	0.0306364	80	1.00178	0.218703	0.0267188	67	MSHA pilin protein MshD
VC0412		0.906206	0.142149	0.0191673	55	0.947091	0.0861731	0.0100858	73	0.948701	0.177221	0.0253174	49	0.982499	0.153579	0.0196637	61	0.887611	0.315495	0.0327153	96	0.937084	0.342043	0.0394957	75	hypothetical protein
VC0413		0.875305	0.271165	0.0521856	27	0.953925	0.124371	0.0216502	33	0.935316	0.269638	0.0462425	34	0.992586	0.135822	0.0229582	35	0.897381	0.233007	0.0377987	38	0.946957	0.247715	0.0357546	48	hypothetical protein
VC0414		0.920054	0.16511	0.00948534	305	0.937572	0.138712	0.00734143	358	0.968712	0.133473	0.0071549	359	1.00813	0.0965097	0.00503777	372	0.94159	0.236029	0.0111389	473	0.975386	0.277646	0.0129736	473	hypothetical protein
VC0415		ND				ND				ND				ND				ND				ND				rod shape-determining protein MreB	Essential
VC0416		ND				ND				ND				ND				ND				ND				rod shape-determining protein MreC	Essential
VC0417		ND			1	ND			1	ND				ND				ND				ND				rod shape-determining protein MreD	Essential
VC0418	maf	0.953857	0.121913	0.0295682	17	0.936698	0.167361	0.0356814	22	0.900938	0.127315	0.0367528	12	0.817631	0.316438	0.0791095	16	0.622371	0.481409	0.0982672	24	1.00235	0.324185	0.0977455	11	Maf-like protein
VC0419		0.887126	0.249379	0.0293896	72	0.864299	0.272957	0.0287722	90	0.778983	0.326124	0.0392608	70	0.741076	0.363101	0.0416505	76	0.457269	0.434603	0.0430321	103	0.794663	0.443678	0.0558981	64	ribonuclease G
VC0420		0.956309	0.186158	0.0141944	173	0.975036	0.12616	0.00837351	227	0.867534	0.276611	0.0192258	214	0.919032	0.248414	0.0169813	221	0.848039	0.318008	0.0188703	302	0.826735	0.352741	0.0245766	210	hypothetical protein
VC0421		0.967335	0.106471	0.0160512	44	0.909669	0.192658	0.0269775	51	0.972842	0.171434	0.0285723	36	1.00895	0.0601778	0.0100296	36	0.880514	0.352265	0.0462547	58	0.909308	0.257879	0.034157	57	hypothetical protein
VC0422		0.939479	0.124149	0.015767	62	0.958428	0.145842	0.0158187	85	1.01396	0.175437	0.021433	68	1.00638	0.165059	0.0190593	75	0.939779	0.280206	0.026477	116	0.927989	0.288592	0.0313022	85	tldD protein
VC0423		0.813116	0.365747	0.0539264	46	0.865964	0.278297	0.0378714	54	0.91924	0.227936	0.0396786	33	0.971522	0.161877	0.0259211	39	0.68016	0.480627	0.066651	53	1.05102	0.122237	0.0180229	46	arginine deiminase
VC0424		0.842757	0.225724	0.0564311	16	0.610975	0.421476	0.0942449	20	0.916384	0.240298	0.0524374	21	0.797843	0.401156	0.0897013	20	0.741829	0.458346	0.0977197	22	0.894637	0.329365	0.0798827	17	hypothetical protein
VC0425		0.952358	0.176179	0.0289636	37	0.919141	0.168071	0.0240102	49	0.951657	0.13313	0.0207914	41	0.935281	0.233298	0.0351711	44	0.916789	0.35388	0.0464668	58	0.969541	0.288333	0.0385301	56	hypothetical protein
VC0426		1.01284	0.0472913	0.0131163	13	0.967264	0.098228	0.0253624	15	1.00662	0.0433594	0.00994734	19	0.98364	0.0782032	0.0184327	18	1.06883	0.158489	0.0345852	21	0.905737	0.268563	0.051685	27	hypothetical protein
VC0427		ND			1	ND			1	0.769605	0.392284	0.175435	5	0.992545	0.104507	0.0467369	5	ND			2	ND			3	hypothetical protein
VC0428		0.940507	0.25648	0.0641201	16	0.953605	0.124834	0.0302768	17	0.955241	0.180871	0.0341814	28	0.97187	0.198137	0.0388579	26	1.12009	0.128727	0.0262762	24	1.00002	0.177893	0.0296489	36	hypothetical protein
VC0429		0.959339	0.18126	0.0153193	140	0.924745	0.229954	0.0184703	155	0.960205	0.126826	0.0101218	157	0.96714	0.147758	0.0119847	154	1.04336	0.163671	0.0124437	175	0.965417	0.247805	0.0180252	192	hypothetical protein
VC0430		0.870891	0.228216	0.0307726	55	0.872785	0.203117	0.0225685	81	0.742401	0.377267	0.0499702	59	0.797811	0.347762	0.0421724	69	0.984218	0.346341	0.0349857	102	0.888677	0.441347	0.0579517	58	immunogenic protein
VC0431		0.755537	0.364743	0.0729486	25	0.939252	0.165642	0.0279987	35	0.716558	0.344288	0.061836	31	0.667454	0.414785	0.0691308	36	0.66528	0.555562	0.079366	49	0.734712	0.433715	0.0834685	27	arginine repressor
VC0432		0.872496	0.248303	0.0258874	92	0.825358	0.267749	0.0249677	115	0.716497	0.278971	0.0295708	90	0.678309	0.386224	0.0396257	96	0.192171	0.342392	0.0305027	131	0.38188	0.422755	0.0501718	72	malate dehydrogenase
VC0433		0.933387	0.206999	0.0201055	106	0.978027	0.165264	0.0144946	130	0.91445	0.22905	0.0222473	106	0.924292	0.239773	0.0236255	105	0.919652	0.284534	0.0224244	165	0.963291	0.373893	0.0350183	114	arginine/ornithine antiporter
VC0434		ND			2	ND			1	ND			2	ND			2	ND			2	ND				octaprenyl-diphosphate synthase
VC0435	rplU	ND				ND				ND				ND				ND				ND				50S ribosomal protein L21	Essential
VC0436	rpmA	ND				ND				ND				ND				ND				ND				50S ribosomal protein L27	Essential
VC0437	obgE	ND				ND				ND				ND				ND				ND				GTPase ObgE	Essential
VC0438		0.951879	0.23902	0.0436388	30	0.962145	0.148027	0.0234052	40	0.956014	0.243404	0.0507532	23	0.964427	0.224986	0.0441234	26	0.907881	0.331015	0.0482836	47	1.07576	0.227064	0.041456	30	hypothetical protein
VC0439		1.00375	0.119474	0.0267152	20	0.965958	0.107605	0.021103	26	0.944823	0.0699491	0.0201926	12	0.929362	0.113998	0.0284995	16	1.04277	0.203811	0.0434527	22	0.975269	0.252856	0.0580091	19	hypothetical protein
VC0440		ND				ND				ND				ND				ND				ND				dihydrofolate reductase	Essential
VC0441	apaH	0.894983	0.235428	0.0363274	42	0.821308	0.297901	0.0398087	56	0.582279	0.380311	0.0601324	40	0.578161	0.398083	0.0614255	42	0.450953	0.441105	0.0542963	66	0.425624	0.464517	0.119938	15	diadenosine tetraphosphatase
VC0442	apaG	0.96975	0.0645222	0.0144276	20	0.933721	0.158145	0.0337167	22	0.912515	0.161088	0.031592	26	0.898118	0.264802	0.0540525	24	0.91938	0.360198	0.0617734	34	0.924504	0.313863	0.0593145	28	ApaG
VC0443	ksgA	ND				ND				ND				ND				ND				ND				dimethyladenosine transferase	Essential
VC0444	pdxA	ND				ND				ND				ND				ND				ND				4-hydroxythreonine-4-phosphate dehydrogenase	Essential
VC0445		ND				ND				ND				ND				ND				ND				survival protein SurA	Essential
VC0446		ND			2	ND			4	ND			2	ND			3	0.0559599	0.091484	0.0373482	6	ND				organic solvent tolerance protein
VC0447	djlA	0.933383	0.251719	0.052487	23	0.905996	0.248402	0.0529595	22	0.919421	0.228073	0.0365209	39	0.95628	0.213936	0.035656	36	1.00863	0.221807	0.0398378	31	0.953504	0.290759	0.0484598	36	DNA-J like membrane chaperone protein
VC0448		ND			2	ND			4	ND			2	ND			3	1.02076	0.0584504	0.0238623	6	ND			3	hypothetical protein
VC0449		0.959056	0.135638	0.0155588	76	0.916341	0.191192	0.0203812	88	0.860746	0.330822	0.0360957	85	0.865425	0.330531	0.0350363	90	1.00447	0.251636	0.0239925	114	0.964072	0.329691	0.0351452	89	methyl-accepting chemotaxis protein
VC0450		0.905949	0.241887	0.0356643	46	0.92039	0.254718	0.0315939	65	0.761673	0.318686	0.0554761	34	0.884047	0.238596	0.0359697	44	0.953034	0.276029	0.0308609	80	0.895206	0.456764	0.0783344	34	membrane-bound lytic murein transglycosylase C
VC0451		1.01677	0.164514	0.0520237	10	0.959257	0.13095	0.0349978	14	0.742481	0.356093	0.0987624	13	0.878181	0.361395	0.0903488	16	0.89976	0.339757	0.0779456	19	0.842778	0.329432	0.0993274	11	hypothetical protein
VC0452		0.956495	0.150216	0.0126504	141	0.937176	0.193716	0.0148138	171	0.939053	0.20534	0.0171117	149	0.978174	0.119233	0.00957705	156	1.00747	0.205717	0.0139329	226	0.975682	0.260994	0.0188356	196	A/G-specific adenine glycosylase
VC0453	trmB	0.906801	0.200707	0.0256979	61	0.935108	0.132765	0.0149372	79	0.999169	0.11413	0.0158269	52	1.00435	0.0878538	0.0112485	61	0.836443	0.336546	0.0354751	92	1.01931	0.247811	0.029833	69	tRNA (guanine-N(7))-methyltransferase
VC0454		0.929443	0.221899	0.041935	28	0.915756	0.224643	0.0369311	37	0.852312	0.354311	0.0657939	29	0.897109	0.303128	0.0535859	32	0.920723	0.326514	0.0486738	45	1.01493	0.266852	0.0471732	32	glutaminase
VC0455		0.882125	0.333804	0.0541502	38	0.897397	0.241802	0.0368745	43	0.866004	0.339419	0.0573723	35	0.929852	0.279899	0.0454057	38	0.666891	0.472063	0.0681365	48	0.849473	0.373769	0.0622948	36	coproporphyrinogen III oxidase
VC0456		0.923234	0.100201	0.0258717	15	0.848554	0.280003	0.0776589	13	0.917627	0.154444	0.0329275	22	0.897002	0.274963	0.0630809	19	0.837017	0.418201	0.111769	14	0.994454	0.198525	0.0433217	21	putative deoxyribonucleotide triphosphate pyrophosphatase
VC0457		0.915901	0.166671	0.0355344	22	0.965629	0.207794	0.0399899	27	0.978106	0.0870445	0.012834	46	0.943224	0.234381	0.0349395	45	0.879394	0.364987	0.0577096	40	0.989618	0.277142	0.0388077	51	hypothetical protein
VC0458		0.745811	0.362206	0.0968037	14	0.81737	0.280762	0.0724924	15	0.938039	0.169317	0.0564392	9	0.961709	0.207357	0.0691191	9	1.00669	0.325591	0.0840671	15	0.959559	0.336532	0.0971486	12	hypothetical protein
VC0459		0.872061	0.288363	0.0526476	30	0.85707	0.319217	0.0539575	35	0.816764	0.333867	0.0581188	33	0.891426	0.304029	0.0513903	35	0.727896	0.403922	0.0630821	41	0.758204	0.397351	0.0691698	33	hypothetical protein
VC0460		0.770409	0.275537	0.0530272	27	0.769097	0.255807	0.0409619	39	0.668817	0.365841	0.0717474	26	0.697835	0.415154	0.0733896	32	0.360081	0.444135	0.0685315	42	0.496965	0.492272	0.131565	14	pyrroline-5-carboxylate reductase
VC0461		0.925357	0.183338	0.0293576	39	0.906975	0.199164	0.0255003	61	0.84392	0.285885	0.0446477	42	0.949555	0.150109	0.0210195	51	0.842434	0.321841	0.0369177	77	0.741971	0.43317	0.0600698	52	hypothetical protein
VC0462		0.928067	0.156187	0.0225436	48	0.904236	0.183399	0.0267516	47	0.925476	0.209239	0.0244895	73	0.95961	0.214969	0.0268711	65	0.950808	0.245222	0.0297375	68	0.869993	0.3648	0.0413054	78	twitching motility protein PilT
VC0463		0.984881	0.147362	0.0222157	44	0.957823	0.158853	0.0226933	49	0.91803	0.203414	0.0303232	45	0.951561	0.204897	0.0302104	46	0.943327	0.350919	0.0456858	59	0.999826	0.323967	0.0458159	50	twitching motility protein PilT
VC0464		0.926233	0.224508	0.0257529	76	0.934685	0.236589	0.0244023	94	0.945407	0.234302	0.0244277	95	0.944707	0.219775	0.0226681	95	0.995366	0.240208	0.0223995	119	0.997366	0.272772	0.026877	103	LuxR family transcriptional regulator
VC0465		0.977455	0.140094	0.0147672	90	0.965957	0.16777	0.0155771	116	0.959272	0.177807	0.0173522	106	0.960276	0.139995	0.013348	112	0.993812	0.275506	0.0227233	152	0.981162	0.261603	0.0226839	135	tyrosyl-tRNA synthetase
VC0466		ND				ND				ND				ND				ND				ND				Holliday junction resolvase-like protein	Essential
VC0467		0.946974	0.0875161	0.0233896	14	0.930042	0.0818885	0.0204721	16	0.80074	0.27236	0.0609015	20	0.814493	0.302413	0.0693782	19	0.998604	0.186408	0.0406775	21	1.00712	0.208314	0.0556743	14	hypothetical protein
VC0468		0.49651	0.420052	0.0808391	27	0.356349	0.427313	0.0693193	38	0.317641	0.451144	0.0984476	21	0.124176	0.311146	0.0713818	19	0.109925	0.326888	0.0906625	13	ND			1	glutathione synthetase
VC0469		0.960622	0.280406	0.0627006	20	0.826685	0.325639	0.0679004	23	0.835594	0.387063	0.0790088	24	0.81691	0.412136	0.0808265	26	0.660634	0.482926	0.0912644	28	0.882501	0.375613	0.0766717	24	hypothetical protein
VC0470		0.973212	0.149711	0.020373	54	0.93703	0.150949	0.0188687	64	0.928203	0.231637	0.0278858	69	0.962961	0.20412	0.024397	70	1.00798	0.183508	0.0213324	74	0.969462	0.280519	0.0299034	88	extracellular deoxyribonuclease
VC0471		0.993531	0.0748947	0.0118419	40	0.966026	0.0705411	0.00997602	50	0.971276	0.14664	0.0209486	49	0.939955	0.269929	0.0374324	52	0.996132	0.229663	0.0280577	67	0.990509	0.246121	0.0307652	64	hypothetical protein
VC0472		ND				ND				ND				ND				ND				ND				S-adenosylmethionine synthetase	Essential
VC0473		0.985198	0.157349	0.0102426	237	0.958108	0.161971	0.00921422	311	0.950985	0.165314	0.0109482	235	0.977516	0.133951	0.00842146	259	1.00386	0.215673	0.0113512	374	0.99624	0.250771	0.0151496	280	transketolase
VC0474		0.95862	0.148097	0.0172159	74	0.920045	0.18799	0.0194937	93	0.947368	0.199597	0.020266	99	0.943504	0.216746	0.0213566	104	1.01777	0.270043	0.0235938	134	0.944242	0.353452	0.0338546	110	iron-regulated virulence regulatory protein IrgB
VC0475		0.94798	0.189415	0.0153133	154	0.950063	0.191104	0.0139749	188	0.958149	0.180128	0.0134259	183	0.980814	0.147097	0.0108441	186	1.03934	0.167292	0.011055	234	0.996911	0.229866	0.0156767	221	enterobactin receptor protein
VC0476		0.921015	0.229241	0.0314886	53	0.922825	0.187384	0.0237978	62	0.780403	0.309447	0.036986	71	0.765711	0.353209	0.0419181	71	0.877504	0.302194	0.0325864	87	0.796111	0.344311	0.0468548	54	erythrose 4-phosphate dehydrogenase
VC0477	pgk	ND				ND				ND				ND				ND				ND				phosphoglycerate kinase	Essential
VC0478		ND				ND				ND				ND				ND				ND				fructose-bisphosphate aldolase	Essential
VC0479		ND				ND				ND				ND				ND				ND				hypothetical protein	Essential
VC0480		0.918592	0.227489	0.031547	52	0.940716	0.186792	0.023349	64	0.853551	0.333667	0.0467227	52	0.919226	0.273219	0.0352724	60	0.962219	0.298426	0.0327566	83	0.884701	0.378634	0.0515255	54	hypothetical protein
VC0481		0.932014	0.153473	0.0383682	16	0.828282	0.343896	0.0834071	17	0.982357	0.238942	0.0498228	23	0.987935	0.168434	0.037663	20	0.995973	0.243287	0.0468206	27	0.987507	0.147677	0.0307928	23	LysE/YggA family protein
VC0482		0.944087	0.171286	0.0255338	45	0.920921	0.231249	0.0296085	61	0.941661	0.139668	0.0191849	53	0.965919	0.205185	0.0271774	57	0.99957	0.195531	0.021861	81	1.00862	0.26883	0.0321313	70	chromosome replication initiation inhibitor protein
VC0483		1.03102	0.0994506	0.0153456	42	0.982174	0.163263	0.0235649	48	0.928063	0.192719	0.0293894	43	0.98463	0.130029	0.0193835	45	0.906795	0.320901	0.0398028	65	1.01735	0.268905	0.0392238	47	hypothetical protein
VC0484		1.01175	0.132737	0.05017	7	0.998712	0.0416814	0.0138938	9	1.07388	0.145553	0.0485177	9	1.0736	0.0794902	0.0264967	9	0.990789	0.105677	0.0318628	11	0.895933	0.24347	0.0734089	11	hypothetical protein
VC0485		0.196531	0.346752	0.122595	8	0.531375	0.432162	0.11986	13	ND			3	ND			3	0.165988	0.384309	0.145255	7	ND				pyruvate kinase
VC0486		1.0001	0.0727658	0.0230106	10	0.818904	0.33338	0.117868	8	0.948356	0.242241	0.055574	19	0.939779	0.260872	0.0673568	15	1.09516	0.223854	0.062086	13	0.943481	0.288303	0.0644664	20	DeoR family transcriptional regulator
VC0487		ND				ND				ND				ND				ND				ND				D-fructose-6-phosphate amidotransferase	Essential
VC0488		0.982802	0.183654	0.0221093	69	0.936358	0.195137	0.0215492	82	0.985287	0.156184	0.0175721	79	0.99371	0.0873577	0.00976689	81	1.02087	0.257156	0.0257156	100	0.959657	0.303482	0.0294768	107	extracellular solute-binding protein, putative
VC0489		0.915042	0.229564	0.0272443	71	0.920321	0.195638	0.0208551	88	0.975321	0.203263	0.0204287	100	1.00544	0.113293	0.0114443	98	1.03138	0.22394	0.0207923	117	0.986688	0.279272	0.0251811	124	hemolysin, putative
VC0490		0.942915	0.189368	0.0106866	315	0.964359	0.128793	0.00656392	387	0.957839	0.208101	0.0111235	362	0.982577	0.167008	0.00868235	380	1.02953	0.203511	0.00913794	513	0.985772	0.290041	0.0142376	428	hypothetical protein
VC0491		0.944179	0.187981	0.017019	122	0.951858	0.160043	0.0132001	147	0.980677	0.0991525	0.0083207	143	0.97723	0.134279	0.0108558	153	1.04304	0.178715	0.0128642	197	1.01529	0.237032	0.0176185	184	hypothetical protein
VC0492		0.953224	0.191841	0.0159867	144	0.938319	0.204285	0.0150193	185	0.970564	0.136038	0.0111447	153	0.996473	0.153862	0.0118356	172	1.04152	0.199745	0.0133163	233	0.999658	0.25149	0.0178277	205	hypothetical protein
VC0493		0.98368	0.0626995	0.011643	29	0.929782	0.169703	0.0299995	32	0.948269	0.186756	0.0266794	49	0.926259	0.239829	0.0357517	45	0.901639	0.367946	0.0525638	49	0.992055	0.274059	0.038376	51	hypothetical protein
VC0494		0.967206	0.124522	0.0163505	58	0.935104	0.134176	0.016516	66	0.98568	0.12442	0.0135753	86	0.955676	0.205475	0.0229728	81	1.00627	0.278305	0.0296674	88	0.955451	0.268948	0.0271679	98	hypothetical protein
VC0495		0.967104	0.100681	0.0146859	47	0.956621	0.103997	0.0132077	62	0.985492	0.0785602	0.00932338	72	0.982099	0.174893	0.0199309	77	1.04788	0.167263	0.0177299	90	1.02121	0.156058	0.0162702	92	hypothetical protein
VC0496		0.97969	0.116182	0.0181445	41	0.938099	0.17748	0.024612	52	0.934492	0.248091	0.0358088	49	0.930317	0.263943	0.0362554	53	1.02659	0.160448	0.0196018	67	0.992991	0.268448	0.0340929	62	hypothetical protein
VC0497		0.989227	0.10086	0.0215034	22	0.945794	0.179297	0.0345058	27	0.897774	0.249436	0.0509159	24	0.919549	0.264463	0.0508958	27	0.891265	0.384547	0.0608022	40	1.07523	0.255749	0.0445201	33	transcriptional regulator
VC0498		1.00533	0.0696829	0.0210102	11	0.875784	0.287202	0.095734	9	0.937497	0.208893	0.0417786	25	0.95662	0.125443	0.0267446	22	0.993839	0.300348	0.0689046	19	0.987696	0.172882	0.0310506	31	ribonuclease H
VC0499		0.961362	0.197278	0.0239235	68	0.934629	0.234519	0.0258983	82	0.985494	0.179474	0.0264619	46	1.00521	0.163592	0.0224711	53	0.995287	0.25303	0.0290245	78	1.01783	0.165851	0.019823	71
VC0500		0.959568	0.0924135	0.0212011	19	0.954195	0.101381	0.0202762	25	0.897153	0.291298	0.0492383	35	0.932661	0.202162	0.0341717	35	0.963628	0.26294	0.0432271	37	1.04421	0.178489	0.0285811	39
VC0501		1.00445	0.143883	0.0216911	44	0.957353	0.187785	0.0253209	55	0.957576	0.165873	0.023458	50	0.964185	0.224471	0.0308335	53	0.944128	0.293705	0.0353579	69	1.00293	0.235098	0.0317006	55
VC0502		1.00209	0.09715	0.0169116	33	0.915159	0.192623	0.0312475	38	0.986247	0.157678	0.0262797	36	0.988319	0.151929	0.0253216	36	0.989164	0.267718	0.037861	50	0.982389	0.290936	0.0448924	42	type IV pilin, putative
VC0503		0.962429	0.232203	0.0338703	47	0.928411	0.272475	0.0374274	53	0.889488	0.291282	0.0385813	57	0.914408	0.276817	0.0360385	59	0.996956	0.238341	0.0297926	64	0.938845	0.29952	0.0389942	59	hypothetical protein
VC0504		1.03928	0.0764088	0.0254696	9	0.948127	0.162447	0.0434159	14	0.823037	0.352809	0.094292	14	0.91761	0.276074	0.0737839	14	0.984654	0.333788	0.0728386	21	0.952225	0.31466	0.074166	18	hypothetical protein
VC0505		0.931944	0.16861	0.0285004	35	0.955938	0.213629	0.0361099	35	0.949812	0.144228	0.0187769	59	0.966452	0.189299	0.0260022	53	0.971391	0.287345	0.0402364	51	1.01485	0.248665	0.0303793	67	hypothetical protein
VC0506		0.984061	0.151333	0.0302666	25	0.959727	0.214004	0.0411852	27	0.911381	0.22246	0.0370766	36	0.940164	0.307413	0.0543435	32	1.01821	0.198149	0.0317292	39	0.883376	0.357785	0.0613596	34	hypothetical protein
VC0507		1.01705	0.0544197	0.0157096	12	0.988217	0.0758074	0.0165425	21	0.89704	0.287939	0.07986	13	1.02836	0.0793318	0.0186987	18	1.06149	0.1042	0.0193494	29	1.08372	0.2212	0.0482699	21	hypothetical protein
VC0508		0.945712	0.210461	0.0360938	34	0.852139	0.384339	0.062348	38	0.945536	0.225495	0.0291113	60	0.955468	0.236952	0.0311134	58	1.00162	0.21488	0.0320323	45	1.00165	0.192219	0.0256864	56	hypothetical protein
VC0509		0.986443	0.102493	0.0160066	41	0.952947	0.127216	0.0169999	56	0.94286	0.230511	0.0407489	33	0.95425	0.187283	0.0292487	41	0.969723	0.254307	0.0310685	67	1.01641	0.241029	0.0351576	47	hypothetical protein
VC0510		0.978127	0.0767176	0.0142461	29	0.947855	0.0828865	0.012221	46	0.985873	0.111214	0.0218109	26	0.964391	0.181416	0.0302359	36	0.982739	0.294502	0.0390077	57	1.00502	0.320746	0.0520319	38	DNA repair protein RadC-related protein
VC0511		1.03356	0.0601793	0.0212766	8	1.06572	0.225094	0.0750313	9	ND			4	1.02849	0.0175574	0.00785192	5	1.01492	0.0643579	0.0227539	8	0.784821	0.435023	0.194548	5	hypothetical protein
VC0512		0.913847	0.247469	0.0228785	117	0.964673	0.15958	0.0136339	137	0.977644	0.165827	0.0147148	129	0.98416	0.160399	0.0141224	130	1.02303	0.2274	0.0174408	174	0.979716	0.310599	0.024403	165	methyl-accepting chemotaxis protein
VC0513		0.963694	0.140643	0.0133493	111	0.939407	0.157397	0.0139668	127	0.944917	0.225448	0.0188529	144	0.982447	0.192323	0.0163126	141	0.989076	0.248562	0.0194689	166	0.969203	0.276886	0.0214905	168	AraC/XylS family transcriptional regulator
VC0514		0.947596	0.189875	0.00938874	411	0.953884	0.142694	0.00643971	494	0.97109	0.16187	0.00773444	452	0.986153	0.157609	0.00730111	480	1.0248	0.208485	0.00856147	622	0.997087	0.224662	0.0095796	558	methyl-accepting chemotaxis protein
VC0515		0.951608	0.197379	0.0122645	260	0.943447	0.187329	0.0105716	315	0.985251	0.13071	0.00778365	287	0.983745	0.14867	0.0086267	302	1.01566	0.171121	0.00859917	407	0.986239	0.254145	0.0133761	369	hypothetical protein
VC0516		0.942694	0.19349	0.0140005	192	0.964535	0.135682	0.00914767	221	0.975598	0.111215	0.00824382	186	0.99254	0.10886	0.0078157	195	1.02422	0.191724	0.0116679	282	1.00215	0.277158	0.0175996	254	phage integrase
VC0517		ND				ND				ND				ND				ND				ND				RNA polymerase sigma factor RpoD	Essential
VC0518	dnaG	0.97843	0.0954897	0.0427043	5	0.94971	0.0623828	0.0220556	8	ND			2	ND			4	0.818036	0.404683	0.134894	9	ND			4	DNA primase
VC0519		ND				ND				ND				ND				ND				ND				hypothetical protein	Essential
VC0520	rpsU	ND				ND				ND			2	ND			2	ND				ND				30S ribosomal protein S21	Essential
VC0521	gcp	ND				ND				ND				ND				ND				ND				O-sialoglycoprotein endopeptidase	Essential
VC0522		0.974501	0.150471	0.0221858	46	0.913823	0.266421	0.0359243	55	0.905795	0.316173	0.0471323	45	0.914788	0.265299	0.0371493	51	0.991585	0.219195	0.0256549	73	0.966266	0.281854	0.0398602	50	beta-ketoadipate enol-lactone hydrolase, putative
VC0523		1.01177	0.0990695	0.0136082	53	0.963025	0.149352	0.0179799	69	0.994453	0.0895159	0.0130572	48	0.987188	0.199298	0.0263977	57	0.972303	0.291433	0.0319889	83	0.982313	0.297015	0.0362861	68	putative glycerol-3-phosphate acyltransferase PlsY
VC0524		ND				ND				ND				ND				ND				ND				dihydroneopterin aldolase FolB, putative	Essential
VC0525		0.953931	0.219099	0.0438198	25	0.938003	0.218339	0.0340988	41	0.90287	0.293128	0.0598344	24	0.97627	0.147216	0.0264407	31	0.4731	0.417737	0.0568468	54	0.748433	0.432633	0.0777033	31	2-amino-4-hydroxy-6- hydroxymethyldihydropteridine pyrophosphokinase
VC0526	uppP	0.976386	0.101013	0.0136206	55	0.967713	0.154521	0.0191659	65	0.909108	0.215077	0.024671	76	0.913597	0.268998	0.0317017	72	0.913172	0.350919	0.0380626	85	0.948098	0.270544	0.0312397	75	undecaprenyl pyrophosphate phosphatase
VC0527	ftsB	ND				ND				ND				ND				ND				ND				cell division protein FtsB	Essential
VC0528	ispD	ND				ND				ND				ND				ND				ND				2-C-methyl-D-erythritol 4-phosphate cytidylyltransferase	Essential
VC0529	ispF	ND				ND				ND				ND				ND				ND				2-C-methyl-D-erythritol 2,4-cyclodiphosphate synthase	Essential
VC0530	truD	0.962153	0.170842	0.0182118	88	0.943887	0.142036	0.0134211	112	0.918421	0.205466	0.0226899	84	0.951678	0.178607	0.0179507	99	0.956259	0.259682	0.0225173	137	0.88978	0.368207	0.0357635	106	tRNA pseudouridine synthase D
VC0531	surE	0.969589	0.110023	0.0207924	28	0.95241	0.0957617	0.0171993	31	0.815237	0.333888	0.0711851	22	0.819111	0.335267	0.0645222	27	0.879356	0.294402	0.0459778	41	0.84326	0.458349	0.0898897	26	stationary phase survival protein SurE
VC0532	pcm	0.933828	0.216654	0.0334305	42	0.911735	0.206997	0.0274175	57	0.589782	0.401437	0.0626939	42	0.544891	0.415513	0.0606089	47	0.868729	0.345829	0.0425686	66	0.814158	0.386233	0.0863643	20	protein-L-isoaspartate O-methyltransferase
VC0533		0.982781	0.215079	0.0348903	38	1.0973	0.137601	0.0205124	45	0.36745	0.333837	0.0590147	32	0.433134	0.356471	0.0620537	33	0.668704	0.566058	0.082568	47	ND			2	lipoprotein NlpD
VC0534		1.05205	0.235075	0.0306042	59	1.16765	0.194927	0.0234664	69	0.940501	0.289491	0.0346008	71	1.01908	0.126411	0.0150023	71	0.707817	0.57319	0.0611023	88	0.835353	0.357774	0.0418743	73	RNA polymerase sigma-38 factor
VC0535		0.943958	0.238048	0.0204124	136	0.948761	0.203143	0.0159114	163	0.945415	0.162168	0.0139572	138	0.974367	0.106607	0.00904226	140	1.02339	0.182114	0.0130081	199	0.944159	0.311402	0.0243164	168	DNA mismatch repair protein
VC0536		0.821088	0.380026	0.109704	12	0.713267	0.39268	0.104948	14	0.855437	0.249495	0.0644194	15	0.859159	0.290618	0.0750373	15	0.832891	0.438863	0.121719	13	1.04489	0.177715	0.0444288	16	hypothetical protein
VC0537	cysM	0.969571	0.186018	0.026574	49	0.928905	0.245391	0.0291226	71	0.942162	0.267393	0.0390033	48	0.953465	0.208889	0.0269675	60	0.92356	0.370482	0.0401844	87	0.934686	0.40328	0.0492685	67	cysteine synthase B
VC0538		0.961663	0.174869	0.0225755	60	0.931219	0.226158	0.0245303	85	0.906761	0.294627	0.0349658	73	0.948978	0.198224	0.0223019	80	0.886303	0.338476	0.0327217	111	0.850952	0.357171	0.0396856	81	thiosulfate ABC transporter, periplasmic thiosulfate-binding protein
VC0539		0.979108	0.111263	0.0148682	56	0.936766	0.220245	0.0263243	70	0.962124	0.184645	0.0275253	45	0.945578	0.201589	0.030742	43	0.92446	0.27778	0.0312527	79	1.03275	0.260988	0.034876	56	sulfate ABC transporter, permease protein
VC0540		0.918426	0.228342	0.0307896	55	0.969616	0.241918	0.0285103	72	0.928023	0.223112	0.0312419	52	0.979817	0.145383	0.0189273	59	0.916942	0.314691	0.0343356	84	0.901463	0.381686	0.0456202	70	sulfate ABC transporter, permease protein
VC0541		0.987167	0.117212	0.0152597	59	0.931846	0.201244	0.0223604	81	0.900003	0.307388	0.040362	59	0.94258	0.225132	0.0279242	65	0.859344	0.344733	0.0350023	100	0.879694	0.340998	0.0413521	68	sulfate ABC transporter, ATP-binding protein
VC0542		0.97562	0.113642	0.0227283	25	0.885507	0.215182	0.0448686	23	0.932344	0.210221	0.03456	37	0.936731	0.285075	0.0503945	32	0.952655	0.314852	0.0574839	30	0.963185	0.304768	0.0475968	41	CinA-related protein
VC0543	recA	0.597424	0.382776	0.0597796	41	0.498788	0.400825	0.0526309	58	0.515655	0.449343	0.0849179	29	0.429233	0.47261	0.0747262	40	0.360265	0.488861	0.0754329	42	0.755764	0.398724	0.14097	8	recombinase A
VC0544	recX	0.99779	0.077093	0.0164363	22	0.957476	0.0747711	0.0141304	28	0.981591	0.17418	0.034836	25	1.02951	0.106075	0.0200462	28	1.02778	0.11709	0.02103	31	0.961401	0.233065	0.0378082	38	recombination regulator RecX
VC0545	alaS	ND				ND				ND				ND				ND				ND				alanyl-tRNA synthetase	Essential
VC0546		0.73835	0.341255	0.139317	6	0.829176	0.0732221	0.0298928	6	0.937795	0.101695	0.038437	7	0.870378	0.316759	0.119724	7	0.247515	0.412403	0.137468	9	0.858109	0.135121	0.0551631	6	hypothetical protein
VC0547		0.556938	0.391296	0.0454873	74	0.710051	0.366887	0.0395624	86	0.725055	0.420472	0.0509897	69	0.760808	0.410183	0.0464441	79	0.013956	0.085612	0.00917857	88	0.681771	0.466488	0.0602233	60	aspartate kinase
VC0548		ND			3	ND			4	ND				ND				ND			2	ND				carbon storage regulator
VC0549		0.959063	0.0668002	0.0222667	9	0.806024	0.23378	0.10455	5	0.98461	0.066089	0.0140902	22	0.91945	0.241447	0.0553917	19	1.08708	0.0490285	0.0155042	10	0.970404	0.258575	0.0480162	29	oxaloacetate decarboxylase subunit gamma
VC0550		0.963794	0.202716	0.0200719	102	0.937316	0.193845	0.0170671	129	0.958712	0.171244	0.0147932	138	0.952567	0.220231	0.0185468	144	1.05307	0.26819	0.0203901	177	0.968809	0.292362	0.0231132	163	pyruvate carboxylase subunit B
VC0551		0.986913	0.213183	0.029283	53	0.96771	0.172958	0.0205264	71	0.950597	0.203379	0.0284788	52	0.932135	0.205854	0.02703	58	0.969547	0.317201	0.0342046	87	0.899848	0.344839	0.0431048	64	oxaloacetate decarboxylase, beta subunit
VC0552		0.981191	0.141763	0.0150269	89	0.966757	0.146357	0.0132505	122	0.969217	0.195467	0.0258902	58	0.991606	0.226453	0.0254779	79	0.990879	0.233513	0.0198063	142	0.992338	0.277143	0.0282858	97	quinone oxidoreductase
VC0553		1.01156	0.0967093	0.0163469	35	0.989536	0.163514	0.0246507	44	0.94788	0.206978	0.0319374	43	0.947814	0.233204	0.0351568	44	1.03484	0.195422	0.0246208	63	0.982369	0.255985	0.0369483	48	hypothetical protein
VC0554		0.970508	0.169992	0.012532	185	0.944838	0.172989	0.011853	214	0.938091	0.184848	0.0134103	192	0.936917	0.201015	0.0141785	206	0.941163	0.263423	0.0165941	263	0.858619	0.340838	0.0219099	248	insulinase family protease/insulinase family protease
VC0555		ND			4	1.05523	0.149703	0.0669491	5	0.963572	0.0584965	0.0261605	5	0.985924	0.10897	0.0444868	6	0.957912	0.107204	0.0479431	5	0.882608	0.238989	0.106879	5	hypothetical protein
VC0556		0.424186	0.409219	0.0573021	51	0.320641	0.432103	0.0516462	70	0.178171	0.286493	0.049872	34	0.0208163	0.114865	0.0179388	41	0.0453153	0.141615	0.0202308	50	ND			2	glutamate--cysteine ligase
VC0557		0.957879	0.0986369	0.027357	13	0.940192	0.122515	0.0339795	13	0.978723	0.184866	0.0343287	29	0.917613	0.199254	0.0383464	27	0.950541	0.369065	0.0825255	20	0.982486	0.282477	0.0484444	34	S-ribosylhomocysteinase
VC0558		0.958843	0.202515	0.0292305	48	0.941402	0.207629	0.0268048	60	0.872948	0.302647	0.0472655	42	0.87899	0.324966	0.0479136	46	1.0469	0.251846	0.0294764	73	0.901832	0.388401	0.053351	53	hemolysin, putative
VC0559		0.844573	0.323763	0.0601212	29	0.926352	0.146405	0.0231486	40	0.907307	0.2066	0.0371065	31	0.959113	0.107991	0.0172924	39	0.828322	0.419366	0.0599094	49	1.01537	0.285393	0.0425439	45	hypothetical protein
VC0560		ND				ND				ND				ND				ND				ND				signal recognition particle protein	Essential
VC0561	rpsP	ND				ND				ND				ND				ND				ND				30S ribosomal protein S16	Essential
VC0562	rimM	ND				ND				ND				ND				ND				ND				16S rRNA-processing protein	Essential
VC0563	trmD	ND				ND				ND				ND				ND				ND				tRNA (guanine-N(1)-)-methyltransferase	Essential
VC0564	rplS	ND				ND				ND				ND				ND				ND				50S ribosomal protein L19	Essential
VC0565		ND				ND			1	ND				ND				ND				ND				protease DegS	Essential
VC0566		0.910959	0.231444	0.0291593	63	0.928956	0.211762	0.0244522	75	0.530254	0.386411	0.043202	81	0.436065	0.41853	0.0465033	82	0.951297	0.278008	0.0278008	101	0.767018	0.445859	0.0858056	27	protease DO
VC0567		0.917037	0.265592	0.0766699	12	1.01149	0.117288	0.0269077	19	0.912073	0.29964	0.090345	11	0.932577	0.119688	0.0299219	16	0.672532	0.410685	0.0805419	26	0.878486	0.390511	0.108308	13	cytochrome d ubiquinol oxidase subunit III
VC0568		0.964801	0.144773	0.0182397	63	0.932149	0.112311	0.012041	87	0.883771	0.225446	0.0275426	68	0.805754	0.313874	0.0360038	76	0.929988	0.301522	0.0292864	110	0.961404	0.352686	0.0451568	61	hypothetical protein
VC0569		ND			4	0.942797	0.0884845	0.0395715	5	ND			3	ND			4	0.908694	0.344649	0.121852	8	ND			2	hypothetical protein
VC0570	rplM	ND				ND				ND				ND				ND				ND				50S ribosomal protein L13	Essential
VC0571	rpsI	ND				ND				ND				ND				ND				ND				30S ribosomal protein S9	Essential
VC0572		ND			3	ND			4	ND				ND			1	ND			3	ND			2	hypothetical protein
VC0573		0.971206	0.156867	0.0435071	13	0.627412	0.403301	0.100825	16	0.806577	0.236511	0.0632102	14	0.700637	0.329918	0.0824795	16	0.339473	0.364057	0.109767	11	0.787435	0.370407	0.0989955	14	ubiquinol--cytochrome c reductase, iron-sulfur subunit
VC0574		0.843257	0.303885	0.0647885	22	0.825927	0.270022	0.0540044	25	0.789986	0.216248	0.0496107	19	0.623796	0.39768	0.091234	19	0.227078	0.405363	0.0810727	25	0.425769	0.491161	0.136223	13	ubiquinol--cytochrome c reductase, cytochrome B
VC0575		0.609712	0.46728	0.176615	7	0.660528	0.383123	0.127708	9	0.891702	0.0534163	0.0238885	5	0.549483	0.41046	0.16757	6	0.244999	0.350742	0.116914	9	ND			3	ubiquinol--cytochrome c reductase, cytochrome c1
VC0576	sspA	0.683471	0.286505	0.101295	8	0.703943	0.443308	0.133662	11	0	X	X	10	0	X	X	13	0	X	X	12	ND				stringent starvation protein A
VC0577		1.10058	0.200483	0.0818466	6	0.928731	0.136256	0.0556263	6	0.982783	0.0477452	0.0168805	8	0.889152	0.151159	0.0503863	9	1.0128	0.188105	0.0710971	7	1.00108	0.269694	0.0747997	13	ClpXP protease specificity-enhancing factor
VC0578		1.02354	0.0779472	0.0216187	13	0.960971	0.105938	0.0243038	19	0.91186	0.256861	0.054763	22	0.967063	0.218964	0.0456572	23	1.07522	0.140414	0.0270227	27	0.923221	0.320854	0.0617483	27	hemolysin, putative
VC0579		0.98837	0.0866749	0.0240393	13	1.02143	0.140579	0.0375712	14	0.964315	0.0479347	0.0214371	5	1.03558	0.0749237	0.0305875	6	0.612605	0.494036	0.137021	13	0.740886	0.479725	0.181319	7	phosphoheptose isomerase, putative
VC0580		0.910908	0.112522	0.0503215	5	0.912798	0.0609152	0.0272421	5	1.07511	0.0853556	0.0381722	5	1.08697	0.0710958	0.0290247	6	1.19966	0.110442	0.0493914	5	0.944991	0.335587	0.111862	9	hypothetical protein
VC0581		0.521197	0.477498	0.0689209	48	0.621653	0.47126	0.0559282	71	0.149894	0.32582	0.0651641	25	0.132961	0.336852	0.0615005	30	0.139164	0.347648	0.0473089	54	ND			4	putative lipoprotein
VC0582		0.944751	0.220098	0.0317684	48	0.965166	0.176649	0.0231951	58	0.963067	0.153736	0.0219623	49	0.900663	0.257743	0.0338433	58	0.891261	0.337342	0.0386957	76	0.902349	0.318012	0.0407173	61	hypothetical protein
VC0583		0.935617	0.392725	0.0694246	32	1.04715	0.304583	0.0487723	39	1.03668	0.352264	0.0543556	43	1.15366	0.287237	0.0410339	49	0.687095	0.462636	0.0674825	47	0.74786	0.307863	0.0426929	52	HapR
VC0584		1.03107	0.0926708	0.0327641	8	0.887075	0.371182	0.117378	10	0.866878	0.327318	0.109106	9	0.902501	0.324767	0.108256	9	1.09245	0.0521926	0.0157366	11	0.852508	0.37998	0.105387	13	hypothetical protein
VC0585		0.919661	0.21935	0.0414533	28	0.917582	0.239772	0.0383943	39	0.845305	0.321036	0.0669407	23	0.997916	0.166571	0.0309314	29	0.986678	0.242438	0.0357455	46	1.00205	0.404333	0.0714767	32	hypoxanthine-guanine phosphoribosyltransferase
VC0586		0.806574	0.349946	0.0515968	46	0.907944	0.281873	0.0387183	53	0.915059	0.234223	0.0334604	49	0.898695	0.3042	0.0425965	51	0.965808	0.359619	0.0436102	68	0.776716	0.375308	0.0510729	54	carbonic anhydrase, putative
VC0587		0.965383	0.231907	0.0257674	81	0.937277	0.230305	0.0233839	97	0.997884	0.124393	0.0131122	90	0.995844	0.179192	0.0185814	93	1.00067	0.238821	0.0225665	113	0.934127	0.260999	0.0243383	117	sulfate permease family protein
VC0588		ND			4	1.14495	0.154806	0.0692314	5	ND				ND			1	1.00193	0.0391209	0.0174954	5	ND			2	hypothetical protein
VC0589		0.938759	0.293051	0.0574721	26	0.931726	0.268833	0.0475233	32	0.929503	0.285513	0.05828	24	0.917478	0.204247	0.0393073	27	1.01857	0.264203	0.0453104	34	0.887534	0.349932	0.058322	36	ABC transporter, ATP-binding protein
VC0590		1.00316	0.0713693	0.0168219	18	0.957181	0.0485182	0.00916907	28	0.861846	0.296168	0.0936564	10	0.942438	0.244251	0.0610628	16	1.01298	0.211842	0.0358078	35	0.945164	0.44313	0.107475	17	permease, putative
VC0591	panC	ND				ND				ND				ND				ND				ND				pantoate--beta-alanine ligase	Essential
VC0592	panB	ND				ND				ND				ND				ND				ND				3-methyl-2-oxobutanoate hydroxymethyltransferase	Essential
VC0593		ND			2	ND			4	0.851683	0.341004	0.120563	8	0.527308	0.435404	0.153938	8	0.571036	0.465084	0.164432	8	0.837996	0.37889	0.154681	6	2-amino-4-hydroxy-6- hydroxymethyldihydropteridine pyrophosphokinase
VC0594		ND			3	0.877383	0.225303	0.100759	5	0.168698	0.290172	0.129769	5	0.121632	0.289707	0.109499	7	0.320362	0.406774	0.135591	9	ND				polyA polymerase
VC0595		0.956189	0.161838	0.0228873	50	0.963015	0.196017	0.024313	65	0.962144	0.232768	0.0276245	71	1.00386	0.100632	0.011778	73	0.926107	0.307805	0.0333862	85	0.966633	0.281135	0.0308586	83	glutamyl-Q tRNA(Asp) synthetase
VC0596		0.77837	0.372565	0.0658608	32	0.91379	0.24765	0.0386764	41	0.14847	0.262414	0.0437357	37	0.12832	0.279048	0.0446834	39	0.025422	0.152147	0.0213048	51	ND				dnaK suppressor protein
VC0597		0.93412	0.214739	0.0274945	61	0.96472	0.160498	0.0174085	85	0.957579	0.219785	0.0288592	60	0.941867	0.258157	0.0310784	70	0.980765	0.277939	0.0271241	109	0.943812	0.3059	0.0344164	79	sugar fermentation stimulation protein A
VC0598		0.972984	0.0931274	0.0240454	15	1.02345	0.190913	0.0407027	22	0.969899	0.091902	0.0245618	14	0.925432	0.238213	0.0546499	19	0.962062	0.304935	0.0556732	30	0.781856	0.424787	0.103026	17	hypothetical protein
VC0599		ND				ND				ND				ND				ND				ND				hypothetical protein	Essential
VC0600		0.996765	0.158585	0.0160195	98	0.953866	0.20107	0.0177032	129	0.902049	0.266541	0.0301798	78	0.959579	0.208861	0.0217753	93	1.05956	0.122325	0.0103384	142	0.997218	0.268945	0.0277396	94	hypothetical protein
VC0601		0.976506	0.178726	0.0130697	189	0.963917	0.142658	0.00946856	228	0.946999	0.202415	0.0138046	220	0.953167	0.208743	0.0138547	233	0.98794	0.274442	0.0162851	297	0.983202	0.260614	0.0163847	261	ATP-dependent RNA helicase HrpB
VC0602		0.945653	0.193167	0.0139406	194	0.927689	0.167504	0.0108806	238	0.943329	0.176953	0.0126718	199	0.919952	0.225319	0.0155116	215	0.967071	0.256163	0.0153913	290	0.955936	0.299377	0.0193247	246	penicillin-binding protein 1B
VC0603		0.960021	0.133512	0.0119897	124	0.947765	0.201522	0.0163996	151	0.931133	0.172853	0.0142567	150	0.857475	0.290601	0.0234173	156	1.03075	0.195915	0.014139	195	1.02136	0.291958	0.0227981	166	hypothetical protein
VC0604		0.705614	0.361773	0.0426354	72	0.625727	0.401486	0.0405562	98	0.258759	0.357213	0.0426951	72	0.121927	0.299414	0.0343452	77	0.0473784	0.159727	0.0184437	75	0	X	X	8	bifunctional aconitate hydratase 2/2-methylisocitrate dehydratase
VC0605		0.940907	0.242711	0.0556817	19	0.979475	0.0513927	0.0107161	23	0.95145	0.11423	0.0277048	17	0.96323	0.150832	0.0346032	19	0.999516	0.228887	0.0440493	27	0.985005	0.244349	0.0509503	23	hypothetical protein
VC0606		0.935561	0.232648	0.0520216	20	0.948456	0.204557	0.0393671	27	0.780885	0.428143	0.107036	16	0.756044	0.420179	0.0916906	21	0.877271	0.370701	0.0645307	33	0.926278	0.310392	0.0694058	20	nitrogen regulatory protein P-II
VC0607		0.987291	0.115683	0.0135397	73	0.951801	0.104001	0.0109627	90	0.930222	0.254933	0.026019	98	0.978727	0.168426	0.0171899	96	0.951541	0.271291	0.0248692	122	0.943771	0.288418	0.0273755	113
VC0608		0.677485	0.35924	0.0704527	26	0.589674	0.394225	0.0648101	37	0.834006	0.291194	0.0635438	22	0.793919	0.35757	0.0715139	25	0.590716	0.454051	0.0790401	33	0.310631	0.534714	0.129687	17	iron(III) ABC transporter, periplasmic iron-compound-binding protein
VC0609		0.785397	0.331401	0.0331401	100	0.601191	0.405934	0.0344309	139	0.856192	0.303729	0.0373864	68	0.8515	0.294724	0.0315977	87	0.561315	0.474874	0.044091	122	0.634923	0.430906	0.0511391	71	iron(III) ABC transporter, permease protein
VC0610		0.835817	0.270843	0.0375592	52	0.590489	0.430764	0.0538455	64	0.787633	0.351615	0.0446552	63	0.767007	0.339808	0.042148	65	0.670968	0.477808	0.0632872	57	0.580904	0.454372	0.066277	47	iron(III) ABC transporter, ATP-binding protein
VC0611		0.982723	0.153791	0.0196909	61	0.966297	0.145344	0.0174973	69	0.952638	0.136181	0.0162767	70	0.985435	0.154498	0.0179601	75	0.971372	0.320108	0.0323358	98	0.990134	0.229285	0.0234013	97	phosphoglucomutase/phosphomannomutase, putative
VC0612		0.934683	0.21136	0.0170319	154	0.916386	0.197921	0.0143966	189	0.974359	0.183961	0.0134887	191	0.980856	0.167789	0.0119545	198	0.999466	0.223302	0.0142955	253	0.991195	0.261303	0.0159616	272	cellobiose/cellodextrin-phosphorylase, putative
VC0613		0.967538	0.205606	0.0174393	140	0.975829	0.115694	0.00935331	153	0.967118	0.128731	0.0111624	135	0.998047	0.149355	0.0127603	139	1.01282	0.210393	0.015859	180	0.973333	0.250326	0.019032	177	beta-N-acetylhexosaminidase
VC0614		0.982563	0.1887	0.0215044	77	0.957772	0.198837	0.0206185	93	0.986238	0.146146	0.0175939	69	0.978824	0.173733	0.0196714	78	1.03481	0.212862	0.0208729	106	0.964068	0.317047	0.0337973	88	hypothetical protein
VC0615		0.946913	0.210569	0.021163	99	0.973272	0.123957	0.011087	125	0.953597	0.179405	0.0168028	114	0.961563	0.184856	0.0171634	117	0.986505	0.241554	0.0201997	148	0.945962	0.324563	0.0285762	131	endoglucanase-related protein
VC0616		0.994868	0.139154	0.0202977	47	0.964318	0.170524	0.0216566	62	0.988633	0.130886	0.0195113	45	0.973024	0.138689	0.0190504	53	1.02635	0.188889	0.0206095	84	1.03044	0.241219	0.031404	59	peptide ABC transporter, ATP-binding protein
VC0617		0.938744	0.251696	0.0379446	44	0.893017	0.234583	0.0328482	51	0.931048	0.241051	0.0347928	48	1.01491	0.136565	0.0195093	49	0.970946	0.289704	0.0377163	59	0.955212	0.317982	0.0410512	60	peptide ABC transporter, ATP-binding protein
VC0618		0.971905	0.193441	0.0212329	83	0.979369	0.156315	0.0147704	112	0.93667	0.277553	0.0339085	69	0.970277	0.222664	0.0242947	84	1.00318	0.227707	0.0201267	131	0.976174	0.30349	0.031641	92	peptide ABC transporter, permease protein
VC0619		0.959573	0.183987	0.0177041	108	0.96475	0.203126	0.0183902	122	0.942682	0.245614	0.0216251	130	1.00576	0.13463	0.0120417	125	1.02634	0.212544	0.0174122	151	0.997042	0.193831	0.0154203	159	peptide ABC transporter, permease protein
VC0620		0.977509	0.151762	0.0146714	107	0.955767	0.208671	0.0183724	129	0.960073	0.171489	0.0159914	116	0.995492	0.152518	0.0139229	121	1.00601	0.221775	0.0177562	160	1.05716	0.212913	0.0170467	160	peptide ABC transporter, periplasmic peptide-binding protein
VC0621		0.939308	0.0879323	0.0332353	7	0.960594	0.0937632	0.0354391	7	1.01977	0.0661151	0.0209074	10	1.00981	0.117658	0.0354753	11	0.966654	0.365813	0.105601	12	0.902586	0.199345	0.046986	18	hypothetical protein
VC0622		0.987385	0.138745	0.0107364	168	0.967347	0.149343	0.0105866	200	0.990332	0.151889	0.0107671	201	0.971815	0.188048	0.0131338	207	0.989462	0.236913	0.0147782	267	0.993178	0.236471	0.0147506	262	sensory box sensor histidine kinase/response regulator
VC0623		0.990702	0.159554	0.0197902	65	0.967424	0.163417	0.0182705	80	0.941323	0.214764	0.0249659	75	0.922708	0.247141	0.0291258	72	0.917433	0.305423	0.0306962	100	0.937561	0.345498	0.0370413	87	hypothetical protein
VC0624		0.958187	0.190928	0.0231534	68	0.952066	0.162141	0.0170912	90	0.924709	0.212362	0.028128	58	0.918432	0.254986	0.0309216	68	0.997893	0.243755	0.0235647	108	0.987822	0.298336	0.0346808	74	hypothetical protein
VC0625		1.10047	0.162252	0.0662391	6	1.0233	0.118695	0.0419652	8	ND				ND			2	1.01742	0.201606	0.0823055	6	ND			1	hypothetical protein
VC0626		ND				ND				ND				ND				ND				ND				glutamate-1-semialdehyde aminotransferase	Essential
VC0627		ND				ND				ND				ND				ND				ND				iron-sulfur cluster insertion protein ErpA	Essential
VC0628		0.973768	0.18726	0.0252501	55	0.968691	0.0973118	0.011715	69	0.947867	0.218209	0.0314958	49	0.989906	0.180687	0.0241454	56	1.02612	0.211047	0.0223709	89	0.919386	0.420287	0.0538123	61	hypothetical protein
VC0629		0.994232	0.130604	0.00987275	177	0.966814	0.136135	0.00884291	238	0.978189	0.160827	0.0132199	152	0.983378	0.127019	0.00944123	183	0.994269	0.249659	0.0150825	285	0.982557	0.29124	0.0204916	206	multidrug resistance protein, putative
VC0630		0.956996	0.212026	0.0243211	76	0.944733	0.161579	0.0165777	95	0.932129	0.240376	0.0268749	81	0.967575	0.203504	0.0219444	86	1.01275	0.231062	0.0211814	121	0.974956	0.333592	0.0344074	95	hypothetical protein
VC0631		ND				ND				ND				ND				ND				ND				tyrosyl-tRNA synthetase	Essential
VC0632		0.995046	0.126172	0.017013	55	0.981335	0.101969	0.0116966	76	0.945772	0.198107	0.0238493	71	0.935853	0.256766	0.0296487	75	1.01125	0.231904	0.0228502	108	0.907654	0.36392	0.0390164	88	D-alanyl-D-alanine carboxypeptidase/endopeptidase
VC0633		0.403507	0.461049	0.12322	14	0.422661	0.365083	0.0975725	14	0	X	X	9	0.0934584	0.219115	0.077469	8	0.0455312	0.115058	0.0363847	10	ND				outer membrane protein OmpU
VC0634	greA	0.937381	0.0649672	0.0216557	9	0.884975	0.321835	0.097037	11	0.883302	0.125216	0.0442706	8	0.681647	0.375421	0.132731	8	0.813772	0.352126	0.0807833	19	0.737009	0.467985	0.14799	10	transcription elongation factor GreA
VC0635		0.946108	0.264803	0.0624147	18	0.988987	0.0907245	0.0177925	26	0.941412	0.129698	0.0324244	16	0.771656	0.399858	0.089411	20	0.987452	0.244846	0.0439757	31	0.975952	0.366337	0.0863464	18	hypothetical protein
VC0636	rrmJ	0.815842	0.321848	0.0758602	18	0.883351	0.248097	0.0506426	24	0.925913	0.225154	0.0450308	25	0.959008	0.243447	0.0507622	23	0.59316	0.475875	0.0883677	29	0.819095	0.368608	0.0824232	20	23S rRNA methyltransferase J
VC0637		ND				ND				ND				ND				ND				ND				cell division protein FtsH	Essential
VC0638		ND				ND				ND				ND				ND				ND				dihydropteroate synthase	Essential
VC0639		ND				ND				ND				ND				ND				ND				phosphoglucomutase/phosphomannomutase family protein MrsA	Essential
VC0640	secG	ND			4	ND			2	0.459538	0.512378	0.193661	7	0.57845	0.441208	0.197314	5	ND			4	ND				preprotein translocase subunit SecG
VC0641		0.678486	0.470081	0.210227	5	0.5729	0.455777	0.161142	8	ND				ND			1	0.273987	0.428839	0.191783	5	ND				hypothetical protein
VC0642	nusA	ND			2	ND			1	ND			1	ND				ND			2	ND			3	transcription elongation factor NusA
VC0643	infB	ND				ND				ND				ND				ND				ND				translation initiation factor IF-2	Essential
VC0644	rbfA	ND				ND				ND				ND				ND				ND				ribosome-binding factor A	Essential
VC0645	truB	0.954406	0.205026	0.0258308	63	0.914639	0.252745	0.029381	74	0.938588	0.209948	0.0280554	56	0.858385	0.261336	0.0337383	60	0.92556	0.332559	0.0374158	79	0.851304	0.413863	0.0548175	57	tRNA pseudouridine synthase B
VC0646	rpsO	ND				ND				ND				ND				ND				ND				30S ribosomal protein S15	Essential
VC0647		ND			3	ND			3	0	X	X	5	0	X	X	5	ND			1	ND				polynucleotide phosphorylase/polyadenylase	Essential
VC0648		0.90036	0.219378	0.0490545	20	0.97224	0.213654	0.0427308	25	0.843386	0.313801	0.0627602	25	0.925478	0.208238	0.0386689	29	0.938656	0.2894	0.0496318	34	0.959027	0.250319	0.0500638	25	lipoprotein NlpI
VC0649		1.04712	0.126046	0.0275055	21	0.979771	0.0907023	0.0162906	31	0.962097	0.225136	0.0491286	21	0.986564	0.0856489	0.0164831	27	0.91677	0.296614	0.0474963	39	0.95684	0.255438	0.0444661	33	MarR family transcriptional regulator
VC0650	vmrA	0.900757	0.261563	0.0304061	74	0.930619	0.163292	0.0160897	103	0.960733	0.224213	0.0249126	83	0.962044	0.162539	0.0166761	96	1.03871	0.236369	0.0212265	126	0.968132	0.267648	0.0261198	107	multidrug efflux pump VmrA
VC0651		0.960615	0.209574	0.0275184	58	0.963033	0.133644	0.0154318	75	0.91916	0.263048	0.0354694	55	0.954544	0.207752	0.0263846	62	0.983763	0.26885	0.0291609	85	0.978752	0.237596	0.0281974	71	hypothetical protein
VC0652		0.949848	0.194247	0.0250772	60	0.978455	0.180491	0.0207038	76	0.974937	0.121659	0.0123526	98	0.975987	0.14314	0.0143862	100	1.02313	0.129025	0.0124155	109	1.00583	0.250386	0.0225765	123	protease, putative
VC0653		0.954418	0.260919	0.0267698	95	0.939166	0.237896	0.0216269	121	0.937731	0.257097	0.0253326	105	0.989643	0.213635	0.0200088	116	1.00279	0.280483	0.0226757	157	0.973722	0.342314	0.0301391	130	c-di-GMP phosphodiesterase A-related protein
VC0654		0.951735	0.25481	0.0637024	16	0.947489	0.221004	0.0471182	22	0.950025	0.226164	0.049353	21	0.875905	0.346139	0.0678834	26	0.935049	0.298723	0.0554715	29	0.964273	0.380835	0.0794095	23	hypothetical protein
VC0655		0.997237	0.09035	0.0131789	47	0.965221	0.157226	0.0193531	66	0.943026	0.192626	0.0297229	42	0.918172	0.236093	0.0333885	50	1.03596	0.128709	0.014862	75	0.987726	0.30936	0.0396095	61	acetyltransferase, putative
VC0656		ND			1	ND			1	ND				ND				ND			1	ND				DNA polymerase III subunit psi	Essential
VC0657		0.932166	0.192515	0.0340321	32	0.951631	0.197765	0.0325123	37	0.93791	0.236845	0.036989	41	0.899788	0.269903	0.039795	46	0.88836	0.354532	0.0511722	48	0.957379	0.289166	0.0404914	51	ribosomal-protein-alanine acetyltransferase
VC0658		0.997127	0.122222	0.010598	133	0.972096	0.129899	0.0102694	160	0.979067	0.165411	0.0143972	132	1.0081	0.128799	0.0111683	135	1.0235	0.18587	0.0132764	204	0.987337	0.260752	0.0202382	169	c-di-GMP phosphodiesterase A-related protein
VC0659	prfC	0.69417	0.405771	0.044012	85	0.716479	0.433902	0.0429627	102	0.784526	0.316014	0.03448	85	0.632426	0.408932	0.0433468	90	0.471693	0.462825	0.0443306	110	0.75799	0.355234	0.0418648	72	peptide chain release factor 3
VC0660		0.476742	0.396816	0.0627422	40	0.386074	0.438607	0.0614173	51	0.373622	0.426657	0.075423	32	0.0843607	0.22341	0.0414861	29	0.294556	0.437934	0.072989	36	0.744373	0.516163	0.210723	6	ATP-dependent RNA helicase SrmB
VC0661		0.975862	0.14724	0.0186996	62	0.946189	0.162723	0.0197331	68	0.980464	0.104898	0.0110572	90	0.936931	0.196842	0.0211036	87	1.03548	0.201323	0.0200324	103	0.957968	0.358492	0.0344959	109	hypothetical protein
VC0662		0.920575	0.235238	0.0249352	89	0.92399	0.238087	0.0221059	116	0.946801	0.169298	0.0181506	88	0.927318	0.200132	0.0207527	94	0.968148	0.292464	0.024372	149	0.998287	0.273564	0.0268251	105	branched chain amino acid transport system II carrier protein
VC0663	prfB	ND				ND				ND				ND				ND				ND				peptide chain release factor 2	Essential
VC0664	lysS	ND				ND				ND				ND				ND				ND				lysyl-tRNA synthetase	Essential
VC0665		0.980243	0.106677	0.0136585	61	0.958683	0.137616	0.0159975	74	0.926786	0.277714	0.0320676	76	0.975067	0.179302	0.0198006	83	1.02074	0.214007	0.0214007	103	0.985789	0.328159	0.034591	91	sigma-54 dependent transcriptional regulator
VC0666		1.03168	0.0962904	0.0233538	17	0.983923	0.0650572	0.0135654	23	0.955911	0.23319	0.0486234	23	1.008	0.0901171	0.0180234	25	1.04192	0.148217	0.0270606	30	0.969125	0.298993	0.0520481	33	hypothetical protein
VC0667		0.954533	0.237716	0.0304364	61	0.944406	0.185545	0.0197791	88	0.885417	0.332794	0.0461502	53	0.91698	0.303828	0.039224	60	0.911167	0.346702	0.0341616	107	1.00834	0.314985	0.0410075	59	aldo/keto reductase family oxidoreductase TAS
VC0668		0.922687	0.255059	0.0368146	48	0.900588	0.223919	0.0313549	51	0.887253	0.281125	0.0340915	69	0.925092	0.190281	0.0237851	64	0.919408	0.317205	0.0399641	63	0.935993	0.27633	0.0327944	72	DNA mismatch repair protein
VC0669		ND			1	ND				ND			3	ND			3	ND			2	ND				hypothetical protein
VC0670		ND			2	ND			3	1.00055	0.0927849	0.0350694	7	1.03738	0.059154	0.0264545	5	ND			4	0.936234	0.346238	0.115413	9	hypothetical protein
VC0671		0.77907	0.40044	0.163479	6	0.669188	0.595218	0.210441	8	0.0346289	0.160654	0.0463767	12	0.0292289	0.123379	0.0390158	10	0.0937753	0.165547	0.0675842	6	ND				dinucleoside polyphosphate hydrolase
VC0672		0.985273	0.223561	0.0188944	140	1.03081	0.163747	0.0131525	155	0.964468	0.192439	0.014803	172	0.980689	0.167338	0.0127966	173	0.854778	0.280403	0.0196322	210	0.903805	0.295292	0.0200457	220	fused phosphoenolpyruvate-protein phosphotransferase PtsP/GAF domain-containing protein
VC0673		0.971494	0.216995	0.0452466	23	0.989564	0.175844	0.0321046	30	0.911391	0.242882	0.0436228	31	0.941938	0.10928	0.0193182	32	0.752159	0.395293	0.0632976	39	0.640146	0.427101	0.070215	37	hypothetical protein
VC0674		ND				ND				ND				ND				ND				ND				prolipoprotein diacylglyceryl transferase	Essential
VC0675	thyA	ND				ND				ND				ND				ND				ND				thymidylate synthase	Essential
VC0676		0.997693	0.101296	0.0147756	47	0.960673	0.098532	0.0126157	61	0.982354	0.183614	0.0229517	64	0.971586	0.170079	0.0207784	67	0.987106	0.271345	0.0290912	89	0.923925	0.346878	0.0397896	76	nptA protein
VC0677	nhaR	0.988942	0.0925167	0.0142756	42	0.974639	0.0909429	0.0126115	52	0.974817	0.133242	0.0192318	49	0.953246	0.209589	0.028261	55	1.01592	0.233777	0.0292222	64	0.982183	0.271137	0.0338922	64	transcriptional activator NhaR
VC0678		0.882419	0.336721	0.119049	8	0.96487	0.073017	0.02309	10	0.870706	0.362625	0.104681	12	0.680692	0.47848	0.138125	12	1.10773	0.300353	0.0867043	12	1.02323	0.259576	0.0749331	12	transcriptional activator HlyU
VC0679	rpsT	ND				ND				ND				ND				ND				ND				30S ribosomal protein S20	Essential
VC0680		ND				ND				ND				ND				ND				ND				MviN protein	Essential
VC0681		ND				ND				ND				ND				ND				ND				bifunctional riboflavin kinase/FMN adenylyltransferase	Essential
VC0682	ileS	ND				ND				ND				ND				ND				ND				isoleucyl-tRNA synthetase	Essential
VC0683	lspA	ND				ND				ND				ND				ND				ND				lipoprotein signal peptidase	Essential
VC0684		0.989505	0.0557912	0.0124753	20	0.998994	0.134337	0.0293146	21	0.981238	0.197813	0.0349687	32	1.00271	0.162392	0.0306892	28	0.988974	0.198373	0.0350677	32	1.01734	0.28406	0.0487158	34	peptidyl-prolyl cis-trans isomerase, FKBP-type
VC0685	ispH	ND				ND				ND				ND				ND				ND				4-hydroxy-3-methylbut-2-enyl diphosphate reductase	Essential
VC0686		ND				ND				ND				ND				ND				ND				hypothetical protein	Essential
VC0687		0.979071	0.18093	0.0190717	90	0.916771	0.243649	0.0219691	123	0.922659	0.252067	0.0238181	114	0.986867	0.159756	0.0147068	120	1.00394	0.215507	0.0173099	160	0.957896	0.310126	0.0252377	153	carbon starvation protein A, putative
VC0688		1.00432	0.11725	0.0169236	48	0.975863	0.177086	0.025298	49	0.99349	0.124574	0.0166469	56	0.967293	0.236357	0.0327768	52	1.0485	0.128183	0.0160229	64	0.995978	0.241809	0.0284975	72	hypothetical protein
VC0689		0.955559	0.188678	0.0158896	142	0.972034	0.176237	0.013438	173	0.952923	0.219811	0.0185115	143	0.985397	0.161348	0.0129598	157	1.00077	0.229247	0.0162509	204	0.849488	0.353987	0.0271495	172	hypothetical protein
VC0690		1.01759	0.103413	0.0185735	31	0.944915	0.257218	0.0422864	37	0.950367	0.231104	0.0306105	57	0.98012	0.199327	0.0266362	56	0.841814	0.321625	0.0450365	51	0.921305	0.290519	0.0357604	66	N-acetylmuramic acid-6-phosphate etherase
VC0691	anmK	0.982731	0.209431	0.0287676	53	0.950169	0.217031	0.0265146	67	0.960233	0.186937	0.028845	43	0.972114	0.198452	0.0277889	51	0.847003	0.336462	0.0385948	76	0.954944	0.293824	0.0379325	60	anhydro-N-acetylmuramic acid kinase
VC0692		0.954292	0.176031	0.0213469	68	0.977798	0.132724	0.0145684	83	0.942446	0.208951	0.0227984	84	0.986536	0.136977	0.0149454	84	0.676779	0.36009	0.0343333	114	0.893777	0.339604	0.0318068	115	beta-hexosaminidase
VC0693		1.02578	0.0920498	0.0123007	56	0.96	0.171545	0.0188296	83	1.00039	0.162922	0.0206911	62	0.990912	0.130294	0.0149458	76	1.01037	0.196881	0.0193992	104	0.983172	0.289594	0.0308709	88	putative two-component response-regulatory protein YehT
VC0694		0.966019	0.234768	0.022911	105	0.94505	0.190551	0.0167771	129	0.966388	0.1902	0.0195141	96	0.961838	0.201594	0.0193984	109	1.01925	0.204081	0.016948	150	0.990692	0.256212	0.0225582	131	hypothetical protein
VC0695		0.990232	0.149471	0.0189828	62	0.979341	0.142252	0.0165365	74	0.961324	0.131815	0.0158686	70	1.00807	0.0907091	0.0107652	71	0.955364	0.259814	0.0272359	91	0.971296	0.324054	0.0339701	91	phospho-2-dehydro-3-deoxyheptonate aldolase
VC0696	tyrA	0.979556	0.119839	0.0197013	37	0.993926	0.0841685	0.0125471	45	0.963448	0.214154	0.0291427	55	0.974679	0.203734	0.0274715	55	1.00561	0.2249	0.0283347	63	0.947445	0.305627	0.0394563	61	bifunctional chorismate mutase/prephenate dehydrogenase
VC0697		0.942735	0.224254	0.0439798	26	0.968463	0.15203	0.0273054	31	0.943667	0.221206	0.0403865	30	0.854519	0.324203	0.0612687	28	0.9964	0.238657	0.039235	37	0.996248	0.338111	0.0588576	33	hypothetical protein
VC0698		0.977068	0.195109	0.0236604	68	0.975784	0.169509	0.017968	89	0.957414	0.173776	0.0186307	89	0.956224	0.171192	0.0177518	94	1.00235	0.227199	0.0201606	127	0.96618	0.368797	0.0368797	101	putative ABC transporter ATP-binding protein
VC0699		ND				ND				ND				ND				ND				ND				hypothetical protein	Essential
VC0700		0.971547	0.219088	0.0209848	109	0.991483	0.148644	0.0123442	145	0.991534	0.177638	0.0181301	97	0.980354	0.168014	0.0153375	121	1.00857	0.205082	0.0148392	195	0.935212	0.35526	0.0310392	135	soluble lytic murein transglycosylase
VC0701		0.985798	0.272099	0.0906997	9	0.996839	0.061785	0.0171361	13	0.947058	0.0431821	0.014394	9	0.965849	0.07832	0.0236144	11	0.879479	0.374799	0.0859847	19	0.998322	0.177129	0.0491269	13	Trp operon repressor
VC0702		0.941126	0.267077	0.0433256	38	0.97798	0.0991499	0.0137496	52	0.916257	0.259732	0.0344024	58	0.984174	0.102032	0.0128548	63	1.00921	0.216955	0.0248865	76	0.953375	0.290096	0.0337229	74	NTPase
VC0703		0.962018	0.202927	0.0208199	95	0.966377	0.175189	0.0158609	122	0.981985	0.198231	0.0196278	104	0.969395	0.201787	0.0188167	116	1.01109	0.217936	0.017854	153	1.03685	0.225054	0.0198149	130	c-di-GMP phosphodiesterase A-related protein
VC0704		0.991845	0.10305	0.0127818	65	0.997983	0.126213	0.0136897	85	0.980865	0.189267	0.022952	69	0.997037	0.138678	0.0153145	82	1.0007	0.191569	0.0185197	108	0.971411	0.311408	0.0324665	92	spermidine/putrescine ABC transporter, periplasmic spermidine/putrescine-binding protein, putative
VC0705		0.97861	0.10524	0.0155169	46	0.945983	0.178623	0.0232548	59	0.895748	0.246523	0.0303449	66	0.818756	0.364906	0.0442514	69	0.989302	0.266792	0.0296436	81	0.903923	0.345262	0.0428244	66	chorismate mutase/prephenate dehydratase
VC0706		1.08307	0.102922	0.0297111	12	0.993037	0.0549621	0.0117179	22	0.710489	0.367295	0.129858	8	0.999785	0.0837893	0.023239	13	1.02108	0.357161	0.0674971	28	0.843084	0.30605	0.108205	8	sigma-54 modulation protein, putative
VC0707		ND				ND				ND				ND				ND				ND				hypothetical protein	Essential
VC0708		0.932605	0.113485	0.0428934	7	0.957992	0.105892	0.0305684	12	ND			4	0.699537	0.457809	0.173036	7	0.574959	0.491167	0.126819	15	0.891764	0.646436	0.289095	5	hypothetical protein
VC0709	rluD	0.626575	0.372163	0.0561057	44	0.707921	0.383695	0.0499528	59	0.678978	0.418224	0.0616638	46	0.345503	0.412998	0.0596111	48	0.365993	0.444834	0.0560438	63	0.666081	0.479263	0.0875011	30	23S rRNA pseudouridine synthase D
VC0710		0.984439	0.179272	0.0312072	33	0.990836	0.0927356	0.0132479	49	0.875686	0.302553	0.046685	43	0.966744	0.180967	0.0261203	48	0.923139	0.309297	0.0377866	68	0.999601	0.294283	0.0393253	56	hypothetical protein
VC0711		0.984032	0.161548	0.0134158	146	0.938493	0.239387	0.0185243	168	0.834364	0.284418	0.025338	128	0.733062	0.377455	0.0322482	138	0.785771	0.33949	0.0261147	177	0.841743	0.397513	0.0375615	113	clpB protein
VC0712		ND				ND				ND				ND				ND				ND				hypothetical protein	Essential
VC0713		ND				ND				ND				ND				ND				ND				hypothetical protein	Essential
VC0714		0.998055	0.160849	0.029869	29	0.996157	0.12794	0.0210332	37	0.941876	0.239791	0.0411239	34	0.946599	0.217099	0.0356909	37	1.02262	0.195544	0.0282244	48	1.01126	0.197226	0.0308015	41	hypothetical protein
VC0715		1.04151	0.0893877	0.0269514	11	0.941046	0.238697	0.0578926	17	0.892318	0.328345	0.103832	10	0.978817	0.119312	0.0344425	12	0.954388	0.264457	0.0606706	19	0.935262	0.370142	0.111602	11	nitroreductase A
VC0716		0.969974	0.0377595	0.0168866	5	0.996694	0.0611173	0.024951	6	1.0572	0.145964	0.0486548	9	1.09087	0.139852	0.0466172	9	1.00413	0.376418	0.113494	11	1.03847	0.114164	0.0380548	9	ferredoxin
VC0717		0.933149	0.270139	0.0343077	62	0.989453	0.104057	0.0120155	75	0.914558	0.158697	0.0196839	65	0.93089	0.180091	0.021224	72	1.02838	0.24265	0.025298	93	0.939237	0.332181	0.038357	75	protease, putative
VC0718	rdgC	0.97081	0.20471	0.0482507	18	1.00869	0.117431	0.0256256	21	0.983742	0.176809	0.0346751	26	0.956936	0.197237	0.0394475	25	0.983161	0.25689	0.0503803	26	0.918148	0.27914	0.0537206	27	recombination associated protein
VC0719		1.00422	0.109686	0.0145283	57	0.988632	0.110799	0.0134363	68	0.421769	0.392422	0.0494405	64	0.235093	0.341181	0.0426477	64	0.822057	0.3259	0.0355586	84	0.784915	0.455327	0.107322	18	DNA-binding response regulator PhoB
VC0720	phoR	0.970891	0.159912	0.0173448	85	0.961342	0.133709	0.0129262	107	0.517992	0.388574	0.0405116	95	0.293281	0.377249	0.0389103	95	0.729881	0.411946	0.0351949	140	0.838803	0.468591	0.0956508	24	phosphate regulon sensor protein
VC0721		0.840176	0.260263	0.0433772	36	0.927157	0.165157	0.0254842	42	0.897683	0.256647	0.0440146	34	0.858457	0.302709	0.0526949	33	0.29274	0.424541	0.0619257	47	0.487611	0.439303	0.0878606	25	phosphate ABC transporter, periplasmic phosphate-binding protein, putative
VC0722		0.981656	0.176958	0.0164302	116	0.967768	0.185866	0.0155975	142	0.883426	0.298774	0.0263056	132	0.953981	0.217311	0.0189145	134	1.0283	0.212941	0.0155303	195	0.900588	0.367118	0.0335132	121	exopolyphosphatase
VC0723		0.964575	0.195768	0.0185814	111	0.964211	0.224995	0.0188811	142	0.979586	0.176486	0.0163162	117	0.995298	0.155962	0.0136788	131	0.965656	0.248873	0.0189764	177	1.00459	0.215449	0.0171402	160	polyphosphate kinase
VC0724		0.394442	0.406826	0.0476153	73	0.454034	0.414488	0.0397008	109	0.0972785	0.216897	0.0309853	50	0.0352227	0.16172	0.0220073	54	0.248833	0.414002	0.0509601	66	ND				phosphate ABC transporter, permease protein
VC0725		0.354377	0.355847	0.0471331	57	0.465805	0.449948	0.0530269	72	0.0829911	0.203815	0.0265345	60	0.010695	0.0752609	0.00948198	63	0.119285	0.282616	0.0458465	38	ND				phosphate ABC transporter, permease protein
VC0726		0.358081	0.452157	0.0870176	27	0.596348	0.417937	0.0652708	41	0	X	X	6	0	X	X	11	0.0928848	0.293558	0.0527246	31	ND				phosphate ABC transporter, ATP-binding protein
VC0727		0.191735	0.339102	0.0799272	18	0.494898	0.430227	0.077271	31	0	X	X	7	0	X	X	11	0	X	X	15	ND				transcriptional regulator PhoU
VC0728		0.991235	0.0862085	0.0141726	37	0.998143	0.0721393	0.0106364	46	0.872745	0.329736	0.0573997	33	0.896702	0.320912	0.0520589	38	0.954354	0.271691	0.038813	49	0.939869	0.311845	0.0475559	43	hypothetical protein
VC0729		ND			2	ND			3	ND				ND			1	ND			3	ND			2	hypothetical protein
VC0730		0.942432	0.179914	0.0251931	51	0.962208	0.124524	0.0151007	68	0.987073	0.20841	0.0314189	45	0.986061	0.187947	0.0258165	53	0.979579	0.260442	0.0296801	77	0.998619	0.265559	0.0371857	51	copper homeostasis protein
VC0731		0.944448	0.20253	0.0298614	46	0.951888	0.146035	0.0200594	53	0.853884	0.304876	0.0449516	46	0.909635	0.284609	0.0415145	47	0.759709	0.383694	0.0472295	66	0.822118	0.382212	0.054053	50	anti-oxidant AhpCTSA family protein
VC0732		0.966962	0.182908	0.0223458	67	0.984819	0.190929	0.0207092	85	1.01023	0.140677	0.0200967	50	1.01404	0.173354	0.0221957	61	0.841771	0.357393	0.0362877	99	0.943828	0.310274	0.0363149	73	LysR family transcriptional regulator
VC0733		ND				ND				ND				ND				ND				ND				hypothetical protein	Essential
VC0734		0.962619	0.203978	0.0213827	91	0.942793	0.191212	0.0174552	120	0.955443	0.215365	0.0237831	84	0.978859	0.183075	0.0194059	90	0.915892	0.297876	0.0254493	141	0.894391	0.308081	0.0316084	95	malate synthase
VC0735		0.957393	0.0693091	0.030996	5	0.983613	0.0614463	0.0274796	5	0.864581	0.318336	0.100667	10	0.830596	0.366246	0.122082	9	1.00731	0.223939	0.0708156	10	1.00548	0.27881	0.0929366	9	hypothetical protein
VC0736		0.967057	0.226745	0.0281242	65	1.0031	0.130887	0.0141139	86	0.907035	0.257033	0.0349778	55	0.923974	0.259928	0.0327478	63	0.798274	0.40675	0.040675	105	0.808114	0.394264	0.0455257	75	isocitrate lyase
VC0737		1.01867	0.121914	0.0295686	17	0.973228	0.0970827	0.0202431	23	0.993178	0.130953	0.0300426	19	0.914439	0.285718	0.0595764	23	1.01305	0.235649	0.0430234	30	0.915856	0.422101	0.0827807	26	acetoin utilization protein AcuB, putative
VC0738		1.01761	0.159282	0.0386315	17	0.972253	0.259486	0.0508895	26	0.829549	0.345038	0.0890883	15	0.977501	0.076676	0.0171453	20	0.92213	0.332342	0.0606771	30	0.98838	0.266994	0.0597018	20	hypothetical protein
VC0739	queA	0.874144	0.253174	0.0410702	38	0.926867	0.259022	0.0359199	52	0.677772	0.403024	0.0723852	31	0.598201	0.430772	0.0708184	37	0.734668	0.385675	0.0485905	63	0.758589	0.400711	0.078586	26	S-adenosylmethionine:tRNA ribosyltransferase-isomerase
VC0740		0.889688	0.156684	0.0639662	6	0.806742	0.437293	0.145764	9	0.704536	0.441803	0.156201	8	0.553279	0.443285	0.140179	10	0.929213	0.272937	0.0682343	16	0.907225	0.343171	0.140099	6	hypothetical protein
VC0741	tgt	0.891589	0.275481	0.0371458	55	0.877508	0.235195	0.0283141	69	0.627266	0.40986	0.0625031	43	0.435357	0.417468	0.0584572	51	0.710412	0.425079	0.0490839	76	0.591493	0.389458	0.0812076	23	queuine tRNA-ribosyltransferase
VC0742	yajC	0.87243	0.303476	0.0959677	10	0.823149	0.420796	0.126875	11	0.802302	0.353209	0.0943991	14	0.849086	0.339312	0.0979508	12	0.839836	0.303954	0.0812352	14	1.0066	0.206824	0.0517059	16	preprotein translocase subunit YajC
VC0743	secD	0.95165	0.228175	0.0234102	95	0.971699	0.164418	0.0149471	121	0.90199	0.263831	0.027657	93	0.957838	0.160472	0.0161281	100	0.884493	0.315903	0.0257078	154	0.784997	0.381434	0.0363683	110	preprotein translocase subunit SecD
VC0744	secF	0.954472	0.15299	0.0342096	20	0.995455	0.140494	0.0286783	24	0.951991	0.171594	0.0330233	27	0.935856	0.187906	0.0368515	26	0.898043	0.332585	0.064006	27	0.780799	0.3483	0.0557727	39	preprotein translocase subunit SecF
VC0745		0.543848	0.409016	0.102254	16	0.5169	0.420122	0.0916781	21	0	X	X	16	0.100744	0.249754	0.0605743	17	0.258109	0.401883	0.116014	12	ND			1	inositol monophosphate family protein
VC0746		0.997945	0.152304	0.0217577	49	0.943936	0.28632	0.0352436	66	0.908139	0.229243	0.0382071	37	0.92928	0.251556	0.0388159	42	0.88449	0.280654	0.0321932	76	1.01826	0.242085	0.0317873	58	RNA methyltransferase
VC0747		0.952886	0.0694183	0.0245431	8	0.821421	0.3242	0.114622	8	0.869417	0.289889	0.0804006	13	0.596484	0.465144	0.134275	12	0.924696	0.214584	0.0619452	12	0.858762	0.379384	0.114388	11	hypothetical protein
VC0748		ND				ND				ND				ND				ND				ND				cysteine desulfurase	Essential
VC0749		ND				ND				ND				ND				ND				ND				scaffold protein	Essential
VC0750		ND				ND				ND				ND				ND				ND				hesB family protein	Essential
VC0751	hscB	ND				ND				ND				ND				ND				ND				co-chaperone HscB	Essential
VC0752	hscA	ND				ND				ND				ND				ND				ND				chaperone protein HscA	Essential
VC0753		ND				ND				ND				ND				ND				ND				ferredoxin	Essential
VC0754		0.984063	0.121385	0.0365988	11	0.961609	0.0850507	0.0206278	17	1.02206	0.13717	0.0380442	13	0.9585	0.272054	0.0702441	15	0.896554	0.30729	0.0640743	23	0.671375	0.457668	0.111001	17	hypothetical protein
VC0755		0.9778	0.201386	0.0249789	65	0.921794	0.185538	0.0212826	76	0.942857	0.223141	0.0266705	71	0.932584	0.271465	0.0324462	70	0.901649	0.329616	0.0364	82	0.969867	0.355373	0.0387743	84	aminopeptidase B
VC0756	ndk	0.833707	0.334695	0.0788883	18	0.906503	0.225634	0.0426407	28	0.150935	0.28008	0.0660154	18	0.194799	0.323438	0.0742017	19	0.18379	0.265852	0.0542669	24	ND			2	nucleoside diphosphate kinase
VC0757		0.934523	0.218725	0.0341592	41	0.950959	0.191504	0.0255909	56	0.832681	0.357397	0.0652514	31	0.868651	0.343274	0.0536103	41	0.718206	0.40895	0.0523607	61	0.945558	0.309567	0.0547242	32	hypothetical protein
VC0758		0.814811	0.389945	0.0813092	23	0.767743	0.403853	0.0725341	31	0.598203	0.501276	0.144706	12	0.54466	0.481015	0.120254	16	0.677285	0.470079	0.0844287	31	0.772376	0.511107	0.228574	5	hypothetical protein
VC0759	ispG	ND				ND				ND				ND				ND				ND				4-hydroxy-3-methylbut-2-en-1-yl diphosphate synthase	Essential
VC0760	hisS	ND				ND				ND				ND				ND				ND				histidyl-tRNA synthetase	Essential
VC0761		0.247918	0.332555	0.135765	6	0.840849	0.174623	0.0582076	9	0.320745	0.395542	0.149501	7	0.0525436	0.152197	0.0481289	10	0.0446573	0.147406	0.0380602	15	ND			1	hypothetical protein
VC0762		ND				ND				ND				ND				ND				ND				outer membrane protein assembly complex subunit YfgL	Essential
VC0763	engA	ND				ND				ND				ND				ND				ND				GTP-binding protein EngA	Essential
VC0764		0.997871	0.120775	0.0169119	51	0.982485	0.184389	0.0236086	61	0.896958	0.345659	0.0484019	51	0.945294	0.23301	0.0303353	59	1.00736	0.266943	0.0316803	71	0.930515	0.283286	0.0354107	65	hypothetical protein
VC0765		1.01451	0.0873923	0.017139	26	1.00479	0.0539997	0.00912762	35	0.994058	0.211237	0.0414271	26	1.02965	0.0832763	0.0152041	30	0.980507	0.250251	0.0377268	44	1.04119	0.112642	0.0171777	43	hypothetical protein
VC0766	xseA	0.949881	0.213664	0.0238883	80	0.938773	0.204726	0.0206804	98	0.917018	0.266234	0.0271724	97	0.917783	0.267977	0.0260282	107	0.821729	0.418154	0.0388246	118	0.895617	0.355588	0.0374822	91	exodeoxyribonuclease VII large subunit
VC0767		0.832372	0.30145	0.043971	47	0.912895	0.29654	0.0437224	46	0.0702344	0.173217	0.0247453	49	0.0499558	0.129638	0.0191141	46	0.80545	0.478114	0.0612162	61	ND				inositol-5-monophosphate dehydrogenase
VC0768	guaA	0.62822	0.395908	0.0596854	44	0.699821	0.40022	0.050828	62	0.0198955	0.0841262	0.0161901	28	0.0180814	0.0920248	0.0160195	33	0.621094	0.522681	0.0629234	70	ND				bifunctional GMP synthase/glutamine amidotransferase protein
VC0769		0.946717	0.21378	0.0280707	58	0.987183	0.0979116	0.0111581	77	1.01942	0.0835433	0.0103623	65	0.995587	0.152892	0.018406	69	1.00981	0.22243	0.0228208	96	0.975131	0.28874	0.0304358	90	chitinase, putative
VC0770		1.00314	0.0888355	0.0146045	37	0.992518	0.140283	0.0200404	49	0.832703	0.405539	0.0753067	30	1.0034	0.0894996	0.0145188	38	0.972353	0.261345	0.0326681	64	0.966309	0.379102	0.0623239	37	hypothetical protein
VC0771		0.96851	0.243853	0.0376273	42	0.961206	0.204177	0.0275313	55	1.0197	0.0874862	0.0107688	66	0.990755	0.100135	0.0121432	68	1.01789	0.180709	0.021007	74	0.921882	0.266865	0.02813	90	vibriobactin-specific isochorismatase
VC0772		1.00719	0.126427	0.0121095	109	0.99019	0.0952462	0.00799289	142	0.980427	0.17821	0.0177326	103	0.993173	0.15175	0.0141508	116	1.02289	0.128726	0.00978684	175	0.961562	0.304904	0.0256776	142	vibriobactin-specific 2,3-dihydroxybenzoate-AMP ligase
VC0773		0.945935	0.219536	0.0195579	126	0.965756	0.219287	0.0173362	160	0.972559	0.176955	0.0150634	142	0.953808	0.19706	0.0161438	151	0.995847	0.207595	0.0144991	210	0.99062	0.245821	0.0193734	162	vibriobactin-specific isochorismate synthase
VC0774		0.996935	0.13879	0.0192467	52	0.982437	0.096165	0.0114939	70	0.994907	0.199922	0.034802	34	0.995713	0.115484	0.0170273	46	0.980613	0.23938	0.0271045	78	0.963561	0.316866	0.0412524	59	2,3-dihydroxybenzoate-2,3-dehydrogenase
VC0775		0.987398	0.121458	0.0130971	86	0.978526	0.142975	0.0135706	111	0.988748	0.145048	0.0142231	106	0.944663	0.215267	0.0205249	111	1.01479	0.184117	0.014885	156	0.964001	0.337712	0.0295061	132	vibriobactin synthesis protein, putative
VC0776		0.994232	0.161464	0.020183	64	0.965327	0.127326	0.0148013	74	0.980426	0.182908	0.0230442	63	1.00381	0.142164	0.0173681	67	0.984024	0.253728	0.0270475	89	0.943179	0.310895	0.0337213	86	iron-enterobactin transporter periplasmic binding protein
VC0777		0.969919	0.213846	0.0220565	94	0.970869	0.222449	0.0214051	108	0.988355	0.151735	0.0166551	83	1.01298	0.116777	0.0125923	87	0.999728	0.277694	0.0262397	115	0.924706	0.262271	0.0269084	95	ferric vibriobactin ABC transporter, permease protein
VC0778		1.02189	0.129936	0.0185623	49	0.984698	0.12544	0.0163309	59	0.934324	0.266298	0.0450125	35	0.985218	0.185732	0.0290065	41	1.06822	0.163438	0.0209261	61	0.962176	0.258458	0.0365514	50	ferric vibriobactin ABC transporter, permease protein
VC0779		0.997907	0.123654	0.0153374	65	1.01112	0.152618	0.0168538	82	0.971535	0.195638	0.0198641	98	0.983099	0.169861	0.0169861	100	1.00358	0.21289	0.0201162	114	0.961224	0.245025	0.0217425	128	ferric vibriobactin ABC transporter, ATP-binding protein
VC0780		1.0018	0.144318	0.0167766	74	0.99416	0.0804808	0.00821404	96	0.939725	0.246816	0.0292917	72	0.965367	0.233417	0.0259352	81	1.01143	0.15969	0.0150224	115	0.982032	0.307087	0.0313419	96	vibriobactin synthase component D
VC0781		1.02328	0.199309	0.0290723	47	1.02789	0.128152	0.0166839	59	0.973109	0.18357	0.0270659	46	0.981456	0.139012	0.0200646	48	0.969618	0.269215	0.0324097	69	0.981898	0.286568	0.0361041	63	LysR family transcriptional regulator
VC0782		0.999363	0.0740064	0.030213	6	0.774042	0.56369	0.230125	6	0.832905	0.411506	0.145489	8	0.971371	0.0636935	0.0240739	7	0.887264	0.46342	0.146546	10	1.10427	0.334657	0.126488	7	hypothetical protein
VC0783		1.00097	0.195538	0.0201682	94	0.966487	0.203255	0.0201252	102	0.977199	0.128965	0.012132	113	0.929454	0.255346	0.0249192	106	0.974666	0.257146	0.022467	132	0.954643	0.272164	0.0234241	138	hypothetical protein
VC0784		0.984379	0.192812	0.0189068	104	0.983654	0.179001	0.0158216	128	0.937854	0.201425	0.0183875	122	0.903553	0.27048	0.0244881	125	0.863779	0.320976	0.0253754	164	0.992444	0.270035	0.0221967	151	sodium/alanine symporter
VC0785		ND			2	ND			1	ND			3	ND			2	ND				ND			2	hypothetical protein
VC0786		0.997369	0.145985	0.0193361	57	1.01303	0.166498	0.0199004	70	0.975273	0.180194	0.0247516	54	0.981383	0.190085	0.0245398	60	0.967319	0.260517	0.0279303	87	0.975299	0.361368	0.0428865	72	D-amino acid dehydrogenase small subunit
VC0787		0.989907	0.191808	0.0303275	40	0.977561	0.118451	0.0158287	56	0.932878	0.257899	0.0423983	37	0.961906	0.232939	0.034345	46	0.93142	0.321507	0.0387049	69	0.923084	0.371085	0.0495883	56	LysR family transcriptional regulator
VC0788		0.989128	0.0686369	0.0146334	22	0.98469	0.133558	0.0284747	22	0.960929	0.22515	0.0398013	32	0.991755	0.243921	0.0460968	28	1.04045	0.218568	0.0369448	35	0.975899	0.255863	0.0381418	45	DOPA-dioxygenase-related protein
VC0789		1.04317	0.12051	0.0262973	21	0.999652	0.139209	0.0267908	27	0.95845	0.154368	0.0398577	15	0.985373	0.259102	0.061071	18	0.974657	0.348532	0.063633	30	1.02194	0.382347	0.0877163	19	hypothetical protein
VC0790		0.959157	0.23666	0.0378959	39	0.994871	0.118775	0.0190192	39	1.01752	0.140973	0.0167304	71	1.01632	0.146067	0.0181174	65	0.948488	0.353344	0.0499703	50	0.991623	0.248221	0.0269233	86	transcriptional regulator CitB
VC0791		0.937645	0.221144	0.0234412	89	0.968058	0.182799	0.0176718	107	0.982939	0.181996	0.0179326	105	0.986709	0.194269	0.0186076	110	0.962688	0.253065	0.022368	130	0.960462	0.264486	0.0229338	135	sensor kinase citA
VC0792		0.999375	0.147706	0.0168326	77	0.982488	0.22637	0.0236007	92	0.987429	0.163465	0.0161067	103	0.993814	0.155376	0.0154605	101	1.00447	0.242075	0.0232936	109	0.957163	0.277969	0.0237485	137	oxaloacetate decarboxylase, beta subunit
VC0793		0.996645	0.121153	0.00943173	165	0.989573	0.0847687	0.00570216	221	1.00079	0.179878	0.0148868	151	1.01487	0.148679	0.0113039	177	0.997065	0.232425	0.0142509	276	1.02102	0.278901	0.0194319	209
VC0793m	oadA-2	ND				ND				ND				ND				ND				ND				pyruvate carboxylase subunit B	Essential
VC0794		1.01277	0.140797	0.0257059	30	0.985112	0.154538	0.0257563	36	0.978999	0.215454	0.0310981	49	0.933638	0.267849	0.0382641	49	0.981791	0.236273	0.031859	55	0.993986	0.212739	0.0276962	59	hypothetical protein
VC0795		0.979424	0.170081	0.0146382	135	0.982204	0.116145	0.00873	177	0.994402	0.18682	0.0165776	131	0.973255	0.210975	0.0171124	153	0.996268	0.238404	0.0161468	227	0.979391	0.273176	0.0212667	168	citrate/sodium symporter
VC0796		0.970635	0.171609	0.0125493	188	0.974725	0.193932	0.0130749	221	0.985155	0.151314	0.0104917	213	0.986725	0.169272	0.0116257	216	0.997855	0.216466	0.0129363	290	0.9766	0.272135	0.0169424	264	citrate (pro-3S)-lyase ligase
VC0797		0.967817	0.198852	0.0314412	40	0.956266	0.200247	0.0324843	38	0.959488	0.217031	0.0292644	55	0.966896	0.196632	0.027808	50	1.00011	0.238733	0.031902	56	0.997563	0.206602	0.0256258	66	citrate lyase subunit gamma
VC0798		0.963794	0.208933	0.0255253	67	0.990766	0.178045	0.0188727	89	0.914528	0.272056	0.0351222	61	0.927065	0.253509	0.0294698	74	0.995391	0.183714	0.0174374	112	0.961023	0.359172	0.0420379	73	citrate lyase, beta subunit
VC0799		0.978182	0.176104	0.0233255	57	0.99237	0.0999536	0.0118623	71	0.958004	0.270937	0.0302917	81	0.978046	0.175008	0.0190949	84	0.998806	0.241765	0.0242983	101	0.956082	0.244977	0.0252675	94	citrate lyase, alpha subunit
VC0800		1.01136	0.0616169	0.0118582	27	0.941686	0.179353	0.0312214	33	0.902519	0.283503	0.0479208	35	0.890895	0.317145	0.0514477	38	0.953336	0.279422	0.0411985	46	0.922827	0.338363	0.0556266	37	citX protein
VC0801		1.02819	0.128118	0.0148935	74	0.988895	0.169473	0.0167803	102	1.00106	0.199399	0.0218868	84	1.00724	0.148775	0.0154272	93	1.02242	0.239386	0.0223229	118	0.935479	0.299168	0.0282687	113	citG protein
VC0802		1.01165	0.0585427	0.01195	24	0.886983	0.253919	0.0554096	21	0.988159	0.215553	0.0400273	29	0.987995	0.210268	0.039737	28	1.03882	0.203209	0.037735	29	1.00796	0.143531	0.0229833	39	hypothetical protein
VC0803		0.982105	0.126447	0.0188497	45	0.925398	0.22112	0.0285465	60	0.918975	0.209752	0.0302751	48	0.925506	0.24413	0.0326233	56	0.94969	0.260011	0.0294405	79	0.944765	0.368261	0.0475423	60	RNA methyltransferase
VC0804		0.826808	0.288475	0.0645051	20	0.922558	0.217662	0.0453856	23	0.895501	0.277483	0.0672995	17	0.878373	0.396092	0.0933599	18	0.982666	0.180748	0.0361497	25	0.933389	0.399616	0.0916782	19	ferredoxin
VC0805		1.00357	0.0651867	0.0196545	11	0.994353	0.157795	0.0475769	11	0.992912	0.149294	0.0373236	16	0.999754	0.0868126	0.0232016	14	0.995244	0.234312	0.0568291	17	1.01229	0.120702	0.0276909	19	hypothetical protein
VC0806		0.940618	0.263248	0.024442	116	0.973379	0.176387	0.0146989	144	0.984014	0.174883	0.0159645	122	0.971283	0.212333	0.0184812	134	0.97197	0.272924	0.0209942	177	0.967966	0.255867	0.0202916	160	hypothetical protein
VC0807		0.99446	0.101132	0.0178777	32	0.954776	0.184991	0.0296223	39	0.929311	0.25018	0.0411293	37	0.826094	0.364706	0.0591631	38	1.00813	0.114206	0.0170248	45	0.882557	0.361372	0.0551087	43	hypothetical protein
VC0808		0.961245	0.0805162	0.0254615	10	0.944744	0.141752	0.0378847	14	0.962136	0.344865	0.109056	10	0.940506	0.256942	0.0774709	11	0.981299	0.205284	0.0497888	17	0.875327	0.406913	0.108752	14	hypothetical protein
VC0809		1.00935	0.146047	0.0139888	109	0.989154	0.147753	0.0126697	136	0.985103	0.207013	0.0175586	141	0.987495	0.19213	0.0160667	144	1.01042	0.204455	0.0160635	165	0.981041	0.263198	0.0204899	169	hypothetical protein
VC0810		0.961905	0.224286	0.0243273	85	0.969391	0.166565	0.0159541	109	0.983379	0.215963	0.0246113	79	0.99917	0.179605	0.0193673	86	1.01788	0.199812	0.0173259	137	0.964217	0.317322	0.0320544	98	hypothetical protein
VC0811		0.974166	0.155275	0.0170437	83	1.00883	0.157945	0.0158741	99	0.988917	0.174011	0.0152034	132	1.00576	0.145222	0.013202	122	0.965765	0.240392	0.0205381	141	0.98062	0.252509	0.019839	165	hypothetical protein
VC0812		0.93839	0.233463	0.0146777	255	0.982465	0.148022	0.00842066	310	0.981884	0.161148	0.0104457	241	0.996434	0.132253	0.00834775	256	1.02389	0.172789	0.00884065	393	1.00976	0.234534	0.0131314	325	helicase-related protein
VC0813		1.0151	0.141399	0.0226419	39	0.986766	0.186942	0.0264376	50	0.919335	0.273296	0.0416772	44	0.91961	0.293487	0.0410964	51	0.90524	0.344188	0.0411383	70	0.949696	0.307269	0.0434544	50	tellurite resistance protein-related protein
VC0814		ND				ND				ND				ND				ND				ND				transcriptional regulator, putative	Essential
VC0815		0.952215	0.294714	0.032746	81	0.977239	0.145994	0.0150581	94	0.932704	0.245434	0.0272704	83	0.940309	0.233897	0.0259885	82	0.948148	0.290709	0.0269917	117	0.964908	0.2693	0.02693	102	hypothetical protein
VC0816		1.00087	0.107946	0.0269864	16	1.01137	0.100267	0.02188	21	0.925089	0.265256	0.0484289	30	1.02698	0.168523	0.0307679	30	0.947367	0.26411	0.0474356	31	0.977432	0.281497	0.0497621	32	hypothetical protein
VC0817		0.994309	0.153765	0.0190722	65	1.00226	0.232633	0.0288546	65	0.978876	0.164321	0.0187261	78	0.970609	0.16122	0.0188693	74	0.947987	0.317837	0.0331368	92	0.990858	0.242951	0.026198	88	transposase, putative
VC0818		0.974121	0.185032	0.0204334	82	0.9999	0.123648	0.0120668	105	0.97722	0.223498	0.0241004	87	1.0049	0.18685	0.0190703	97	0.955619	0.25733	0.0225693	134	0.967563	0.30616	0.0284262	118
VC0819		0.989763	0.180389	0.00999084	329	0.97643	0.168533	0.00832327	413	0.968099	0.198592	0.0102965	383	1.00935	0.119495	0.00598224	405	1.00295	0.19106	0.00836248	545	1.00015	0.230169	0.0107084	477	aldehyde dehydrogenase
VC0820		0.976139	0.188822	0.00768944	610	0.985556	0.176133	0.00646603	746	1.00007	0.139632	0.00540252	691	1.00827	0.162042	0.00603894	739	0.993693	0.206925	0.00675635	981	1.01542	0.241258	0.00810981	912	ToxR-activated gene A protein
VC0821		0.956546	0.218728	0.0178591	150	0.983879	0.144533	0.0108637	178	0.950576	0.246081	0.0217507	131	0.992614	0.184107	0.0156158	140	1.00216	0.195844	0.0134506	216	0.982779	0.278844	0.0214496	172	hypothetical protein
VC0822		0.966267	0.187524	0.00723929	676	0.992277	0.148857	0.00526619	805	0.993305	0.131007	0.00478052	775	1.01319	0.119071	0.00433343	774	0.999922	0.184659	0.00585408	1043	1.0134	0.225987	0.00725228	1002	inner membrane protein, putative
VC0823		0.98327	0.14821	0.0118663	156	0.999389	0.130659	0.00942947	192	0.996998	0.172139	0.0127598	186	0.993248	0.174523	0.0125624	196	0.989535	0.216753	0.0137638	259	0.993435	0.272558	0.017557	245	hypothetical protein
VC0824		0.992038	0.16772	0.0176792	90	0.987645	0.102891	0.00963663	114	0.943645	0.277554	0.0286275	96	1.02297	0.12333	0.0120357	105	0.98527	0.219946	0.0185888	144	0.989807	0.213845	0.0199412	116	tagD protein
VC0825		0.97772	0.161329	0.010661	230	0.986599	0.16203	0.00938617	299	0.982864	0.185555	0.0133913	193	1.04857	0.0922636	0.00615091	225	0.981928	0.200956	0.0108506	349	0.981938	0.296475	0.0179764	279	toxin co-regulated pilus biosynthesis protein I
VC0826		0.935327	0.249959	0.0232081	116	0.970413	0.223473	0.0191626	136	0.891312	0.264667	0.0221326	146	0.884232	0.253294	0.0219634	135	0.976161	0.250172	0.0195949	167	0.9914	0.29626	0.0245187	148	toxin co-regulated pilus biosynthesis protein P
VC0827		0.981071	0.197873	0.0305325	42	0.98637	0.0820005	0.0112636	53	0.973524	0.115712	0.0168783	47	0.928125	0.197187	0.0284614	48	1.04657	0.143216	0.0172412	69	0.909388	0.370754	0.0499925	55	toxin co-regulated pilus biosynthesis protein H
VC0828		0.962403	0.23363	0.0196058	143	0.976225	0.16721	0.0126761	175	0.218542	0.278401	0.024802	128	0.0950885	0.212209	0.0178082	145	1.0008	0.20973	0.0145421	214	0.385174	0.432826	0.0944503	21	toxin co-regulated pilin
VC0829		0.956156	0.219688	0.0149134	218	0.997764	0.103815	0.00628315	273	0.23207	0.310397	0.0207857	230	0.0910366	0.213156	0.0137591	248	0.974578	0.212057	0.0115344	354	0.506965	0.468167	0.0780279	37	toxin co-regulated pilus biosynthesis protein B
VC0830		0.979539	0.209502	0.0196217	114	1.01315	0.214763	0.0187639	131	0.282576	0.320957	0.0285931	128	0.117873	0.24773	0.0212427	137	0.998063	0.190464	0.0148276	168	0.711825	0.523095	0.0955036	30	toxin co-regulated pilus biosynthesis protein Q
VC0831		0.986187	0.166774	0.00944171	316	0.990719	0.14277	0.00724805	388	0.230726	0.316337	0.0182334	312	0.12606	0.264227	0.014702	335	0.999417	0.188022	0.0088243	467	0.594444	0.477055	0.0655285	55	toxin co-regulated pilus biosynthesis outer membrane protein C
VC0832		0.964944	0.185323	0.0245466	57	0.985295	0.0699845	0.0086145	66	0.227619	0.33987	0.0458281	55	0.133298	0.269143	0.0362913	55	0.951728	0.276003	0.030667	81	0.598914	0.377825	0.100978	14	toxin co-regulated pilus biosynthesis protein R
VC0833		0.968099	0.195861	0.0193932	102	0.986439	0.162065	0.0150473	116	0.244873	0.306973	0.0288776	115	0.127925	0.245213	0.0230677	114	1.02243	0.178206	0.0146484	152	0.390517	0.429783	0.0961025	20	toxin co-regulated pilus biosynthesis protein D
VC0834		1.00542	0.2163	0.0312202	48	0.98155	0.166514	0.0206535	65	0.0920989	0.225494	0.0480755	22	0.0883036	0.245039	0.0402842	37	0.959417	0.293707	0.0348567	72	0.432538	0.519282	0.173094	9	toxin co-regulated pilus biosynthesis protein S
VC0835		0.963098	0.197409	0.0118185	282	0.99439	0.143241	0.00773429	346	0.226265	0.318709	0.0189453	292	0.121425	0.26322	0.0151466	314	0.986404	0.216407	0.0105722	438	0.535446	0.455585	0.0588158	62	toxin co-regulated pilus biosynthesis protein T
VC0836		0.985399	0.172035	0.0107312	259	0.984003	0.149304	0.0082819	327	0.240673	0.305798	0.0185417	280	0.134054	0.276816	0.0162833	299	1.00919	0.194085	0.00979032	409	0.511885	0.467602	0.0748762	39	toxin co-regulated pilus biosynthesis protein E
VC0837		0.997918	0.17733	0.0105041	288	0.998588	0.154309	0.00821302	355	0.21908	0.301639	0.0173287	311	0.111444	0.234852	0.0131906	328	0.995258	0.222471	0.0109207	434	0.483595	0.46916	0.0691739	48	toxin co-regulated pilus biosynthesis protein F
VC0838		0.915063	0.2951	0.0444879	44	0.926503	0.224853	0.0346956	42	0.22222	0.273836	0.0345001	63	0.11236	0.229597	0.0327995	49	0.981592	0.198652	0.0244524	66	0.565181	0.394576	0.118969	11	TCP pilus virulence regulatory protein
VC0839		1.00814	0.11128	0.0109119	104	1.01327	0.0938921	0.00899323	109	0.151252	0.263518	0.021661	151	0.0973663	0.211778	0.0182948	136	1.00695	0.199921	0.0154243	171	0.31005	0.397961	0.1407	8	leader peptidase TcpJ
VC0840		1.00468	0.129361	0.00684651	359	1.00854	0.130837	0.0064695	411	0.970227	0.164871	0.00797868	439	0.965014	0.175794	0.00862937	427	0.998969	0.17896	0.00766579	558	1.01487	0.227073	0.0102686	500	accessory colonization factor AcfB
VC0841		1.00218	0.159423	0.0128466	155	0.994649	0.187705	0.0137632	187	0.972199	0.22567	0.0183042	154	0.967357	0.20687	0.0161048	167	1.01171	0.190582	0.012849	226	0.986128	0.263882	0.0192455	189	accessory colonization factor AcfC
VC0842		1.02613	0.105133	0.016623	40	1.00962	0.243073	0.0379616	41	0.938758	0.214408	0.0261941	67	0.931123	0.22838	0.0305186	56	0.947701	0.268195	0.0343389	61	0.995292	0.305142	0.0367347	70	hypothetical protein
VC0843		0.980793	0.158263	0.0117312	183	1.00273	0.146329	0.0101218	209	0.96911	0.151567	0.0110249	194	0.936979	0.238038	0.0173607	192	0.978889	0.205938	0.0124868	283	1.01539	0.265697	0.0178324	227	tagE protein
VC0844		0.987295	0.163628	0.0142962	131	1.00277	0.146255	0.0117475	155	0.970603	0.189165	0.0158744	144	1.0084	0.164217	0.0134082	152	0.997292	0.188963	0.0131338	211	1.01237	0.27297	0.0198033	193	accessory colonization factor AcfA
VC0845		0.994263	0.157622	0.00527166	903	0.99271	0.143647	0.0043914	1077	0.99347	0.147979	0.00485764	956	1.01383	0.128586	0.00411595	995	1.00671	0.173883	0.00482821	1344	1.02128	0.231083	0.00662949	1254	hypothetical protein
VC0846		0.947491	0.272431	0.0302701	81	0.987097	0.241353	0.0247623	95	0.978985	0.222351	0.0226936	98	0.972355	0.23292	0.0240239	94	0.968517	0.264691	0.0236747	126	0.969788	0.316401	0.0286456	123
VC0847		0.973797	0.182332	0.022111	68	0.961095	0.195848	0.0207599	89	0.927772	0.314285	0.0402401	62	0.990802	0.238351	0.0278969	73	1.02368	0.210171	0.0202238	112	1.00843	0.343359	0.0393859	77	phage family integrase
VC0848	smpB	0.681202	0.322761	0.107587	9	0.745323	0.321639	0.107213	9	0.487926	0.437086	0.106009	17	0.377262	0.462489	0.123605	14	0.0880897	0.178497	0.0564458	10	0.402822	0.400091	0.178926	5	SsrA-binding protein
VC0849		ND				ND				ND				ND				ND				ND				hypothetical protein	Essential
VC0850		ND				ND				ND				ND				ND				ND				hypothetical protein	Essential
VC0851		0.713414	0.282484	0.0631655	20	0.821639	0.294001	0.053677	30	0.543639	0.462033	0.115508	16	0.379527	0.443014	0.0944509	22	0.257353	0.413614	0.0709342	34	0.660198	0.433574	0.153291	8	small protein A
VC0852		0.989698	0.12606	0.0118587	113	0.98492	0.137546	0.0119267	133	0.973298	0.122245	0.0108904	128	0.963434	0.158697	0.0137608	133	0.996654	0.198287	0.0155789	167	0.977454	0.283499	0.0218076	170	recombination and repair protein
VC0853	ppnK	ND				ND				ND				ND				ND				ND				inorganic polyphosphate/ATP-NAD kinase	Essential
VC0854		ND				ND				ND				ND				ND				ND				heat shock protein GrpE	Essential
VC0855	dnaK	ND				ND				ND				ND				ND				ND				molecular chaperone DnaK	Essential
VC0856		ND			2	ND			1	ND			4	ND			2	ND			2	ND				dnaJ protein
VC0857		1.04848	0.131082	0.0414518	10	0.972808	0.141736	0.0409158	12	1.00795	0.0692323	0.0185031	14	1.01484	0.0613965	0.0164089	14	1.09713	0.138383	0.0345957	16	0.873386	0.369438	0.0754111	24	fimbrial assembly protein PilE, putative
VC0858		0.994679	0.185799	0.0309665	36	0.941241	0.225384	0.036562	38	0.977787	0.212655	0.0289386	54	1.00005	0.231943	0.0318598	53	0.895195	0.34311	0.048045	51	0.953419	0.320927	0.0410905	61	type IV pilin, putative
VC0859		0.989731	0.179724	0.0200937	80	0.993947	0.18813	0.0201696	87	0.975296	0.178963	0.018171	98	1.0007	0.185067	0.0188884	97	0.995341	0.196042	0.0184421	114	0.970105	0.271044	0.0243405	126	hypothetical protein
VC0860		0.990922	0.163216	0.00922552	315	0.98104	0.170543	0.0087834	380	0.990446	0.173889	0.00972068	330	0.99919	0.176363	0.00945403	358	1.01354	0.185427	0.00887015	458	1.00197	0.257989	0.0123696	446	hypothetical protein
VC0861		1.02064	0.0981395	0.0140199	49	1.00125	0.0897727	0.0119964	56	0.9984	0.130485	0.0179234	54	0.987772	0.181738	0.0249636	53	0.969092	0.25456	0.029592	74	1.04635	0.173319	0.0205691	72	type IV pilin, putative
VC0862		0.894089	0.274273	0.103665	7	0.663897	0.393755	0.139214	8	ND			4	0.88737	0.233767	0.104544	5	0.812463	0.329158	0.134378	6	ND			4	hypothetical protein
VC0863		0.964806	0.180764	0.0196066	85	0.97354	0.155529	0.0146961	112	0.997751	0.176194	0.0213667	68	0.989348	0.204709	0.0227455	81	0.957674	0.304025	0.0266648	133	0.984262	0.279955	0.02903	93	hypothetical protein
VC0864		ND				ND				ND				ND				ND				ND				yfhC protein	Essential
VC0865		ND			2	ND			1	ND			4	ND			3	ND			2	ND			3	hypothetical protein
VC0866		1.00611	0.145849	0.0140997	107	1.00094	0.10856	0.00999375	118	0.909144	0.246009	0.0222727	124	0.825353	0.323299	0.0296368	120	1.11111	0.181741	0.0143679	163	0.918285	0.276635	0.0244513	129	Slt family transglycosylase
VC0867		ND			3	ND			4	ND				ND			1	ND			3	ND			1	hypothetical protein
VC0868		ND			2	ND			4	ND			2	ND			3	0.995132	0.117502	0.0479701	6	ND				hypothetical protein
VC0869		0.976432	0.266072	0.0184046	210	0.966959	0.218591	0.0135565	262	0.155302	0.265546	0.0209279	164	0.0705024	0.185233	0.0137304	186	0.970797	0.284259	0.0170182	294	ND			4	phosphoribosylformylglycinamidine synthase
VC0870		1.03481	0.132941	0.0188007	50	1.0196	0.121293	0.0152815	63	0.964998	0.226091	0.031056	53	1.01119	0.116948	0.0154902	57	1.00268	0.229705	0.0243487	89	0.931759	0.308522	0.0379764	66	IS1004 transposase
VC0871		ND			3	ND			4	ND			3	ND			3	0.886849	0.415265	0.169531	6	0.971533	0.48177	0.215454	5	hypothetical protein
VC0872		ND			3	0.983089	0.0733295	0.0327939	5	0.685194	0.478333	0.195279	6	0.898748	0.335105	0.136806	6	0.883362	0.389641	0.123215	10	ND			2	hypothetical protein
VC0873		0.987614	0.0756131	0.0161208	22	1.0209	0.205072	0.0410145	25	0.963216	0.197513	0.0354745	31	0.999652	0.1906	0.0342328	31	1.015	0.219926	0.037717	34	0.986374	0.277557	0.0433471	41	hypothetical protein
VC0874		ND				ND				ND				ND				ND				ND				hypothetical protein	Essential
VC0875		ND				ND				ND				ND				ND				ND				prolyl-tRNA synthetase	Essential
VC0876		0.960021	0.197118	0.0420257	22	0.989339	0.139248	0.0267983	27	0.982302	0.242984	0.0404973	36	0.972512	0.24858	0.039304	40	0.980228	0.269946	0.0469916	33	0.908489	0.38871	0.0599792	42	hypothetical protein
VC0877		ND			2	ND			4	ND			2	ND			3	0.744131	0.373946	0.152663	6	ND			1	hypothetical protein
VC0878	rpmE2	1.00976	0.111438	0.0321694	12	0.973662	0.112151	0.0289572	15	1.02226	0.0905276	0.0197547	21	1.01961	0.140992	0.0315267	20	1.01792	0.108765	0.0237344	21	0.879434	0.41732	0.0957398	19	50S ribosomal protein L31 type B
VC0879	rpmJ	1.02659	0.0892407	0.0337298	7	1.02451	0.0745062	0.0333202	5	ND			3	ND			3	1.0606	0.10746	0.0480576	5	1.01886	0.103236	0.0461685	5	50S ribosomal protein L36
VC0880		0.965449	0.18512	0.0176505	110	0.968944	0.185998	0.0161891	132	0.987733	0.174857	0.0158961	122	0.970403	0.19637	0.017425	128	1.00748	0.194573	0.0150565	171	0.974037	0.319775	0.0263746	150	hypothetical protein
VC0881		0.978096	0.0745838	0.0248613	9	0.986183	0.157389	0.0594875	7	0.912845	0.394727	0.0905566	19	0.885422	0.41086	0.118605	12	1.08301	0.0942474	0.0251887	14	0.926151	0.28039	0.0597794	22	hypothetical protein
VC0882		0.952639	0.171922	0.0313885	30	1.02456	0.0623364	0.0110196	32	0.975815	0.217056	0.0425681	26	1.00146	0.232371	0.0464741	25	0.943478	0.313293	0.050167	39	0.883119	0.401697	0.0699265	33	hypothetical protein
VC0883		1.02347	0.0313654	0.00945702	11	1.04067	0.138032	0.0416182	11	0.932973	0.269734	0.0720894	14	0.95434	0.248596	0.0717634	12	1.05227	0.093645	0.024179	15	0.945142	0.243184	0.0649937	14	hypothetical protein
VC0884		0.9711	0.238609	0.0520687	21	0.987037	0.238075	0.0458176	27	0.927668	0.313735	0.0739479	18	1.01992	0.0858666	0.0192004	20	1.02302	0.266982	0.0513808	27	1.06785	0.171158	0.0323459	28	acetyltransferase-related protein
VC0885		1.00664	0.0848053	0.0346216	6	0.944225	0.0633207	0.0283179	5	1.03827	0.0747053	0.0249018	9	1.00085	0.0995458	0.0376248	7	ND			4	1.11588	0.136311	0.045437	9	hypothetical protein
VC0886		1.00145	0.123625	0.0162327	58	0.999975	0.312464	0.0373465	70	0.947627	0.247207	0.0291336	73	0.900763	0.297523	0.0348225	74	1.00078	0.223896	0.0240042	88	0.976145	0.276898	0.0290267	92	hypothetical protein
VC0887		0.980894	0.218228	0.0445456	24	0.963129	0.20959	0.0359444	34	1.00845	0.130144	0.0245949	28	0.965526	0.187593	0.0342497	30	0.945078	0.279442	0.0421275	44	0.898811	0.402263	0.0670438	36	hypothetical protein
VC0888		1.05852	0.138858	0.025352	30	0.962468	0.323983	0.0555626	34	0.902371	0.31171	0.062342	25	0.935347	0.248247	0.0486853	26	0.937492	0.279872	0.0442517	40	0.896698	0.374457	0.0720643	27	tRNA pseudouridine synthase C
VC0889		ND			4	1.00801	0.061127	0.0273368	5	1.03245	0.0799298	0.025276	10	0.996529	0.0680136	0.0226712	9	1.04736	0.0936989	0.0331275	8	1.04488	0.120984	0.0364781	11	1-deoxy-D-xylulose-5-phosphate synthase
VC0890		ND				ND				ND				ND				ND				ND				geranyltranstransferase	Essential
VC0891		0.719925	0.265969	0.0886564	9	0.729793	0.363258	0.114872	10	0.79737	0.15439	0.0488226	10	0.72835	0.286333	0.108224	7	0.418584	0.520822	0.14445	13	ND			3	exodeoxyribonuclease VII small subunit
VC0892		0.995838	0.229132	0.0324041	50	1.11052	0.130457	0.0158202	68	1.03462	0.117839	0.018183	42	0.89998	0.318182	0.0445544	51	1.00709	0.180863	0.0197338	85	0.934976	0.345103	0.0434789	63	flagellar motor protein PomA
VC0893	motB	1.08229	0.103972	0.0170929	37	1.21258	0.24845	0.0388013	41	0.995739	0.180601	0.0282051	41	1.02865	0.0987131	0.0147153	45	1.05374	0.124911	0.017665	50	1.02258	0.238072	0.0302351	62	flagellar motor protein MotB
VC0894		0.827422	0.319542	0.0471139	46	0.836991	0.232793	0.0293292	63	0.494525	0.445118	0.0600197	56	0.117858	0.299532	0.0386694	60	0.220188	0.371505	0.0415355	83	0.358063	0.414535	0.0951009	19	thiamine biosynthesis protein ThiI
VC0895		ND				ND				ND				ND				ND				ND				hypothetical protein	Essential
VC0896		1.05004	0.0941101	0.0150697	39	1.04973	0.0603154	0.00836424	52	0.999355	0.110816	0.0182181	37	0.918223	0.267744	0.0403639	44	1.01388	0.134947	0.0164864	67	0.968198	0.266147	0.0349468	58	DNA-binding transcriptional activator GcvA
VC0897		1.04793	0.115172	0.0264223	19	1.00606	0.205008	0.0427472	23	0.746929	0.411954	0.145648	8	0.988513	0.083096	0.0250544	11	1.00976	0.132678	0.0270828	24	1.06086	0.251491	0.0838304	9	hypothetical protein
VC0898	xni	0.916022	0.318784	0.0531307	36	1.01889	0.124554	0.019452	41	0.944015	0.253863	0.0463488	30	0.966899	0.231594	0.0409404	32	0.856635	0.40633	0.062698	42	0.984666	0.303114	0.0498316	37	exonuclease IX
VC0899		0.989653	0.108308	0.0150196	52	0.972209	0.135854	0.0192126	50	1.01979	0.159417	0.0185318	74	1.03528	0.082853	0.00997432	70	0.801305	0.408322	0.0484589	71	0.949733	0.212824	0.0212824	101	hypothetical protein
VC0900		0.973083	0.222082	0.0238096	87	0.989427	0.200395	0.02078	93	0.959113	0.209851	0.0204794	105	0.998057	0.150836	0.0153946	96	0.964313	0.287844	0.0267257	117	0.982286	0.220252	0.0193174	133	GGDEF family protein
VC0901		1.00094	0.196259	0.017347	128	0.971222	0.203646	0.0167964	147	0.968112	0.195701	0.0155201	161	0.982135	0.202221	0.016139	157	1.0229	0.227379	0.0166276	191	1.00128	0.240385	0.0165882	213	hypothetical protein
VC0902	queF	0.933116	0.293062	0.038817	57	0.907892	0.28163	0.0314871	80	0.928449	0.150366	0.0261753	33	0.831984	0.33488	0.0499209	45	0.905392	0.36214	0.0395127	85	0.817674	0.471585	0.0680675	48	7-cyano-7-deazaguanine reductase
VC0903		1.02448	0.0956203	0.0180705	28	0.951363	0.217726	0.0368025	35	0.948222	0.272061	0.0441341	38	0.989638	0.18987	0.031645	36	1.00644	0.259645	0.0378731	47	0.90829	0.306267	0.0446736	47	SecY interacting protein Syd
VC0904		0.906152	0.292541	0.0426715	47	0.986762	0.187926	0.0242611	60	0.995942	0.175915	0.0253911	48	0.918194	0.289934	0.039455	54	0.982241	0.278512	0.0328229	72	1.00224	0.306329	0.040935	56	hypothetical protein
VC0905	metQ	1.00839	0.190406	0.0280738	46	1.02727	0.128385	0.017471	54	0.983796	0.100747	0.0142478	50	1.00733	0.152211	0.0209077	53	0.977713	0.259803	0.0317399	67	1.0081	0.254489	0.032584	62	DL-methionine transporter substrate-binding subunit
VC0906		0.939927	0.243137	0.0443905	30	0.972034	0.213875	0.0338166	40	0.972023	0.221971	0.0310822	51	0.954547	0.249741	0.0353187	50	1.00265	0.259136	0.0318974	67	0.909828	0.298333	0.0413713	53	ABC transporter, permease protein
VC0907	metN	1.02104	0.172633	0.0206336	70	1.0166	0.107821	0.0112411	92	0.959901	0.165886	0.0227862	54	0.993906	0.128609	0.0158307	66	0.962318	0.271669	0.0266393	105	0.962613	0.318141	0.0355692	80	DL-methionine transporter ATP-binding subunit
VC0908		0.309915	0.4571	0.114275	16	0.421567	0.448004	0.0878609	26	ND			4	0	X	X	8	0	X	X	12	ND				D,D-heptose 1,7-bisphosphate phosphatase
VC0909	treR	0.992703	0.211404	0.0256365	68	0.949434	0.184452	0.0193358	91	0.948835	0.184539	0.0213087	76	0.863094	0.293962	0.0324627	82	0.96802	0.25598	0.0242966	115	1.04607	0.249996	0.0237285	111	trehalose repressor
VC0910		0.954923	0.257248	0.0285831	81	1.01791	0.133678	0.0132361	102	0.966507	0.232723	0.0266952	77	0.95612	0.25576	0.0280734	83	0.992446	0.201469	0.0181658	128	0.93238	0.305433	0.031503	94	trehalose(maltose)-specific PTS system components IIBC
VC0911		0.609593	0.449941	0.0562427	64	0.851722	0.349125	0.0363988	92	0.48642	0.435872	0.0809394	29	0.408441	0.456587	0.0731124	39	0.0697126	0.212706	0.0200988	116	0.454084	0.552755	0.142721	15	trehalose-6-phosphate hydrolase
VC0912		ND			2	ND			3	ND				ND			1	ND				ND				hypothetical protein
VC0913		1.0265	0.174815	0.0190739	84	1.01773	0.133716	0.0130493	105	0.984359	0.161799	0.0199161	67	1.01121	0.107901	0.0125433	74	1.00194	0.22537	0.019469	135	1.01122	0.285378	0.0283962	101	hypothetical protein
VC0914		1.00039	0.187046	0.0133946	197	0.993669	0.202021	0.0128543	247	0.974425	0.208477	0.0151644	194	0.98738	0.151374	0.0104458	214	0.997206	0.226631	0.0133312	296	0.945684	0.311162	0.0197588	257	multidrug resistance protein, putative
VC0915		1.01754	0.0868899	0.027477	10	1.07282	0.221224	0.0667014	11	1.02775	0.133088	0.0305325	19	0.995274	0.18795	0.0455845	17	0.975706	0.225178	0.0581406	15	0.955357	0.272167	0.0608584	20	hypothetical protein
VC0916		1.00928	0.140552	0.011077	162	1.01282	0.098653	0.00674378	214	0.998846	0.138782	0.0107715	172	0.999177	0.148438	0.0107406	193	0.970197	0.211366	0.0129112	278	1.00162	0.289677	0.0191843	234	phosphotyrosine protein phosphatase
VC0917		0.99076	0.192805	0.0190905	102	1.00391	0.131033	0.0118632	122	0.9921	0.173595	0.0170224	104	0.976339	0.215163	0.0206088	110	1.04768	0.125464	0.010566	144	1.00346	0.282724	0.0241548	138	UDP-N-acetylglucosamine 2-epimerase
VC0918	wecC	0.997378	0.195655	0.0209764	87	1.00572	0.233547	0.0230121	103	0.997315	0.177684	0.0170977	109	1.00712	0.155925	0.0152167	105	1.0145	0.175935	0.0149766	139	0.987406	0.270258	0.0224437	147	UDP-N-acetyl-D-mannosamine dehydrogenase
VC0919		0.964851	0.234176	0.0379883	38	1.03085	0.111737	0.0183695	37	1.00205	0.0943586	0.0126092	56	0.977634	0.184815	0.0253863	53	1.02306	0.195032	0.025609	58	0.96589	0.258967	0.0305196	73	serine acetyltransferase-related protein
VC0920		0.998323	0.177847	0.0197608	81	0.988202	0.149708	0.0152796	96	0.974909	0.159704	0.015813	103	0.991059	0.151637	0.0147983	106	0.989663	0.247862	0.021412	136	0.966457	0.344721	0.0304693	130	exopolysaccharide biosynthesis protein EpsF, putative
VC0921		0.982524	0.210999	0.0197618	114	1.00801	0.14382	0.012155	140	1.00406	0.140662	0.0132913	113	0.994128	0.149533	0.0136505	121	0.973961	0.234679	0.0178941	178	0.976411	0.300613	0.0238402	161	polysaccharide export protein, putative
VC0922		0.994017	0.162354	0.0155507	109	1.02203	0.130108	0.0108423	144	0.98761	0.2209	0.0208731	116	1.01715	0.142419	0.0128415	126	0.991483	0.197792	0.0145814	187	0.991652	0.257921	0.0214934	144	hypothetical protein
VC0923		0.910591	0.306839	0.0542421	32	0.981867	0.230157	0.0378375	37	1.01316	0.0958118	0.0209079	21	1.0074	0.0644321	0.0140602	21	0.997954	0.272876	0.0402334	46	0.908602	0.312033	0.0535132	34	serine acetyltransferase-related protein
VC0924		0.97057	0.234026	0.031273	56	1.015	0.118827	0.0147386	65	0.920156	0.271039	0.0362191	56	0.951733	0.208617	0.0269324	60	1.00509	0.205878	0.022598	83	0.994259	0.30369	0.0362979	70	capK protein, putative
VC0925		0.992973	0.183139	0.0210075	76	0.981136	0.193257	0.0203711	90	1.00029	0.16685	0.0168544	100	1.00126	0.155912	0.0161673	93	1.00544	0.235143	0.0221204	113	0.984388	0.250812	0.0219976	130	polysaccharide biosynthesis protein, putative
VC0926		0.997884	0.222134	0.0214746	107	0.983243	0.149823	0.0131911	129	0.981738	0.199534	0.0189389	114	0.954554	0.238127	0.0222055	116	0.994314	0.217166	0.0173872	161	0.939572	0.315059	0.0260745	148	hypothetical protein
VC0927		0.980857	0.133237	0.0157021	72	0.999615	0.0792816	0.00835702	90	0.966771	0.176719	0.0201391	77	0.994286	0.0886791	0.00973379	83	0.985156	0.253637	0.0231538	121	0.950905	0.339304	0.0339304	101	UDP-N-acetyl-D-mannosamine transferase
VC0928		0.981152	0.217071	0.0152354	205	0.992867	0.183425	0.0116947	247	0.969977	0.184961	0.0136727	187	0.986508	0.166633	0.0117828	201	0.972176	0.246606	0.0146852	294	0.9857	0.31028	0.0206853	230	hypothetical protein
VC0929		0.999004	0.151782	0.00870528	306	1.00473	0.152152	0.00807538	358	0.996632	0.148611	0.00828178	325	1.0008	0.149992	0.00824428	334	1.00807	0.183868	0.00869666	463	0.994739	0.22822	0.0110058	435	hypothetical protein
VC0930		0.99014	0.162672	0.0153029	113	0.996857	0.235549	0.0196291	144	0.980162	0.196223	0.017144	133	0.99289	0.158489	0.0134915	138	0.989549	0.220055	0.0162669	188	1.00493	0.232209	0.0181325	165	hemolysin-related protein
VC0931		0.985533	0.22452	0.0247941	82	0.97873	0.201463	0.0203508	98	0.945071	0.233583	0.0267938	76	0.985992	0.149967	0.0163627	85	0.999565	0.259888	0.0235291	124	0.959979	0.294041	0.0282941	108	hypothetical protein
VC0932		0.955199	0.274436	0.0708591	15	0.99297	0.177118	0.0417472	18	1.03985	0.0567344	0.0137601	17	0.968086	0.250835	0.0647652	15	1.05248	0.209362	0.0468147	20	0.89797	0.29807	0.0621519	23	hypothetical protein
VC0933		0.964271	0.22875	0.0251085	83	0.99741	0.132915	0.0132255	101	0.977579	0.215393	0.0233626	86	0.999587	0.178856	0.018647	92	1.01251	0.204177	0.0181178	129	1.01692	0.268192	0.0240844	126	hypothetical protein
VC0934		0.963184	0.215	0.0211845	103	1.00243	0.14264	0.0123685	133	0.99545	0.176163	0.0162171	120	0.992673	0.167065	0.0144322	135	0.987028	0.20448	0.015637	173	0.979834	0.264567	0.0216018	151	capsular polysaccharide biosynthesis glycosyltransferase, putative
VC0935		1.01469	0.150781	0.0188476	64	0.99011	0.142547	0.0152826	87	1.00055	0.183427	0.0231096	64	1.01198	0.177563	0.0205032	75	0.948919	0.334139	0.0318589	112	1.03618	0.224869	0.0237033	91	hypothetical protein
VC0936		1.00482	0.0824534	0.0153112	29	0.997968	0.107899	0.0187828	33	0.969927	0.197605	0.0343987	33	1.03672	0.0563917	0.00981653	33	1.03531	0.121671	0.0183425	44	1.02809	0.217094	0.0323625	45	polysaccharide export-related protein
VC0937		0.948235	0.242069	0.0219159	123	0.966024	0.193006	0.0153064	160	0.980139	0.182456	0.0179779	104	0.978495	0.215966	0.019473	124	1.01852	0.214625	0.0162707	179	0.949212	0.339341	0.0290983	137	exopolysaccharide biosynthesis protein, putative
VC0938		0.99353	0.15232	0.0193446	62	0.981721	0.201313	0.0234022	74	0.972347	0.210978	0.0261686	65	0.92965	0.290376	0.0344613	71	1.01766	0.234346	0.0262007	80	1.02699	0.292822	0.0325358	81	hypothetical protein
VC0939		0.931466	0.224995	0.0410782	30	0.964401	0.129045	0.0228122	32	0.950955	0.235716	0.0359464	43	0.979337	0.241959	0.0377876	41	0.931367	0.318154	0.0479635	44	0.985556	0.320902	0.0436692	54	hypothetical protein
VC0940		1.03201	0.108336	0.0188588	33	0.992853	0.0998815	0.0166469	36	0.903404	0.272541	0.0524505	27	1.00085	0.0670886	0.0122486	30	0.978065	0.22725	0.0324642	49	1.00636	0.336507	0.0525536	41	hypothetical protein
VC0941	glyA	0.86867	0.304702	0.0377936	65	0.377442	0.476207	0.049117	94	0.208722	0.333121	0.0382116	77	0.063421	0.214146	0.023794	82	0.175983	0.371041	0.0446681	72	0.583236	0.457227	0.186662	6	serine hydroxymethyltransferase
VC0942		0.928619	0.27336	0.0758163	13	0.997558	0.0732444	0.0172639	18	0.896311	0.286419	0.0694668	17	0.908617	0.2616	0.0616596	18	0.85705	0.356948	0.0761016	22	1.07536	0.134952	0.029449	21	hypothetical protein
VC0943		ND				ND				ND				ND				ND				ND				lipoyl synthase	Essential
VC0944	lipB	ND			2	0	X	X	6	ND			4	ND			4	ND				ND				lipoyltransferase	Essential
VC0945		ND				ND				ND				ND				ND				ND				hypothetical protein	Essential
VC0946		ND			4	1.05052	0.086949	0.0388848	5	0.949337	0.107727	0.040717	7	0.961921	0.0668911	0.0273082	6	1.04297	0.0331634	0.011725	8	0.985368	0.129178	0.0456714	8	hypothetical protein
VC0947		ND			3	ND			4	ND				ND				ND				ND				D-alanyl-D-alanine carboxypeptidase
VC0948		1.04503	0.105053	0.0210105	25	1.02514	0.115067	0.0213674	29	0.707457	0.387914	0.0720339	29	0.788807	0.322889	0.0610203	28	0.86444	0.311348	0.0511853	37	0.635615	0.391851	0.0799863	24	rare lipoprotein A, putative
VC0949		ND				ND				ND				ND				ND				ND				rod shape-determining protein RodA	Essential
VC0950		ND				ND				ND				ND				ND				ND				penicillin-binding protein 2	Essential
VC0951		0.778384	0.359211	0.146647	6	0.937302	0.0824607	0.0238044	12	0.808546	0.417426	0.170413	6	0.54662	0.493291	0.16443	9	0.661432	0.551953	0.130096	18	ND			4	SPOUT methyltransferase superfamily protein
VC0952		ND			2	ND			4	ND			2	ND			3	0.62429	0.446029	0.182091	6	ND			1	hypothetical protein
VC0953	holA	ND			2	ND			4	ND			2	ND			3	1.04849	0.151327	0.0617791	6	ND			1	DNA polymerase III subunit delta
VC0954		ND				ND				ND				ND				ND				ND				rare lipoprotein B	Essential
VC0955		ND				ND				ND				ND				ND				ND				hypothetical protein	Essential
VC0956	leuS	ND				ND				ND				ND				ND				ND				leucyl-tRNA synthetase	Essential
VC0957		0.987982	0.283868	0.0536461	28	1.018	0.0838974	0.0132653	40	0.978115	0.232307	0.0474194	25	0.993034	0.0935679	0.0162881	33	1.01215	0.249927	0.03433	53	0.95262	0.303838	0.0499507	37	hypothetical protein
VC0958	lnt	ND			2	ND			1	0.971245	0.0993419	0.0375477	7	0.945228	0.100495	0.0449427	5	ND			2	1.04565	0.14387	0.0508657	8	apolipoprotein N-acyltransferase
VC0959		0.993444	0.0737551	0.020456	13	1.02912	0.092895	0.030965	9	0.603323	0.330463	0.0648091	26	0.530518	0.345185	0.0735936	22	0.705763	0.372721	0.0903982	17	0.631917	0.317662	0.105887	9	hemolysin, putative
VC0960		ND			1	ND			1	ND			2	ND			2	ND			2	0.974645	0.309194	0.126228	6	putative metalloprotease
VC0961		ND			3	0.629818	0.375655	0.167998	5	ND			4	ND			3	ND			4	ND			3	phoH family protein
VC0962		0.997838	0.143085	0.0173516	68	0.993166	0.159477	0.0171968	86	0.977461	0.13522	0.0137295	97	0.922662	0.241604	0.0242821	99	1.0664	0.184029	0.0177082	108	0.991595	0.241913	0.0227572	113	hypothetical protein
VC0963		ND				ND				ND				ND				ND				ND				2-octaprenyl-3-methyl-6-methoxy-1,4-benzoquinol hydroxylase	Essential
VC0964		0.727325	0.40209	0.107463	14	0.85361	0.260253	0.0631207	17	ND			4	0	X	X	5	0.108597	0.364558	0.0941284	15	ND			3	glucose-specific PTS system component
VC0965		0.73238	0.363787	0.0399308	83	0.834223	0.288593	0.0270292	114	0.220047	0.367795	0.0439599	72	0.0692593	0.228608	0.025093	84	0.16355	0.347815	0.0302734	138	0.172712	0.322795	0.093183	12	phosphoenolpyruvate-protein phosphotransferase
VC0966		0.692471	0.435796	0.108949	16	0.632009	0.444011	0.101863	19	0	X	X	15	0	X	X	17	0.232152	0.360505	0.0786687	21	ND				phosphocarrier protein HPr
VC0967		0.61978	0.409967	0.136656	9	0.917626	0.183942	0.0554605	11	0.413785	0.408276	0.1231	11	0.194104	0.338958	0.1022	11	0.488434	0.497623	0.120691	17	ND			2	hypothetical protein
VC0968		0.893104	0.33442	0.0487801	47	0.943102	0.254459	0.0306333	69	1.00952	0.243218	0.0518542	23	0.996068	0.13653	0.0218624	39	0.740824	0.407473	0.0467404	76	0.95234	0.338396	0.0535051	40	cysteine synthase A
VC0969		0.989182	0.138905	0.0173631	64	0.986671	0.170134	0.0190215	80	0.930918	0.279734	0.0349667	65	0.906911	0.298494	0.0354247	71	0.977922	0.211775	0.0209688	104	0.976988	0.227831	0.0242869	89	putative sulfate transport protein CysZ
VC0970		0.0150982	0.114303	0.0238339	23	0.0745246	0.260101	0.0416494	39	ND			4	0	X	X	8	0	X	X	5	ND				cell division protein ZipA
VC0971	ligA	ND				ND				ND				ND				ND				ND				NAD-dependent DNA ligase LigA	Essential
VC0972		0.987207	0.174118	0.0217648	64	0.990273	0.220626	0.0258223	73	0.943682	0.267209	0.0280112	92	0.981231	0.215622	0.0231171	88	0.983675	0.20273	0.0200733	103	1.00255	0.236935	0.0236935	101	porin, putative
VC0973		0.983832	0.245291	0.0354047	48	0.993488	0.203949	0.0243766	70	0.935483	0.292648	0.0436254	45	0.977466	0.226196	0.0313678	52	0.978938	0.269102	0.0291882	85	0.908714	0.282312	0.0350165	65	hypothetical protein
VC0974		1.01423	0.0783286	0.0170927	21	1.0157	0.0749604	0.0156303	23	1.00702	0.188324	0.036243	27	0.955608	0.256104	0.050226	26	1.02806	0.0948733	0.0167714	32	1.02274	0.240473	0.0385064	39	MerR family transcriptional regulator
VC0975		1.04271	0.114129	0.0168274	46	1.06289	0.136765	0.0182761	56	0.990887	0.193565	0.0240088	66	0.983873	0.193864	0.023863	66	1.02166	0.241426	0.0271625	79	0.970487	0.272944	0.0296049	85	hypothetical protein
VC0976		1.01765	0.0967321	0.0154895	39	0.940786	0.240617	0.0318705	57	1.03175	0.158672	0.0236535	46	1.04091	0.0880429	0.0124511	50	0.992328	0.227331	0.0259068	81	0.916676	0.340852	0.0440038	60	hypothetical protein
VC0977		0.967148	0.237655	0.0294775	65	0.985	0.213899	0.024699	75	0.900046	0.294016	0.0361908	67	0.960654	0.241033	0.028406	72	0.98643	0.246835	0.0257343	92	0.961476	0.280198	0.032141	76	hypothetical protein
VC0978		1.03421	0.114462	0.026979	18	0.963925	0.307471	0.0641122	23	0.858496	0.28301	0.0784929	13	0.995134	0.16288	0.0373672	19	1.0063	0.139522	0.0268509	27	0.980251	0.251498	0.0548813	21	hypothetical protein
VC0979		0.956112	0.206007	0.0270501	58	0.98253	0.102739	0.0107113	92	0.923276	0.30979	0.0456761	48	0.991469	0.194104	0.0240757	67	0.950873	0.298599	0.0277243	120	0.918188	0.420615	0.0513863	68	short chain dehydrogenase
VC0980		0.997991	0.174863	0.0218579	64	0.985343	0.17435	0.0180792	93	0.989384	0.124962	0.0154996	67	0.903075	0.268916	0.0296968	83	0.942521	0.282544	0.0256858	125	0.898098	0.388942	0.0412278	89
VC0981		1.04877	0.0718672	0.0125105	33	1.00197	0.20278	0.0320623	40	0.946701	0.245021	0.0387412	40	1.00462	0.186858	0.0288328	42	0.985222	0.247327	0.0333495	55	0.963749	0.333227	0.0471254	51	phosphodiesterase
VC0982		1.03132	0.0708809	0.0204615	12	0.986543	0.0879739	0.0207356	18	1.00121	0.0792218	0.0219722	13	0.988543	0.0701036	0.0175259	16	0.937024	0.292987	0.0574595	26	1.08829	0.123075	0.0290091	18	selenoprotein W-related protein
VC0983		1.01044	0.121398	0.0221641	30	0.956721	0.215369	0.0324681	44	0.575388	0.418978	0.0936863	20	0.228717	0.39927	0.079854	25	0.837023	0.418815	0.0631388	44	0.533882	0.446353	0.168706	7	regulatory protein ToxS
VC0984		0.841178	0.36189	0.0611705	35	1.03423	0.150277	0.0212524	50	0.0195382	0.108156	0.023059	22	0	X	X	30	0.7418	0.417461	0.0562904	55	ND				cholera toxin transcriptional activator
VC0985		1.01725	0.17045	0.0227773	56	1.02722	0.100782	0.0115605	76	0.911321	0.29227	0.0462119	41	0.923846	0.184537	0.0255907	52	0.970316	0.233216	0.0243145	93	0.936338	0.346606	0.0426642	66	heat shock protein 90
VC0986	adk	ND				ND				ND				ND				ND				ND				adenylate kinase	Essential
VC0987	hemH	ND				ND				ND				ND				ND				ND				ferrochelatase	Essential
VC0988	tppB	1.01092	0.122665	0.0184924	44	0.939865	0.319042	0.04756	45	0.993028	0.236233	0.0310189	58	1.06832	0.166779	0.0226958	54	0.97998	0.250178	0.0307948	66	0.949407	0.286694	0.032886	76	putative tripeptide transporter permease
VC0989		ND			3	ND			4	ND				ND			1	ND			3	ND			2	hypothetical protein
VC0990	rfaH	1.03937	0.0509935	0.0153751	11	0.982936	0.158469	0.0423525	14	0.752332	0.413367	0.137789	9	0.833619	0.318904	0.0961531	11	1.06694	0.162272	0.0372278	19	0.668855	0.49805	0.176087	8	transcriptional activator RfaH
VC0991	asnB	0.956603	0.218271	0.0260884	70	0.99412	0.10774	0.0111125	94	0.964698	0.246332	0.0300943	67	0.977171	0.170339	0.019669	75	0.88531	0.335367	0.0312731	118	0.922586	0.317876	0.0333224	92	asparagine synthetase B
VC0992		0.929661	0.243341	0.0297288	67	0.957441	0.299245	0.0334566	80	0.954392	0.224495	0.026457	73	0.975478	0.19793	0.0222689	79	0.940758	0.281281	0.0290119	94	0.977672	0.272994	0.0291012	88	glutathione-regulated potassium-efflux system protein KefB, putative
VC0993		0.922853	0.272902	0.0426201	41	0.964546	0.126883	0.0177671	51	0.825159	0.358083	0.0614107	34	0.780201	0.354507	0.0560524	40	0.691352	0.43629	0.0549674	63	0.711676	0.420847	0.0768358	30	N-acetylglucosamine repressor
VC0994	nagA	0.970107	0.19603	0.0282944	48	0.983517	0.232619	0.0313663	55	0.945877	0.254035	0.0310353	69	0.910954	0.262093	0.0335575	62	0.82192	0.411708	0.0466167	78	0.854228	0.300669	0.0359368	71	N-acetylglucosamine-6-phosphate deacetylase
VC0995		0.931506	0.242823	0.0218062	125	1.00742	0.121115	0.00975976	155	0.920269	0.251772	0.0237902	113	0.914518	0.234372	0.0209628	126	0.953617	0.293231	0.0224898	178	0.926115	0.330788	0.0281586	140	PTS system, N-acetylglucosamine-specific IIABC component
VC0996		ND				ND				ND				ND				ND				ND				hypothetical protein	Essential
VC0997		ND				ND				ND				ND				ND				ND				glutaminyl-tRNA synthetase	Essential
VC0998		0.95803	0.215157	0.0151384	204	0.946231	0.217357	0.0137195	252	0.927856	0.202361	0.0137689	220	0.928638	0.200423	0.0135434	225	0.953794	0.325503	0.0188876	313	0.92299	0.33044	0.0217413	238	hypothetical protein
VC0999	truA	0.942306	0.22546	0.038666	34	0.995598	0.0903019	0.0129003	49	0.814865	0.351788	0.0612384	33	0.685463	0.379091	0.0592041	41	0.555006	0.47543	0.063532	56	0.872706	0.365191	0.0592419	38	tRNA pseudouridine synthase A
VC1000		ND				ND				ND				ND				ND				ND				acetyl-CoA carboxylase subunit beta	Essential
VC1001		ND				ND				ND				ND				ND				ND				folylpolyglutamate synthase/dihydrofolate synthase	Essential
VC1002		0.994555	0.204469	0.0546468	14	1.03473	0.101931	0.0294248	12	0.902525	0.179676	0.0392085	21	0.86015	0.322345	0.0739511	19	0.948916	0.158601	0.042388	14	0.791795	0.282645	0.07554	14	dedD protein
VC1003		0.994953	0.097711	0.0184656	28	0.987524	0.185714	0.0333552	31	0.143946	0.282017	0.0588046	23	0.071061	0.172637	0.033224	27	0.883104	0.329545	0.0485888	46	ND			1	bacteriocin (colicin V )production protein
VC1004		0.973493	0.194083	0.0310782	39	0.989294	0.241872	0.0338688	51	0.0516193	0.138436	0.0248639	32	0.0113794	0.0656551	0.0110977	35	0.906748	0.328281	0.0407182	65	ND				amidophosphoribosyltransferase
VC1005		0.999403	0.125944	0.0183708	47	1.01963	0.145016	0.0197342	54	0.96795	0.253169	0.0400296	40	0.957119	0.215044	0.033182	42	0.947143	0.307973	0.0365497	71	0.839298	0.379989	0.0521955	53	hypothetical protein
VC1006		0.951869	0.0899977	0.0206469	19	0.990261	0.10918	0.021412	26	0.982946	0.222977	0.0498592	20	0.996615	0.1846	0.0376813	24	0.801063	0.393524	0.0630142	39	0.834869	0.440638	0.0864162	26	ribonuclease T
VC1007		0.885541	0.335062	0.111687	9	0.951214	0.195925	0.0543399	13	ND			2	1.06455	0.0364261	0.0162902	5	0.723995	0.442113	0.127627	12	ND			3	hypothetical protein
VC1008		1.04461	0.240087	0.044583	29	1.15049	0.152826	0.0266036	33	1.04827	0.107435	0.0181599	35	1.01365	0.0886087	0.0149776	35	0.89826	0.265671	0.0400515	44	0.859454	0.340667	0.049171	48	sodium-type flagellar protein MotY
VC1009		0.892316	0.298804	0.0597608	25	1.00618	0.0738571	0.0124841	35	1.01719	0.141157	0.0315636	20	0.995136	0.0994706	0.0195078	26	1.0151	0.195212	0.0291005	45	0.905944	0.314017	0.0563991	31	hypothetical protein
VC1010		0.977198	0.278045	0.0695113	16	1.00526	0.220954	0.0494069	20	0.916171	0.299571	0.0638687	22	0.871532	0.354944	0.074011	23	0.825829	0.398158	0.0752447	28	0.930338	0.353843	0.0791216	20	lactoylglutathione lyase
VC1011		1.01353	0.0821946	0.0167779	24	0.954622	0.202442	0.0397022	26	0.946516	0.202242	0.0382201	28	0.903832	0.220195	0.0408892	29	1.01993	0.280267	0.0487882	33	0.875966	0.38849	0.0638674	37	endonuclease III
VC1012		ND			2	ND			4	ND			2	ND			3	0.984308	0.0522441	0.0213285	6	ND			3	SoxR-reducing system protein RsxE
VC1013		ND				ND				ND				ND				ND				ND				electron transport complex protein RnfG	Essential
VC1014	rnfD	ND			3	ND			4	ND				ND			1	ND			3	ND			2	electron transport complex protein RnfD
VC1015		0.974278	0.209319	0.0936102	5	0.971151	0.199615	0.0814925	6	ND			4	ND			4	0.74651	0.366252	0.163793	5	ND			3	electron transport complex protein RnfC
VC1016		ND			2	ND			2	0.897926	0.363813	0.121271	9	0.66256	0.537615	0.179205	9	ND			2	0.575278	0.360382	0.161168	5	electron transport complex protein RnfB
VC1017		ND				ND				ND				ND				ND				ND				Na(+)-translocating NADH-quinone reductase subunit E	Essential
VC1018	uvrB	0.998263	0.202429	0.0211047	92	0.992476	0.200489	0.0189444	112	0.939587	0.255554	0.0242561	113	0.913386	0.255637	0.0248297	106	0.86521	0.345251	0.0298252	139	0.938667	0.315058	0.0284078	124	excinuclease ABC subunit B
VC1020		ND			3	ND			2	0.997064	0.0635492	0.0259439	6	ND			3	ND			2	ND			4	hypothetical protein
VC1021		0.752932	0.380456	0.0554952	47	0.867165	0.293668	0.0385605	58	0.0826812	0.194197	0.0348788	32	0.0383589	0.141821	0.0213803	44	0.66454	0.44316	0.0572117	60	ND			1	LuxO repressor protein
VC1022		0.832623	0.21796	0.0889817	6	0.97089	0.220796	0.0735988	9	0.0870859	0.224164	0.067588	11	0	X	X	11	0.891557	0.435537	0.116402	14	ND				phosphorelay protein
VC1023		0.978422	0.219543	0.0351551	39	1.01362	0.140872	0.0201246	49	0.991609	0.234701	0.0402509	34	1.00579	0.174123	0.0275313	40	1.01205	0.236649	0.0316236	56	1.00399	0.254722	0.0393045	42	hypothetical protein
VC1024	moaA	0.954053	0.243168	0.0319295	58	0.976707	0.189145	0.0221378	73	0.896512	0.324514	0.0513102	41	0.898369	0.286504	0.0397309	52	0.772393	0.405224	0.0455912	80	0.943373	0.361292	0.0482796	56	molybdenum cofactor biosynthesis protein A
VC1025		0.968039	0.195869	0.0351792	31	1.00195	0.0902392	0.0146387	38	0.94564	0.211	0.0439965	23	0.862877	0.30631	0.0568804	29	0.87887	0.316643	0.0461871	47	0.981644	0.330135	0.053555	38	molybdenum cofactor biosynthesis protein B
VC1026	moaC	0.931423	0.225459	0.0361023	39	0.997352	0.219543	0.0338762	42	0.821987	0.324879	0.0454922	51	0.834847	0.321219	0.0473612	46	0.841602	0.361772	0.0496932	53	0.878176	0.376471	0.0587949	41	molybdenum cofactor biosynthesis protein C
VC1027	moaD	0.871108	0.329026	0.109675	9	1.07437	0.153482	0.0485354	10	0.651579	0.427362	0.118529	13	0.694502	0.391246	0.0978115	16	0.773685	0.389547	0.117453	11	0.755615	0.441982	0.147327	9	molybdopterin synthase small subunit
VC1028		0.996508	0.0788062	0.0168015	22	0.919944	0.209785	0.0437431	23	0.911253	0.228929	0.036658	39	0.853937	0.327938	0.056241	34	0.867467	0.273015	0.0475259	33	1.00882	0.227991	0.0396881	33	molybdenum cofactor biosynthesis protein E
VC1029		0.984716	0.246326	0.02754	80	0.969345	0.213863	0.020391	110	0.921323	0.315986	0.0375007	72	0.967916	0.248475	0.0263382	89	0.933656	0.343884	0.0298185	139	0.882687	0.361197	0.0380735	90	GGDEF family protein
VC1030		ND				ND				ND				ND				ND				ND				hypothetical protein	Essential
VC1031		1.05905	0.144454	0.0294865	24	1.0625	0.188221	0.0318152	35	1.02727	0.130365	0.027183	23	1.04246	0.0811558	0.015337	28	0.97367	0.28488	0.043958	42	0.863033	0.341536	0.0623557	30	inosine monophosphate dehydrogenase-related protein
VC1032		0.909465	0.279623	0.0843096	11	0.898754	0.230538	0.0515498	20	0.589628	0.447332	0.182622	6	0.898883	0.306428	0.096901	10	0.633437	0.460999	0.0982852	22	0.710679	0.476335	0.16841	8	hypothetical protein
VC1033	zntA	0.778515	0.323248	0.0407255	63	0.900657	0.270023	0.0311796	75	0.881851	0.360562	0.0371891	96	0.905928	0.337804	0.03601	89	0.100351	0.230843	0.0233187	100	0.167641	0.307348	0.0331422	87	zinc/cadmium/mercury/lead-transporting ATPase
VC1034		0.996628	0.190051	0.0277219	47	1.02408	0.188599	0.0259061	53	0.957736	0.201258	0.0255597	62	0.984731	0.151632	0.018954	64	0.973888	0.241753	0.0293168	68	0.996836	0.208556	0.0237671	78	uridine phosphorylase
VC1035		0.974528	0.14534	0.0265353	30	0.995352	0.176806	0.0290667	37	0.956741	0.224037	0.0330325	47	0.945514	0.267219	0.0385697	48	0.965637	0.259239	0.0349557	55	0.995846	0.249802	0.0333812	56	hypothetical protein
VC1036	metG	0.985072	0.0234153	0.00955926	6	0.801971	0.342289	0.108241	10	1.05001	0.0551764	0.0183921	9	0.751366	0.317253	0.112166	8	0.961857	0.0964197	0.0304906	10	0.814447	0.380666	0.0982877	15	methionyl-tRNA synthetase
VC1037		1.01367	0.164665	0.0235235	49	0.978072	0.21241	0.0291768	53	0.982468	0.106877	0.0166914	41	0.968949	0.172179	0.0253864	46	0.903196	0.303875	0.0392301	60	0.995989	0.278484	0.0362555	59	mrp protein
VC1038		0.646432	0.365608	0.0627012	34	0.303494	0.447649	0.0660023	46	0.93428	0.279603	0.0502182	31	0.749188	0.413817	0.0689696	36	0.611322	0.456342	0.0782621	34	0.832455	0.374661	0.0633292	35	uridine kinase
VC1039		0.930639	0.255665	0.0248324	106	0.925204	0.232362	0.0209513	123	0.795582	0.283059	0.0265109	117	0.815687	0.339417	0.0316508	117	0.71222	0.417371	0.0338533	157	0.834017	0.397778	0.0424033	89	asmA protein
VC1040		1.04153	0.141821	0.0578981	6	1.02582	0.0295126	0.0131984	5	1.01964	0.0489683	0.0218993	5	ND			4	1.02804	0.176244	0.0788188	5	1.01045	0.266734	0.119287	5	cob(I)yrinic acid a,c-diamide adenosyltransferase
VC1041		0.987114	0.227111	0.0463588	24	0.994105	0.262378	0.0487224	29	0.878408	0.340134	0.0680267	25	0.888821	0.303213	0.061893	24	0.923563	0.348056	0.0605888	33	0.955807	0.318094	0.0636188	25	phosphotyrosine protein phosphatase
VC1042		1.02504	0.139366	0.0217652	41	0.97469	0.159506	0.0209441	58	0.963456	0.242108	0.0387683	39	0.928953	0.301681	0.0440047	47	0.944156	0.309959	0.0350959	80	0.945953	0.370145	0.0534258	48	long-chain fatty acid transport protein
VC1043		0.919375	0.279205	0.051847	29	0.881029	0.370398	0.0644779	33	0.975091	0.260928	0.0454217	33	1.00742	0.212804	0.0388525	30	0.646309	0.477958	0.0807897	35	0.496964	0.404283	0.0664637	37	long-chain fatty acid transport protein
VC1044		0.862313	0.300397	0.0458101	43	0.9065	0.264824	0.0344772	59	0.692308	0.394214	0.0732037	30	0.737856	0.391746	0.065291	36	0.342975	0.429942	0.0546027	62	0.37226	0.444876	0.0908099	24	hypothetical protein
VC1045		0.994461	0.143436	0.019891	52	1.01884	0.0927632	0.0111674	69	0.750255	0.353352	0.0667772	28	0.824804	0.354287	0.0546677	42	0.914327	0.317319	0.0373964	73	0.875216	0.450393	0.0721207	39	RNA polymerase sigma factor
VC1046	fadI	0.990031	0.18275	0.0193714	89	1.02813	0.123785	0.0112531	121	0.977418	0.206651	0.0271346	58	0.891426	0.286553	0.0342496	70	0.967626	0.259264	0.0222317	142	0.93298	0.303485	0.0323516	88	3-ketoacyl-CoA thiolase
VC1047	fadJ	0.994405	0.173625	0.0159835	118	0.972685	0.15515	0.0133532	135	0.990851	0.175759	0.0139386	163	0.871656	0.328733	0.0264045	159	0.947531	0.232769	0.0167551	197	0.965255	0.261699	0.0199543	175	multifunctional fatty acid oxidation complex subunit alpha
VC1048		0.919067	0.329	0.0507658	42	1.00287	0.300885	0.0409453	54	0.947094	0.311504	0.0486488	41	0.963856	0.205645	0.0325153	40	0.947073	0.25514	0.0326674	61	0.969599	0.324363	0.0488995	44	hypothetical protein
VC1049		1.012	0.159338	0.0265563	36	0.988837	0.23067	0.0379219	37	0.894725	0.207757	0.0328492	40	0.772749	0.340653	0.0560029	37	0.987945	0.244317	0.0349024	49	1.02974	0.28862	0.0487858	35	LysR family transcriptional regulator
VC1050		0.930199	0.222793	0.0321575	48	0.888069	0.229807	0.0291855	62	1.01288	0.0959067	0.0169541	33	0.920437	0.288282	0.0461621	39	0.65334	0.418459	0.0511229	67	0.963328	0.40121	0.0585225	47	response regulator
VC1051		ND			2	ND			4	ND			2	ND			3	0.861596	0.409159	0.167038	6	ND			3	hypothetical protein
VC1052		0.939118	0.297573	0.085902	12	0.84607	0.303187	0.0914142	11	1.02004	0.0738224	0.0233447	10	0.739464	0.437587	0.131937	11	1.03556	0.152279	0.0459137	11	0.73382	0.407123	0.128744	10	hypothetical protein
VC1053		1.01848	0.167044	0.036452	21	1.0576	0.14121	0.0276936	26	0.91524	0.27807	0.0457144	37	0.811704	0.374299	0.0623832	36	0.750062	0.446838	0.0715514	39	0.826336	0.339225	0.0665275	26	adenine phosphoribosyltransferase
VC1054		ND				ND				ND				ND				ND				ND				DNA polymerase III subunits gamma and tau	Essential
VC1055		1.04175	0.169856	0.0641997	7	0.777861	0.355324	0.112363	10	0.822972	0.121618	0.0459673	7	0.486732	0.431862	0.193134	5	0.306301	0.28679	0.0955965	9	0.808571	0.384014	0.156773	6	hypothetical protein
VC1056	recR	0.935108	0.28217	0.0435397	42	0.95247	0.195727	0.0252682	60	0.819639	0.380837	0.0634728	36	0.790464	0.388747	0.0607121	41	0.65692	0.497815	0.0574828	75	0.808983	0.461197	0.0695281	44	recombination protein RecR
VC1057		1.0059	0.0431283	0.0119616	13	1.01989	0.173926	0.0434814	16	1.04803	0.174816	0.0484851	13	1.06137	0.0782796	0.0189856	17	0.878072	0.340864	0.0644172	28	0.923103	0.36809	0.078477	22	proteinase inhibitor, putative
VC1058		0.96406	0.18663	0.0320067	34	0.977495	0.129526	0.0212939	37	0.989919	0.135604	0.0209241	42	0.966457	0.210126	0.032044	43	0.991267	0.225589	0.0312835	52	0.921212	0.310448	0.0426433	54	hypothetical protein
VC1059		0.903953	0.187899	0.03685	26	0.887007	0.231002	0.0374735	38	0.783034	0.354779	0.081392	20	0.690773	0.398281	0.075268	28	0.715561	0.478076	0.0676102	50	0.811551	0.385085	0.0994285	15	short chain dehydrogenase
VC1060		0.994469	0.127992	0.0202373	40	0.990213	0.181901	0.0262551	48	0.984903	0.164952	0.0216593	59	0.987203	0.162807	0.0215644	57	0.946623	0.307445	0.0359837	73	0.979607	0.285529	0.0319231	80	putative periplasmic protease
VC1061		0.993183	0.199447	0.0297319	45	1.00945	0.202058	0.0272455	55	1.00656	0.121885	0.0172372	50	0.931141	0.241818	0.0329072	54	0.9326	0.299951	0.035851	70	0.964174	0.253255	0.0307116	68	cysteine synthase/cystathionine beta-synthase family protein
VC1062		1.02479	0.114115	0.0198648	33	0.985522	0.19413	0.030318	41	0.894855	0.357555	0.0622424	33	0.962169	0.223247	0.0382866	34	1.04737	0.13758	0.0209808	43	0.973627	0.223901	0.0358528	39	AsnC family transcriptional regulator
VC1063		1.02208	0.112214	0.0189677	35	0.993582	0.129329	0.0190685	46	0.935946	0.310568	0.0540629	33	0.999471	0.183924	0.029081	40	0.989186	0.233264	0.0314534	55	0.872297	0.41506	0.0656267	40	acyl-CoA thioesterase II
VC1064		0.963297	0.281017	0.0513065	30	1.04386	0.116679	0.0186836	39	1.04981	0.089791	0.0217775	17	0.95712	0.228511	0.0487188	22	0.905926	0.295199	0.0426083	48	0.905953	0.407209	0.0814418	25	lipoprotein-related protein
VC1065		1.02952	0.127546	0.0425153	9	1.0159	0.0693805	0.0283245	6	1.01487	0.0578746	0.016707	12	1.04312	0.070016	0.0202119	12	1.01842	0.0956574	0.0318858	9	1.01138	0.279249	0.0677279	17	methylated-DNA--protein-cysteine methyltransferase-related protein
VC1066		1.01989	0.178879	0.0223599	64	0.991894	0.201093	0.0229167	77	0.976594	0.21394	0.0356567	36	0.960062	0.223623	0.0329714	46	1.06624	0.159955	0.0177728	81	1.017	0.316803	0.0427177	55	hypothetical protein
VC1067		0.896669	0.269226	0.0392707	47	0.944743	0.20691	0.0262776	62	0.808285	0.352666	0.0604817	35	0.74659	0.380099	0.0616602	38	0.956315	0.31577	0.0382927	68	0.938087	0.407217	0.0669461	37	hypothetical protein
VC1068		1.00083	0.17381	0.0421552	17	1.06156	0.125531	0.0287988	19	0.951365	0.236944	0.0543586	19	0.935719	0.241441	0.0569082	18	0.947001	0.251118	0.0523616	23	0.978088	0.261142	0.0512142	26	ArsR family transcriptional regulator
VC1069		1.05594	0.0932568	0.0182892	26	1.02288	0.205827	0.0363853	32	0.940451	0.266951	0.0457817	34	0.969047	0.225723	0.0371086	37	1.02183	0.138309	0.0213416	42	0.993277	0.224996	0.0315057	51	glyceraldehyde-3-phosphate dehydrogenase
VC1070		1.04978	0.147172	0.0379996	15	1.0337	0.0810461	0.0172791	22	0.95652	0.242396	0.0542015	20	0.93997	0.24209	0.0516138	22	0.907768	0.277462	0.0483	33	0.815102	0.364974	0.0744999	24	phosphatase, putative
VC1071		0.968852	0.245789	0.0354766	48	1.02037	0.170889	0.02153	63	1.0084	0.136456	0.0191077	51	0.975732	0.237702	0.0329633	52	0.904241	0.396372	0.0445953	79	0.803764	0.375806	0.0439847	73	transporter, putative
VC1072		0.976015	0.0889393	0.0198874	20	1.00513	0.124122	0.026463	22	1.01856	0.0981889	0.0182332	29	0.989047	0.149691	0.0277969	29	0.944321	0.276067	0.0466639	35	0.89102	0.312418	0.0493976	40	hypothetical protein
VC1073		0.96883	0.225	0.0157532	206	0.961362	0.271242	0.0179635	229	0.987353	0.221518	0.0143288	241	0.981464	0.225204	0.0146907	241	0.995602	0.238057	0.0140277	300	0.983244	0.243042	0.0139624	309	chitinase, putative
VC1074		0.956601	0.249911	0.0441784	32	0.963628	0.249464	0.0410117	37	0.9711	0.155688	0.027522	32	1.02828	0.0758513	0.0128212	35	0.978602	0.252866	0.0361236	49	1.00253	0.251739	0.0379512	44	hypothetical protein
VC1075		1.00038	0.143788	0.0250303	33	1.03263	0.0942304	0.01437	43	1.00678	0.185722	0.0297393	39	0.989987	0.160195	0.0247186	42	0.965125	0.262085	0.0360002	53	0.935509	0.359452	0.0484684	55	hypothetical protein
VC1076		1.0288	0.0806348	0.0106803	57	1.04704	0.14672	0.018485	63	1.00754	0.148346	0.0172449	75	0.997007	0.141463	0.0166715	72	0.977843	0.230659	0.0247292	87	0.970235	0.256234	0.026289	96	AraC/XylS family transcriptional regulator
VC1077		1.03286	0.0588725	0.016995	12	0.986882	0.198218	0.0529761	14	0.922344	0.257934	0.0974897	7	1.04311	0.0634365	0.0224282	8	0.917034	0.271913	0.0679783	16	0.982329	0.375297	0.125099	9	hypothetical protein
VC1078		ND				ND				ND				ND				ND				ND				hypothetical protein	Essential
VC1079		0.913962	0.312175	0.0417162	56	0.883742	0.305969	0.0379508	65	0.981972	0.221041	0.0283013	63	0.820874	0.373666	0.04824	60	0.685663	0.46266	0.0523859	78	0.708163	0.365976	0.0468584	61	hypothetical protein
VC1080		0.926052	0.267187	0.0583049	21	0.920534	0.202902	0.042308	23	1.06564	0.0891229	0.0222807	16	1.03393	0.138602	0.0336159	17	0.951489	0.342576	0.0659289	27	0.815288	0.31577	0.0689066	21	hypothetical protein
VC1081		1.0161	0.143276	0.0206802	48	0.987606	0.212087	0.0291323	53	0.958587	0.217244	0.0285255	58	0.971608	0.208739	0.0281463	55	0.940818	0.279428	0.0322656	75	0.912129	0.304755	0.0372318	68	response regulator
VC1082		0.97136	0.0867051	0.0306549	8	0.989324	0.0782679	0.0247505	10	1.03402	0.0421482	0.0121671	12	1.04777	0.0713539	0.0205981	12	1.06568	0.107326	0.029767	13	0.981621	0.250143	0.0589593	18	response regulator
VC1083		1.02485	0.0830947	0.0166189	25	1.0011	0.18549	0.0378629	24	0.974023	0.219538	0.0323691	46	0.947154	0.253608	0.0396068	41	1.01002	0.112012	0.0172838	42	0.999169	0.1695	0.0232827	53	hypothetical protein
VC1084		1.02425	0.174188	0.0230717	57	0.972628	0.120449	0.0142946	71	0.99483	0.202401	0.0229174	79	0.988687	0.152973	0.0174329	77	0.951121	0.247022	0.024953	101	0.857507	0.327398	0.0325773	103	sensory box sensor histidine kinase
VC1085		1.00452	0.220581	0.0249758	78	1.01746	0.19068	0.0202121	89	0.950112	0.248323	0.026623	89	1.01173	0.123647	0.013491	84	1.0676	0.236151	0.0223142	113	1.03916	0.225459	0.0208437	117	sensor histidine kinase
VC1086		1.02806	0.166069	0.0219964	57	1.02057	0.197946	0.0255547	60	0.98634	0.23238	0.0283897	67	0.966594	0.240122	0.029557	66	1.02194	0.190923	0.0221943	74	1.00693	0.223647	0.0242579	86	response regulator
VC1087		1.03218	0.17135	0.0203356	71	0.971394	0.161817	0.017057	90	0.972944	0.151826	0.0185486	68	0.972469	0.198562	0.0224827	78	0.753923	0.440899	0.0422305	113	0.848624	0.360018	0.038378	89	response regulator
VC1088		0.984327	0.267489	0.0257391	108	1.02715	0.122136	0.0101429	145	0.932279	0.267993	0.0246707	122	0.968998	0.244685	0.0217983	129	0.967912	0.264178	0.0200273	182	0.95636	0.345326	0.028482	148	sensor histidine kinase
VC1089		1.03427	0.129544	0.016321	63	1.03714	0.132478	0.0155054	73	0.997192	0.192434	0.0205135	89	1.01142	0.112713	0.0121541	86	0.98112	0.229861	0.0224321	105	1.01784	0.223556	0.0220276	104	periplasmic binding protein-related protein
VC1090		ND			3	ND			2	1.02674	0.0530193	0.0159859	11	1.03904	0.0617339	0.020578	9	0.930996	0.389567	0.17422	5	1.02026	0.043541	0.0131281	11	hypothetical protein
VC1091		0.889171	0.323713	0.0425056	58	0.944197	0.250181	0.029083	74	0.941819	0.279244	0.0452993	39	0.945687	0.236957	0.0342017	48	0.629634	0.454564	0.0487344	88	0.905691	0.407351	0.0530326	59	oligopeptide ABC transporter, periplasmic oligopeptide-binding protein
VC1092	oppB	0.914045	0.308465	0.0487727	40	0.92839	0.256872	0.0378736	46	0.924546	0.275751	0.0402223	47	0.93725	0.271865	0.0388378	49	0.567043	0.466979	0.0647583	52	0.954642	0.328856	0.0443429	56	oligopeptide transporter permease
VC1093		0.922756	0.31408	0.055522	32	0.960622	0.123789	0.0175064	50	0.815776	0.380006	0.0760013	26	0.810222	0.337331	0.0554569	37	0.650947	0.454694	0.057286	63	0.958082	0.407455	0.0709289	33	oligopeptide ABC transporter, permease protein
VC1094	oppD	1.00099	0.195836	0.0351731	31	0.971478	0.0971124	0.0146402	44	0.884556	0.334893	0.0621881	30	0.949427	0.252923	0.0421539	36	0.711567	0.44058	0.0573587	59	1.00482	0.365832	0.0646705	32	oligopeptide transporter ATP-binding component
VC1095		0.951818	0.223526	0.0251487	79	0.885138	0.265746	0.0278578	91	0.963892	0.218264	0.0242515	82	0.960642	0.24542	0.0269383	83	0.777871	0.412682	0.0421192	97	1.01258	0.239393	0.0252342	91	oligopeptide ABC transporter, ATP-binding protein
VC1096		1.02771	0.162613	0.030731	28	0.995461	0.226896	0.0436662	27	0.927591	0.251982	0.0438644	33	0.871737	0.327524	0.0618963	28	0.961373	0.367873	0.0683123	29	0.929618	0.300856	0.0501426	36	hypothetical protein
VC1097		0.353326	0.423493	0.0556074	58	0.442397	0.469399	0.0481593	95	0.0929861	0.25931	0.055285	23	0	X	X	28	0.187933	0.399637	0.0484631	71	ND			1	phosphate acetyltransferase
VC1098		0.452054	0.488206	0.067702	52	0.528228	0.455552	0.0526026	75	0.686064	0.519994	0.129998	16	0.16242	0.318749	0.0625119	26	0.384193	0.501285	0.0571267	80	0	X	X	6	acetate kinase
VC1099		0.998123	0.183524	0.0310212	35	1.0014	0.102963	0.0153488	45	0.947656	0.215626	0.0369795	35	0.971381	0.201568	0.0340712	35	0.917006	0.254075	0.0330777	59	1.0413	0.204946	0.0351479	34	hypothetical protein
VC1100		1.0287	0.0825847	0.0220717	14	0.99689	0.0873358	0.0218339	16	1.0074	0.100776	0.0201552	25	0.992201	0.0958437	0.0199848	23	1.04984	0.0932669	0.0194475	23	0.933897	0.290845	0.0506296	33	hypothetical protein
VC1101		1.01284	0.146513	0.0169178	75	1.01648	0.150213	0.0145216	107	1.01291	0.134445	0.0158445	74	1.03592	0.103945	0.0110806	88	1.02866	0.172174	0.0147098	138	1.01275	0.304213	0.0295477	107	hypothetical protein
VC1102		0.972116	0.199787	0.0244079	67	0.988334	0.173005	0.0194646	79	0.958117	0.21888	0.0223394	97	0.943998	0.231616	0.0241476	93	0.970757	0.275526	0.0263906	111	0.955062	0.333313	0.0313554	113	ABC transporter, permease protein, putative
VC1103		1.02531	0.113161	0.013623	69	1.02462	0.162389	0.0180432	81	0.985142	0.190972	0.021486	79	0.968364	0.186844	0.0214325	76	1.02678	0.248044	0.0230303	118	0.993505	0.252159	0.025871	95	ABC transporter, ATP-binding protein
VC1104		0.973436	0.174481	0.0266081	43	1.06078	0.187826	0.0257999	53	0.94059	0.267621	0.0374744	51	0.982434	0.267322	0.0367195	53	0.980567	0.267343	0.0315067	72	0.937905	0.301552	0.0399415	57	GGDEF family protein
VC1105		1.00057	0.178579	0.0289694	38	0.974139	0.172739	0.0237275	53	0.990259	0.155879	0.0197966	63	0.989514	0.158123	0.0193178	67	1.02317	0.216342	0.0248161	76	0.956496	0.305417	0.0321938	91	hypothetical protein
VC1106		0.979814	0.219981	0.034782	40	0.986548	0.14521	0.0199462	53	0.923825	0.30978	0.0585429	28	1.01967	0.13032	0.0226858	33	0.971286	0.223989	0.0277825	65	0.869635	0.332886	0.0526338	40	preprotein translocase SecA subunit-related protein
VC1107	lolA	ND				ND				ND				ND				ND				ND				outer-membrane lipoprotein carrier protein	Essential
VC1108		0.985896	0.204834	0.0226201	82	0.995378	0.168344	0.0161989	108	0.97756	0.190589	0.0202024	91	0.935012	0.24894	0.0256762	96	0.98043	0.279053	0.0243809	136	0.930828	0.349317	0.0334585	110	recombination factor protein RarA
VC1109		ND				ND				ND				ND				ND				ND				hypothetical protein	Essential
VC1110		ND				ND				ND				ND				ND				ND				seryl-tRNA synthetase	Essential
VC1111		0.985829	0.157649	0.0243257	42	1.00575	0.130256	0.0169579	59	0.945852	0.279407	0.0465678	37	0.940869	0.256777	0.0370626	48	0.916154	0.307659	0.035061	77	0.859227	0.393909	0.0536042	54	adenosylmethionine--8-amino-7-oxononanoate transaminase
VC1112		1.02787	0.137219	0.0158447	75	1.04584	0.206631	0.0217809	90	0.981598	0.183157	0.0177898	106	0.954532	0.226761	0.0223435	104	0.975523	0.267355	0.024931	119	0.986724	0.273389	0.0246507	126	biotin synthase
VC1113		1.03482	0.15436	0.0168421	84	1.01235	0.136699	0.0126922	116	0.984972	0.258077	0.0278292	88	0.989201	0.181065	0.0183844	99	0.94391	0.278502	0.0228158	153	0.918018	0.3177	0.0285303	125	8-amino-7-oxononanoate synthase
VC1114		1.00191	0.230742	0.0384571	36	1.0046	0.191472	0.029903	41	0.982809	0.223997	0.0349824	41	0.911383	0.320043	0.0499822	41	1.01022	0.20901	0.0304872	47	0.96319	0.285861	0.0378632	57	biotin synthesis protein BioC
VC1115	bioD	0.928966	0.259768	0.0459209	32	0.996086	0.124887	0.0208145	36	1.0195	0.179315	0.0248665	52	1.0035	0.196096	0.0280137	49	0.893951	0.333628	0.0486646	47	0.943717	0.334098	0.0408166	67	dithiobiotin synthetase
VC1116		ND			4	1.003	0.0750915	0.030656	6	ND				ND			1	0.850412	0.371037	0.165933	5	ND			2	hypothetical protein
VC1117		0.935349	0.282534	0.0452416	39	0.973743	0.222781	0.0328472	46	0.972667	0.168984	0.0232117	53	0.918972	0.263669	0.0380573	48	1.00582	0.295714	0.0361272	67	1.0594	0.230136	0.0299611	59	heat shock protein HtpX
VC1118		0.890133	0.287922	0.0868116	11	1.03196	0.215273	0.0761103	8	1.0037	0.071223	0.0172741	17	0.988283	0.0954826	0.0255188	14	0.969039	0.236393	0.0712753	11	0.972218	0.243293	0.0558153	19	transcriptional regulator, putative
VC1119		1.01948	0.158051	0.0211204	56	1.04082	0.142592	0.0176863	65	1.00724	0.147503	0.0192033	61	0.996556	0.166732	0.021893	58	0.975261	0.246821	0.0274245	81	0.967169	0.262406	0.0297116	79	short chain dehydrogenase
VC1120		1.00362	0.277295	0.0367286	57	0.996958	0.24327	0.0297202	67	0.977022	0.222175	0.0246861	82	0.976633	0.248392	0.0281248	79	0.918655	0.347227	0.0374425	86	0.93621	0.301953	0.0314808	93	hypothetical protein
VC1121		0.99856	0.216868	0.0319754	46	1.03198	0.129776	0.0171893	57	0.908438	0.308879	0.0482388	41	0.978769	0.207418	0.030255	47	0.953284	0.301657	0.0365813	68	0.958664	0.346071	0.0479914	52	hypothetical protein
VC1122		0.984762	0.191187	0.0248904	59	0.992441	0.213479	0.0241718	78	0.955857	0.26941	0.0420748	41	0.975059	0.222443	0.0308473	52	0.993655	0.239134	0.0270766	78	0.925497	0.372752	0.0489448	58	cyclopropane-fatty-acyl-phospholipid synthase
VC1123		1.01837	0.134954	0.0221863	37	1.00457	0.169714	0.0242449	49	0.9891	0.15434	0.0250373	38	0.979286	0.195779	0.029185	45	0.97499	0.216846	0.0275395	62	0.93651	0.33095	0.0458946	52	hypothetical protein
VC1124		0.902856	0.219649	0.0982302	5	1.04361	0.0590807	0.0208882	8	ND				ND			3	0.475561	0.426333	0.142111	9	ND			3	hypothetical protein
VC1125		0.919336	0.325041	0.0677758	23	0.931869	0.330373	0.0688875	23	1.02312	0.0865154	0.0176599	24	0.980344	0.142504	0.030382	22	0.977264	0.222818	0.0421087	28	0.927551	0.300365	0.0548389	30	hypothetical protein
VC1126		ND				ND				ND				ND				ND				ND				adenylosuccinate lyase	Essential
VC1127		ND			4	0.239388	0.413419	0.146166	8	ND			4	0	X	X	5	ND			1	ND				hypothetical protein
VC1128	trmU	ND			3	ND			4	ND				ND				ND			2	ND				tRNA (5-methylaminomethyl-2-thiouridylate)-methyltransferase
VC1129		0.960905	0.232354	0.0184268	160	0.98325	0.179716	0.0134703	179	0.9311	0.191513	0.0147755	171	0.881557	0.289873	0.0223642	171	0.927455	0.335688	0.0234455	214	1.00568	0.272521	0.0196675	194	inosine-guanosine kinase
VC1130		ND			3	0.0890933	0.239493	0.0977727	6	ND			2	ND			2	ND			2	ND				DNA-binding protein H-NS
VC1131		0.941024	0.273779	0.0324916	71	0.96438	0.241862	0.0259303	87	0.947583	0.257954	0.0306135	72	0.962498	0.262567	0.0301186	77	0.924898	0.321134	0.0303443	116	0.952571	0.308766	0.0327292	90	hypothetical protein
VC1132	hisG	0.958048	0.270205	0.0351777	59	1.02072	0.175915	0.0199185	78	0.977624	0.218985	0.0258076	72	0.922494	0.275806	0.0318474	75	0.951413	0.244154	0.0247901	98	0.928802	0.264302	0.0288377	85	ATP phosphoribosyltransferase
VC1133	hisD	1.00407	0.128795	0.0141371	83	1.00456	0.155986	0.0140648	123	0.93819	0.268991	0.0265044	107	0.967962	0.204178	0.0189575	119	0.961677	0.264697	0.0204828	174	0.865056	0.372678	0.0337407	125	histidinol dehydrogenase
VC1134		1.05901	0.134837	0.0144561	87	1.02687	0.132605	0.0130659	103	0.970656	0.226465	0.0228764	99	1.01226	0.171384	0.0168055	105	1.00896	0.195796	0.0168515	140	0.941031	0.308978	0.0263019	140	histidinol-phosphate aminotransferase
VC1135		0.992281	0.25338	0.0288753	77	1.00005	0.18285	0.0190634	92	0.994849	0.119591	0.0143971	69	0.983168	0.192438	0.0231669	69	0.978177	0.21888	0.021463	104	0.906978	0.352918	0.0360195	97	imidazole glycerol-phosphate dehydratase/histidinol phosphatase
VC1136	hisH	0.944412	0.255736	0.0373029	47	0.986398	0.173235	0.0214872	65	0.969029	0.185401	0.0282734	44	0.938093	0.234325	0.0331386	50	0.893299	0.251086	0.0280723	80	0.848112	0.357908	0.0491625	53	imidazole glycerol phosphate synthase subunit HisH
VC1137		1.05437	0.149132	0.025576	34	1.03888	0.165061	0.0248839	44	0.976974	0.205045	0.0362472	32	1.04448	0.157475	0.0262458	36	0.896369	0.292132	0.0426118	47	0.83297	0.349705	0.0574911	37	1-(5-phosphoribosyl)-5-[(5- phosphoribosylamino)methylideneamino] imidazole-4-carboxamide isomerase
VC1138		0.942351	0.257446	0.0364084	50	1.01697	0.109775	0.0150788	53	0.94181	0.23934	0.02924	68	0.960501	0.253814	0.0319775	64	0.960064	0.175831	0.0204399	74	0.87549	0.338946	0.0399451	72	imidazole glycerol phosphate synthase subunit HisF
VC1139		1.02831	0.143275	0.0286549	25	1.01295	0.150292	0.0265682	32	0.977415	0.23514	0.0470279	25	0.9652	0.232549	0.0456065	26	1.01863	0.148997	0.0238586	39	0.910289	0.265706	0.0502137	28	bifunctional phosphoribosyl-AMP cyclohydrolase/phosphoribosyl-ATP pyrophosphatase protein
VC1140		1.00524	0.145498	0.0219346	44	1.02107	0.115277	0.0150078	59	1.03226	0.126652	0.0186738	46	1.0114	0.111934	0.0156739	51	0.967316	0.2549	0.0292391	76	0.983	0.327602	0.0426502	59	pseudouridine synthase family 1 protein
VC1141		0.640026	0.4104	0.0592362	48	0.50146	0.466117	0.0587252	63	0.40092	0.428683	0.0639043	46	0.271072	0.432211	0.0630445	47	0.0436811	0.169644	0.0222753	58	0.113664	0.335838	0.101259	11	isocitrate dehydrogenase
VC1142		ND			4	0.985399	0.0946965	0.0423496	5	ND			4	0.989991	0.0499792	0.0223514	5	1.13271	0.152564	0.0682289	5	0.880213	0.292997	0.0976656	9	cold shock-like protein CspD
VC1143	clpS	1.12156	0.139352	0.0568901	6	1.04932	0.0969799	0.0395919	6	0.838982	0.106905	0.0259282	17	0.780793	0.229011	0.0572527	16	1.02927	0.13614	0.0453801	9	0.858895	0.378837	0.101248	14	ATP-dependent Clp protease adaptor protein ClpS
VC1144	clpA	0.985958	0.153492	0.0165515	86	0.959751	0.170563	0.0162626	110	0.801438	0.356927	0.0460791	61	0.638446	0.432653	0.0517119	70	0.460524	0.444719	0.0400989	130	0.7704	0.420373	0.0525467	64	ATP-dependent Clp protease ATP-binding subunit
VC1145		0.965134	0.256622	0.0259227	98	1.02463	0.181436	0.0160369	128	0.983871	0.231224	0.026181	80	0.994995	0.21692	0.0224935	93	1.00133	0.24172	0.0195419	157	0.921252	0.366421	0.0372044	98	hypothetical protein
VC1146	grxA	0.927042	0.389003	0.147029	7	0.956725	0.297547	0.0858945	12	ND			4	0.77583	0.330489	0.124913	7	1.02572	0.196663	0.0525603	14	0.736221	0.658847	0.249021	7	glutaredoxin 1
VC1147		0.985712	0.188996	0.0213996	78	1.02376	0.135643	0.0137725	97	0.974967	0.258083	0.0275118	89	0.974172	0.201981	0.0206146	96	0.855603	0.358663	0.0314568	134	0.926001	0.29716	0.0285942	109	iron-containing alcohol dehydrogenase
VC1148		0.903342	0.263123	0.0438538	36	0.891594	0.261241	0.0349098	56	0.826048	0.34098	0.0560567	38	0.766087	0.412168	0.0607709	46	0.416826	0.455082	0.0577954	63	0.433424	0.506996	0.0958133	28	DNA-binding transcriptional regulator HexR
VC1149		ND			3	ND			4	ND				ND				ND				ND				glutamate decarboxylase, putative	Essential
VC1150		1.01201	0.165326	0.042687	15	1.01572	0.180964	0.0415161	19	0.923041	0.281245	0.06629	18	0.933217	0.252177	0.0594387	18	0.960133	0.31647	0.052745	36	0.857349	0.350367	0.0803798	19	hypothetical protein
VC1151		0.997969	0.173102	0.027034	41	1.00604	0.147389	0.0187184	62	0.935006	0.257884	0.0388774	45	0.940961	0.213855	0.0299457	51	0.955602	0.280976	0.0316122	83	0.919706	0.384126	0.0572621	45	hypothetical protein
VC1152		1.02041	0.195077	0.0334555	34	1.07181	0.166086	0.0269427	38	0.968956	0.27387	0.0450239	37	1.04067	0.12217	0.0195628	39	0.786528	0.342319	0.0474712	52	0.884955	0.291112	0.0420183	48	hypothetical protein
VC1153		1.00864	0.130065	0.0210993	38	0.981403	0.18861	0.0259075	53	0.805425	0.380087	0.0760175	26	0.952445	0.182318	0.0303864	36	1.00675	0.227231	0.0288583	62	1.00874	0.236247	0.0399331	35	hypothetical protein
VC1154		1.00238	0.100401	0.018644	29	1.01526	0.0701394	0.0115308	37	0.966876	0.235762	0.0453724	27	0.922107	0.270359	0.0470635	33	0.967945	0.279114	0.0394726	50	0.84505	0.443302	0.0692322	41	hypothetical protein
VC1155		0.991235	0.179666	0.0328025	30	0.982432	0.158136	0.0288716	30	0.979549	0.195511	0.0279301	49	0.997684	0.180712	0.0263596	47	1.00181	0.223083	0.0332552	45	1.01279	0.245344	0.034355	51	response regulator
VC1156		1.02233	0.223702	0.0224829	99	1.00809	0.175413	0.0158164	123	1.00374	0.163025	0.0182268	81	1.01691	0.132824	0.0138479	93	0.956505	0.275271	0.023869	136	0.976767	0.275203	0.0253345	119	sensor histidine kinase
VC1157		0.997553	0.17699	0.0258166	47	0.989014	0.151816	0.0197648	59	1.00575	0.109082	0.0154265	50	0.987559	0.193614	0.0265949	53	0.970186	0.268681	0.0284801	89	0.937474	0.314479	0.0399388	62	response regulator
VC1158		1.02143	0.189409	0.0228022	69	1.03025	0.0962267	0.0102	89	0.92253	0.297568	0.0453786	44	0.966083	0.22862	0.0300193	58	0.898139	0.294907	0.028918	105	0.93382	0.334723	0.0381453	77	hypothetical protein
VC1159		ND				ND				ND				ND				ND				ND				phosphoserine aminotransferase	Essential
VC1160		0.994766	0.211364	0.0338454	39	1.01158	0.216101	0.0329551	43	0.96801	0.205825	0.0297083	48	0.959495	0.248815	0.0379439	43	0.812434	0.366844	0.05039	53	0.965558	0.29545	0.0391333	57	hypothetical protein
VC1161		0.991029	0.173549	0.0167776	107	0.980365	0.231197	0.0211938	119	0.93704	0.269563	0.0250283	117	0.921067	0.315161	0.0281889	126	0.826037	0.387337	0.0326196	146	0.905519	0.315186	0.0263572	144	gonadoliberin III-related protein
VC1162		0.928579	0.327351	0.0629986	27	0.979744	0.163021	0.0257759	40	0.954369	0.297955	0.0769316	15	1.01796	0.0800695	0.0174726	21	0.64844	0.467279	0.0641856	53	1.03608	0.248559	0.0507369	24	hypothetical protein
VC1163		1.03092	0.136384	0.0161859	71	1.00155	0.1962	0.0215357	83	0.936832	0.279936	0.0358422	62	0.904777	0.286795	0.0345261	69	1.01605	0.218926	0.021365	106	0.928659	0.346222	0.0416802	69	hypothetical protein
VC1164		1.00409	0.176339	0.0352678	25	0.994959	0.137556	0.0220267	39	0.943371	0.242437	0.0475458	27	0.898383	0.298556	0.0527778	32	1.08462	0.198132	0.0280201	50	0.964924	0.393713	0.0675211	34	hypothetical protein
VC1165		1.02499	0.170444	0.0190562	80	0.982749	0.195664	0.0188277	108	0.972535	0.244187	0.0264858	85	0.989139	0.208409	0.0212706	96	1.01154	0.213268	0.0189244	130	1.00536	0.275676	0.0278474	98	hypothetical protein
VC1166	aspS	ND				ND				ND				ND				ND				ND				aspartyl-tRNA synthetase	Essential
VC1167		1.04274	0.0901866	0.0184093	24	0.982773	0.195427	0.0345469	32	0.928038	0.287275	0.052449	30	0.921114	0.314332	0.0547183	33	1.03626	0.133549	0.0211159	40	1.03515	0.177306	0.0295509	36	thymidine kinase
VC1168		1.01444	0.181061	0.0206338	77	0.997115	0.250383	0.0266909	88	0.953275	0.233129	0.0286961	67	0.932584	0.257455	0.0319333	65	0.892557	0.303392	0.0297501	105	0.919834	0.345837	0.0396702	76	proton/glutamate symporter
VC1169	trpA	1.05174	0.127283	0.0218289	34	1.04221	0.134158	0.0204589	43	0.970459	0.170468	0.025699	45	0.996316	0.181123	0.0273053	44	0.930193	0.293619	0.037594	61	0.910074	0.347503	0.0444932	61	tryptophan synthase subunit alpha
VC1170		0.969795	0.237561	0.0241207	97	1.00829	0.181666	0.0161202	127	0.985309	0.207546	0.0222513	88	0.961366	0.19236	0.0193329	100	0.777523	0.311727	0.026068	149	0.878506	0.381229	0.0339626	127	tryptophan synthase subunit beta
VC1171		0.971476	0.272406	0.038524	50	1.01458	0.254027	0.0345687	54	0.976651	0.151366	0.0165154	84	0.96892	0.174529	0.0200198	77	0.893529	0.274535	0.0340519	65	0.911373	0.339106	0.0349761	95	bifunctional indole-3-glycerol phosphate synthase/phosphoribosylanthranilate isomerase
VC1172	trpD	0.996446	0.171425	0.0209428	67	1.01012	0.153324	0.0157307	95	0.988365	0.214956	0.0282251	60	0.997925	0.144072	0.0169791	72	0.875912	0.332324	0.0298436	128	0.907103	0.345215	0.0385963	80	anthranilate phosphoribosyltransferase
VC1173		0.984828	0.238504	0.0428366	31	1.02363	0.0808815	0.0127885	40	0.792973	0.388586	0.0868906	20	0.941783	0.239035	0.0460022	27	0.903304	0.320912	0.0440807	53	0.865545	0.367585	0.075033	24	anthranilate synthase component II
VC1174		1.01543	0.156531	0.0138355	129	1.01236	0.212623	0.0176573	146	0.984591	0.183328	0.0141021	171	0.983688	0.206049	0.016139	165	0.98134	0.236779	0.0180542	179	0.915041	0.294011	0.0208419	205	anthranilate synthase component I
VC1175		ND			2	ND			1	0.96554	0.0665392	0.0235252	8	0.956472	0.0677862	0.0276736	6	ND			2	0.990848	0.15191	0.0537082	8	hypothetical protein
VC1176		ND			1	ND			3	ND			2	ND			4	0.907532	0.333046	0.135965	6	ND			2	hypothetical protein
VC1177		0.961336	0.157089	0.0314177	25	0.990686	0.186091	0.031455	35	0.980626	0.142437	0.0367771	15	0.910273	0.314079	0.0685377	21	0.870677	0.331717	0.051185	42	1.01225	0.320337	0.0699032	21	hypothetical protein
VC1178		0.978397	0.167482	0.0311006	29	0.973538	0.22514	0.0391918	33	0.932972	0.266665	0.0478944	31	0.907648	0.283319	0.0517267	30	0.77984	0.37642	0.0574036	43	0.845878	0.332523	0.062841	28	hypothetical protein
VC1179		0.688471	0.419256	0.101685	17	0.587048	0.524889	0.131222	16	0.579312	0.433067	0.0883993	24	0.380115	0.4241	0.0831729	26	0.652499	0.452536	0.0943602	23	0.744916	0.496693	0.137758	13	pseudouridine synthase family 1 protein
VC1180		ND			1	ND				ND			3	ND			2	ND			2	ND			2	cysteine/glutathione ABC transporter membrane/ATP-binding component
VC1181		ND				ND				ND				ND				ND				ND				cysteine/glutathione ABC transporter membrane/ATP-binding component	Essential
VC1182		0.884172	0.304864	0.0494554	38	0.942667	0.226463	0.029483	59	0.591224	0.442584	0.073764	37	0.636205	0.454261	0.0677173	45	0.654059	0.497563	0.0546147	86	0.410327	0.46931	0.0856838	30	thioredoxin reductase
VC1183		1.01628	0.100436	0.0169768	35	1.04517	0.142018	0.0207155	47	0.99578	0.156817	0.0281651	31	0.991932	0.109447	0.0175256	39	0.972001	0.219767	0.0281383	61	0.98657	0.148275	0.0250631	35	hypothetical protein
VC1184		0.986176	0.199533	0.0261999	58	1.0076	0.163232	0.017917	83	1.0029	0.163616	0.0216715	57	0.912973	0.289372	0.0338685	73	0.885326	0.319366	0.0320975	103	0.947756	0.391753	0.0449372	76	NifS-related protein
VC1185		1.02592	0.185408	0.0217004	73	1.0522	0.137493	0.0139603	97	1.00417	0.177856	0.0214114	69	0.954179	0.235673	0.0265152	79	1.00792	0.191845	0.0173688	123	0.995664	0.251703	0.0251703	100	GGDEF family protein
VC1186		0.969939	0.227751	0.0464894	24	1.01002	0.0778559	0.01316	35	0.929597	0.208947	0.0479357	19	0.838477	0.312069	0.0637008	24	0.96674	0.235927	0.0344135	47	0.754966	0.434867	0.0887668	24	sanA protein
VC1187		1.03829	0.156699	0.0301568	27	1.02132	0.0982559	0.0168507	34	0.94735	0.288616	0.0545433	28	0.943767	0.26279	0.0487988	29	0.966176	0.259998	0.0367693	50	0.961296	0.27136	0.041382	43	hypothetical protein
VC1188		0.950282	0.277269	0.0302526	84	0.97363	0.198855	0.0180777	121	0.828087	0.301473	0.030769	99	0.786621	0.355387	0.0340399	112	0.957038	0.333301	0.0263498	167	0.640923	0.47646	0.0542977	78	malate dehydrogenase
VC1189		1.03617	0.106891	0.0218191	24	1.05041	0.121872	0.0215442	32	0.990209	0.164678	0.0274463	36	1.02228	0.179637	0.029141	38	0.833976	0.361664	0.0539137	45	0.991599	0.321467	0.0445794	52	hypothetical protein
VC1190	hemH	0.987453	0.233279	0.0364321	41	1.03674	0.2108	0.0286863	54	0.212182	0.339265	0.0466016	54	0.140915	0.310026	0.041429	56	0.64827	0.47803	0.0579697	68	1.05648	0.105991	0.0432705	6	phosphoribosylaminoimidazole-succinocarboxamide synthase
VC1191		1.03072	0.0809676	0.0233733	12	1.00222	0.276345	0.0670234	17	0.868434	0.432741	0.176666	6	0.951573	0.342277	0.114092	9	0.911401	0.353143	0.0810166	19	1.10652	0.148138	0.0523745	8	hypothetical protein
VC1192		ND				ND				ND				ND				ND				ND				hypothetical protein	Essential
VC1193		0.733754	0.330215	0.116749	8	0.780417	0.515046	0.194669	7	1.00964	0.0628243	0.0280959	5	1.00561	0.136912	0.051748	7	0.865427	0.276649	0.0874841	10	0.992539	0.274799	0.0828549	11	hypothetical protein
VC1194		1.01326	0.178954	0.0263854	46	1.03225	0.130126	0.0185895	49	0.998232	0.208198	0.0258238	65	0.973045	0.218783	0.0277854	63	0.919382	0.333203	0.0392684	72	0.969539	0.247537	0.0295863	71	hypothetical protein
VC1195		1.03502	0.169433	0.0242048	49	1.01284	0.133486	0.0166858	64	0.877548	0.38029	0.0672264	32	0.937767	0.188967	0.0291583	42	0.920049	0.282774	0.0333252	73	0.793671	0.367298	0.0519438	50	putative lipoprotein
VC1196		1.0208	0.253436	0.0581422	19	1.05691	0.0858526	0.0162246	28	ND			4	0.957016	0.109988	0.0347814	10	0.984695	0.231244	0.0453508	26	1.03092	0.114811	0.0287026	16	hypothetical protein
VC1197		0.996173	0.114249	0.0228499	25	0.994594	0.0895169	0.0145216	38	0.947246	0.288672	0.061545	23	0.901099	0.310849	0.056753	30	0.88223	0.342386	0.0474804	52	0.811797	0.416331	0.0760112	30	hypothetical protein
VC1198		0.969218	0.251117	0.0194905	167	0.995357	0.188947	0.0129465	214	0.986034	0.221761	0.0186098	147	0.961707	0.228295	0.0180483	163	0.871612	0.283477	0.0182226	255	0.958794	0.268563	0.0194836	194	hypothetical protein
VC1199		0.922962	0.30136	0.0602721	25	1.03522	0.126934	0.022798	31	0.986415	0.23484	0.050068	22	0.955985	0.23519	0.047038	25	0.83167	0.354719	0.0568005	39	0.915944	0.312854	0.0544609	33	hypothetical protein
VC1200		1.00433	0.208721	0.0278915	56	1.02528	0.190224	0.0232396	67	0.988412	0.196153	0.0253233	61	0.888216	0.334454	0.0418067	64	0.92994	0.27895	0.0290826	93	1.00746	0.303919	0.0348619	76	trypsin, putative
VC1201		0.96047	0.294324	0.0588648	25	1.01026	0.194193	0.0333039	34	1.02479	0.291721	0.0753221	15	0.868509	0.352119	0.0768387	21	0.85396	0.373468	0.0576274	42	0.834146	0.461363	0.0922726	25	hypothetical protein
VC1202	hutH	1.00728	0.157636	0.0151685	108	1.01155	0.116545	0.00992098	138	1.02994	0.108304	0.0106715	106	0.973918	0.21815	0.0205219	115	0.948873	0.247054	0.0186756	181	0.893914	0.356592	0.0298197	144	histidine ammonia-lyase
VC1203		1.00187	0.244367	0.0232995	110	1.01679	0.169913	0.0139668	148	0.974981	0.170949	0.0149359	132	0.954152	0.209102	0.017486	144	0.949899	0.281191	0.0205627	192	0.916391	0.35986	0.0277638	171	urocanate hydratase
VC1204		0.957273	0.315498	0.0486825	42	0.99686	0.222191	0.0305203	53	1.0087	0.169907	0.0268647	41	1.00655	0.156651	0.0233522	45	0.944484	0.209104	0.0259362	65	1.03078	0.259173	0.0374085	48	formimidoylglutamase
VC1205		0.995652	0.220312	0.0271186	66	0.988798	0.195646	0.0206229	90	0.947029	0.222139	0.0277674	66	0.943709	0.231286	0.0272574	73	0.86904	0.317658	0.0293675	121	0.984799	0.318937	0.0345936	85	imidazolonepropionase
VC1206		0.991698	0.24113	0.0341009	50	1.02283	0.157543	0.0193922	66	0.978476	0.293176	0.0423164	49	0.930912	0.299761	0.0397043	57	0.903954	0.287663	0.0310194	86	0.963082	0.241071	0.0319307	57	histidine utilization repressor
VC1207		1.0159	0.141905	0.0164962	74	1.01163	0.104014	0.0106716	95	0.992389	0.205548	0.0237347	76	1.01495	0.154461	0.0169543	83	0.893633	0.294193	0.0273151	119	0.849758	0.399659	0.0382804	110	hypothetical protein
VC1208		0.979402	0.179196	0.0633553	8	0.958047	0.124532	0.0470685	7	0.984464	0.187448	0.0541117	12	1.10998	0.0968304	0.0322768	9	0.992403	0.253595	0.0958499	7	0.925482	0.168893	0.0638357	7	dsDNA-mimic protein
VC1209		0.997595	0.16083	0.0254294	40	1.02491	0.0980772	0.0151336	42	0.993218	0.251655	0.0363232	48	0.967136	0.268041	0.0386884	48	0.981114	0.243757	0.0338031	52	0.977252	0.234945	0.0287031	68	elongation factor P
VC1210		1.05548	0.176524	0.0254791	48	1.04551	0.148047	0.0196094	57	0.9843	0.26497	0.0386499	48	0.970648	0.203752	0.0277271	54	0.931119	0.298767	0.0342709	77	0.930764	0.320007	0.0388066	68	hypothetical protein
VC1211		1.00545	0.200699	0.0173377	134	0.986581	0.228443	0.0177306	166	0.99459	0.151011	0.012997	138	0.972913	0.207895	0.0167526	155	0.972339	0.252434	0.0173783	223	0.96995	0.286214	0.0212741	184	hypothetical protein
VC1212		1.02473	0.178414	0.0155289	133	1.02632	0.160277	0.0121158	175	1.00848	0.187202	0.015285	155	0.985005	0.201858	0.0158108	165	0.977428	0.250314	0.016838	226	0.966936	0.283186	0.0209337	188	DNA polymerase II
VC1213		0.98519	0.160002	0.0443766	13	1.03631	0.346773	0.092679	14	0.276019	0.327286	0.077142	18	0	X	X	18	0.0203752	0.0670982	0.0186097	13	ND				response regulator
VC1214	uvrC	1.00105	0.164752	0.017084	93	1.00631	0.155841	0.0144075	117	0.964327	0.239609	0.0218732	122	0.971873	0.207319	0.0182534	130	0.931288	0.289833	0.0231312	162	0.896659	0.340257	0.0287569	142	excinuclease ABC subunit C
VC1215		0	X	X	6	-0.136612	0.302699	0.123576	6	ND				ND				ND			2	ND				CDP-diacylglycerol--glycerol-3-phosphate 3-phosphatidyltransferase	Essential
VC1216		1.02473	0.166251	0.0207814	64	1.03311	0.182407	0.0212044	74	0.960119	0.280627	0.0350784	65	0.984834	0.212423	0.0257601	69	0.945725	0.268665	0.0278593	93	0.923334	0.345516	0.037258	86	GGDEF family protein
VC1217		0.955799	0.292372	0.0451139	42	1.05064	0.140326	0.0190959	54	0.965086	0.163601	0.0220599	55	0.987925	0.158987	0.0203562	61	0.939263	0.291646	0.0339032	74	0.900283	0.329965	0.0394383	71	hypothetical protein
VC1218		ND				ND				ND				ND				ND				ND				hypothetical protein	Essential
VC1219	pheS	ND				ND				ND				ND				ND				ND				phenylalanyl-tRNA synthetase subunit alpha	Essential
VC1220	pheT	ND				ND				ND				ND				ND				ND				phenylalanyl-tRNA synthetase subunit beta	Essential
VC1221		ND				ND				ND				ND				ND				ND				hypothetical protein	Essential
VC1222	ihfA	ND			2	ND			2	ND			3	ND			3	ND			2	ND				integration host factor subunit alpha
VC1223		0.991747	0.0562236	0.0229532	6	0.993283	0.0949241	0.0387526	6	0.998986	0.0936483	0.0353957	7	0.982605	0.118377	0.0394589	9	1.02369	0.0840437	0.0317655	7	1.04097	0.160128	0.050637	10	hypothetical protein
VC1224		1.05698	0.0922026	0.0192256	23	0.993726	0.0668051	0.011457	34	0.977677	0.169722	0.0353895	23	0.990248	0.0991935	0.0190898	27	1.02922	0.221477	0.0330158	45	0.99034	0.279914	0.045408	38	hypothetical protein
VC1225		ND			2	ND			4	ND			2	ND			3	0.998471	0.135589	0.0553538	6	ND			2	hypothetical protein
VC1226		1.00264	0.210098	0.0350163	36	1.02158	0.15154	0.0204337	55	0.989635	0.223481	0.045618	25	0.955814	0.186175	0.0319287	34	0.932186	0.304135	0.0374364	66	0.913829	0.341021	0.0539201	40	thiopurine S-methyltransferase
VC1227		1.12586	0.141763	0.0472543	9	1.08662	0.0530932	0.0167895	10	1.01839	0.0502053	0.0151375	11	1.01026	0.0709269	0.022429	10	0.928339	0.317664	0.0957792	11	1.05508	0.104089	0.0278188	14	hypothetical protein
VC1228	purT	0.971176	0.26724	0.033147	65	1.05054	0.149424	0.0165012	82	0.977488	0.246627	0.0326665	58	0.910327	0.301098	0.0379348	63	0.922437	0.290416	0.0294873	98	0.929444	0.316869	0.0356506	79	phosphoribosylglycinamide formyltransferase 2
VC1229		1.03467	0.179031	0.0263966	46	1.03824	0.074877	0.00921672	66	0.962634	0.310025	0.0502927	39	1.01497	0.102338	0.0146197	49	0.972671	0.194008	0.021168	86	0.91329	0.353999	0.0468883	57	hypothetical protein
VC1230		ND				ND				ND				ND				ND				ND				hypothetical protein	Essential
VC1231		0.984692	0.199067	0.0327264	37	0.981972	0.18007	0.0292112	38	1.01962	0.185922	0.0274127	46	0.990534	0.196679	0.0299932	43	0.924116	0.318867	0.0446503	51	0.973491	0.327306	0.0445407	54	cytidine deaminase
VC1232		0.928014	0.312459	0.0736473	18	0.999649	0.206476	0.0421466	24	0.910936	0.206006	0.0412012	25	0.977823	0.117351	0.0234702	25	0.930547	0.242623	0.04289	32	0.925833	0.340075	0.0654475	27	hypothetical protein
VC1233		0.900971	0.210335	0.0607185	12	1.02045	0.0818475	0.0192916	18	0.933357	0.264013	0.0681678	15	0.94973	0.236848	0.0558257	18	0.875652	0.304759	0.0665038	21	0.860154	0.365349	0.0797258	21	hypothetical protein
VC1234	sbcB	0.942662	0.308312	0.0398029	60	0.981334	0.186664	0.0216993	74	0.94855	0.208623	0.026284	63	0.883869	0.302799	0.0367198	68	0.786812	0.412582	0.0444899	87	0.908625	0.351258	0.0411117	73	exonuclease I
VC1235		1.01098	0.205431	0.0229679	80	1.01667	0.14771	0.0139572	112	0.987344	0.273193	0.0333758	69	0.967174	0.242184	0.0259648	88	0.980783	0.224223	0.0186207	146	0.904249	0.405534	0.0409651	98	sodium/dicarboxylate symporter
VC1236		1.02608	0.203949	0.0307464	44	1.05047	0.152104	0.0198023	59	0.9426	0.29519	0.0435235	47	0.896443	0.334174	0.0454754	54	0.873076	0.351554	0.0405939	75	0.961527	0.314777	0.0420638	56	PilB-related protein
VC1237	cobT	1.00144	0.152898	0.0206168	55	0.988803	0.168728	0.0214285	62	0.915738	0.28097	0.0359745	62	0.905896	0.310003	0.0400212	60	0.85643	0.364729	0.0405254	81	0.884744	0.33958	0.0414863	67	nicotinate-nucleotide--dimethylbenzimidazole phosphoribosyltransferase
VC1238	cobS	1.05932	0.0806915	0.0201729	16	1.02187	0.203084	0.0423459	23	0.933418	0.373812	0.0763041	24	0.923836	0.271192	0.0531852	26	0.888422	0.304903	0.0522905	34	0.8612	0.37889	0.0716034	28	cobalamin synthase
VC1239	cobU	1.03661	0.104804	0.0157997	44	1.03315	0.0886015	0.0117356	57	0.947276	0.207484	0.0332241	40	0.951111	0.269895	0.0397938	46	1.00451	0.283392	0.0336324	71	1.01655	0.280364	0.0374652	56	adenosylcobinamide kinase/adenosylcobinamide-phosphate guanylyltransferase
VC1240		1.03349	0.186122	0.037992	24	1.02205	0.286319	0.0514245	31	0.827699	0.411883	0.0840753	24	0.900834	0.291319	0.0571323	26	0.888452	0.40461	0.0665176	37	0.838958	0.33244	0.0693185	23	alpha-ribazole-5`-phosphate phosphatase CobC, putative
VC1241		ND			3	ND			1	0.993755	0.0348799	0.0116266	9	0.804728	0.36565	0.149276	6	ND			2	1.01341	0.139591	0.0441426	10	hypothetical protein
VC1242		0.898975	0.289872	0.033697	74	0.962891	0.146636	0.0146636	100	0.918981	0.289036	0.0353113	68	0.829447	0.339344	0.0379398	80	0.988204	0.345846	0.0314406	124	0.860356	0.378404	0.0412873	85	succinylglutamate desuccinylase
VC1243		1.09555	0.0921769	0.0348396	7	1.05732	0.0711566	0.0237189	9	0.937922	0.236614	0.0788714	9	1.00324	0.124407	0.041469	9	0.979242	0.0570336	0.0171963	11	1.00752	0.271749	0.0859346	10	hypothetical protein
VC1244		0.943477	0.277678	0.0469362	35	0.992749	0.230157	0.0378376	37	1.02477	0.109902	0.0171639	41	0.971581	0.24541	0.0392971	39	1.01796	0.195298	0.0356565	30	0.914921	0.286905	0.0397865	52	vtamin B12-transporter permease
VC1245		0.982858	0.239202	0.0308808	60	1.0245	0.200202	0.0231174	75	0.98246	0.220317	0.0257862	74	0.952881	0.26423	0.0299181	78	0.91712	0.333447	0.0342109	95	0.903822	0.324062	0.0311828	109	vitamin B12-transporter ATPase
VC1246		ND				ND				ND				ND				ND				ND				hypothetical protein	Essential
VC1247		1.03457	0.0598323	0.0149581	16	1.01653	0.0368876	0.00786446	22	0.930077	0.289502	0.0773727	14	1.03563	0.100281	0.0230061	19	0.920162	0.226323	0.0413206	30	1.10614	0.355463	0.0775684	21	hypothetical protein
VC1248		1.02887	0.102276	0.012989	62	1.039	0.194769	0.0243461	64	0.987201	0.19717	0.021513	85	0.972669	0.204389	0.0237597	74	1.00157	0.244828	0.0249877	100	0.95914	0.281224	0.0270608	110	methyl-accepting chemotaxis protein
VC1249		0.926264	0.352661	0.0881651	16	1.0538	0.143114	0.0337324	18	1.0747	0.0660365	0.0295324	5	1.04093	0.0839294	0.0279765	9	0.946854	0.353204	0.0943976	14	1.0208	0.125023	0.0376958	11	hypothetical protein
VC1250		1.03655	0.196804	0.0323544	37	1.02089	0.152378	0.0227152	45	0.930549	0.249636	0.0489576	26	0.894884	0.311528	0.0550709	32	0.668453	0.420837	0.0583596	52	1.0414	0.332531	0.0607116	30	hypothetical protein
VC1251		ND				ND				ND				ND				ND				ND				hypothetical protein	Essential
VC1252		0.985957	0.258901	0.0381728	46	1.0223	0.194252	0.0257292	57	1.01235	0.109179	0.0144612	57	0.933559	0.301097	0.0402358	56	0.911267	0.322113	0.0362406	79	0.964592	0.305576	0.0362652	72	competence damage protein CinA, putative
VC1253		1.00741	0.082108	0.0219443	14	0.970597	0.130554	0.0337089	15	0.980633	0.102177	0.023441	19	0.940345	0.130817	0.0308338	18	0.94375	0.215603	0.0449563	23	1.00287	0.275836	0.0563048	24	hypothetical protein
VC1254		1.0696	0.0850716	0.0219654	15	1.06655	0.13044	0.0284643	21	0.896968	0.334679	0.10091	11	1.00763	0.15426	0.0412277	14	0.986521	0.154247	0.0336595	21	0.948624	0.220136	0.0588337	14	iron-sulfur cluster-binding protein, putative
VC1255	nrdB	ND				ND				ND				ND				ND				ND				ribonucleotide-diphosphate reductase subunit beta	Essential
VC1256		ND				ND				ND				ND				ND				ND				ribonucleotide-diphosphate reductase subunit alpha	Essential
VC1257		ND				ND				ND				ND				ND				ND				3-demethylubiquinone-9 3-methyltransferase	Essential
VC1258		ND				ND				ND				ND				ND				ND				DNA gyrase, subunit A	Essential
VC1259		0.995246	0.218121	0.0296825	54	1.01367	0.202066	0.0272466	55	0.98669	0.232445	0.0270212	74	0.93343	0.276986	0.0338392	68	0.904399	0.336018	0.0423343	63	0.884059	0.358393	0.0391039	85	hypothetical protein
VC1260		1.0217	0.107638	0.0172359	39	1.04677	0.101602	0.0149804	46	0.99894	0.172464	0.0224529	60	0.967674	0.200767	0.0254974	62	0.982759	0.212774	0.0244069	77	0.962344	0.302841	0.034512	78	AraC/XylS family transcriptional regulator
VC1261		0.994762	0.226059	0.0270192	70	0.995417	0.213707	0.0219259	95	0.963695	0.213995	0.0240763	81	0.941323	0.229671	0.0244831	88	1.00579	0.213094	0.0191364	126	1.00556	0.249869	0.0247407	103	hypothetical protein
VC1262		1.01568	0.0640239	0.0202461	10	1.08188	0.173556	0.0523291	11	1.00196	0.0922629	0.0255891	13	1.00317	0.113198	0.0313954	13	1.01729	0.174202	0.0502878	12	1.02968	0.161612	0.0391966	17	hypothetical protein
VC1263	ribA	0.901219	0.281229	0.0779989	13	0.696537	0.47462	0.118655	16	0.610614	0.436004	0.102767	18	0.420186	0.468405	0.102214	21	0.215837	0.376889	0.091409	17	ND			4	GTP cyclohydrolase II
VC1264		0.993858	0.212207	0.0344245	38	1.01503	0.138191	0.0186336	55	0.965288	0.226511	0.0400418	33	0.959431	0.236043	0.0359963	43	0.978166	0.261352	0.0303815	74	0.912885	0.316685	0.0457096	48	iron-regulated protein A, putative
VC1265		1.0238	0.17948	0.0287398	39	1.05544	0.153259	0.0214606	51	0.933397	0.270169	0.0412004	44	0.975057	0.170643	0.0260229	43	0.88657	0.358267	0.041932	73	0.973507	0.377984	0.0487976	60	hypothetical protein
VC1266		1.02625	0.192875	0.0232194	69	1.00359	0.128117	0.0132142	94	0.94625	0.286011	0.0372354	60	1.012	0.108568	0.0126207	74	1.04199	0.19544	0.0186345	112	0.919122	0.287117	0.0299341	93	hypothetical protein
VC1267		1.01621	0.188398	0.0269141	49	1.01726	0.176719	0.0209727	71	0.913463	0.334933	0.0683678	25	0.930527	0.262292	0.0425493	38	0.930408	0.26716	0.0300579	80	0.969685	0.307741	0.0499221	38	hypothetical protein
VC1268		0.984507	0.257764	0.029186	78	1.02527	0.19089	0.019089	100	0.96363	0.209854	0.0227619	85	0.906532	0.313044	0.0329977	90	0.888814	0.336898	0.0312802	120	0.86111	0.373542	0.0351398	114	hypothetical protein
VC1269		1.03656	0.096702	0.0258447	14	1.05068	0.092285	0.0217518	18	0.996438	0.166875	0.0445993	14	0.869272	0.308094	0.0770234	16	0.962318	0.253328	0.0540097	22	0.877092	0.420479	0.101981	17	hypothetical protein
VC1270		1.02357	0.126546	0.0227283	31	1.02506	0.249402	0.0410014	37	1.0035	0.225563	0.0470331	23	0.98374	0.148288	0.0309201	23	0.966823	0.230022	0.0363697	40	0.934973	0.287671	0.0543647	28	glyoxylase II family protein
VC1271		0.994199	0.230588	0.0414149	31	1.00549	0.16775	0.0296543	32	0.865498	0.320832	0.0558498	33	0.854211	0.359016	0.0644811	31	0.862921	0.386796	0.0663349	34	0.798442	0.361747	0.0639485	32	hypothetical protein
VC1272		0.986429	0.238448	0.0372393	41	1.02301	0.284145	0.0410127	48	1.04944	0.200275	0.0295289	47	0.91155	0.32973	0.0475925	48	0.987896	0.17517	0.0207888	71	0.897137	0.386736	0.0503487	59	hypothetical protein
VC1273		0.991467	0.20206	0.0270014	56	1.02277	0.153731	0.0171877	80	1.00923	0.135421	0.0187795	53	0.988581	0.197437	0.0250745	62	0.980513	0.244606	0.0245839	100	0.923919	0.417321	0.0491818	72	extracellular solute-binding protein
VC1274		0.980317	0.230667	0.0639755	13	1.01718	0.0954907	0.0225074	18	0.949995	0.309403	0.0893168	12	1.04295	0.109266	0.0282124	15	0.951863	0.258448	0.0551014	22	0.986504	0.383338	0.0958345	16	hypothetical protein
VC1275		1.0514	0.0775638	0.0111954	48	1.07193	0.143661	0.0185465	60	0.970213	0.228845	0.0308575	56	0.957727	0.207471	0.0272423	58	0.955655	0.249479	0.0261525	91	0.901293	0.378904	0.0431802	77	hypothetical protein
VC1276		1.00231	0.236023	0.0254511	86	1.02287	0.158974	0.014955	113	0.976564	0.234566	0.0297899	64	0.981295	0.185861	0.0214614	75	0.983483	0.23304	0.0198377	139	0.993296	0.272919	0.0266341	105	sensor histidine kinase
VC1277		1.05474	0.173981	0.0379657	21	1.03681	0.11573	0.0207856	31	0.925239	0.242585	0.0556528	19	0.869841	0.256328	0.0512655	25	1.03128	0.151882	0.0243205	39	0.93404	0.364729	0.0665902	30	LuxR family transcriptional regulator
VC1278		0.996613	0.110239	0.0172164	41	1.03814	0.213786	0.0366641	34	0.942476	0.166625	0.0208282	64	0.924848	0.217161	0.0295519	54	0.972586	0.346598	0.0463161	56	0.980503	0.292726	0.0349874	71	MarR family transcriptional regulator
VC1279		1.00309	0.235317	0.0248045	90	1.04656	0.159596	0.0152169	110	0.952649	0.246746	0.0251834	97	0.931248	0.281638	0.0281638	101	0.904817	0.294955	0.0242451	153	0.948853	0.277285	0.026201	113	BCCT family transporter
VC1280		0.975918	0.241899	0.0250838	93	0.9988	0.166365	0.014821	126	0.976488	0.2577	0.02577	102	0.971482	0.234639	0.0221713	115	0.965268	0.270568	0.0217326	158	0.93026	0.342941	0.0298492	133	hypothetical protein
VC1281		1.01707	0.106577	0.0185526	33	0.998762	0.18969	0.0282773	45	0.928462	0.264123	0.0434215	38	0.97838	0.139943	0.0210971	44	1.01956	0.193348	0.0256096	57	1.00964	0.243133	0.0343842	50	PTS system, cellobiose-specific IIB component
VC1282		1.04217	0.131059	0.0143856	83	1.03924	0.133492	0.0125579	113	0.99505	0.208335	0.0237419	79	0.96065	0.238136	0.0246936	94	0.976041	0.194925	0.0167147	140	0.934522	0.281781	0.0280383	102	PTS system, cellobiose-specific IIC component
VC1283		0.91341	0.225029	0.0750096	9	0.874564	0.403756	0.111982	13	0.969357	0.250139	0.0606677	17	0.949567	0.250064	0.0589406	18	0.786911	0.49123	0.112696	19	0.965742	0.312651	0.0781626	16	PTS system, cellobiose-specific IIA component
VC1284		1.02982	0.157831	0.0205479	59	1.05494	0.149546	0.017503	73	1.01412	0.209275	0.0270173	61	1.02437	0.15483	0.0187759	68	1.02596	0.163253	0.016662	98	0.969278	0.251872	0.0273194	85	6-phospho-beta-glucosidase
VC1285		0.9751	0.282867	0.0452949	39	1.02959	0.108454	0.0151866	51	0.973007	0.223452	0.0362487	39	1.03222	0.0632189	0.00975488	42	0.997563	0.231939	0.0281268	68	0.951033	0.24568	0.0331275	55	hypothetical protein
VC1286		0.990381	0.217661	0.0265915	67	1.04204	0.183868	0.0206868	79	0.917456	0.256702	0.0304649	72	0.850796	0.291043	0.0333849	76	0.845096	0.369822	0.0387678	92	0.793917	0.399827	0.0455646	77	LacI family transcription regulator
VC1287		1.01526	0.201909	0.016541	151	1.02003	0.166242	0.0119355	195	0.997356	0.138275	0.0111789	157	0.944636	0.222223	0.0171961	170	0.360398	0.388755	0.0253596	249	0.533545	0.431562	0.0311453	197	glucosyltransferase MdoH
VC1288	mdoG	1.02239	0.152358	0.0157988	93	1.00204	0.173239	0.0165177	110	0.982266	0.203312	0.0194737	111	0.989514	0.146261	0.0140092	110	0.463678	0.430318	0.0361115	147	0.580777	0.394549	0.0328791	146	glucan biosynthesis protein G
VC1289		1.03919	0.128441	0.0146372	77	1.02691	0.15158	0.0154706	96	0.947301	0.289683	0.0330124	78	0.973247	0.232499	0.0261582	80	0.941021	0.310232	0.0294459	112	0.914345	0.342216	0.0354861	93	methyl-accepting chemotaxis protein
VC1290		0.989142	0.309124	0.0501465	38	1.02338	0.111277	0.0151429	54	0.884601	0.371707	0.0959742	15	0.92932	0.306494	0.0639084	23	0.896794	0.318746	0.042219	57	0.906974	0.347971	0.0710293	24	DNA polymerase III subunit epsilon
VC1291		0.99565	0.194531	0.0253257	59	0.935934	0.228419	0.0246311	86	0.899914	0.335752	0.0634512	29	0.963347	0.10134	0.0152776	44	0.77459	0.459702	0.0487283	91	0.908313	0.342823	0.045408	57	hypothetical protein
VC1292		1.05892	0.125632	0.0444177	8	1.01646	0.0549989	0.0152539	13	1.12861	0.098931	0.032977	9	1.05109	0.0886335	0.026724	11	1.05967	0.112861	0.0273728	17	0.876944	0.286552	0.0765844	14	hypothetical protein
VC1293		0.961263	0.166178	0.0232695	51	0.977658	0.219662	0.029095	57	0.755588	0.325387	0.0375725	76	0.69308	0.371846	0.0432262	75	0.915483	0.336932	0.0367623	84	0.78774	0.387373	0.0527148	54	aromatic amino acid aminotransferase
VC1294		1.05525	0.104528	0.0348428	9	1.0616	0.0894442	0.0269684	11	0.848729	0.374629	0.0967288	15	0.947258	0.299075	0.0863354	12	1.04015	0.0920963	0.0217073	18	0.996165	0.314838	0.0763595	17	hypothetical protein
VC1295		1.0263	0.230921	0.0282114	67	1.01025	0.20216	0.0213096	90	0.980773	0.201478	0.0240812	71	0.994302	0.195041	0.0218062	81	0.910969	0.348241	0.0339849	108	0.995424	0.312309	0.031548	98	hypothetical protein
VC1296		0.994699	0.297858	0.0526543	32	1.0363	0.119619	0.0178318	45	0.872842	0.296519	0.0494198	37	0.846409	0.334501	0.053563	39	0.940217	0.254553	0.0328627	60	0.946524	0.357734	0.0580321	38	phosphomethylpyrimidine kinase
VC1297	asnC	ND				ND				ND				ND				ND				ND				asparaginyl-tRNA synthetase	Essential
VC1298		1.02562	0.184357	0.0225228	67	1.05478	0.172422	0.019158	81	0.957894	0.22497	0.0274845	68	0.938369	0.27419	0.0316608	76	0.96847	0.239031	0.0239031	101	0.969852	0.261257	0.0273872	91	methyl-accepting chemotaxis protein
VC1299		1.00632	0.140254	0.0350636	16	1.02533	0.209411	0.0523527	16	0.958387	0.124412	0.0393426	10	0.985236	0.193104	0.0557444	12	0.88885	0.270475	0.0698365	15	0.957743	0.348347	0.0844866	17	6-pyruvoyl tetrahydrobiopterin synthase, putative
VC1300		0.901088	0.343905	0.047691	52	0.991723	0.250043	0.0317555	62	0.848452	0.338203	0.0447961	58	0.625488	0.435754	0.0567303	59	0.851258	0.376531	0.0408406	86	0.796572	0.373281	0.0550373	46	L-serine dehydratase 1
VC1301		0.972804	0.285229	0.0320908	79	0.988567	0.294147	0.030339	94	0.954036	0.237399	0.0237399	101	0.918956	0.251913	0.0250663	102	0.967722	0.264811	0.0236854	128	0.925242	0.284119	0.0257229	124	serine transporter
VC1302		0.941705	0.275874	0.0588164	22	0.958843	0.297773	0.0562738	28	0.981029	0.218947	0.0516063	18	0.975336	0.253375	0.0581283	19	0.937796	0.33967	0.0653696	27	0.951428	0.202005	0.0430677	22	MutT/nudix family protein
VC1303		0.998446	0.207349	0.0269946	59	0.951408	0.28755	0.0351298	67	0.822851	0.333088	0.0413144	65	0.732819	0.4106	0.0521463	62	0.846897	0.360096	0.0418603	74	0.751943	0.42318	0.0598466	50	para-aminobenzoate synthase component I
VC1304		0.816928	0.36075	0.0413809	76	0.827952	0.338983	0.0342425	98	0.699323	0.334611	0.0415034	66	0.647544	0.416265	0.0474378	77	0.3497	0.426009	0.0428156	101	0.63928	0.460797	0.077889	35	fumarate hydratase, class I, putative
VC1305		1.06823	0.0386341	0.0172777	5	1.09497	0.21493	0.0961196	5	0.995172	0.141754	0.0578706	6	0.847893	0.380463	0.155323	6	0.949258	0.228835	0.0723639	10	1.14135	0.203853	0.0911656	5	hypothetical protein
VC1306		1.01003	0.170757	0.018857	82	1.00582	0.15793	0.0155613	103	1.00371	0.177339	0.0177339	100	1.00255	0.16503	0.0166705	98	0.942549	0.294703	0.0254585	139	0.954078	0.302252	0.0261106	138	hypothetical protein
VC1307		1.04662	0.102094	0.0144383	50	1.03305	0.11815	0.0140219	71	0.966852	0.242474	0.0318384	60	0.910316	0.304114	0.036611	70	0.97292	0.269577	0.0266921	105	0.915313	0.34439	0.0400346	75
VC1308		0.983824	0.249804	0.0239269	109	1.01441	0.210135	0.0184301	130	0.954289	0.22578	0.0217256	110	0.93354	0.232913	0.0215328	118	0.949861	0.272421	0.0215367	165	0.847122	0.367853	0.033721	121	transcriptional regulator TyrR
VC1309		1.07217	0.059808	0.0140969	18	1.16429	0.268477	0.0585866	21	0.970797	0.220202	0.0408905	29	1.0104	0.119907	0.021892	30	0.985514	0.202765	0.0347739	34	1.00615	0.268755	0.0447925	36	ribosomal-protein-alanine acetyltransferase
VC1310		1.01883	0.0976115	0.0345109	8	0.970886	0.341032	0.120573	8	0.828638	0.344443	0.130187	7	0.923795	0.287588	0.101678	8	0.957404	0.258627	0.0717301	13	0.890542	0.429759	0.119194	13	hypothetical protein
VC1311		0.995381	0.253115	0.0351007	52	0.98746	0.174019	0.0219244	63	1.01759	0.199677	0.0279604	51	1.03651	0.137046	0.0188247	53	0.987022	0.283708	0.0334353	72	0.961968	0.266617	0.0314212	72	hypothetical protein
VC1312	alr	1.01712	0.200235	0.0235979	72	1.04001	0.151658	0.0161668	88	1.03116	0.123304	0.0161907	58	0.982387	0.226535	0.0278846	66	0.959726	0.275015	0.0255345	117	0.946919	0.35968	0.038126	89	alanine racemase
VC1313		1.01886	0.206354	0.0259981	63	1.03117	0.170149	0.0197794	74	0.969111	0.234973	0.0284946	69	0.97229	0.27027	0.0316327	73	0.996065	0.214841	0.0229021	88	0.970801	0.296147	0.0305452	95	methyl-accepting chemotaxis protein
VC1314		0.998995	0.218336	0.0275077	63	1.01791	0.227804	0.0268469	72	0.993882	0.174578	0.0207186	71	0.975213	0.214316	0.0254347	71	0.948871	0.341548	0.0381862	81	0.975158	0.29309	0.0308944	91	transporter, putative
VC1315		1.02429	0.140833	0.0176041	64	1.0293	0.176866	0.0197742	80	1.00495	0.177977	0.0217434	67	0.974696	0.192649	0.0222452	75	0.959343	0.25988	0.0257319	106	0.900566	0.348501	0.0367352	90	sensor histidine kinase
VC1316		0.961246	0.257148	0.0524901	24	1.00168	0.127836	0.0229601	31	0.978979	0.20374	0.0588147	12	0.999381	0.16078	0.0389949	17	0.966979	0.189985	0.0359038	28	0.915665	0.345346	0.0792278	19	chemotaxis protein CheY, putative
VC1317		1.01961	0.219177	0.0260116	71	1.03309	0.16688	0.0171216	95	0.990903	0.246743	0.0301445	68	0.992146	0.216126	0.0252956	73	0.970628	0.221014	0.0210728	115	0.948854	0.249786	0.0263298	90	hypothetical protein
VC1318		1.02431	0.131796	0.0182768	52	1.01739	0.12911	0.0168087	59	1.03086	0.0839925	0.011224	56	1.02923	0.0816706	0.0110125	55	1.0145	0.162365	0.0187483	75	0.957621	0.220025	0.0261122	72	outer membrane protein OmpV
VC1319		0.985907	0.188365	0.024523	59	1.03169	0.218517	0.0249024	77	0.998581	0.185582	0.0223414	69	1.00248	0.169065	0.0193931	76	0.944594	0.278287	0.028857	95	0.919824	0.35657	0.0386755	85	sensor histidine kinase
VC1320		1.02645	0.2714	0.053226	26	1.05713	0.136928	0.0242057	32	0.945118	0.261966	0.0654914	16	0.981925	0.27014	0.0675349	16	0.886595	0.350153	0.0568023	38	0.977221	0.329836	0.0687756	23	DNA-binding response regulator
VC1321		1.03441	0.180365	0.0137928	173	1.02539	0.170412	0.0115683	218	0.988113	0.211061	0.0164311	169	1.00773	0.13184	0.00961539	191	0.579148	0.422264	0.0263915	270	0.74735	0.383004	0.0247228	246	hypothetical protein
VC1322		0.948238	0.280397	0.0845427	11	0.99114	0.122777	0.0340522	13	0.968034	0.0965983	0.0341527	8	0.914422	0.174928	0.0553172	10	0.827983	0.393443	0.109121	13	0.800338	0.419415	0.139805	9	hypothetical protein
VC1323		1.02458	0.251545	0.0548916	21	1.01902	0.150196	0.0320218	22	0.99962	0.189611	0.0413766	21	1.00061	0.112672	0.0265572	18	0.821084	0.434021	0.0835273	27	0.934298	0.343101	0.0686201	25	hypothetical protein
VC1324		ND			4	1.17741	0.116324	0.0520215	5	1.05441	0.0798982	0.0326183	6	1.02288	0.0287303	0.0117291	6	0.894561	0.319242	0.100953	10	0.989908	0.241521	0.0763755	10	hypothetical protein
VC1325		1.00729	0.28341	0.0442612	41	1.05302	0.199172	0.0276202	52	0.87079	0.35147	0.0611831	33	0.908145	0.302994	0.0491521	38	0.926528	0.305422	0.0394298	60	0.857204	0.460569	0.0747142	38	galactoside ABC transporter, periplasmic D-galactose/D-glucose-binding protein
VC1326		ND			2	ND			1	ND			2	ND			2	ND			2	ND			2	hypothetical protein
VC1327		1.03419	0.16136	0.0211876	58	1.04157	0.288383	0.0354975	66	1.0005	0.129192	0.0174203	55	0.995984	0.107767	0.0145314	55	0.935886	0.279062	0.0322233	75	0.993852	0.23132	0.0257022	81	galactose/methyl galaxtoside transporter ATP-binding protein
VC1328	mglC	1.00974	0.210813	0.0267733	62	1.00081	0.285267	0.032095	79	0.991616	0.188932	0.0218159	76	0.910469	0.299488	0.0345819	76	0.964658	0.282906	0.0280119	105	0.917794	0.312152	0.0340585	84	beta-methylgalactoside transporter inner membrane component
VC1329		1.04701	0.132505	0.0124651	113	1.02572	0.133259	0.011555	133	1.03623	0.169077	0.0167411	102	0.98536	0.254345	0.0247042	107	0.949107	0.293197	0.0235501	161	0.995915	0.247278	0.0198618	158	opacity protein-related protein
VC1330		1.02374	0.188218	0.0163206	135	1.03425	0.121685	0.00901989	182	0.99268	0.205581	0.0180306	134	0.989268	0.172091	0.0140046	153	0.951427	0.239372	0.0161019	231	0.993796	0.294981	0.0215137	193	hypothetical protein
VC1331		1.05969	0.109766	0.0330957	11	0.896748	0.249016	0.0665522	14	0.993116	0.0413284	0.0184826	5	0.983636	0.0802218	0.030321	7	0.758057	0.504497	0.122359	17	0.83672	0.378475	0.101152	14	hypothetical protein
VC1332		0.976434	0.233247	0.0245864	90	1.02325	0.14014	0.0127929	120	1.00639	0.205815	0.0211162	97	0.980381	0.212944	0.0204905	110	0.922787	0.308403	0.0250975	159	0.951562	0.335045	0.0298482	128	hypothetical protein
VC1333		1.01091	0.163196	0.0297954	30	1.04856	0.0836552	0.0127573	43	1.01534	0.154272	0.0257119	36	0.994307	0.168442	0.0269723	39	0.997246	0.22008	0.0279502	62	0.8775	0.367666	0.0548084	45	hypothetical protein
VC1334		1.03542	0.215372	0.0386819	31	1.06855	0.112187	0.0171083	43	0.948249	0.270487	0.0590252	21	1.0185	0.098048	0.0176099	31	0.856073	0.404122	0.0544918	55	0.943847	0.33933	0.0653041	27	hypothetical protein
VC1335		0.931831	0.282807	0.043638	42	1.00764	0.205384	0.0282116	53	0.969054	0.20137	0.0331051	37	0.899442	0.282505	0.0464435	37	0.901878	0.343813	0.0451448	58	0.914855	0.349716	0.0510113	47	GntR family transcriptional regulator
VC1336	prpB	1.00782	0.22174	0.0298994	55	1.05367	0.185683	0.0226847	67	0.98314	0.220311	0.0271184	66	0.98256	0.225248	0.0273153	69	0.810193	0.403949	0.0443392	83	0.90699	0.293682	0.0304534	94	2-methylisocitrate lyase
VC1337		1.03817	0.15772	0.0171072	85	1.03652	0.122873	0.0115589	113	1.02397	0.143806	0.0149119	94	1.01411	0.152838	0.015439	99	0.84533	0.37234	0.030004	161	0.90619	0.360515	0.033473	118	methylcitrate synthase
VC1338		1.01038	0.212363	0.0183454	135	1.04378	0.114531	0.00856044	179	1.01359	0.173853	0.0145383	147	0.975765	0.213217	0.0168563	163	0.68191	0.453631	0.0305145	233	0.841849	0.353459	0.0257786	192	aconitate hydratase
VC1339		1.03584	0.215756	0.0263588	67	1.02475	0.226131	0.0241056	88	0.974825	0.239132	0.0287881	70	0.913617	0.300244	0.0320062	88	0.610722	0.478568	0.0469275	105	0.818128	0.396113	0.0408559	95	hypothetical protein
VC1340		1.02806	0.156715	0.0163387	92	1.05001	0.204441	0.018741	119	1.00163	0.220011	0.0249114	78	0.983253	0.21335	0.0227432	88	0.969038	0.256614	0.0217657	144	0.906735	0.327544	0.0304117	116	prpE protein
VC1341		1.00345	0.255887	0.104465	6	1.07463	0.0478079	0.015936	9	1.03477	0.0899972	0.0299991	9	0.96151	0.107368	0.0323725	11	0.961391	0.156312	0.0417762	14	1.07283	0.128648	0.0356807	13	acetyltransferase, putative
VC1342		1.02807	0.166189	0.0182416	83	1.02123	0.189322	0.0182175	108	0.997984	0.192531	0.0219409	79	0.976486	0.208541	0.021861	91	0.975341	0.23577	0.0205212	134	0.949245	0.284668	0.0293612	95	MutT/nudix family protein
VC1343		1.0162	0.203881	0.024908	67	1.03955	0.114277	0.0129393	78	0.983697	0.23229	0.0305012	58	0.979403	0.247351	0.0304468	66	0.943682	0.295607	0.030653	94	0.973815	0.281197	0.0290033	95	M20A family peptidase
VC1344		1.05665	0.126933	0.0158666	64	1.06636	0.166242	0.0179263	86	1.03359	0.165973	0.021427	61	0.960319	0.233449	0.0277053	71	0.929171	0.257703	0.024571	112	0.901581	0.388023	0.0425911	83	4-hydroxyphenylpyruvate dioxygenase
VC1345		1.03887	0.220879	0.0300578	54	1.06832	0.128137	0.0158934	65	0.964813	0.212145	0.0244963	76	0.893289	0.280249	0.0311388	82	0.942748	0.302719	0.0317336	91	0.848611	0.32202	0.0339439	91	oxidoreductase, putative
VC1346		0.995509	0.22606	0.0280393	65	1.01437	0.147824	0.0157581	88	0.974673	0.23194	0.0287686	66	0.907679	0.29208	0.0341854	73	0.865369	0.3063	0.0298918	109	0.745687	0.381297	0.0423663	81	hypothetical protein
VC1347		0.953472	0.305235	0.0610469	25	0.985479	0.383003	0.0666723	33	0.872782	0.321236	0.0629995	26	0.756859	0.390151	0.0712315	30	0.69321	0.439783	0.0662997	44	0.585537	0.439276	0.0802005	30	glutathione S-transferase, putative
VC1348		0.980654	0.262174	0.0327718	64	1.00823	0.271798	0.0298337	83	0.989698	0.223159	0.0318799	50	0.965609	0.235704	0.030686	59	0.952419	0.273739	0.028234	96	0.967664	0.344377	0.0440929	61	response regulator
VC1349		1.00666	0.206063	0.0130326	252	1.02868	0.216629	0.0122839	313	1.00494	0.201883	0.0127938	255	0.990298	0.198417	0.0120087	278	0.943125	0.254643	0.0134396	380	0.974783	0.29041	0.0160597	336	sensory box sensor histidine kinase/response regulator
VC1350		1.02431	0.157366	0.0265998	35	1.024	0.114361	0.0168616	46	0.923755	0.312605	0.0528399	36	0.945469	0.203028	0.0333777	37	0.973036	0.253551	0.0316938	64	0.961905	0.351345	0.0535797	43	antioxidant, putative
VC1351		ND				ND				ND				ND				ND				ND				hypothetical protein	Essential
VC1352		ND				ND				ND				ND				ND				ND				hypothetical protein	Essential
VC1353		1.00922	0.226333	0.0200052	128	1.04911	0.167948	0.0133191	159	0.991901	0.214601	0.0179458	146	0.957509	0.255869	0.0213224	146	0.980925	0.197561	0.0141841	202	0.943507	0.316009	0.0232335	187	GGDEF family protein
VC1354		1.01647	0.259238	0.0359498	52	1.00838	0.214447	0.0250992	73	0.932918	0.258004	0.0368577	50	0.923253	0.288867	0.0389508	55	0.904648	0.263516	0.0282518	88	0.985336	0.402713	0.0538147	56	hypothetical protein
VC1355		1.02755	0.0282646	0.010683	7	1.02735	0.0921964	0.0307321	9	0.846827	0.286012	0.101121	8	0.866572	0.321296	0.0968744	11	0.893387	0.143975	0.04341	11	1.15409	0.315902	0.128966	6	acylphosphatase
VC1356		ND				ND				ND				ND				ND				ND				sulfite reductase, gamma subunit-related protein	Essential
VC1357		ND				ND				ND			3	ND			3	ND				ND			1	hypothetical protein
VC1358		1.07149	0.268888	0.0745761	13	1.04942	0.196446	0.0463029	18	0.940094	0.29345	0.0733625	16	1.00892	0.26319	0.0638331	17	0.783941	0.365731	0.0762602	23	0.950071	0.370192	0.0955831	15	hypothetical protein
VC1359		1.05447	0.151298	0.0252164	36	1.04605	0.174469	0.0263023	44	0.938998	0.28503	0.0403093	50	0.952135	0.215056	0.0320586	45	0.891072	0.267801	0.0348647	59	0.843153	0.387869	0.0543125	51	amino acid ABC transporter, ATP-binding protein
VC1360		1.00447	0.236724	0.028707	68	1.03384	0.231294	0.0265312	76	0.961787	0.252896	0.0286349	79	0.957732	0.224333	0.0252394	80	0.886508	0.341796	0.0335159	105	0.897207	0.306352	0.0296162	109	amino acid ABC transporter, permease protein
VC1361		0.992026	0.244897	0.0301448	66	1.02764	0.136528	0.0140818	94	1.00176	0.171358	0.0196561	77	0.96088	0.187947	0.0202669	86	0.909169	0.308129	0.0283656	122	0.914342	0.318725	0.0305283	110	amino acid ABC transporter, permease protein
VC1362		0.972955	0.245745	0.0276485	79	1.02442	0.226416	0.0219915	106	0.967174	0.266964	0.0402463	45	1.01751	0.122913	0.0158681	60	0.874164	0.281029	0.0269177	111	0.85603	0.363459	0.0428341	72	amino acid ABC transporter, periplasmic amino acid-binding protein
VC1363		1.05672	0.0728889	0.0219768	11	1.02408	0.180654	0.0544693	11	0.989881	0.261592	0.0545457	23	0.87587	0.335134	0.0731322	21	0.826264	0.336498	0.0841246	16	0.978249	0.264537	0.0539985	24	siroheme synthase component enzyme
VC1364		0.998788	0.275171	0.0465124	35	1.00026	0.218522	0.0325754	45	0.998873	0.160122	0.0314025	26	1.02501	0.0833889	0.0143011	34	0.951037	0.276901	0.0387739	51	0.997759	0.311205	0.048602	41	hypothetical protein
VC1365		0.967824	0.295764	0.0591529	25	0.953655	0.236846	0.0384215	38	0.929134	0.296367	0.0740917	16	0.94063	0.123362	0.0283012	19	0.817087	0.384204	0.0566478	46	0.688426	0.508216	0.140954	13	hypothetical protein
VC1366		0.954739	0.236634	0.0341551	48	1.0104	0.203026	0.0259948	61	0.80992	0.349303	0.0672234	27	0.807042	0.382903	0.0629488	37	0.819706	0.316891	0.0396114	65	0.925424	0.259473	0.0410264	40	queuosine biosynthesis protein QueC
VC1367		1.00078	0.238406	0.0210723	128	1.03583	0.185535	0.0144878	164	1.00309	0.169615	0.0154196	122	1.00363	0.19431	0.0168488	134	0.956972	0.237666	0.0168477	209	1.01114	0.245609	0.0192969	165	GGDEF family protein
VC1368		1.05263	0.0215967	0.00965835	5	1.00072	0.0363539	0.0148414	6	1.09618	0.130037	0.0375383	12	1.01454	0.163084	0.0452314	13	1.08574	0.071921	0.0227434	10	1.01181	0.212804	0.0488207	19	hypothetical protein
VC1369		1.00467	0.216734	0.0371697	34	1.05484	0.160789	0.027575	34	1.02396	0.0882163	0.0131505	45	0.989907	0.201393	0.031843	40	0.917783	0.285016	0.0424877	45	0.99549	0.264971	0.0386499	47	hypothetical protein
VC1370		1.04074	0.174126	0.0234791	55	1.04405	0.147188	0.0175923	70	1.02615	0.110884	0.0155268	52	1.00182	0.104486	0.013378	61	0.980898	0.195579	0.022145	79	0.912566	0.336052	0.0401659	70	GGDEF family protein
VC1371		1.06754	0.137009	0.0228348	36	1.0445	0.121209	0.0169726	51	0.929923	0.26855	0.052667	27	0.951242	0.198352	0.0321769	38	0.932688	0.263447	0.0324281	66	0.959609	0.241363	0.0440666	30	hypothetical protein
VC1372		1.01121	0.181068	0.0386039	22	1.04302	0.0721185	0.013167	30	0.958263	0.313493	0.0904977	12	1.01788	0.0846521	0.0205311	17	0.85937	0.303523	0.0554155	30	0.890781	0.289317	0.0663739	19	GGDEF family protein
VC1373		1.00271	0.209814	0.0164339	164	1.01697	0.231686	0.0161817	206	1.02031	0.184974	0.0155776	146	1.00128	0.190671	0.0154148	155	0.924457	0.279894	0.0177021	262	0.921667	0.327804	0.0240358	190	DnaK-related protein
VC1374		1.03661	0.124126	0.0131573	89	1.04442	0.155652	0.0141502	121	1.03801	0.157877	0.0170243	88	1.02844	0.180384	0.0182216	99	0.946954	0.249249	0.021141	142	0.936978	0.308709	0.0276118	126	DnaK-related protein
VC1375		0.922434	0.350099	0.0825191	18	1.00173	0.437763	0.106173	17	1.02024	0.0891419	0.016275	30	1.01205	0.119553	0.023008	27	0.910754	0.315729	0.0631459	25	0.977484	0.198776	0.0322458	38	hypothetical protein
VC1376		1.0161	0.205501	0.022422	84	1.06479	0.181224	0.017602	106	0.952459	0.250704	0.0276856	83	0.947792	0.227218	0.0246453	86	0.951558	0.240815	0.0212026	133	0.956468	0.32344	0.0340936	91	GGDEF family protein
VC1377		0.992424	0.117139	0.0370427	10	0.98421	0.264285	0.0640986	17	0.774457	0.369616	0.130679	8	0.834071	0.31671	0.10557	9	0.921659	0.331111	0.0675878	24	0.657044	0.635822	0.191708	11	hypothetical protein
VC1378		ND			2	ND			1	ND				ND				ND			2	ND			3	hypothetical protein
VC1379		1.01332	0.27799	0.037148	56	1.02096	0.146413	0.0169063	75	0.971607	0.251833	0.0388587	43	0.995928	0.167415	0.0241643	48	0.902915	0.338701	0.0361056	89	0.989259	0.296785	0.0370982	64	hypothetical protein
VC1380		ND			4	1.07496	0.112784	0.0504384	5	1.02825	0.0769684	0.0256561	9	1.06697	0.0309378	0.0109382	8	1.03803	0.0597259	0.0211163	8	0.941793	0.301187	0.0908113	11	hypothetical protein
VC1381		0.964407	0.314503	0.0721519	19	1.01328	0.0967906	0.0173841	31	0.982773	0.340286	0.1026	11	0.760711	0.442754	0.110688	16	0.726331	0.411426	0.0667421	38	0.756225	0.453953	0.1101	17	hypothetical protein
VC1382		0.979085	0.242075	0.0172911	198	0.976181	0.229889	0.0148703	240	0.973829	0.194924	0.0128251	235	0.950384	0.242228	0.0159374	236	0.82518	0.377355	0.0229651	284	0.934515	0.320103	0.0196268	274	ATP-dependent RNA helicase HrpA
VC1383		ND				ND				ND				ND				ND				ND				hypothetical protein	Essential
VC1384		1.04414	0.107108	0.0259776	17	1.02203	0.0733614	0.0149748	24	0.99921	0.164282	0.0376888	19	0.896799	0.306301	0.0653036	22	0.891309	0.267665	0.0459042	34	0.961552	0.33144	0.0662879	25	hypothetical protein
VC1385		ND				ND				ND			3	ND			3	ND			2	ND			3	hypothetical protein
VC1386		1.03352	0.182035	0.0271362	45	1.00623	0.234668	0.0300462	61	0.97918	0.193225	0.0260545	56	0.908685	0.294445	0.0368057	64	0.916585	0.35901	0.03989	82	0.989355	0.287004	0.0340611	71	putative chaperone
VC1387		ND				ND				ND				ND				ND				ND				hypothetical protein	Essential
VC1388	lplA	1.0344	0.220352	0.0294458	56	1.05471	0.270466	0.0338082	64	0.983116	0.194581	0.0241348	66	1.01595	0.10241	0.0125114	67	0.947082	0.218079	0.023654	85	0.987916	0.268108	0.0313797	73	lipoate-protein ligase A
VC1389		ND				ND				ND				ND				ND				ND				hypothetical protein	Essential
VC1390		1.04319	0.187243	0.0248009	57	1.10245	0.216433	0.0268453	65	1.00123	0.227266	0.0247967	85	0.94212	0.308357	0.0340523	82	1.00565	0.25156	0.0252827	100	0.917844	0.283735	0.0275588	107	LysR family transcriptional regulator
VC1391		1.02923	0.197472	0.0248791	63	1.03751	0.100249	0.0103953	93	1.00727	0.264455	0.0356591	57	0.995435	0.190436	0.0222888	73	0.955947	0.249584	0.0232738	118	0.960337	0.32889	0.0358849	84	multidrug transporter, putative
VC1392		1.04455	0.115613	0.0113917	103	1.0435	0.159614	0.0145707	120	0.973244	0.231651	0.0245549	91	0.974019	0.193	0.0193	101	0.948822	0.226907	0.018589	153	0.947938	0.299424	0.026889	125	deoxyribodipyrimidine photolyase, putative
VC1393		1.07748	0.160185	0.0349552	21	1.04116	0.0891575	0.0165561	29	0.911876	0.299341	0.0902547	11	1.02739	0.0839683	0.0224415	14	0.904646	0.271573	0.0465744	34	0.943567	0.391732	0.085483	21	sugE protein
VC1394		1.05173	0.152691	0.0230191	44	1.07455	0.145134	0.0211699	47	0.961162	0.253207	0.0311676	66	0.977781	0.215896	0.0274189	62	0.855218	0.355478	0.0434286	67	0.985008	0.201261	0.0227883	80	methyl-accepting chemotaxis protein
VC1395		1.04383	0.0874202	0.0225718	15	1.08309	0.263715	0.0605004	19	0.913069	0.302457	0.0693884	19	0.886978	0.306673	0.0669215	21	0.909835	0.314447	0.0574099	30	0.942935	0.234177	0.0478012	24
VC1396		0.921652	0.342569	0.0785908	19	1.05994	0.194208	0.0414052	22	0.97087	0.297344	0.0561926	28	1.03183	0.134656	0.0264081	26	0.933828	0.342955	0.0672591	26	0.906327	0.334268	0.0590908	32	hypothetical protein
VC1397		1.0518	0.180489	0.0157694	132	1.04213	0.189295	0.0144757	171	0.996833	0.202599	0.019317	112	0.98598	0.15681	0.0137005	134	0.951701	0.23723	0.0169884	199	0.998064	0.245791	0.0191931	165	chemotaxis protein CheA
VC1398		1.03972	0.160863	0.0288919	31	1.08426	0.218251	0.035405	38	0.951721	0.266334	0.0450187	35	1.00647	0.0904998	0.0152973	35	0.910194	0.298292	0.0444668	45	0.942886	0.357329	0.0587446	37	chemotaxis protein CheY
VC1399		0.940285	0.314808	0.0469288	45	1.0147	0.197505	0.0259336	58	0.921404	0.315316	0.0445923	51	0.876108	0.347247	0.0468227	55	0.931883	0.320838	0.0358708	80	0.931267	0.300393	0.0412622	53	chemotaxis protein methyltransferase CheR
VC1400		1.08121	0.152368	0.0293232	27	1.09624	0.214436	0.0357393	36	0.928868	0.291319	0.0424932	47	0.899123	0.315324	0.0455131	48	0.98307	0.313346	0.0438772	51	1.0065	0.247763	0.0328171	58	hypothetical protein
VC1401		1.01091	0.208866	0.029538	50	1.05475	0.231324	0.0291441	63	0.987885	0.202522	0.0255154	64	0.962361	0.205356	0.0260803	62	0.944376	0.241878	0.0263911	84	0.925817	0.313432	0.0369383	72	protein-glutamate methylesterase CheB
VC1402		1.0289	0.181036	0.0269873	45	1.04931	0.138974	0.0194602	51	0.966563	0.240415	0.0370969	43	0.905943	0.309401	0.0442001	49	0.964766	0.271016	0.031505	74	1.00865	0.321762	0.0426184	58	purine-binding chemotaxis protein Chew, putative
VC1403		0.96656	0.272791	0.0371221	54	1.02541	0.120684	0.014635	68	1.00701	0.208574	0.0251094	69	1.01994	0.163958	0.0194583	71	0.940399	0.327956	0.0364396	82	0.96807	0.283618	0.0300634	91	methyl-accepting chemotaxis protein
VC1404		1.08513	0.0866589	0.038755	5	1.02973	0.0237634	0.00840162	8	ND				ND			1	1.03823	0.194053	0.0646844	9	ND			4	hypothetical protein
VC1405		1.02824	0.219065	0.0223582	96	1.06663	0.123663	0.0111503	123	0.940481	0.290972	0.0286703	105	0.977414	0.224425	0.0209278	116	0.921923	0.30352	0.0248654	154	0.927988	0.370396	0.0315302	141	methyl-accepting chemotaxis protein
VC1406		1.01686	0.208135	0.0333283	39	0.989254	0.208943	0.0292579	51	0.934365	0.329865	0.0466499	51	0.957312	0.26838	0.0355477	57	0.833043	0.374645	0.0441524	72	0.953241	0.308882	0.0409124	57	methyl-accepting chemotaxis protein
VC1407		0.968011	0.30615	0.0525043	34	0.928631	0.341072	0.052013	43	0.973498	0.209766	0.0327599	41	0.960177	0.208861	0.0304655	47	0.906399	0.321347	0.0433305	55	0.968043	0.295945	0.040273	54	ATP-dependent RNA helicase RhlE
VC1408		0.972677	0.347278	0.0796711	19	0.927328	0.318372	0.0663851	23	0.818158	0.326912	0.0653824	25	0.800591	0.428141	0.087394	24	0.695484	0.466448	0.0881503	28	0.70033	0.453269	0.106837	18	TetR family transcriptional regulator
VC1409		1.03401	0.188487	0.0226911	69	1.08314	0.177324	0.0193477	84	1.02367	0.159981	0.0182315	78	1.00895	0.164374	0.0180424	84	0.962913	0.235038	0.0219174	115	0.984107	0.262603	0.0266633	97	multidrug resistance protein, putative
VC1410		0.966056	0.244702	0.0275311	79	0.993677	0.162296	0.0165643	96	0.969081	0.229868	0.0258622	80	0.9238	0.234268	0.026192	80	0.920548	0.306746	0.0284807	121	0.878984	0.345649	0.034739	100	multidrug resistance protein VceA
VC1411		0.969026	0.233895	0.0283639	68	1.02416	0.175069	0.0185572	89	0.995785	0.21233	0.0217846	96	0.960279	0.234634	0.0243305	95	0.909282	0.318557	0.0295772	120	0.963276	0.321678	0.0316959	104	multidrug resistance protein VceB
VC1412		1.05166	0.0377618	0.0133508	8	0.996198	0.101658	0.0359416	8	1.03595	0.0765708	0.0197705	15	1.01936	0.180266	0.0465446	15	0.771767	0.408058	0.10536	15	1.04727	0.117255	0.026219	20	hypothetical protein
VC1413		1.01709	0.224345	0.0282648	63	1.04586	0.201197	0.0237113	72	1.02799	0.127846	0.0145694	77	0.9927	0.153879	0.0175361	77	0.898355	0.3342	0.0339329	98	0.980481	0.279299	0.0268756	108	methyl-accepting chemotaxis protein
VC1414		0.977871	0.262522	0.0275198	91	1.02922	0.165056	0.0152594	117	0.948495	0.290912	0.0345249	72	0.986781	0.152449	0.0166336	84	0.945711	0.261387	0.0230138	133	0.950353	0.354178	0.0379719	88	thermostable carboxypeptidase 1
VC1415		1.03039	0.206623	0.027861	55	1.04408	0.141111	0.0165158	73	1.01599	0.14582	0.0183715	64	1.00194	0.173611	0.0210535	68	0.974387	0.250173	0.0258033	95	1.00032	0.291371	0.0308853	90	hcp protein
VC1416		1.02083	0.227925	0.0147432	241	1.02619	0.203556	0.0115057	314	0.986502	0.210649	0.0136258	244	0.985504	0.164963	0.0101145	274	0.948781	0.271292	0.014047	396	0.95861	0.291214	0.01716	296	vgrG protein
VC1417		1.05225	0.120428	0.0154192	61	1.05243	0.260711	0.0323372	65	0.990894	0.23346	0.0317699	54	0.930237	0.266908	0.0359899	55	0.95446	0.300642	0.034041	78	0.862918	0.365652	0.0440193	69	hypothetical protein
VC1418		1.01961	0.195447	0.0118074	277	1.04844	0.19426	0.010267	359	0.979582	0.216338	0.01277	297	0.974595	0.216198	0.012011	333	0.964754	0.242384	0.0113882	474	0.967257	0.279363	0.015286	347	hypothetical protein
VC1419		0.576054	0.527032	0.175677	9	0.720341	0.404439	0.0904353	20	0.133619	0.329134	0.124401	7	0.212327	0.389487	0.129829	9	0.405907	0.517019	0.112823	21	0.661914	0.429338	0.151794	8	hypothetical protein
VC1420		1.01528	0.250663	0.0245795	104	1.03398	0.190446	0.0161535	139	0.969335	0.246684	0.0238478	110	1.01823	0.108103	0.00970796	124	0.967042	0.224747	0.0167053	189	0.940821	0.344199	0.0298459	134	hypothetical protein
VC1421		1.05108	0.119937	0.0218974	30	1.04816	0.150294	0.0247081	37	0.968272	0.274879	0.0501858	30	0.972901	0.204042	0.0360699	32	0.930827	0.337541	0.0487198	48	0.917633	0.288686	0.0416683	48	hypothetical protein
VC1422		0.968689	0.241655	0.0335116	52	1.00885	0.190518	0.0234511	66	0.964865	0.241694	0.0295276	68	0.92385	0.299294	0.0357724	70	0.84621	0.363939	0.0385774	92	0.924455	0.333087	0.0406931	67	sodium/alanine symporter
VC1423		1.04823	0.186054	0.038795	23	1.15219	0.136449	0.0230641	35	0.88813	0.359785	0.0719569	25	1.00114	0.152991	0.027478	31	0.532876	0.388306	0.0538483	52	0.869483	0.36642	0.0628405	34	hypothetical protein
VC1424		1.01327	0.202338	0.0369416	30	1.04754	0.118507	0.0189763	39	0.903187	0.302741	0.0535175	32	0.854538	0.309833	0.0516388	36	0.79487	0.391172	0.0537316	53	0.800746	0.417514	0.061559	46	spermidine/putrescine ABC transporter, periplasmic spermidine/putrescine-binding protein
VC1425		1.0663	0.0760607	0.0158598	23	1.0422	0.113532	0.020728	30	0.871839	0.364649	0.0644614	32	0.817286	0.379604	0.0632673	36	0.841099	0.334807	0.0516619	42	0.927091	0.372955	0.0659297	32	spermidine/putrescine ABC transporter, periplasmic spermidine/putrescine-binding protein
VC1426	potC	0.981404	0.312885	0.0903221	12	1.04249	0.177774	0.0475122	14	0.94948	0.260507	0.0722516	13	0.662078	0.531294	0.160191	11	0.164018	0.262139	0.0727042	13	0.201147	0.386722	0.122292	10	spermidine/putrescine ABC transporter membrane protein
VC1427	potB	0.911849	0.233158	0.0777195	9	0.971037	0.163181	0.0407952	16	0.827162	0.352991	0.0809817	19	0.48465	0.469058	0.107609	19	0.356936	0.458671	0.0917342	25	0.499775	0.400758	0.10019	16	spermidine/putrescine ABC transporter membrane protein
VC1428	potA	0.940128	0.288288	0.0501845	33	0.985168	0.301443	0.0454442	44	0.880673	0.341894	0.0569823	36	0.780841	0.374161	0.0651331	33	0.310217	0.414156	0.0568886	53	0.669618	0.392773	0.0705441	31	putrescine/spermidine ABC transporter ATPase protein
VC1429		0.992063	0.345988	0.0642483	29	1.00914	0.218587	0.0345617	40	0.956276	0.318514	0.0664148	23	1.03772	0.0830315	0.0156915	28	0.949611	0.320437	0.0477679	45	0.810358	0.386584	0.0653446	35	hypothetical protein
VC1430		1.05639	0.164189	0.0322001	26	1.05981	0.196725	0.036531	29	0.968598	0.268235	0.0440976	37	0.946056	0.292689	0.0517406	32	0.964861	0.267504	0.0458766	34	0.870582	0.328678	0.0513309	41	bax protein, putative
VC1431		0.952727	0.299458	0.0773197	15	1.04952	0.194668	0.048667	16	0.936017	0.365703	0.0914257	16	1.05786	0.0837269	0.0209317	16	0.926918	0.191135	0.0407501	22	0.883317	0.337075	0.0842688	16	hypothetical protein
VC1432		0.955542	0.230013	0.0368315	39	1.04262	0.125723	0.0179604	49	0.975694	0.260907	0.0476348	30	0.951021	0.263323	0.0438872	36	0.928186	0.257639	0.0322049	64	0.982463	0.357177	0.0551136	42	hypothetical protein
VC1433		1.00567	0.214056	0.0338452	40	1.05293	0.203124	0.0276417	54	0.983709	0.165175	0.0264492	40	0.878548	0.305124	0.0459992	44	0.807793	0.355188	0.0433932	67	0.893661	0.434414	0.0614354	50	universal stress protein UspE
VC1434		0.929509	0.29859	0.0527837	32	1.05926	0.159362	0.0237563	45	0.853144	0.330181	0.0583683	32	0.830725	0.309063	0.0522412	35	1.00717	0.302507	0.0366844	68	0.941004	0.369117	0.0642551	33	fumarate/nitrate reduction transcriptional regulator
VC1435		0.952685	0.298366	0.049051	37	0.882936	0.283925	0.042325	45	0.729619	0.364512	0.0562454	42	0.614649	0.426198	0.0682462	39	0.211798	0.352737	0.0484521	53	0.499707	0.477333	0.0871486	30	hypothetical protein
VC1436		1.10451	0.171542	0.0767161	5	1.13215	0.11967	0.0535179	5	ND			1	ND			1	0	X	X	5	ND			2	FixS-related protein
VC1437		0.879518	0.315596	0.0342312	85	0.906394	0.199657	0.019212	108	0.72074	0.365823	0.0396791	87	0.6212	0.408736	0.0435714	90	0.137063	0.29044	0.0261881	128	0.587121	0.439831	0.0549789	64	cation transporter E1-E2 family ATPase
VC1438		0.868386	0.256886	0.077454	11	1.03931	0.0926537	0.0247627	14	0.600334	0.334251	0.118176	8	0.644731	0.433162	0.136978	10	0.155506	0.307194	0.0767985	16	0.697909	0.369416	0.139626	7	hypothetical protein
VC1439		0.931247	0.271132	0.0458296	35	0.956753	0.17647	0.0249566	50	0.715533	0.367895	0.0630935	34	0.508277	0.470329	0.0725733	42	0.100054	0.27843	0.0353607	62	0.516793	0.525198	0.10504	25	cytochrome c oxidase, subunit CcoP
VC1440		ND			4	0.959531	0.0481543	0.0170251	8	ND			4	0.911331	0.0670386	0.0273684	6	0.644299	0.39598	0.11431	12	ND			4	cytochrome c oxidase, subunit CcoQ
VC1441		0.946712	0.207235	0.0574766	13	0.848031	0.344933	0.0752705	21	0.649403	0.410547	0.102637	16	0.521056	0.437483	0.103116	18	0.124793	0.322987	0.063343	26	0.305434	0.419175	0.139725	9	cytochrome c oxidase, subunit CcoO
VC1442		0.912812	0.304596	0.0334337	83	0.901521	0.293039	0.0287349	104	0.789445	0.331393	0.0349319	91	0.683916	0.426866	0.0445039	93	0.152989	0.304488	0.0290318	114	0.531653	0.475062	0.0559866	73	cytochrome c oxidase, subunit CcoN
VC1443		1.03709	0.129788	0.0297755	19	1.08859	0.154224	0.0336544	21	1.04741	0.0975491	0.0207975	22	1.06639	0.0534937	0.0116733	21	0.973255	0.206212	0.0412424	25	1.01417	0.28325	0.0517142	30	hypothetical protein
VC1444		1.02765	0.228034	0.0265084	74	1.07379	0.173599	0.0166278	109	1.11327	0.105496	0.01165	83	1.06706	0.190139	0.019406	97	0.885786	0.336643	0.0283504	143	0.912678	0.311942	0.0301566	108	hypothetical protein
VC1445		1.06055	0.156746	0.0103581	231	1.06701	0.173399	0.0111236	243	1.08264	0.0974422	0.00564467	301	1.10323	0.10098	0.00607826	277	0.963403	0.218332	0.0121672	333	0.965053	0.218979	0.0106978	430	sensor histidine kinase/response regulator
VC1446		1.03443	0.159981	0.0167705	91	1.0309	0.147168	0.0136642	116	1.00036	0.161074	0.0181222	80	0.956285	0.266658	0.0282657	90	0.952488	0.271253	0.0236096	137	0.959398	0.274153	0.0260214	113	toxin secretion transporter, putative
VC1447		1.01044	0.204824	0.0205856	99	1.04396	0.136511	0.0121614	126	1.00758	0.18573	0.018573	102	1.00779	0.160404	0.0152939	111	0.968796	0.262172	0.0201077	177	1.02226	0.237409	0.0204329	136	RTX toxin transporter
VC1448		1.01767	0.199665	0.0177174	127	1.0276	0.22983	0.0185202	154	0.985788	0.199583	0.0171141	138	0.914976	0.300373	0.0251184	146	0.947076	0.263067	0.0200587	179	0.933746	0.294056	0.0226869	172	RTX toxin transporter
VC1449		1.08084	0.0810939	0.0119566	46	1.06373	0.172403	0.0228353	57	1.00485	0.165957	0.0256078	42	0.979438	0.184704	0.0272331	46	0.950401	0.265495	0.0326801	66	0.949549	0.302061	0.0400089	57	hypothetical protein
VC1450		1.02467	0.201441	0.0345469	34	1.05804	0.163267	0.0251927	42	1.03509	0.180624	0.0341347	28	1.01911	0.167947	0.0288026	34	1.01736	0.232724	0.0339463	47	0.925373	0.354687	0.0553927	41	RTX toxin activating protein
VC1451		1.03701	0.199412	0.0078763	648	1.04451	0.189203	0.00662341	822	1.01086	0.172865	0.00644677	749	0.981113	0.201319	0.00725976	797	0.982862	0.222591	0.00692895	1095	0.976209	0.268588	0.00888896	953	RTX toxin RtxA
VC1452		0.978063	0.215028	0.0399297	29	1.02144	0.219817	0.0347561	40	1.09158	0.122195	0.0249428	25	0.996198	0.216181	0.0394691	30	0.971001	0.241499	0.0331724	53	0.972573	0.326218	0.0595591	30	RstC protein
VC1453		1.03562	0.197142	0.0386627	26	1.06279	0.154238	0.0253566	37	1.00532	0.0988738	0.0255291	15	1.02743	0.0861485	0.0183669	22	0.86139	0.345025	0.0538838	41	0.980709	0.26345	0.0574895	21	RstB1 protein
VC1454		1.0507	0.119753	0.00882833	186	1.048	0.18386	0.0117464	246	0.99202	0.208227	0.0151865	194	0.990499	0.158633	0.0110525	211	0.967099	0.224054	0.0131118	302	0.978776	0.288834	0.0181588	260	RstA1 protein
VC1455		0.983697	0.317541	0.0880701	13	1.0382	0.117328	0.0276544	18	0.841675	0.481434	0.160478	9	0.983558	0.236089	0.0711836	11	0.972023	0.315219	0.0723163	19	0.839443	0.39525	0.119172	11	transcriptional repressor RstR
VC1456		0.99513	0.230368	0.0221672	108	1.04465	0.113367	0.00983014	133	0.99919	0.195131	0.0196114	100	0.987295	0.213558	0.0212498	102	0.960899	0.27203	0.0205636	180	0.996486	0.305791	0.0250514	150	cholera enterotoxin, B subunit
VC1457		1.0343	0.181794	0.0103925	309	1.03917	0.17111	0.00868677	389	0.997362	0.215176	0.0117563	344	0.990136	0.204085	0.0109717	357	0.950147	0.228468	0.0102174	521	1.00228	0.239424	0.0116274	433	cholera enterotoxin, A subunit
VC1458		1.03614	0.164266	0.0121429	185	1.05957	0.162738	0.0108013	228	1.02123	0.13999	0.00982537	206	0.987534	0.183152	0.0128232	208	0.968731	0.244959	0.0141901	312	0.952681	0.290274	0.0171944	291	zona occludens toxin
VC1459		1.02867	0.223153	0.0377198	35	1.06689	0.193294	0.0305625	40	0.946107	0.273265	0.0455442	36	0.973619	0.21682	0.0347189	39	0.919008	0.399405	0.0570579	49	0.953753	0.277742	0.0423553	43	accessory cholera enterotoxin
VC1460		1.03962	0.163301	0.0132021	154	1.05092	0.140661	0.00989684	202	1.00947	0.189839	0.014824	169	1.00279	0.157913	0.0115787	188	0.983517	0.237825	0.0148932	264	0.976758	0.293849	0.0201817	217	hypothetical protein
VC1461		1.05535	0.0597102	0.0154171	15	1.04704	0.180135	0.0402793	20	0.900177	0.343986	0.0702158	24	0.994668	0.139516	0.0290911	23	0.898171	0.329713	0.0634533	27	1.08394	0.322764	0.0704328	21	colonization factor
VC1462		1.06947	0.098877	0.0312676	10	0.995283	0.279455	0.0698638	16	0.973936	0.125723	0.0419075	9	1.04111	0.031906	0.00921046	12	1.00451	0.118359	0.0252343	22	1.0983	0.149822	0.0499406	9	RstB2 protein
VC1463		1.05173	0.112258	0.00834406	182	1.05449	0.171708	0.0110607	242	0.991504	0.210685	0.0152847	196	0.994181	0.159281	0.0111246	210	0.983081	0.198909	0.0116006	306	0.975484	0.27789	0.0175402	258	RstA2 protein
VC1464		0.977462	0.31373	0.0870131	13	1.02813	0.107773	0.0261387	17	0.825796	0.478247	0.159416	9	0.970405	0.236716	0.0713725	11	0.988644	0.315792	0.0706133	20	0.82329	0.396675	0.119602	11	transcriptional repressor RstR
VC1465		1.05999	0.149251	0.0272494	30	1.05535	0.0987297	0.016932	34	1.0451	0.0807819	0.0164895	24	1.01478	0.110278	0.0216274	26	0.968357	0.282877	0.0426453	44	1.01001	0.228488	0.0386215	35	hypothetical protein
VC1466		1.09966	0.113152	0.0253016	20	1.11366	0.184945	0.0377518	24	0.931733	0.249631	0.0558191	20	0.927569	0.247383	0.0553166	20	0.916492	0.307955	0.058198	28	0.754579	0.433333	0.0923869	22	hypothetical protein
VC1467		0.953439	0.302492	0.0346982	76	0.99911	0.191222	0.0186613	105	1.02611	0.0758574	0.00919906	68	0.982846	0.203643	0.0235147	75	0.973338	0.235474	0.0204182	138	0.923767	0.332183	0.0316724	110	hypothetical protein
VC1468		1.036	0.119266	0.0214208	31	1.01568	0.213971	0.0338318	40	0.965177	0.206529	0.0397466	27	0.953475	0.205757	0.0358176	33	0.926082	0.22799	0.0347682	43	1.015	0.292673	0.0462756	40	hypothetical protein
VC1469		1.06959	0.157966	0.0131638	145	1.06173	0.1604	0.0117611	187	1.0042	0.193655	0.016027	150	1.00956	0.121636	0.00970759	159	0.964769	0.246309	0.0154853	263	0.961416	0.295534	0.0205908	212	phage replication protein Cri
VC1470		0.9604	0.247928	0.0337387	54	1.00217	0.237035	0.0301035	62	0.982923	0.183494	0.0245204	56	0.935098	0.22565	0.031292	52	0.89034	0.317402	0.0361713	77	0.903092	0.327617	0.0403268	66
VC1471		0.946273	0.198376	0.0749791	7	1.01686	0.089745	0.0259071	12	1.07559	0.0729341	0.0257861	8	0.931971	0.219553	0.0731845	9	1.00679	0.199859	0.0484729	17	0.902837	0.325319	0.0902273	13	hypothetical protein
VC1472		1.10394	0.105562	0.0242176	19	1.10551	0.190047	0.0396275	23	0.922486	0.248494	0.055565	20	0.909886	0.252615	0.0564865	20	0.928271	0.27204	0.0514108	28	0.753369	0.447658	0.095441	22	hypothetical protein
VC1473		0.958531	0.301512	0.0345858	76	0.997629	0.210765	0.0204713	106	1.03302	0.101321	0.0123783	67	0.993088	0.19531	0.0222576	77	0.970896	0.237275	0.0205743	138	0.943922	0.320371	0.0305462	111	hypothetical protein
VC1474		1.03214	0.141031	0.02533	31	1.01796	0.191356	0.030256	40	0.960923	0.205444	0.0395377	27	0.955831	0.202626	0.0358196	32	0.946716	0.221277	0.0337444	43	1.03299	0.246633	0.0367659	45	hypothetical protein
VC1475		1.06974	0.160491	0.0133743	145	1.06174	0.167059	0.0122493	187	1.01279	0.183607	0.0153006	148	1.00789	0.145619	0.0115483	162	0.965256	0.250549	0.0159099	261	0.963929	0.271775	0.0188442	214	phage replication protein Cri
VC1476		0.959375	0.251568	0.0336172	56	0.999394	0.227381	0.0282031	65	0.996903	0.159823	0.0213572	57	0.951505	0.209794	0.0296694	50	0.896847	0.318022	0.0362419	77	0.891156	0.3365	0.0420625	64
VC1477		1.02038	0.159784	0.0183285	76	1.0091	0.137501	0.0138194	99	0.992935	0.155217	0.0160094	96	0.988202	0.139273	0.014365	95	1.00422	0.154473	0.0128728	147	0.989808	0.207312	0.019166	118	transposase OrfAB, subunit A
VC1478		1.02611	0.126549	0.0110566	131	1.02426	0.0992204	0.0077243	165	1.03608	0.0720176	0.00665803	118	1.02279	0.0860096	0.00805554	115	0.999024	0.170654	0.0116656	216	0.998328	0.173814	0.0134906	169	transposase OrfAB, subunit B
VC1479		ND			4	0.869577	0.19606	0.0876808	5	0.702278	0.454681	0.15156	9	0.5084	0.464976	0.175744	7	0.599817	0.47656	0.168489	8	ND			2	hypothetical protein
VC1480		1.09265	0.0921316	0.0348225	7	1.01622	0.15021	0.0500701	9	0.894033	0.269868	0.0899561	9	0.915144	0.231116	0.0770388	9	0.924677	0.29737	0.0824757	13	0.666776	0.508554	0.160819	10	hypothetical protein
VC1481		0.97349	0.260747	0.0752713	12	1.03738	0.117042	0.0275871	18	0.90007	0.272117	0.0754716	13	0.812621	0.3038	0.0716065	18	0.970357	0.193798	0.041318	22	0.891718	0.40087	0.103504	15	hypothetical protein
VC1482		0.922589	0.285864	0.0389011	54	0.966952	0.246028	0.0278572	78	0.856095	0.3917	0.0518819	58	0.687769	0.436442	0.0521648	70	0.60754	0.46989	0.0487253	96	0.769517	0.384155	0.0513349	56	ATP-dependent protease LA-related protein
VC1483		ND				ND				ND				ND				ND				ND				3-hydroxydecanoyl-(acyl carrier protein) dehydratase	Essential
VC1484		ND			3	1.12397	0.210073	0.0939476	5	0.868764	0.360682	0.136325	7	0.924652	0.355249	0.1256	8	0.966109	0.271798	0.0960951	8	0.989917	0.172063	0.0650335	7	ribosome modulation factor
VC1485		ND				ND				ND				ND				ND				ND				hypothetical protein	Essential
VC1486		0.992065	0.225948	0.0371456	37	0.996084	0.180986	0.0248604	53	1.00219	0.303876	0.0513645	36	0.884549	0.406873	0.0593485	47	0.751775	0.410856	0.0501941	68	1.02505	0.283303	0.0432032	43	ABC transporter ATPase component
VC1487		1.00311	0.135611	0.0452038	9	1.00822	0.0966903	0.0291532	11	0.993104	0.0777026	0.0224308	12	0.936733	0.0915451	0.0289491	10	0.961389	0.292006	0.0730014	16	0.911861	0.360202	0.0849004	18	hypothetical protein
VC1488		0.997351	0.238264	0.0286836	69	1.00095	0.292105	0.0309631	89	0.97643	0.236694	0.0298207	63	0.949039	0.249694	0.0298442	70	0.869284	0.277106	0.0275731	106	0.963029	0.327414	0.0370723	78	23S rRNA m(2)G2445 methyltransferase
VC1489		ND				ND				ND			1	ND				ND				0.836091	0.293665	0.131331	5	hypothetical protein
VC1490		1.0804	0.068241	0.0205754	11	1.11478	0.189992	0.0548459	12	0.466861	0.437586	0.11695	14	0.193888	0.386008	0.107059	13	0.854712	0.339667	0.0708254	23	0.921566	0.2671	0.100954	7	hypothetical protein
VC1491		0.980503	0.282023	0.0398841	50	1.01024	0.181884	0.0212879	73	0.222169	0.323687	0.0505515	42	0.147869	0.355745	0.0508207	49	0.86641	0.345335	0.0360036	96	0.69142	0.500507	0.189174	7	dihydroorotate dehydrogenase 2
VC1492		0.988635	0.20878	0.0168789	154	1.01632	0.203932	0.0148339	189	0.973241	0.235223	0.0176804	180	0.976336	0.221348	0.0168288	176	0.829749	0.389094	0.0252212	250	0.979389	0.28547	0.0190313	232	hypothetical protein
VC1493		ND			2	ND			1	ND			4	ND			3	ND			2	ND			3	hypothetical protein
VC1494		1.00781	0.249621	0.0240198	108	1.0218	0.276264	0.02423	130	0.985258	0.191135	0.0168285	131	0.956128	0.250511	0.0222293	128	0.935514	0.271618	0.0208321	177	0.924302	0.323129	0.0247103	177	aminopeptidase N
VC1495		0.97753	0.282817	0.0478047	35	1.02498	0.221396	0.0313101	50	0.867401	0.39191	0.0740641	28	0.922364	0.314687	0.0531919	35	0.961877	0.329136	0.0428498	59	0.805585	0.439784	0.0713424	38	hypothetical protein
VC1496		1.04583	0.105261	0.0132617	63	1.06281	0.102748	0.0108305	90	0.856424	0.31915	0.0415498	61	0.842479	0.326591	0.0390351	70	0.404989	0.406194	0.0382115	117	0.53885	0.409163	0.0567407	52	carboxy-terminal protease
VC1497		1.08478	0.0708878	0.015851	20	1.11084	0.138325	0.030185	21	0.934024	0.260426	0.0510737	26	0.916515	0.247972	0.0477222	27	0.252467	0.363257	0.0589281	38	0.536236	0.480313	0.0960625	25	putative solute/DNA competence effector
VC1498		1.00476	0.234368	0.0370568	40	1.04515	0.218587	0.0312267	49	0.924677	0.33481	0.0621726	29	0.911949	0.319324	0.0555871	33	0.888261	0.32137	0.0429448	56	0.932019	0.270961	0.0413212	43	hypothetical protein
VC1499		1.03285	0.173171	0.0184601	88	1.04861	0.131047	0.0122202	115	0.963191	0.207761	0.0236765	78	0.941261	0.250009	0.0262081	91	0.981677	0.207481	0.0180589	133	0.89579	0.327235	0.0312006	111	ABC transporter, ATP-binding protein
VC1500		1.00193	0.202676	0.0364017	31	1.00362	0.209603	0.0305738	47	0.940387	0.29149	0.0499901	35	0.958847	0.260506	0.0417144	39	0.849147	0.375017	0.0461614	66	0.84296	0.420264	0.070044	36	PqiA family protein
VC1501		1.02789	0.174491	0.0164879	112	1.06846	0.173961	0.0144968	144	0.977588	0.185411	0.0169966	121	0.947375	0.243579	0.0206601	140	0.945014	0.26647	0.0201432	181	0.850994	0.356826	0.0279487	166	hypothetical protein
VC1502	yebU	1.02963	0.214211	0.0254222	71	1.07438	0.176841	0.0190693	86	1.03562	0.168271	0.0208715	66	1.01048	0.15995	0.0191176	70	0.931152	0.279128	0.0276378	102	0.8779	0.371914	0.0392031	91	rRNA (cytosine-C(5)-)-methyltransferase RsmF
VC1503		1.0288	0.182686	0.0308796	35	1.03541	0.242358	0.0393156	38	0.981032	0.248534	0.0392967	40	0.983618	0.23624	0.0393734	36	0.946901	0.313748	0.0439336	51	0.915478	0.358706	0.0534728	45	hypothetical protein
VC1504		0.986038	0.200412	0.0400823	25	1.03182	0.204245	0.0385988	28	0.947737	0.237618	0.0441246	29	0.989169	0.171917	0.0290593	35	1.08147	0.194043	0.0327992	35	0.904351	0.368913	0.0685054	29	hypothetical protein
VC1505		1.10293	0.142834	0.0223068	41	1.10635	0.0986766	0.0135543	53	0.988002	0.135877	0.0202553	45	0.995828	0.161772	0.0235968	47	1.06904	0.120637	0.0144189	70	0.993132	0.33282	0.0426132	61	hypothetical protein
VC1506		1.0036	0.267323	0.0378052	50	1.04897	0.12567	0.0171015	54	0.956717	0.234067	0.0337847	48	0.97838	0.193413	0.0285172	46	0.889263	0.279034	0.0360231	60	0.994821	0.267298	0.034508	60	hypothetical protein
VC1507		0.995313	0.278218	0.0463696	36	0.999875	0.285905	0.0436001	43	0.985474	0.213944	0.0326261	43	0.953943	0.199699	0.0301058	44	0.926956	0.277545	0.0367617	57	0.936033	0.29942	0.0411285	53	phospho-2-dehydro-3-deoxyheptonate aldolase
VC1508		1.06382	0.0629449	0.0148363	18	1.08105	0.126814	0.0264426	23	0.930628	0.35469	0.0813714	19	0.999565	0.137744	0.0300582	21	1.00796	0.105655	0.0192898	30	1.06247	0.20107	0.0449606	20	nucleotide-binding protein
VC1509		0.999453	0.269221	0.0353504	58	1.03085	0.177943	0.021118	71	1.01306	0.168374	0.019573	75	0.979993	0.217454	0.0243121	80	0.836538	0.327219	0.034492	91	0.887934	0.340325	0.034378	99	NAD-dependent deacetylase
VC1510		1.035	0.173019	0.0653951	7	0.998073	0.229114	0.0661396	12	ND			4	0.775586	0.381593	0.155785	6	0.950694	0.255795	0.0639489	16	0.736423	0.397032	0.150064	7	hypothetical protein
VC1511		1.02055	0.180201	0.0206705	76	1.04128	0.114926	0.0111626	106	1.00458	0.120779	0.0154642	63	0.980423	0.203706	0.0230651	78	0.824574	0.345645	0.0300845	137	0.917856	0.348934	0.0357999	95	formate dehydrogenase, cytochrome B556 subunit
VC1512		1.03809	0.178814	0.0302251	35	1.07353	0.156125	0.0223036	49	0.951202	0.2794	0.0501817	31	0.953099	0.138976	0.0234912	35	0.862887	0.328172	0.0430911	58	0.908823	0.358233	0.0540056	44	formate dehydrogenase, iron-sulfur subunit
VC1513		1.04149	0.186633	0.0147087	163	1.06152	0.17514	0.0124467	199	0.993542	0.200631	0.0146326	193	0.964478	0.222354	0.0160054	197	0.896121	0.276355	0.0175133	260	0.994116	0.275072	0.0187597	218
VC1514		1.07539	0.127846	0.0293298	19	1.06715	0.290464	0.0592907	24	0.934536	0.24861	0.0555909	20	0.818599	0.350767	0.0765436	21	0.839639	0.348677	0.0581128	36	0.853812	0.434283	0.0925894	22	hypothetical protein
VC1515		1.02481	0.24778	0.0431329	33	1.06082	0.21382	0.0333931	41	0.929829	0.242253	0.0435099	31	0.927322	0.272677	0.0454461	36	0.888327	0.335009	0.0473774	50	0.977254	0.230408	0.0351369	43	chaperone, formate dehydrogenase-specific, putative
VC1516		0.992617	0.281593	0.0250863	126	1.03337	0.216042	0.0168189	165	0.989123	0.230395	0.0203642	133	0.97112	0.213567	0.01818	141	0.923038	0.244178	0.0177145	201	0.929467	0.338643	0.0265246	166	iron-sulfur cluster-binding protein
VC1517		1.01151	0.229887	0.042689	29	1.06106	0.222232	0.0365348	37	0.939174	0.304041	0.0506734	36	0.956522	0.244029	0.0385843	40	0.910724	0.281124	0.0397569	50	0.986725	0.27931	0.0430985	42	hypothetical protein
VC1518		0.896109	0.31456	0.0741424	18	1.03359	0.138228	0.0271087	26	0.947785	0.309424	0.0691893	20	0.990112	0.139533	0.0304487	21	0.784122	0.469958	0.0794374	35	0.895255	0.407209	0.0731369	31	hypothetical protein
VC1519		1.02093	0.176936	0.0255386	48	1.0325	0.231988	0.0287745	65	1.00421	0.252841	0.0390142	43	0.949564	0.242881	0.0336816	52	0.853086	0.346413	0.0375738	85	0.903594	0.40662	0.0508275	64	formate dehydrogenase accessory protein
VC1520		0.971505	0.287456	0.0356545	65	1.03628	0.159499	0.0168126	90	1.00217	0.172566	0.0246523	50	0.991035	0.170062	0.0212577	64	0.867845	0.331939	0.0323939	109	0.952914	0.356632	0.0426257	70	ABC transporter, ATP-binding protein
VC1521		1.04015	0.195782	0.0174417	126	1.02519	0.230419	0.0188766	149	1.00405	0.163498	0.012503	176	0.997992	0.161374	0.0126012	167	0.914551	0.260229	0.0179575	214	0.997377	0.247514	0.0175019	204	sensor histidine kinase
VC1522		0.984525	0.271652	0.0284769	91	1.03597	0.165687	0.0148195	125	0.977355	0.204179	0.0200214	106	1.00137	0.106339	0.00983104	119	0.886445	0.296939	0.0234021	168	0.954029	0.292158	0.0241792	146	sigma-54 dependent response regulator
VC1523		1.02324	0.165735	0.0210483	62	1.03642	0.190766	0.0214628	79	0.913842	0.321065	0.0417991	60	0.998529	0.189963	0.0239331	63	0.893158	0.268222	0.027519	98	0.936192	0.325376	0.03708	78	hypothetical protein
VC1524		1.04137	0.122394	0.0166557	54	1.02719	0.152496	0.0183583	69	0.951518	0.259275	0.0400069	43	0.926375	0.260935	0.0369018	50	0.905794	0.290679	0.0319062	84	0.82119	0.435279	0.059234	54	ABC transporter, permease protein
VC1525		1.05201	0.184383	0.0303124	37	1.02817	0.1975	0.0263921	56	0.921335	0.281927	0.0483501	34	0.885693	0.285968	0.0431113	44	0.874012	0.347194	0.0412044	71	0.972023	0.361527	0.0538932	45	ABC transporter, ATP-binding protein
VC1526	mobA	1.06786	0.170965	0.0284942	36	1.09563	0.161039	0.0248489	42	0.983356	0.174676	0.0263335	44	0.905679	0.265811	0.0400726	44	0.903231	0.247141	0.0333245	55	0.915157	0.313246	0.0418592	56	molybdopterin-guanine dinucleotide biosynthesis protein A
VC1527		1.02113	0.214224	0.0256047	70	1.07409	0.194679	0.0211159	85	0.983774	0.130811	0.0141057	87	0.953418	0.212024	0.0224745	90	0.87803	0.314857	0.0304384	108	0.963875	0.315503	0.0303593	109	molybdopterin biosynthesis MoeA protein
VC1528		0.910403	0.357164	0.134995	7	0.929168	0.236212	0.0787374	9	1.03609	0.0582765	0.015575	14	1.03224	0.0756827	0.0209906	13	0.999565	0.0876324	0.0277118	10	1.02961	0.136873	0.0331966	17	hypothetical protein
VC1529		0.94493	0.362371	0.12079	9	1.02969	0.05333	0.0147911	13	ND			2	0.963153	0.0800905	0.0326968	6	1.05161	0.138753	0.0370833	14	ND			4	hypothetical protein
VC1530		1.01702	0.128766	0.0525686	6	1.03622	0.062802	0.0222039	8	ND			4	0.93465	0.290846	0.13007	5	0.958449	0.340505	0.107677	10	0.860299	0.393046	0.16046	6	hypothetical protein
VC1531		0.957875	0.313753	0.0905727	12	1.08215	0.108302	0.0289449	14	1.08741	0.202411	0.0522622	15	1.05079	0.0978163	0.0237239	17	0.835176	0.373952	0.0816031	21	0.984612	0.179226	0.0391104	21	hypothetical protein
VC1532		1.05715	0.288959	0.0481598	36	1.04715	0.217383	0.0320514	46	0.890237	0.28679	0.0465235	38	0.876288	0.278121	0.0439747	40	0.81484	0.409628	0.0508081	65	1.00198	0.310429	0.0497084	39	N-acetyl-D-glucosamine kinase
VC1533		1.03572	0.222484	0.0420456	28	1.04642	0.127104	0.0221259	33	1.01221	0.120394	0.0170262	50	0.981667	0.204269	0.0291813	49	0.916061	0.270682	0.0386688	49	0.989591	0.233993	0.0290232	65	hypothetical protein
VC1534		1.06435	0.145893	0.0270916	29	1.01796	0.28802	0.049395	34	0.957017	0.294847	0.0505658	34	1.02487	0.191272	0.0349214	30	0.869521	0.331821	0.0494649	45	1.02213	0.304632	0.0487801	39	hypothetical protein
VC1535		1.07034	0.103568	0.0120395	74	1.03013	0.19437	0.0212075	84	1.00666	0.184574	0.0182756	103	1.02421	0.156543	0.0161461	94	0.943926	0.268692	0.025389	113	0.983491	0.224748	0.0189947	140	methyl-accepting chemotaxis protein
VC1536		1.06884	0.175174	0.0357572	24	1.00573	0.291134	0.0531536	30	0.888148	0.394148	0.0731915	29	0.919696	0.328035	0.0609146	29	0.821153	0.389199	0.0657866	35	0.968789	0.187967	0.0349046	29	hypothetical protein
VC1537		1.06508	0.116753	0.0323814	13	1.05452	0.0764948	0.0171048	20	ND			2	1.01308	0.0456991	0.0186566	6	0.862016	0.321678	0.0701959	21	0.82693	0.525612	0.198663	7	lipoprotein NlpC
VC1538		0.70361	0.495811	0.16527	9	0.955011	0.287009	0.079602	13	1.02147	0.139922	0.0388075	13	0.908997	0.2692	0.0695072	15	0.922347	0.382773	0.0988316	15	0.844132	0.348941	0.0822461	18	hypothetical protein
VC1539		1.05581	0.113317	0.0186292	37	1.0447	0.110986	0.0148311	56	0.946659	0.349542	0.0649083	29	0.840895	0.374023	0.0598916	39	0.922847	0.270328	0.0320821	73	0.925556	0.336111	0.0531437	40	hypothetical protein
VC1540		1.05312	0.139532	0.0217912	41	1.0676	0.153787	0.0203695	57	0.985981	0.264821	0.0353883	57	0.934767	0.297068	0.0374271	63	0.958702	0.248964	0.0281896	78	0.908647	0.33659	0.038866	75	multidrug efflux protein
VC1541		1.06729	0.0872624	0.0133074	43	1.05627	0.12586	0.0171274	54	1.03686	0.20536	0.0363029	32	1.00291	0.19262	0.0300822	41	0.960415	0.274376	0.0325625	71	0.89262	0.352831	0.0475757	55	hypothetical protein
VC1542		1.04135	0.178245	0.0271821	43	1.03743	0.125409	0.0173912	52	0.919203	0.299025	0.0461406	42	0.900156	0.313511	0.0489622	41	0.972605	0.210293	0.0260837	65	0.911837	0.380621	0.0522823	53	DNA ligase
VC1543		1.03256	0.265692	0.0477196	31	1.0655	0.116109	0.0183585	40	0.91382	0.290163	0.0477025	37	0.777088	0.355402	0.0569098	39	0.789519	0.436686	0.0594254	54	0.810739	0.419734	0.0730663	33	hypothetical protein
VC1544		1.01354	0.271579	0.0459052	35	1.07087	0.156725	0.0247804	40	0.944242	0.213653	0.0271339	62	0.797715	0.370996	0.0500251	55	0.858177	0.394207	0.051762	58	0.850142	0.373275	0.0481896	60	tonB2 protein
VC1545		0.850078	0.37431	0.152811	6	0.932225	0.283498	0.0944992	9	ND			3	ND			4	1.02778	0.111742	0.0372474	9	ND			4	TonB system transport protein ExbD2
VC1546		0.953757	0.322163	0.0620003	27	1.07667	0.191213	0.0310188	38	0.960781	0.0892976	0.0223244	16	0.708928	0.35459	0.077378	21	0.847659	0.370749	0.0540793	47	0.830317	0.405408	0.0780209	27	TonB system transport protein ExbB2
VC1547		0.909082	0.340422	0.047208	52	0.97568	0.236912	0.0273563	75	0.936568	0.311062	0.0388828	65	0.791198	0.400407	0.0478577	70	0.867202	0.316662	0.0331952	95	0.773806	0.442348	0.0532524	69	biopolymer transport protein ExbB-related protein
VC1548		0.999128	0.309451	0.0433319	51	1.03191	0.264613	0.0314038	71	0.849783	0.342705	0.0466362	55	0.831044	0.345505	0.045367	58	0.905396	0.29793	0.0314046	93	0.783975	0.453042	0.058981	59	hypothetical protein
VC1549		1.04116	0.163972	0.0157782	108	1.04468	0.144267	0.0119396	146	0.981939	0.191314	0.0203942	88	0.93671	0.200704	0.0192239	112	0.961816	0.239072	0.0185556	173	0.942144	0.368761	0.032983	126	glycerol-3-phosphate ABC transporter, periplasmic glycerol-3-phosphate-binding protein
VC1550		1.00857	0.260537	0.0434228	36	1.03686	0.197964	0.0301892	43	1.01819	0.169905	0.0231211	54	0.923668	0.228877	0.0320491	51	1.00595	0.269781	0.0354239	58	0.93461	0.28457	0.0367378	60	glycerol-3-phosphate ABC transporter, permease protein
VC1551		1.02147	0.20185	0.0341189	35	1.05197	0.0980387	0.0140055	49	0.963546	0.278027	0.0423988	44	0.88539	0.342837	0.050008	47	0.891377	0.349634	0.042091	69	0.860935	0.356875	0.0490205	53	glycerol-3-phosphate ABC transporter, permease protein
VC1552		0.994825	0.277965	0.0358851	60	1.04159	0.178188	0.0203064	77	0.97006	0.233732	0.0296839	63	0.956881	0.228169	0.0278752	67	0.98558	0.211506	0.0215868	97	0.988177	0.335558	0.0361842	86	glycerol-3-phosphate transporter ATP-binding subunit
VC1553		1.06536	0.0764796	0.0109257	49	1.03916	0.19427	0.0257317	57	0.97077	0.258084	0.0330443	62	0.958758	0.22323	0.0293116	58	0.960521	0.269526	0.0305178	78	0.914103	0.336693	0.0383697	78	glycerol-3-phosphate regulon repressor
VC1554		0.980974	0.26586	0.0609926	19	1.06954	0.136815	0.02633	27	1.03002	0.15269	0.0325537	22	0.998732	0.16964	0.0346276	24	0.618186	0.418087	0.063029	44	0.7181	0.449259	0.0748765	36	glycerophosphoryl diester phosphodiesterase, putative
VC1555		1.05014	0.223925	0.0310528	52	1.06235	0.174559	0.0218199	64	1.04088	0.103569	0.0135993	58	0.99734	0.179987	0.0238399	57	0.96964	0.247219	0.0274687	81	1.00446	0.169554	0.0199821	72	hypothetical protein
VC1556		1.03705	0.0940355	0.022807	17	1.05314	0.0856762	0.0174886	24	0.995857	0.232703	0.0465406	25	0.98765	0.231996	0.0463991	25	0.990442	0.20666	0.034932	35	0.949942	0.314008	0.053852	34	hypothetical protein
VC1557		1.05326	0.129625	0.0189077	47	1.08495	0.182109	0.0233167	61	0.977459	0.23665	0.0319099	56	0.925237	0.233335	0.0306384	58	0.829698	0.362243	0.0397613	83	0.917021	0.297228	0.0338723	78	LacI family transcription regulator
VC1558		1.02935	0.225309	0.0251903	80	1.03519	0.193828	0.0197825	96	0.949963	0.299844	0.0358382	71	0.946034	0.254483	0.029785	73	0.933018	0.283894	0.0269461	112	0.879725	0.361067	0.0380598	91	6-phospho-beta-glucosidase
VC1559		ND			2	ND			4	ND			2	ND			3	0.964617	0.0834508	0.0340686	6	ND			2	hypothetical protein
VC1560		1.03559	0.179079	0.0164855	118	1.06608	0.130215	0.0107036	148	0.989804	0.192703	0.0174465	126	0.951002	0.225684	0.0197938	131	0.962552	0.248749	0.0180938	197	0.883156	0.336248	0.028833	139	catalase/peroxidase
VC1561		0.955657	0.259109	0.0409687	40	0.960483	0.296567	0.045226	43	0.998171	0.197218	0.0250467	62	0.939824	0.265283	0.0357708	55	0.92241	0.335371	0.0422527	63	0.975565	0.303129	0.0332727	83	LysR family transcriptional regulator
VC1562		1.04509	0.171461	0.0209473	67	1.05188	0.14394	0.0149258	93	0.999274	0.224105	0.0262295	74	0.971177	0.153952	0.0174316	78	1.00193	0.210437	0.0188978	126	0.851361	0.362016	0.0371421	95	beta-lactamase-related protein
VC1563		1.00998	0.241554	0.0273506	78	1.05003	0.149326	0.0151617	97	1.00639	0.154713	0.0176312	79	0.993742	0.169388	0.0183727	85	0.902346	0.289207	0.0269687	120	0.983641	0.251102	0.0230185	120	hypothetical protein
VC1564		1.04198	0.170388	0.0272839	39	1.0645	0.138304	0.0199624	48	1.0469	0.086493	0.0169627	26	1.04016	0.137187	0.025475	29	0.986423	0.240777	0.0316156	58	0.918578	0.34344	0.051197	45	hypothetical protein
VC1565		0.996009	0.282478	0.0335239	71	1.05758	0.189375	0.0196373	93	0.976506	0.299136	0.0355009	72	0.949168	0.27488	0.0305422	81	0.93538	0.295792	0.0277034	116	0.990325	0.283965	0.0292888	95	outer membrane protein TolC, putative
VC1566		1.051	0.209598	0.0354285	35	1.08479	0.139874	0.0197811	50	1.00525	0.259792	0.0416	40	1.02184	0.194918	0.0290566	45	0.926289	0.301352	0.037669	64	0.901284	0.364596	0.0543508	45	hypothetical protein
VC1567		0.970672	0.257489	0.0407125	40	1.03504	0.179534	0.0242083	55	0.994886	0.288252	0.0416056	49	0.933832	0.286677	0.0409539	49	0.936562	0.283288	0.0324953	78	0.960138	0.263767	0.0346343	58	hypothetical protein
VC1568		1.04342	0.22136	0.0326378	46	1.09086	0.262995	0.0368267	51	0.986676	0.17076	0.021345	64	0.980915	0.184755	0.0234639	62	0.95199	0.300646	0.037007	66	0.902122	0.341683	0.0379648	81	ABC transporter, ATP-binding protein
VC1569		0.938577	0.343826	0.108727	10	0.991776	0.16134	0.0447477	13	1.07715	0.0300817	0.0113698	7	0.920263	0.312206	0.0987281	10	0.982871	0.355153	0.102524	12	0.910576	0.294008	0.0713073	17	hypothetical protein
VC1570		1.073	0.117991	0.0251559	22	0.996333	0.264439	0.0491051	29	0.988064	0.228715	0.0476903	23	0.894351	0.295768	0.0591535	25	0.684988	0.448175	0.0691549	42	0.840052	0.390419	0.0737822	28	quinol oxidase, subunit II
VC1571		1.0484	0.170964	0.0205817	69	1.04401	0.103262	0.0110077	88	0.941617	0.297601	0.0377954	63	0.964514	0.223964	0.0267688	70	0.943856	0.242222	0.0233078	110	0.974165	0.334829	0.0356929	88	quinol oxidase, subunit I
VC1572		1.07337	0.104747	0.0349157	9	1.0204	0.183822	0.0649908	8	1.05473	0.0960765	0.0289682	11	0.995938	0.114451	0.0381503	9	1.06898	0.186281	0.0537746	12	1.01148	0.090316	0.026072	12	hypothetical protein
VC1573	fumC	1.04088	0.14457	0.0188214	59	1.04616	0.211275	0.0236213	80	1.01584	0.193068	0.0239472	66	0.993025	0.179441	0.0211473	72	0.963657	0.221605	0.0217301	107	0.924366	0.326017	0.0336261	94	fumarate hydratase
VC1574		1.07475	0.0918364	0.0191492	23	1.03619	0.118104	0.0212122	31	1.01686	0.0868918	0.0199343	19	0.972418	0.0866138	0.0180602	23	0.991512	0.171736	0.0286226	36	0.965357	0.235282	0.0429564	30	hypothetical protein
VC1575		0.994128	0.16569	0.0252674	43	1.01448	0.170906	0.0237004	52	0.989661	0.190362	0.0405854	22	0.901185	0.332338	0.0606763	30	0.838582	0.322449	0.0412854	61	0.90807	0.334625	0.056562	35	hypothetical protein
VC1576		1.04948	0.0804211	0.0223048	13	0.979284	0.266444	0.066611	16	1.00853	0.0974754	0.0223624	19	1.00815	0.174694	0.0436735	16	0.982865	0.283875	0.0605224	22	0.889946	0.368533	0.0737066	25	hypothetical protein
VC1577		1.01373	0.199548	0.0407325	24	1.04838	0.0723239	0.0112951	41	0.981644	0.303887	0.0784632	16	0.951486	0.269717	0.0539434	25	0.952951	0.268659	0.036226	56	1.01461	0.196862	0.0429589	21	hypothetical protein
VC1578		1.07045	0.0488271	0.0199336	6	1.12287	0.190514	0.0852004	5	0.907855	0.0698152	0.0285019	6	ND			4	1.0123	0.0682714	0.0305319	5	0.952526	0.395749	0.139919	8	hypothetical protein
VC1579		1.00742	0.239967	0.0190908	159	1.03968	0.192432	0.0139974	190	0.997873	0.198147	0.0158644	158	0.992982	0.187164	0.014705	164	0.959915	0.242324	0.0163005	230	0.992438	0.265308	0.0185299	208	enterobactin synthetase component F-related protein
VC1580		1.07181	0.160337	0.0271019	35	1.06439	0.259726	0.0396079	43	0.999632	0.248518	0.0432614	33	1.01372	0.150013	0.0246619	37	0.813215	0.387909	0.0492645	62	0.815321	0.404878	0.0556142	53	LysR family transcriptional regulator
VC1581		1.01312	0.246898	0.0231241	114	1.03603	0.173856	0.0141016	152	0.969236	0.268996	0.0242546	125	0.979204	0.20331	0.0179005	132	0.935665	0.298117	0.021859	195	0.915799	0.338491	0.027546	154	NADH dehydrogenase subunit L
VC1582		1.03311	0.223194	0.0170184	174	1.0407	0.199706	0.0131397	232	0.971945	0.250687	0.0198185	166	0.934313	0.272935	0.0204001	183	0.946206	0.26314	0.0158106	292	0.905156	0.338448	0.0237544	207	hypothetical protein
VC1583		1.02223	0.181824	0.0283962	41	0.999296	0.268134	0.04089	43	1.02601	0.11707	0.021374	30	0.9922	0.117905	0.0218945	29	0.981041	0.204177	0.0285905	51	0.915665	0.305686	0.045569	45	superoxide dismutase, Cu-Zn
VC1584		1.04928	0.180805	0.026097	48	1.0432	0.178335	0.0234166	58	1.0084	0.157554	0.01985	64	1.01924	0.170893	0.0218806	61	0.901993	0.269046	0.0306607	77	0.921944	0.36236	0.0381961	92	ankB protein
VC1585		1.03427	0.181004	0.0228043	63	1.07048	0.17566	0.0207017	72	0.987551	0.207169	0.0218376	91	0.981629	0.207826	0.0219068	91	0.99042	0.256258	0.0256258	100	0.955308	0.27547	0.026756	107	catalase
VC1586		1.05683	0.1288	0.0274602	22	1.00366	0.212355	0.0442791	23	1.07807	0.129275	0.0282102	21	1.0609	0.203895	0.0467766	19	1.00428	0.0944072	0.0201277	22	1.05907	0.146016	0.0286361	26	hypothetical protein
VC1587		0.995746	0.214534	0.039838	29	1.01106	0.256857	0.0391703	43	0.97296	0.176808	0.0353616	25	0.970644	0.149086	0.026355	32	0.880085	0.300743	0.0398343	57	0.891372	0.404039	0.0609112	44	hypothetical protein
VC1588		0.990829	0.259709	0.0396053	43	1.02891	0.206308	0.0262011	62	0.997119	0.209679	0.0280196	57	0.956372	0.283567	0.0369173	59	0.952697	0.310049	0.0338291	84	0.94463	0.307967	0.0379081	66	LysR family transcriptional regulator
VC1589		1.07735	0.15496	0.0221372	49	1.0241	0.19928	0.0245297	66	1.03345	0.155578	0.0217853	51	1.00032	0.219337	0.0288003	58	0.995616	0.244111	0.0278191	77	0.949722	0.263558	0.0317286	69	alpha-acetolactate decarboxylase
VC1590		0.990183	0.257732	0.0263047	96	1.02749	0.125745	0.0109035	133	0.993021	0.22955	0.0238032	97	0.968064	0.222615	0.021521	110	0.991137	0.218828	0.0171927	168	0.934812	0.323884	0.0287401	128	acetolactate synthase
VC1591		1.03043	0.213585	0.0264919	65	1.0453	0.11559	0.0129233	80	0.993813	0.216879	0.0263004	69	0.964295	0.200269	0.0241096	69	0.916954	0.288744	0.0283136	104	0.962787	0.266974	0.0284595	89	short chain dehydrogenase/reductase family oxidoreductase
VC1592		0.963066	0.260986	0.0389054	45	1.01318	0.190679	0.0248243	59	0.966935	0.24442	0.0368477	45	0.892439	0.302533	0.0419538	52	0.90987	0.275613	0.0327093	71	0.964719	0.263226	0.0348652	57	hypothetical protein
VC1593		0.980549	0.278492	0.0293556	90	0.985179	0.261479	0.0250451	109	1.02579	0.186363	0.0194297	92	1.00021	0.14326	0.0150177	91	0.978305	0.229866	0.0200073	136	0.942712	0.266971	0.0245767	119	GGDEF family protein
VC1594	galM	1.05995	0.152018	0.0206871	54	1.02347	0.183044	0.0232466	62	1.05439	0.0902294	0.00978676	85	1.06387	0.0925632	0.0104142	79	0.965239	0.264743	0.0287154	85	1.03283	0.213132	0.0197888	118	aldose 1-epimerase
VC1595		0.989934	0.245346	0.0276036	79	1.01609	0.19889	0.0201942	97	1.01228	0.216473	0.0277166	62	0.982797	0.243481	0.0283041	74	0.987856	0.268123	0.0260424	107	0.956816	0.314898	0.0343582	84	galactokinase
VC1596		1.00696	0.24717	0.03531	49	1.02641	0.114892	0.0141422	66	0.917496	0.321605	0.0429763	57	0.97952	0.229994	0.0287493	64	0.977173	0.262899	0.026832	98	1.01885	0.354607	0.0433221	67	galactose-1-phosphate uridylyltransferase
VC1597		1.0646	0.151215	0.0183375	68	1.06252	0.161446	0.0178287	82	1.01272	0.190008	0.0232132	68	0.967752	0.253669	0.0298952	72	0.982207	0.25721	0.025721	100	0.939382	0.325248	0.0331955	97	multidrug transporter, putative
VC1598		1.05145	0.164598	0.0263568	39	1.08234	0.174401	0.0254391	47	1.01544	0.174027	0.0251186	48	0.993475	0.18644	0.0277928	45	0.905555	0.306022	0.0391821	61	0.965386	0.255245	0.0324161	62	ABC transporter, periplasmic substrate-binding protein-related protein
VC1599		1.03159	0.167168	0.0227486	54	1.0682	0.142941	0.0168458	72	1.03095	0.135458	0.0186066	53	0.998268	0.153679	0.0198398	60	1.02802	0.137914	0.0132098	112	0.961455	0.33837	0.0373667	83	GGDEF family protein
VC1600		1.02219	0.192485	0.0340269	32	1.03284	0.183191	0.0270101	46	1.02591	0.126974	0.0191421	45	0.980879	0.215565	0.030795	49	0.937879	0.266809	0.0353397	57	0.854126	0.351325	0.0446183	62	hypothetical protein
VC1601		1.05859	0.176029	0.0246489	51	1.08847	0.142362	0.01808	62	0.992256	0.171034	0.0246866	48	0.981197	0.242681	0.0327231	55	0.945858	0.282841	0.0322327	77	1.02135	0.236768	0.0291441	66	hypothetical protein
VC1602		0.952322	0.326811	0.0523316	39	1.06541	0.0952929	0.012734	56	0.924804	0.264881	0.0441469	37	0.95172	0.273568	0.0432549	40	0.946138	0.219896	0.0272747	65	0.920306	0.331838	0.0512036	42	chemotaxis protein CheV
VC1603		1.00064	0.159293	0.030656	27	1.04498	0.0628958	0.0104826	36	0.998405	0.210842	0.0378684	31	0.985372	0.16519	0.0267974	38	0.997236	0.242973	0.034023	51	0.911049	0.326018	0.0431822	57	hypothetical protein
VC1604		1.05984	0.105056	0.0170423	38	1.01999	0.0884081	0.013328	44	0.94425	0.294858	0.039402	56	0.967167	0.208167	0.028328	54	1.01692	0.126319	0.0163077	60	0.959489	0.26796	0.0327366	67	response regulator
VC1605		0.954021	0.311729	0.0352963	78	0.995923	0.271054	0.026579	104	0.943162	0.25957	0.0321956	66	0.909539	0.314545	0.0351672	80	0.946551	0.286764	0.0269765	117	0.833777	0.442563	0.0463932	92	sensor kinase citA, putative
VC1606		1.02967	0.205067	0.0226458	82	1.03222	0.168093	0.0157433	114	0.968122	0.227729	0.0236144	94	0.807453	0.360889	0.0362707	102	0.942537	0.25484	0.0208773	153	0.932896	0.350988	0.0337738	109	hypothetical protein
VC1607		0.999985	0.204548	0.0273338	56	0.95518	0.268909	0.0323728	69	0.893679	0.281964	0.0361018	62	0.833624	0.339482	0.0434662	61	0.880902	0.346941	0.0367757	89	0.926575	0.374168	0.046771	64	hypothetical protein
VC1608		1.08873	0.11985	0.0226495	28	1.10399	0.176228	0.0306773	33	0.91434	0.296278	0.0515754	33	0.826378	0.390926	0.0670433	34	0.823141	0.374107	0.0545691	47	0.90935	0.388959	0.0607451	41	hypothetical protein
VC1609		1.02853	0.217942	0.0237795	84	1.03714	0.138043	0.0136683	102	0.936305	0.282726	0.0278578	104	0.8992	0.280834	0.027944	102	0.902445	0.334071	0.0302454	126	0.978597	0.235039	0.0213672	121	hypothetical protein
VC1610		0.9636	0.251895	0.0593722	18	1.05853	0.145298	0.03524	17	0.956579	0.227301	0.0445773	26	0.992147	0.121254	0.0252832	23	0.937071	0.261069	0.0598933	19	0.979873	0.185652	0.0364093	26	hypothetical protein
VC1611		1.03678	0.103778	0.017061	37	1.02207	0.305086	0.0449824	46	1.01233	0.191452	0.0247164	61	1.00249	0.17475	0.0231462	57	0.958518	0.274615	0.0343269	64	0.877729	0.282673	0.0342791	68	homoserine O-succinyltransferase
VC1612		1.07557	0.106625	0.0160743	44	1.04323	0.141217	0.0179345	62	0.945033	0.254745	0.0509491	26	1.00389	0.139997	0.0233329	36	0.93519	0.311873	0.037545	69	0.992063	0.290597	0.0428462	46	fimbrial biogenesis and twitching motility protein, putative
VC1613		1.09228	0.226003	0.0854209	7	1.26571	0.190633	0.0720525	7	1.03638	0.0973158	0.030774	10	1.03091	0.169475	0.0564917	9	0.948774	0.212071	0.0749784	8	1.022	0.177964	0.047563	14	hypothetical protein
VC1614		1.01226	0.213157	0.0287421	55	1.03233	0.225243	0.0303718	55	0.981956	0.190368	0.0229176	69	0.951022	0.265455	0.0342701	60	0.9733	0.238915	0.0277732	74	0.998902	0.267935	0.0292341	85	putative SAM-dependent methyltransferase
VC1615		1.05302	0.0726	0.0116253	39	1.04344	0.110942	0.0150973	54	0.953737	0.303742	0.0463202	44	0.959178	0.235306	0.0332773	50	0.899731	0.325124	0.0375421	76	0.967023	0.335132	0.0451891	55	hypothetical protein
VC1616		1.09985	0.093494	0.0295654	10	1.10281	0.104826	0.028016	14	1.02513	0.137535	0.0381455	13	1.0494	0.0771527	0.0206199	14	0.917535	0.320243	0.0716086	20	0.92876	0.439405	0.113454	15	glutaredoxin, putative
VC1617		1.00323	0.238241	0.040858	34	0.927192	0.271422	0.042389	41	0.979583	0.147795	0.0289851	26	0.93448	0.206614	0.0365245	32	0.969323	0.248631	0.0362666	47	0.923941	0.373874	0.0583893	41	LysR family transcriptional regulator
VC1618		1.01408	0.169289	0.0218551	60	1.00532	0.217921	0.0264267	68	0.978705	0.213428	0.0253292	72	0.949843	0.212034	0.0267138	63	0.940962	0.322153	0.0323776	101	0.997825	0.302262	0.0335847	81	multidrug resistance protein, putative
VC1619		0.994583	0.156887	0.0452893	12	1.0821	0.113121	0.0326551	12	0.969894	0.246041	0.0657571	14	0.963969	0.107083	0.0286192	14	0.914293	0.248147	0.0569287	19	0.989714	0.333778	0.0681321	24	hypothetical protein
VC1620		1.05223	0.122628	0.0033167	1377	1.05335	0.128489	0.00315554	1665	1.0245	0.102493	0.00276001	1397	1.00827	0.0887612	0.00242206	1357	1.01529	0.140163	0.00301027	2210	0.998242	0.175412	0.00402634	1943
VC1621		1.02919	0.209741	0.0219869	91	1.04395	0.115023	0.0104566	121	1.02233	0.189785	0.0197865	94	1.00989	0.0948405	0.00934491	104	0.984023	0.245688	0.0197981	158	0.969072	0.301158	0.0276071	121	agglutination protein
VC1622		0.955468	0.329618	0.0687301	23	0.950331	0.357863	0.0676298	28	1.05864	0.0986839	0.0226396	19	1.02734	0.171749	0.0384043	20	0.882947	0.374822	0.0696028	29	0.903238	0.305775	0.0599673	26	outer membrane protein, putative
VC1623		0.99264	0.245086	0.0270652	82	1.03626	0.206228	0.0209392	97	0.87649	0.254118	0.029343	76	0.769331	0.363912	0.0414716	77	1.08803	0.204105	0.0199186	108	0.943226	0.319896	0.0377001	72	carboxynorspermidine decarboxylase
VC1624		1.04517	0.130863	0.0188884	48	1.01	0.180715	0.023729	58	0.936141	0.253816	0.0322347	62	0.866336	0.303083	0.0391278	60	1.04173	0.233758	0.0259731	81	0.903735	0.388371	0.0454554	73	hypothetical protein
VC1625		1.03006	0.160755	0.0126693	163	1.03262	0.18037	0.0127223	202	0.94367	0.255926	0.0202962	163	0.850523	0.325393	0.0247392	176	1.0093	0.256872	0.0164109	256	0.916448	0.358895	0.0277721	169
VC1627	nhaA	0.905568	0.29115	0.0389066	56	1.03988	0.101418	0.0115577	77	0.909341	0.26065	0.0286101	84	0.938236	0.227481	0.0246738	85	0.994808	0.216409	0.0210195	110	0.839496	0.317805	0.0319406	100	pH-dependent sodium/proton antiporter
VC1628		1.06421	0.117357	0.0137356	73	1.01155	0.211674	0.0220685	92	0.999589	0.16847	0.0212252	63	0.962037	0.236362	0.0282507	70	0.835673	0.30709	0.0298272	107	0.940298	0.332157	0.0327284	103	hypothetical protein
VC1629		0.975123	0.232918	0.022517	107	0.994723	0.13341	0.0112351	141	0.969242	0.281259	0.0284114	100	0.933028	0.286312	0.0262462	121	0.54437	0.448223	0.0348941	173	0.802144	0.383579	0.0324184	142	hypothetical protein
VC1630		1.02444	0.121257	0.0191724	40	1.01524	0.230169	0.031036	55	0.86303	0.35954	0.0554782	43	0.920478	0.282281	0.0399206	50	0.553071	0.425952	0.04886	79	0.773908	0.442196	0.0585703	57	ABC transporter, ATP-binding protein
VC1631		1.07151	0.117053	0.0129264	82	1.05079	0.143066	0.0144519	98	1.00311	0.191255	0.020993	84	0.982868	0.196928	0.0217471	83	0.96864	0.259446	0.0246255	113	0.959917	0.235778	0.0227935	108	hypothetical protein
VC1632		0.990146	0.248855	0.0279983	79	1.02558	0.281568	0.0305403	85	0.975431	0.246093	0.0236803	110	0.984338	0.238627	0.0247445	94	0.938929	0.282322	0.0265586	113	0.956613	0.260525	0.0224224	137	hypothetical protein
VC1633		1.03397	0.250339	0.0417231	36	1.01381	0.219977	0.0343547	41	0.961475	0.256045	0.048388	28	0.91946	0.322393	0.0598668	29	0.92585	0.35781	0.0511157	49	0.967832	0.317106	0.0495236	41	hypothetical protein
VC1634		1.01868	0.215333	0.040694	28	1.04654	0.112664	0.0185219	37	0.975847	0.261706	0.0494578	28	1.01127	0.160801	0.0298599	29	0.884534	0.334154	0.0450574	55	0.846767	0.377192	0.0620099	37	bicyclomycin/multidrug efflux system
VC1635		0.953825	0.27176	0.0459359	35	0.9794	0.203369	0.0317609	41	0.870029	0.345233	0.0509018	46	0.885596	0.287255	0.0410365	49	0.903284	0.314108	0.0431461	53	0.9197	0.284818	0.0406883	49	ribosomal small subunit pseudouridine synthase A
VC1636		1.05103	0.151263	0.014167	114	1.0162	0.186864	0.0154649	146	1.00901	0.163728	0.0155404	112	0.995667	0.136362	0.0124481	122	0.973695	0.231952	0.0172409	186	0.953256	0.31394	0.0256331	151	helicase-related protein
VC1637		0.999069	0.215278	0.0439435	24	1.03022	0.094737	0.0179036	28	0.833393	0.343735	0.0661518	27	0.798924	0.378359	0.0742023	26	0.652965	0.440398	0.0744408	35	0.787648	0.473129	0.105795	20	hypothetical protein
VC1638		1.01078	0.185272	0.0313167	35	1.06154	0.117498	0.0175155	45	1.03478	0.0916211	0.0195337	22	1.03027	0.0792135	0.0158427	25	0.934084	0.252594	0.0334569	57	0.973289	0.302905	0.0467392	42	DNA-binding response regulator
VC1639		0.545704	0.402879	0.0462134	76	0.393535	0.387482	0.0413058	88	0.186606	0.304764	0.0359168	73	0.102823	0.278491	0.0340231	67	0.0712033	0.173129	0.0218122	63	0.0530363	0.17864	0.0675197	7	sensor histidine kinase
VC1640		ND				ND				ND				ND				ND				ND				50S ribosomal protein L25	Essential
VC1641		1.05727	0.116334	0.0106643	119	1.05212	0.156944	0.0128144	150	1.02797	0.141728	0.0132162	117	1.03105	0.118033	0.0103522	130	0.94421	0.26446	0.0198781	184	0.963979	0.259487	0.0197857	173	hypothetical protein
VC1642		1.04206	0.0978429	0.0156674	39	1.04255	0.123248	0.0174299	50	1.02388	0.103539	0.015266	47	0.99024	0.157133	0.0226803	48	0.95325	0.215694	0.0249062	75	1.00836	0.283212	0.0356813	63	hypothetical protein
VC1643		1.00937	0.237611	0.0234125	103	1.03555	0.139164	0.0118896	137	1.01672	0.147476	0.0136342	118	0.960455	0.209246	0.0193448	119	0.933083	0.293508	0.0220614	184	0.953866	0.289361	0.0237054	152	methyl-accepting chemotaxis protein
VC1644		1.0237	0.213406	0.0204406	109	1.03715	0.156121	0.0131946	140	1.01055	0.189121	0.0181982	108	1.00801	0.161188	0.0153686	111	0.982364	0.222927	0.0175148	167	0.993667	0.271951	0.0239439	130	hypothetical protein
VC1645		1.03367	0.107512	0.0260755	17	1.02033	0.0897309	0.0175977	26	0.851651	0.362704	0.0791485	21	0.952971	0.229573	0.0459145	25	0.902476	0.287212	0.0472173	37	0.965841	0.343942	0.0638685	29	hypothetical protein
VC1646		1.04701	0.175284	0.0365492	23	1.0726	0.136032	0.0257076	28	1.01366	0.213451	0.0435705	24	0.958476	0.163711	0.0327423	25	0.873374	0.317766	0.0590077	29	1.01956	0.243103	0.0459422	28	hypothetical protein
VC1647		1.03154	0.18248	0.021968	69	1.04019	0.15327	0.0162466	89	1.01514	0.179956	0.0190753	90	1.00133	0.177561	0.018314	95	0.970429	0.236523	0.0225516	113	0.938645	0.328803	0.0303979	118	hypothetical protein
VC1648		ND			3	ND			4	ND				ND				ND			3	ND				hypothetical protein
VC1649		1.05367	0.105579	0.0203187	27	1.07078	0.129759	0.0236906	30	0.936752	0.263691	0.0466144	32	0.982634	0.20855	0.0374567	31	0.988549	0.117353	0.0187915	39	1.0453	0.217058	0.037785	33	trypsin, putative
VC1650		1.02671	0.1917	0.0144091	178	1.03607	0.198467	0.0127579	242	1.01752	0.178542	0.0126565	205	0.983457	0.197979	0.0134708	222	0.964224	0.229601	0.0129572	326	0.98886	0.275336	0.0171416	268	collagenase
VC1651		1.02711	0.132278	0.0217463	37	1.035	0.191879	0.0289269	44	0.955033	0.289911	0.042745	46	1.01272	0.06623	0.0101	43	0.992756	0.241137	0.0303804	63	0.948075	0.302253	0.0383861	62	response regulator VieB
VC1652		0.996565	0.227109	0.0233009	95	1.02765	0.123731	0.0108939	129	0.909816	0.334153	0.0356209	90	0.94868	0.259479	0.0252028	107	0.935127	0.261446	0.021068	160	0.890777	0.339284	0.0331107	106	response regulator VieA
VC1653		1.03672	0.161781	0.00798979	414	1.03452	0.180873	0.0079548	520	1.0018	0.184631	0.00888308	445	1.00911	0.14084	0.00662454	462	0.983912	0.211566	0.00822895	688	0.980613	0.27299	0.0113158	602	sensory box sensor histidine kinase/response regulator VieS
VC1654		0.941552	0.305015	0.073977	17	1.04646	0.124418	0.0248836	25	0.900442	0.34375	0.103645	11	1.06599	0.128707	0.0407008	10	0.549285	0.501324	0.0915289	30	1.02972	0.3192	0.0713753	20	hypothetical protein
VC1655		0.618189	0.385667	0.0502096	59	0.884195	0.267797	0.0311308	74	0.750448	0.362866	0.0489289	56	0.616489	0.433426	0.0546065	63	0.330475	0.48415	0.0510338	90	0.74358	0.431916	0.0666461	42	magnesium transporter
VC1656		1.00846	0.178489	0.0320576	31	1.05011	0.168297	0.0273013	38	1.00239	0.156166	0.0263969	35	1.00286	0.197618	0.0316442	39	0.967348	0.263375	0.0361773	53	0.974688	0.287337	0.0406356	50	hypothetical protein
VC1657		ND			2	ND			1	0.968932	0.26556	0.108414	6	0.950724	0.280629	0.114566	6	ND			2	ND			4	hypothetical protein
VC1658		1.05989	0.126032	0.0178237	50	1.04155	0.0944013	0.01162	66	1.00856	0.183138	0.0217345	72	1.00845	0.13176	0.0153168	74	0.948649	0.261448	0.0266839	99	0.966229	0.321529	0.0350817	85	serine transporter
VC1659		1.055	0.0880402	0.012842	47	1.03038	0.153927	0.0207556	55	0.992047	0.234622	0.0353707	44	0.971723	0.219438	0.0313483	49	0.993395	0.185458	0.0223265	69	0.968502	0.256779	0.0313705	67	hypothetical protein
VC1660		1.02801	0.200406	0.0169982	139	1.02753	0.132437	0.0101277	171	1.01255	0.214413	0.0183185	140	1.01313	0.153339	0.0125201	151	0.94972	0.283819	0.0194015	224	0.985014	0.247725	0.0185158	182
VC1661		1.07825	0.128731	0.0344048	14	1.01383	0.0509686	0.0136219	14	1.01443	0.0957233	0.0302704	10	1.01997	0.0883888	0.0294629	9	1.02529	0.361429	0.100242	13	0.900164	0.335716	0.0931108	13	hypothetical protein
VC1662		0.994171	0.215561	0.0414848	27	1.0295	0.119488	0.0211227	32	1.01877	0.0863922	0.0215981	16	0.991383	0.136412	0.0290832	22	0.986997	0.198274	0.032596	37	0.941639	0.260468	0.0501272	27	hypothetical protein
VC1663		1.0547	0.0701884	0.0248154	8	1.0527	0.139017	0.0385562	13	0.961926	0.225493	0.0625406	13	1.01371	0.0582432	0.0155661	14	0.880894	0.32531	0.0727416	20	0.862454	0.354744	0.0915945	15	heat shock protein HslJ
VC1664		1.02167	0.253025	0.0357832	50	1.03048	0.129075	0.0165264	61	0.921111	0.299664	0.044183	47	0.975638	0.173437	0.0247767	49	0.906458	0.273506	0.0320114	73	0.913365	0.393034	0.0525214	57	hypothetical protein
VC1665		0.998682	0.236277	0.0237467	99	1.02307	0.186487	0.016356	130	1.02347	0.108315	0.0109977	98	0.954883	0.22824	0.0217618	110	0.97331	0.268802	0.020863	172	0.990824	0.270202	0.022362	146	ABC transporter, permease protein, putative
VC1666		1.02077	0.206843	0.0315433	43	1.02072	0.221517	0.0296015	56	1.02296	0.178595	0.0285981	39	0.992061	0.204625	0.0305037	45	0.927089	0.31549	0.0391317	65	0.98132	0.223073	0.0283303	62	ABC transporter, ATP-binding protein, putative
VC1667		1.03808	0.154261	0.0296875	27	1.02872	0.215867	0.0354882	37	0.914309	0.297975	0.0608239	24	0.855804	0.356569	0.0673851	28	0.835274	0.357328	0.0521217	47	0.978473	0.355757	0.0697697	26	hypothetical protein
VC1668		1.05511	0.212432	0.0401458	28	0.989195	0.213563	0.0318361	45	0.835807	0.416237	0.0832474	26	0.984283	0.153598	0.0252514	37	0.948203	0.299337	0.0377129	63	0.824688	0.432196	0.0683361	40	pseudouridine synthase Rlu family protein
VC1669		1.00965	0.259933	0.0315215	68	1.02445	0.210133	0.0233481	81	1.01301	0.146677	0.0156359	89	0.970161	0.204417	0.0228545	80	0.977842	0.29232	0.0285275	105	0.934516	0.273367	0.0279004	97	sodium-dependent transporter, putative
VC1670	cls	1.03485	0.192287	0.0311931	38	1.02459	0.278504	0.0393865	50	0.993401	0.197082	0.030779	42	1.02972	0.087596	0.0127772	47	0.833672	0.361399	0.0420117	74	0.946247	0.294601	0.034719	72	cardiolipin synthetase
VC1671		1.0096	0.184518	0.0253456	53	1.03183	0.16356	0.0188863	75	0.996109	0.201094	0.0251368	64	0.988555	0.197791	0.0229928	74	0.918795	0.261665	0.0262983	101	0.897425	0.361731	0.0406979	80	cystathionine beta-lyase
VC1672		1.01251	0.194655	0.0275284	50	1.02094	0.147651	0.0179053	68	1.00244	0.116773	0.0166819	49	0.974015	0.189038	0.0250387	57	0.990389	0.22216	0.0243853	83	0.920027	0.346377	0.0399961	75	DNA-3-methyladenine glycosidase I
VC1673		1.02459	0.148999	0.0106975	196	1.03571	0.151147	0.00942831	258	0.998687	0.165801	0.0118732	201	0.974808	0.201344	0.0136367	222	0.976581	0.234038	0.0129821	339	0.966009	0.283104	0.0169794	286	AcrB/AcrD/AcrF family transporter
VC1674		0.979916	0.257717	0.0291807	78	0.994483	0.222598	0.0226014	97	0.996573	0.217545	0.0256379	72	1.00538	0.133018	0.0145135	84	0.964518	0.2599	0.0246686	113	0.932803	0.28873	0.0291661	98	periplasmic linker protein, putative
VC1675		1.01845	0.230448	0.0316544	53	1.04843	0.133019	0.0157865	71	0.948954	0.277766	0.038895	52	0.920795	0.295517	0.0375307	62	0.850344	0.398309	0.0427032	87	0.920824	0.290842	0.0352698	68	multidrug resistance protein, putative
VC1676		0.972261	0.30077	0.060154	25	0.911923	0.340277	0.0631879	29	1.04812	0.094511	0.0175502	29	1.03711	0.0938182	0.0180553	27	1.00224	0.251218	0.0424635	35	0.960899	0.290417	0.0448123	42	phage shock protein C
VC1677	pspB	ND			4	1.01815	0.149548	0.0668797	5	0.977532	0.0796798	0.0356339	5	ND			3	0.778353	0.592809	0.224061	7	ND			3	phage shock protein B
VC1678		0.991974	0.272073	0.0496735	30	1.01531	0.305604	0.0540237	32	0.939193	0.261125	0.0365648	51	0.95803	0.255983	0.036569	49	0.800645	0.344075	0.054403	40	0.880799	0.322471	0.0409538	62	phage shock protein A
VC1679		1.01585	0.282641	0.0374368	57	1.08317	0.206861	0.0249031	69	0.994276	0.192823	0.030488	40	0.926072	0.303474	0.0438027	48	0.826785	0.424997	0.048433	77	0.995886	0.25875	0.0345769	56	psp operon transcriptional activator
VC1680		0.66197	0.443415	0.0587318	57	0.556285	0.459825	0.0514099	80	0.496371	0.486818	0.0903998	29	0.253384	0.419462	0.0753376	31	0.312989	0.440228	0.0593604	55	0.285003	0.418365	0.101468	17	peptide ABC transporter, periplasmic peptide-binding protein
VC1681		0.621811	0.3672	0.08655	18	0.507555	0.418828	0.0913958	21	ND			4	ND			4	0.072236	0.20781	0.0555395	14	0.0631618	0.125768	0.0562454	5	peptide ABC transporter, permease protein
VC1682		0.475492	0.470373	0.114082	17	0.390587	0.411962	0.0764994	29	0.255645	0.461627	0.111961	17	0.0783128	0.251716	0.0610501	17	0.024668	0.0982885	0.025378	15	ND			4	peptide ABC transporter, permease protein
VC1683		0.570521	0.426079	0.077791	30	0.706152	0.367669	0.0525241	49	0.0316018	0.16949	0.0437622	15	0.0542996	0.216002	0.0460518	22	0.0480768	0.241533	0.0368335	45	ND			1	peptide ABC transporter, ATP-binding protein
VC1684		0.758341	0.384565	0.115951	11	0.949236	0.20815	0.053744	15	0.634595	0.372169	0.0994665	14	0.268812	0.431301	0.130042	11	0.256158	0.400714	0.09193	19	0.284166	0.383611	0.121308	10	peptide ABC transporter, ATP-binding protein
VC1685		0.994436	0.267001	0.0471995	32	1.00082	0.117216	0.0183061	41	0.815038	0.42913	0.085826	25	0.978795	0.208586	0.0368731	32	0.939781	0.320909	0.0453833	50	0.941047	0.323795	0.0547313	35	hypothetical protein
VC1686		1.02591	0.0801526	0.0170886	22	1.00858	0.117008	0.0234016	25	1.01724	0.130548	0.0238346	30	0.958039	0.153695	0.0280607	30	0.973379	0.127973	0.0199861	41	0.925075	0.341527	0.0526987	42	hypothetical protein
VC1687		1.04449	0.142586	0.0220015	42	1.00071	0.25194	0.0356298	50	1.00919	0.125446	0.0209076	36	0.954991	0.284023	0.0473371	36	0.967035	0.324203	0.0437155	55	0.99826	0.33417	0.0492706	46	putative manganese-dependent inorganic pyrophosphatase
VC1688		0.982551	0.217423	0.0276127	62	1.00357	0.251621	0.0283096	79	0.939436	0.267287	0.0289913	86	0.929834	0.2638	0.0278069	91	0.933263	0.302444	0.0283265	116	0.925172	0.383409	0.0381507	102	hypothetical protein
VC1689		1.03369	0.178855	0.0266622	45	1.03082	0.0985211	0.013933	50	0.966636	0.247003	0.0333059	55	0.945058	0.257532	0.0353748	53	0.958711	0.284416	0.036718	60	0.927324	0.350845	0.0425462	69	hypothetical protein
VC1690		1.04523	0.154615	0.0188892	67	1.05423	0.162315	0.0176056	85	1.01208	0.152815	0.0168756	83	1.00078	0.132185	0.0138568	91	0.97955	0.254499	0.024156	113	0.948476	0.300744	0.0293496	106	alpha-1,6-galactosidase, putative
VC1691		1.04568	0.0277022	0.0123888	5	1.0794	0.0483842	0.0216381	5	1.06411	0.0648821	0.0245231	7	1.05537	0.0364785	0.0148923	6	1.00562	0.233391	0.0882134	7	0.981636	0.208022	0.0600509	12	hypothetical protein
VC1692		1.02011	0.157909	0.01298	149	1.03364	0.130343	0.00933406	196	1.01854	0.141483	0.0122681	136	0.998712	0.178701	0.0143536	156	0.985366	0.202835	0.0130387	251	0.939542	0.332116	0.0239062	197	trimethylamine-N-oxide reductase
VC1693		1.04889	0.165869	0.0180978	84	1.06752	0.151853	0.0141604	115	0.986902	0.252334	0.0275319	86	0.980304	0.242519	0.0243741	101	0.950212	0.271889	0.0225017	148	0.971074	0.31544	0.0310812	104	cytochrome c-type protein TorC
VC1694		0.877162	0.395255	0.0806812	24	1.01167	0.10897	0.0181617	36	1.08818	0.0796071	0.0281454	8	0.94293	0.271947	0.0679867	16	0.843654	0.402287	0.0613483	43	1.0369	0.314769	0.081273	15	napE protein
VC1695		0.954702	0.315584	0.0518817	37	0.979743	0.280286	0.0443172	40	1.01993	0.0799797	0.0146022	30	0.937441	0.259293	0.0451371	33	0.967898	0.247364	0.0360817	47	0.843559	0.372559	0.0589067	40	formate transporter 1, putative
VC1696		1.04876	0.119535	0.0244	24	1.07398	0.137733	0.0275466	25	0.955166	0.246673	0.0411122	36	0.913647	0.299524	0.0506288	35	0.866098	0.366373	0.0572178	41	0.955971	0.300274	0.0416405	52	DNA-binding protein inhibitor Id-2-related protein
VC1697		1.06562	0.104722	0.0161589	42	1.04511	0.082592	0.0116803	50	1.03156	0.130141	0.0182233	51	1.00311	0.14562	0.0191209	58	1.00678	0.183147	0.0223749	67	0.979034	0.274663	0.0323693	72	hypothetical protein
VC1698		1.03718	0.115067	0.0225664	26	1.05199	0.21233	0.0387659	30	1.00987	0.100334	0.0186315	29	1.00648	0.0799468	0.0153858	27	0.963177	0.204294	0.0315232	42	1.01246	0.257631	0.040735	40	hypothetical protein
VC1699		1.06564	0.0963168	0.0290406	11	1.01554	0.0857789	0.0258633	11	0.995551	0.25684	0.0622928	17	0.991941	0.255493	0.0638733	16	0.974547	0.266151	0.0567436	22	0.902704	0.263895	0.0562625	22	hypothetical protein
VC1700		1.03939	0.101321	0.0164364	38	1.06337	0.113831	0.0166039	47	0.993872	0.166531	0.0240367	48	0.952373	0.175522	0.0248226	50	1.03424	0.190415	0.0239901	63	0.903801	0.338889	0.0444984	58	intracellular septation protein A
VC1701		1.06001	0.138077	0.029438	22	0.995999	0.189875	0.0330529	33	1.11766	0.101909	0.0282645	13	1.01343	0.0789625	0.017231	21	0.949366	0.298314	0.0490425	37	0.918926	0.395824	0.0843899	22	hypothetical protein
VC1702		ND				ND				ND			1	ND			2	ND				ND			2	YciI-like protein
VC1703		ND			3	ND			3	ND				ND			1	ND			3	ND			1	hypothetical protein
VC1704		1.03332	0.206672	0.0160894	167	1.0385	0.211841	0.0144139	216	1.01378	0.197903	0.016435	150	0.992519	0.189065	0.0147635	167	0.951775	0.251866	0.0160911	255	0.945679	0.323122	0.0238209	189	5-methyltetrahydropteroyltriglutamate-- homocysteine methyltransferase
VC1705		ND				ND				ND				ND				ND				ND				hypothetical protein	Essential
VC1706		1.0419	0.122175	0.0195636	39	1.03121	0.0755878	0.0105844	51	0.96925	0.243564	0.046874	27	1.03762	0.0720878	0.0123629	34	0.899646	0.314216	0.0399054	62	0.998162	0.324899	0.051371	40	transcriptional activator MetR
VC1707		1.02418	0.0975167	0.0325056	9	1.05165	0.0406504	0.0112744	13	0.849342	0.366433	0.138499	7	1.01865	0.0698179	0.0220784	10	0.930547	0.27824	0.0655818	18	1.05807	0.217896	0.0582351	14	hypothetical protein
VC1708		0.920281	0.361033	0.0628479	33	1.01289	0.220529	0.0336303	43	0.99639	0.247045	0.0515125	23	0.973313	0.202829	0.0376645	29	0.96927	0.305043	0.0459869	44	0.859712	0.356735	0.0578701	38	hypothetical protein
VC1709		1.04693	0.122536	0.010283	142	1.04751	0.148999	0.0107812	192	1.01761	0.121547	0.0107016	131	0.991699	0.172373	0.0138902	155	0.981964	0.226622	0.0149106	239	0.959124	0.320921	0.0232821	194	zinc protease
VC1710		1.05393	0.185459	0.0185459	100	1.05374	0.207734	0.0193713	115	0.998467	0.213249	0.0217647	97	0.997543	0.188068	0.0188068	101	0.984629	0.225122	0.0189587	143	0.990523	0.251614	0.0223271	129	hypothetical protein
VC1711		1.03907	0.18854	0.0178954	111	1.04767	0.144508	0.0118785	148	1.00313	0.203025	0.0211668	94	0.966493	0.214067	0.0204105	113	0.959822	0.272817	0.0199504	196	0.987252	0.297037	0.0259522	133	hypothetical protein
VC1712		1.06377	0.087886	0.0207149	18	1.04695	0.133074	0.0290392	21	0.928893	0.285517	0.0655021	19	0.852207	0.258147	0.0626097	17	0.924408	0.285891	0.0513476	31	0.827654	0.348605	0.0647343	29	hypothetical protein
VC1713		1.01123	0.111975	0.0289119	15	1.04582	0.0897173	0.0195779	21	1.05551	0.0550502	0.0246192	5	1.02436	0.055549	0.0185163	9	1.00026	0.154859	0.0322904	23	1.04295	0.167123	0.0431511	15	AsnC family transcriptional regulator
VC1714	mukB	0.733485	0.299539	0.0183659	269	0.669477	0.372723	0.0200088	349	0.154085	0.299853	0.0199459	235	0.103134	0.274612	0.0171969	263	0.232311	0.40244	0.0221201	353	0.596951	0.536479	0.14338	14	cell division protein MukB
VC1715		0.694952	0.357405	0.0526965	46	0.644934	0.37711	0.049517	58	0.206471	0.326844	0.0568962	33	0.0729523	0.226987	0.0373165	37	0.225851	0.378228	0.0505429	56	ND			1	condesin subunit E
VC1716		0.582789	0.399156	0.0491327	66	0.562501	0.426822	0.04657	84	0.152608	0.294557	0.0408477	53	0.0756418	0.245465	0.0314286	61	0.267897	0.436909	0.0550453	63	ND			1	condesin subunit F
VC1717		0.948737	0.290061	0.0558223	27	0.969762	0.237385	0.038509	38	0.827255	0.423501	0.0847002	25	0.655286	0.456487	0.0895245	26	0.851406	0.378944	0.0571279	44	0.84665	0.358411	0.0896026	16	putative metallothionein SmtA
VC1718		1.0512	0.218476	0.0392395	31	1.08244	0.198927	0.0336248	35	0.904551	0.263168	0.046522	32	0.745146	0.404401	0.0683563	35	1.04395	0.297163	0.0458533	42	0.860092	0.346128	0.0510339	46	hypothetical protein
VC1719		1.07531	0.131223	0.0169408	60	1.05623	0.12231	0.0144144	72	1.00148	0.113356	0.0136465	70	1.01238	0.0858949	0.0102664	70	0.975872	0.240701	0.0246954	96	0.938718	0.32134	0.0336856	92	DNA-binding transcriptional regulator TorR
VC1720	torD	0.998539	0.220644	0.0312038	50	1.02844	0.147381	0.0167956	77	0.996171	0.200986	0.0293168	48	1.00138	0.0888409	0.0114693	60	0.964543	0.290179	0.0293125	99	0.940298	0.312895	0.0410851	58	chaperone protein TorD
VC1721		0.92146	0.209236	0.0259525	65	0.99107	0.192315	0.0213683	81	0.923863	0.254196	0.0345918	55	0.882183	0.255672	0.0327354	61	0.739096	0.376223	0.0381997	98	0.830301	0.366281	0.0431666	72	LacI family transcription regulator
VC1722		1.01085	0.233897	0.0413475	32	1.0353	0.206071	0.0300585	47	0.988107	0.156899	0.0327156	23	1.00566	0.104987	0.0188563	31	0.973192	0.296921	0.0396778	56	0.996356	0.404745	0.0684144	35	hypothetical protein
VC1723		1.07319	0.0940459	0.0251348	14	1.06027	0.24325	0.0674653	13	0.972987	0.241467	0.0553963	19	1.0136	0.0786885	0.0203173	15	1.05177	0.137133	0.0314604	19	0.896988	0.246722	0.0493444	25	hypothetical protein
VC1724		1.06667	0.15521	0.0517366	9	1.06533	0.126211	0.0350046	13	ND			3	1.01099	0.147458	0.0659452	5	0.738348	0.471399	0.125987	14	0.93182	0.225115	0.0711876	10	hypothetical protein
VC1725		1.03449	0.190569	0.0294054	42	1.06259	0.194753	0.0287148	46	0.951461	0.295983	0.0410454	52	0.931859	0.286775	0.0393916	53	0.785854	0.397157	0.0485205	67	0.937879	0.258727	0.0320911	65	beta-ketoadipate enol-lactone hydrolase, putative
VC1726	glgA	0.936942	0.300337	0.0408707	54	0.955848	0.296913	0.0362737	67	0.580994	0.399604	0.0507498	64	0.471451	0.436594	0.0554475	62	0.777473	0.455402	0.0469711	94	0.32081	0.403148	0.070179	33	glycogen synthase
VC1727	glgC	1.04135	0.122811	0.0187285	43	1.05108	0.0919874	0.0125179	54	0.973852	0.231334	0.0408944	32	0.993085	0.104674	0.0169804	38	0.968859	0.214216	0.0257886	69	0.859711	0.376629	0.0507846	55	glucose-1-phosphate adenylyltransferase
VC1728		ND				ND				ND				ND				ND				ND				hypothetical protein	Essential
VC1729		ND			4	1.0674	0.0544355	0.0192458	8	ND			4	0.985277	0.0312015	0.012738	6	1.04916	0.091729	0.0264799	12	0.998782	0.176195	0.0719313	6	hypothetical protein
VC1730		0.585751	0.469655	0.121264	15	0.635561	0.491287	0.112709	19	0.206451	0.402604	0.111662	13	0.153173	0.355915	0.0889788	16	0.183671	0.354779	0.0860466	17	0.368395	0.484856	0.216834	5	DNA topoisomerase I
VC1731		1.01626	0.193103	0.0402648	23	0.998462	0.148803	0.0281211	28	0.949384	0.293124	0.0526466	31	0.980764	0.21096	0.0378895	31	0.98615	0.157627	0.0259137	37	0.930883	0.271865	0.0424582	41	hypothetical protein
VC1732		0.930579	0.280565	0.0353479	63	1.02017	0.191308	0.0211264	82	0.224309	0.355192	0.0487893	54	0.0921973	0.253209	0.0326891	60	0.529499	0.493024	0.0505832	97	0.214377	0.315902	0.141276	5	3-phosphoshikimate 1-carboxyvinyltransferase
VC1733		1.00345	0.039335	0.0175912	5	1.03972	0.0715114	0.0238371	9	0.468856	0.440798	0.146933	9	0.477743	0.494862	0.164954	9	0.926942	0.262928	0.0702704	14	0.688835	0.628307	0.256505	6	hypothetical protein
VC1734		0.932447	0.22962	0.102689	5	1.00357	0.0297395	0.0105145	8	ND			2	ND			4	0.898207	0.373663	0.124554	9	ND			2	hypothetical protein
VC1735	aat	1.06073	0.0740079	0.0137429	29	1.03464	0.135694	0.0243714	31	0.984419	0.178524	0.0285867	39	0.992218	0.093509	0.0153728	37	1.03238	0.168937	0.0267113	40	0.984877	0.218384	0.0305798	51	leucyl/phenylalanyl-tRNA--protein transferase
VC1736		1.00631	0.249926	0.0441811	32	1.02926	0.209482	0.030556	47	0.967095	0.231853	0.0473267	24	0.980384	0.222563	0.0387432	33	0.942553	0.24621	0.0326113	57	0.981334	0.180947	0.0310322	34	arginyl-tRNA-protein transferase
VC1737	infA	ND				ND				ND				ND				ND				ND				translation initiation factor IF-1	Essential
VC1738		ND				ND				ND				ND				ND				ND			1	hypothetical protein	Essential
VC1739		ND				ND				ND				ND				ND				ND				hypothetical protein	Essential
VC1740		1.04165	0.123409	0.00859828	207	1.03649	0.165962	0.0103324	258	1.01491	0.146601	0.00973022	232	0.994975	0.172983	0.0110515	251	0.661002	0.389281	0.0217956	339	0.968378	0.275588	0.0152869	335	acyl-CoA dehydrogenase
VC1741		0.991591	0.269601	0.0462362	34	0.986725	0.183379	0.0273366	45	0.99953	0.130747	0.0278755	22	0.960519	0.218755	0.0429014	26	0.660381	0.453924	0.0648463	49	0.84676	0.40854	0.0690559	35	TetR family transcriptional regulator
VC1742		ND			3	1.04376	0.0864973	0.0386828	5	0.995636	0.059873	0.0226299	7	0.868975	0.343179	0.121332	8	1.07674	0.0767267	0.027127	8	0.908908	0.340534	0.107686	10	hypothetical protein
VC1743		1.04672	0.148734	0.0162282	84	1.02709	0.104436	0.0100962	107	1.01719	0.165058	0.0183398	82	0.983377	0.195671	0.0212235	85	0.986795	0.259434	0.0227539	135	0.950451	0.291735	0.0274441	114	hypothetical protein
VC1744		0.925253	0.263467	0.0760564	12	1.02933	0.153653	0.0372664	17	0.900837	0.328391	0.0990135	11	0.929613	0.309942	0.0894725	12	0.92187	0.281556	0.0600279	22	0.953782	0.292217	0.0924072	10	hypothetical protein
VC1745		1.00523	0.197796	0.0251202	62	1.0505	0.11791	0.0131828	80	0.978294	0.216073	0.0247853	76	0.985573	0.164319	0.0186055	78	0.976811	0.238963	0.0226814	113	0.933856	0.371575	0.0375347	99	succinate-semialdehyde dehydrogenase
VC1746		1.05799	0.0659547	0.012693	27	1.0111	0.153876	0.0263895	34	0.931631	0.270155	0.0519914	27	0.843424	0.346158	0.0642799	29	0.958778	0.316216	0.0482225	43	0.832719	0.406956	0.0769075	28	TetR family transcriptional regulator
VC1747		1.04054	0.0305684	0.0136706	5	1.02507	0.0212335	0.00866852	6	0.951714	0.237695	0.0751658	10	0.907314	0.265859	0.0886197	9	1.05821	0.0636415	0.0225007	8	1.08601	0.147801	0.0492669	9	hypothetical protein
VC1748		1.01453	0.202364	0.0254955	63	1.01863	0.22051	0.0269396	67	0.966818	0.239665	0.0259953	85	0.984825	0.236152	0.0262391	81	0.954929	0.248148	0.0270752	85	0.989364	0.195354	0.0197338	98	hypothetical protein
VC1749		1.04986	0.18583	0.0246138	57	1.03653	0.198676	0.0234142	72	0.987027	0.209582	0.0256045	68	0.962135	0.239617	0.0273069	77	0.944724	0.266582	0.0269289	99	0.963921	0.362849	0.0398278	83	hypothetical protein
VC1750		1.03388	0.11861	0.0122337	94	1.04396	0.149906	0.0144248	108	0.994233	0.199261	0.0197298	102	0.989065	0.181538	0.0177163	106	0.979441	0.237929	0.0201808	144	1.00078	0.298209	0.0273368	121	hypothetical protein
VC1751		1.03303	0.175252	0.023419	56	1.02821	0.111549	0.0130558	73	0.955443	0.278368	0.0445746	40	0.952533	0.247314	0.0336552	54	0.964045	0.287358	0.0311683	86	0.936753	0.404514	0.050964	63	hypothetical protein
VC1752		ND			4	1.05111	0.0359247	0.016066	5	ND				ND			2	0.761216	0.352994	0.144109	6	ND			2	hypothetical protein
VC1753		1.02317	0.18831	0.0209233	81	1.03772	0.192178	0.0180786	113	0.927812	0.3285	0.0364999	83	0.932728	0.276201	0.0279005	99	0.978808	0.248198	0.0207554	146	0.818737	0.417852	0.0428707	95	paraquat-inducible protein A
VC1754		1.01345	0.186865	0.0223346	70	1.00804	0.189482	0.0210536	81	0.934746	0.189541	0.0229853	69	0.812283	0.385108	0.0441749	77	0.953031	0.287664	0.0274277	111	0.86166	0.423617	0.0441651	93	paraquat-inducible protein B
VC1755		1.06103	0.140923	0.0228607	38	1.0458	0.124447	0.0177781	49	1.01311	0.202828	0.0347847	35	0.860603	0.340729	0.0525757	42	0.992156	0.257223	0.0314247	67	0.942696	0.302868	0.0451489	45	hypothetical protein
VC1756		1.02959	0.247682	0.0346824	51	1.03646	0.114096	0.0137356	69	1.00197	0.188745	0.0284544	45	0.943087	0.287529	0.0387704	55	0.979898	0.197618	0.0210661	89	0.933103	0.347093	0.0451877	59	periplasmic linker protein, putative
VC1757		1.01136	0.207739	0.0171926	147	1.01978	0.20004	0.0149936	179	1.00258	0.194124	0.0160111	150	1.00723	0.148062	0.0120893	152	0.97677	0.238866	0.0166831	215	0.951235	0.300877	0.0217707	195	AcrB/AcrD/AcrF family transporter
VC1758		1.0178	0.216781	0.0279864	60	1.0592	0.11601	0.0132205	77	0.995536	0.204347	0.0247807	69	1.02534	0.148363	0.0177327	70	0.989651	0.232249	0.0234607	98	0.95275	0.318956	0.0327242	96	phage family integrase
VC1759		1.04494	0.0679702	0.0196213	12	1.03798	0.137815	0.0415527	11	0.94907	0.279536	0.072176	15	0.9554	0.114064	0.0343916	11	0.946472	0.249217	0.0587411	18	0.89089	0.33514	0.0812835	17
VC1760		1.02745	0.137807	0.0140649	96	1.05155	0.229402	0.0215803	113	0.997816	0.183256	0.0168701	119	0.951914	0.269091	0.024165	125	0.947507	0.280565	0.0232197	150	0.978444	0.281316	0.0225958	157	helicase, putative
VC1761		1.04467	0.140038	0.0211115	44	1.06465	0.143273	0.019497	54	0.949011	0.232332	0.0319132	55	0.970392	0.236652	0.0328177	52	0.98835	0.222556	0.0262285	72	0.939812	0.374588	0.0471937	63	hypothetical protein
VC1762		0.968003	0.26079	0.0289767	81	1.00765	0.223171	0.0218837	104	1.01686	0.148742	0.0159468	88	1.01997	0.185225	0.0199733	87	0.95901	0.257115	0.0224643	134	0.964825	0.311736	0.0294563	113	hypothetical protein
VC1763		1.03071	0.111211	0.0218102	26	0.96021	0.331154	0.0614938	29	1.02281	0.211225	0.0342652	38	0.983835	0.241381	0.0408009	35	0.859383	0.351519	0.0562882	39	0.812936	0.424149	0.0670638	40	chemotaxis protein MotB-related protein
VC1764		1.02617	0.183593	0.017585	109	1.04449	0.18495	0.015744	138	0.988221	0.198422	0.0200437	99	0.968117	0.191749	0.0185371	107	0.938959	0.270103	0.0207772	173	0.934663	0.342875	0.0288753	143	hypothetical protein
VC1765		0.98877	0.212128	0.0172627	152	1.00555	0.225026	0.0161559	195	0.985188	0.206632	0.0161353	169	0.988815	0.191911	0.0143042	184	0.976642	0.211891	0.0137349	247	0.948094	0.280855	0.0183209	240	type I restriction enzyme HsdR, putative
VC1766		1.01089	0.199389	0.0187569	114	1.01229	0.188221	0.0151183	155	0.982708	0.207381	0.0209487	101	0.981293	0.191104	0.0174453	121	0.950622	0.253242	0.0182761	199	0.946756	0.338663	0.0276517	152	hypothetical protein
VC1767		1.0254	0.171049	0.0163835	110	1.04214	0.132515	0.0112398	139	0.981235	0.186689	0.0211383	79	0.960229	0.193908	0.0205542	90	0.994628	0.193757	0.015513	162	0.954462	0.335289	0.0312659	116	hypothetical protein
VC1768		1.00285	0.200359	0.0226862	78	1.03323	0.172119	0.0170423	102	0.950126	0.307049	0.0372352	69	0.949208	0.25811	0.0296073	76	0.966344	0.232435	0.0210437	123	1.0268	0.21204	0.0222279	91	hypothetical protein
VC1769		0.951276	0.301199	0.0260197	135	1.00077	0.223878	0.0173763	167	1.01375	0.16699	0.0148766	129	1.004	0.171003	0.0146634	136	0.96649	0.220549	0.0158755	202	1.00509	0.292572	0.0224393	173	DNA methylase HsdM, putative
VC1770		1.01615	0.220895	0.0213548	107	1.03528	0.233941	0.0207589	127	1.01688	0.168001	0.0145131	136	1.00473	0.160556	0.0135212	143	0.992608	0.206973	0.0156457	179	0.980656	0.253446	0.0197908	167	hypothetical protein
VC1771		1.02119	0.222648	0.0153642	211	1.03769	0.139733	0.00830624	284	1.01159	0.13519	0.0102783	175	1.01824	0.109334	0.00765491	205	1.00928	0.187165	0.0105289	326	1.00195	0.308495	0.0199133	244	hypothetical protein
VC1772		1.04213	0.228328	0.0243399	88	1.02182	0.312576	0.0322397	94	1.02448	0.118875	0.0111828	114	1.03348	0.0847736	0.00811984	110	0.928786	0.254264	0.0226516	127	0.971359	0.26207	0.0214696	151	hypothetical protein
VC1773		1.02928	0.212359	0.0175151	148	1.03691	0.167795	0.0126122	178	1.02475	0.149702	0.0127899	139	1.02487	0.129566	0.010579	151	0.957934	0.220079	0.0147707	227	0.966243	0.279806	0.0201933	193	hypothetical protein
VC1774		1.05604	0.121716	0.0103239	139	1.03294	0.167165	0.0136037	151	0.992745	0.19545	0.0158012	154	0.998864	0.176714	0.0144286	152	0.961889	0.207383	0.0152471	190	0.97986	0.272384	0.0189779	211	hypothetical protein
VC1775		0.818086	0.37124	0.0791487	22	0.833232	0.326216	0.0605767	29	0.767548	0.417709	0.098455	18	0.673919	0.443415	0.096761	21	0.719807	0.448614	0.0819053	30	0.968133	0.351103	0.0877757	16	hypothetical protein
VC1776		0.980725	0.286972	0.0448175	41	1.06604	0.206241	0.0314514	43	0.99111	0.193029	0.0270295	51	0.935973	0.279884	0.038813	53	0.930941	0.35793	0.0478304	56	1.0061	0.21773	0.028346	59	N-acetylneuraminate lyase, putative
VC1777		1.05452	0.133255	0.018304	53	1.03273	0.166404	0.0193441	74	0.901755	0.394633	0.0558095	51	0.970957	0.204336	0.025542	64	0.976036	0.234472	0.0233308	104	0.948009	0.345328	0.0438568	62	hypothetical protein
VC1778		0.958642	0.269127	0.0475753	32	1.0188	0.281935	0.0411245	47	1.0372	0.120159	0.0250549	23	0.989826	0.105133	0.0188825	31	0.963002	0.283571	0.0357266	63	0.935881	0.386524	0.059642	42	hypothetical protein
VC1779		1.01052	0.147079	0.0200149	54	1.01977	0.161114	0.0191207	71	1.00551	0.152662	0.0178678	75	0.97748	0.212837	0.0247418	74	0.986803	0.216026	0.0211831	106	0.935826	0.365367	0.0380921	93	C4-dicarboxylate-binding periplasmic protein
VC1780		ND				ND				ND				ND				ND				ND				hypothetical protein	Essential
VC1781		0.912154	0.278009	0.0802544	12	0.846424	0.364193	0.0883299	17	0.584279	0.424491	0.173298	6	0.606093	0.391451	0.147954	7	0.765894	0.47641	0.112291	18	ND			3	N-acetylmannosamine-6-phosphate 2-epimerase
VC1782		1.03275	0.063104	0.00973716	42	1.04131	0.108555	0.0136767	63	0.965793	0.261734	0.03665	52	0.989192	0.141903	0.0186328	59	0.941565	0.249155	0.0254293	98	0.992915	0.331964	0.0393969	71	N-acetylmannosamine kinase
VC1783		0.987036	0.229915	0.0318835	52	1.01346	0.214758	0.0268448	64	0.992595	0.190819	0.0254993	56	0.990564	0.205745	0.0274938	56	0.990022	0.229493	0.0263247	76	0.912216	0.32063	0.0380518	72	N-acetylglucosamine-6-phosphate deacetylase
VC1784		1.036	0.139579	0.0120578	134	1.04053	0.12842	0.0094931	183	1.00966	0.20272	0.0175123	136	1.00887	0.150631	0.0121778	156	0.988019	0.199258	0.0131387	240	0.954589	0.298056	0.0213442	199	neuraminidase
VC1785		0.985399	0.297923	0.0898272	11	1.0424	0.0459658	0.0111483	17	1.01467	0.394978	0.139646	8	0.952307	0.323955	0.0935179	12	0.817619	0.368103	0.0736205	25	0.973997	0.343319	0.103515	11	transcriptional regulator
VC1786		1.06026	0.0966898	0.0201612	23	1.08917	0.274163	0.0470186	34	1.04302	0.166639	0.0326807	26	0.979035	0.209858	0.0383147	30	0.970222	0.295252	0.0409441	52	0.971006	0.290368	0.0419109	48	DNA repair protein RadC, putative
VC1787		1.2364	0.231757	0.103645	5	1.21825	0.0964089	0.0431154	5	0.624115	0.502782	0.224851	5	0.546305	0.479024	0.181054	7	1.00782	0.138696	0.0620266	5	1.0973	0.179323	0.0732084	6	hypothetical protein
VC1788		0.986647	0.234813	0.0278671	71	1.03438	0.121627	0.0128206	90	0.995199	0.173709	0.0218853	64	0.991452	0.177263	0.02134	69	0.93998	0.298615	0.0286021	112	0.971405	0.271867	0.0281913	93	hypothetical protein
VC1789		1.02848	0.130464	0.010688	149	1.02483	0.121872	0.0088415	190	1.02688	0.104013	0.00891907	139	1.00369	0.100146	0.00868376	134	1.00078	0.146334	0.00936809	247	0.995122	0.181677	0.0135039	184	transposase OrfAB, subunit B
VC1790		1.04317	0.114786	0.0134346	73	1.02093	0.0945815	0.00975534	94	0.98193	0.186333	0.0221136	72	0.965119	0.207679	0.024307	74	1.00555	0.169474	0.0150383	127	0.957378	0.263997	0.0278278	91	transposase OrfAB, subunit A
VC1791		1.06787	0.0904116	0.0118716	58	1.05222	0.100189	0.0119748	70	1.00345	0.10982	0.0126809	75	0.985894	0.164521	0.0193889	72	0.991311	0.242205	0.0251154	93	0.93382	0.335044	0.0359205	87	hypothetical protein
VC1792		1.04938	0.152617	0.0341262	20	1.0781	0.122007	0.0249046	24	1.01761	0.153754	0.0320598	23	0.988807	0.100652	0.0219641	21	0.952243	0.162281	0.0270469	36	1.01057	0.213622	0.0411115	27	hypothetical protein
VC1793		0.942092	0.306299	0.0533198	33	0.990413	0.283057	0.0485438	34	1.02661	0.100609	0.0201219	25	0.96165	0.235514	0.0491081	23	0.884415	0.379132	0.0623289	37	0.990071	0.169911	0.0295777	33	hypothetical protein
VC1794		0.971202	0.275967	0.0512457	29	1.02936	0.107446	0.0169888	40	1.02774	0.0920304	0.0191897	23	0.983181	0.12958	0.0244883	28	0.997733	0.247072	0.0349412	50	0.940987	0.368384	0.0613974	36	hypothetical protein
VC1795		1.10766	0.13371	0.0445699	9	1.06885	0.0980454	0.0271929	13	0.912477	0.401555	0.151774	7	0.936862	0.308682	0.0976138	10	0.804787	0.3999	0.0969899	17	0.94203	0.341533	0.113844	9	transcriptional regulator, putative
VC1796		0.934861	0.0707006	0.0316183	5	0.98556	0.0451772	0.0159725	8	0.560171	0.460319	0.205861	5	1.03639	0.0624098	0.0254787	6	1.02303	0.284723	0.0690555	17	ND			3	middle operon regulator-related protein
VC1797		1.04047	0.18661	0.0266586	49	1.07771	0.123534	0.0160828	59	0.997772	0.175165	0.0238369	54	1.0008	0.181671	0.0244965	55	1.00057	0.196838	0.0233604	71	0.948891	0.341744	0.0405576	71	hypothetical protein
VC1798		1.00711	0.176408	0.0186992	89	1.02376	0.183739	0.0181043	103	0.977339	0.225971	0.0234321	95	0.972929	0.221278	0.0227027	95	0.962694	0.252236	0.0223823	130	0.95104	0.293407	0.0260357	129	eha protein
VC1799		1.02585	0.153481	0.014129	118	1.03246	0.146179	0.0116664	157	1.00933	0.164553	0.0135721	151	1.00391	0.152374	0.0121608	159	0.957266	0.244768	0.0167712	221	0.972852	0.290503	0.0212437	194	hypothetical protein
VC1800		0.980026	0.261622	0.0352772	55	1.02221	0.157872	0.0203812	60	1.02621	0.108631	0.0140242	60	0.983662	0.120867	0.0158706	58	1.03272	0.198099	0.0224302	78	1.01377	0.184994	0.021082	77	hypothetical protein
VC1801		1.02457	0.0736222	0.0184056	16	1.052	0.142548	0.0335988	18	0.925122	0.267789	0.0570929	22	0.948314	0.295942	0.0617081	23	0.862964	0.330897	0.0636811	27	0.978384	0.186954	0.0407968	21	hypothetical protein
VC1802		1.05156	0.113398	0.0292794	15	1.08109	0.268223	0.0743917	13	0.962403	0.253754	0.0441729	33	0.980703	0.213173	0.0402859	28	0.951019	0.343128	0.0715471	23	0.893162	0.28568	0.0489937	34	hypothetical protein
VC1803		ND				ND				ND				ND				ND				ND				hypothetical protein	Essential
VC1804		0.959098	0.287974	0.0439155	43	1.00098	0.224331	0.0379189	35	0.981093	0.133573	0.0196942	46	0.980854	0.202066	0.0319495	40	0.989807	0.249899	0.035341	50	0.954137	0.350203	0.0441215	63	hypothetical protein
VC1805		1.002	0.165143	0.0497924	11	1.02117	0.0442457	0.0118252	14	0.945972	0.22885	0.0611628	14	0.933483	0.284166	0.0759466	14	0.865973	0.326277	0.0729578	20	0.920577	0.298863	0.0798744	14	hypothetical protein
VC1806		1.00377	0.23247	0.0300117	60	1.03681	0.0983845	0.0103706	90	0.824458	0.387527	0.0590973	44	0.975386	0.225006	0.0285758	62	0.967236	0.233545	0.0223696	113	0.922187	0.353037	0.0452018	61	hypothetical protein
VC1807		1.00427	0.131884	0.0143048	85	1.02918	0.144088	0.0138648	108	0.922368	0.295244	0.0352884	71	0.990078	0.154856	0.0172062	81	0.962847	0.229184	0.0199479	135	1.01131	0.233431	0.0251715	86
VC1808		1.01282	0.181251	0.0143741	160	1.02151	0.173149	0.0126282	188	1.0064	0.179667	0.0140296	168	1.00428	0.155036	0.011997	168	0.984561	0.209114	0.0131991	258	0.960946	0.284512	0.0192696	223	hypothetical protein
VC1809		0.979911	0.254397	0.0371076	47	0.950857	0.224223	0.0282495	63	0.985577	0.186749	0.0251812	56	0.939337	0.299539	0.0403898	55	0.94891	0.328035	0.0366754	80	0.876406	0.428258	0.0548328	61	transcriptional regulator, putative
VC1810		0.955017	0.295716	0.0985721	9	1.09934	0.275944	0.0872612	10	0.847427	0.358533	0.126761	8	0.682248	0.391474	0.130491	9	0.946486	0.205615	0.0619954	11	0.817665	0.498168	0.203376	6	hypothetical protein
VC1811		1.03447	0.247735	0.0505687	24	0.973988	0.206755	0.0365494	32	0.826201	0.387625	0.0745985	27	0.84879	0.372488	0.0680066	30	0.930944	0.284124	0.046091	38	0.931084	0.35369	0.0668411	28	hypothetical protein
VC1812		1.0146	0.104738	0.0228558	21	1.0116	0.0482393	0.00946051	26	1.04499	0.0787284	0.0176042	20	0.952779	0.21921	0.0467358	22	0.999753	0.152084	0.0257068	35	1.01363	0.155255	0.0270265	33	hypothetical protein
VC1813		ND			2	ND			4	ND			2	ND			3	0.8406	0.277305	0.113209	6	ND			1	hypothetical protein
VC1814		1.00199	0.192106	0.0250101	59	1.02012	0.179415	0.021599	69	0.993295	0.208158	0.0258188	66	0.939763	0.29707	0.0362928	67	0.925718	0.275062	0.0300118	84	0.929904	0.350806	0.0422321	69	deoxyribodipyrimidine photolyase
VC1815		0.98369	0.225267	0.0335808	45	1.01164	0.161635	0.0210431	59	0.983969	0.278283	0.0484429	33	0.963039	0.205795	0.0317549	42	0.942736	0.232199	0.0292543	63	0.946513	0.251395	0.0387911	42	C factor cell-cell signaling protein
VC1816		0.877896	0.318229	0.106076	9	0.965074	0.135274	0.0361534	14	0.787103	0.427134	0.123303	12	0.974166	0.132754	0.0368195	13	1.02478	0.212233	0.0463131	21	1.01367	0.113984	0.0284959	16	hypothetical protein
VC1817		1.03309	0.138877	0.0148891	87	1.00962	0.171582	0.0153467	125	0.946466	0.276974	0.0282686	100	0.984114	0.154771	0.0150327	107	0.971236	0.254654	0.019765	169	0.971292	0.278096	0.0258205	118	sigma-54 dependent transcriptional regulator
VC1818		1.03725	0.0569407	0.0124255	21	1.03272	0.069167	0.0124228	31	1.0233	0.0875341	0.0218835	16	0.988591	0.0546549	0.0125387	19	0.919184	0.277375	0.0444155	39	0.930171	0.377737	0.0740802	26	hypothetical protein
VC1819		0.99202	0.193772	0.019093	103	0.989613	0.217056	0.0190371	130	0.999749	0.128387	0.0129034	101	0.976652	0.198851	0.0183837	117	0.919682	0.303513	0.0240701	162	0.957655	0.310281	0.0277524	127	aldehyde dehydrogenase
VC1820		1.02086	0.167001	0.0219283	58	1.02415	0.169834	0.0201555	71	0.975681	0.186037	0.0257986	52	0.990557	0.173948	0.0232448	56	0.937098	0.27238	0.0297191	84	0.968029	0.282911	0.0328878	74	PTS system, fructose-specific IIA component
VC1821		1.00266	0.21135	0.0231987	83	0.979858	0.247061	0.0236641	109	1.01119	0.207186	0.0219616	89	0.997158	0.151759	0.0155702	95	0.99403	0.203076	0.017163	141	0.955384	0.338781	0.0329053	106	PTS system, fructose-specific IIBC component
VC1822		0.993393	0.275341	0.0296908	86	1.0056	0.212394	0.020827	104	1.018	0.158409	0.0178223	79	1.02969	0.0928772	0.00995748	87	0.919446	0.318629	0.0299741	117	0.994591	0.268152	0.0242774	123	PTS system, fructose-specific IIABC component
VC1823		1.0601	0.0995932	0.0234744	18	1.05036	0.12039	0.0240781	25	0.926894	0.294021	0.0536807	30	0.939766	0.25664	0.0446752	33	0.922062	0.297354	0.0476148	39	0.941814	0.236725	0.0412085	33	PTS system, fructose-specific IIB component
VC1824		0.971116	0.19965	0.0342397	34	0.967239	0.191586	0.0292166	43	0.981107	0.189048	0.0267354	50	1.03203	0.147538	0.0206594	51	0.759151	0.427507	0.055191	60	0.898458	0.307092	0.0406754	57	PTS system, nitrogen regulatory IIA component, putative
VC1825		1.05205	0.0821385	0.010188	65	1.03042	0.154746	0.0183649	71	1.00392	0.204373	0.0244272	71	1.0018	0.198996	0.0236165	71	0.999632	0.223245	0.0226671	97	0.962586	0.321424	0.0328052	96	transcriptional regulator
VC1826		1.0321	0.178534	0.0171795	108	1.01666	0.147685	0.0131049	127	1.0032	0.154697	0.013516	134	0.95701	0.209493	0.0178982	138	1.00711	0.201091	0.0157992	164	0.963015	0.266829	0.0205863	171	PTS system, fructose-specific IIABC component
VC1827		1.00652	0.207591	0.0293578	50	1.02402	0.15472	0.0190448	66	0.97258	0.24126	0.0396629	37	0.935831	0.267423	0.0398651	45	0.958005	0.255794	0.0303572	72	0.953056	0.329645	0.0480836	47	mannose-6-phosphate isomerase
VC1828		1.01811	0.10227	0.0340899	9	0.972003	0.315575	0.0997936	10	ND			4	0.938585	0.131294	0.0536004	6	0.829703	0.467803	0.129745	13	0.602998	0.532512	0.201271	7	hypothetical protein
VC1829		ND				ND				ND				ND				ND				ND				hypothetical protein	Essential
VC1830		ND			3	ND			4	ND				ND			1	ND			3	ND			1	hypothetical protein
VC1831		0.900898	0.323076	0.0318336	103	0.992681	0.253873	0.0227985	124	0.990865	0.173934	0.0163623	115	0.918214	0.292064	0.0275974	113	0.923638	0.307857	0.0243383	166	0.902329	0.375577	0.0316293	143	sensor histidine kinase
VC1832		1.01354	0.123815	0.0284051	19	0.98203	0.251247	0.0548266	21	0.971536	0.208928	0.0375246	31	0.943719	0.268933	0.0483017	31	0.932871	0.324794	0.0636973	26	0.989795	0.20991	0.0336125	39	hypothetical protein
VC1833		0.948742	0.269221	0.0461709	34	0.981013	0.207376	0.0336408	38	0.953101	0.265091	0.0414003	41	0.838741	0.391122	0.0618419	40	0.903056	0.322233	0.0475107	46	0.945497	0.302848	0.0446524	46	quinolinate synthetase
VC1834		1.05619	0.070815	0.023605	9	1.07048	0.090616	0.0273218	11	0.92041	0.267705	0.0742481	13	0.851992	0.269985	0.0748805	13	0.537351	0.34614	0.0773992	20	0.48499	0.430776	0.0988267	19	hypothetical protein
VC1835		0.646215	0.446211	0.105173	18	0.73296	0.406036	0.0886044	21	0	X	X	7	0.100621	0.306051	0.0817956	14	0.190269	0.419053	0.0961373	19	ND				peptidoglycan-associated lipoprotein
VC1836	tolB	0.813275	0.347963	0.0929971	14	0.944147	0.241833	0.0554803	19	0.0447578	0.138416	0.0399572	12	0.0373836	0.135492	0.0349838	15	0	X	X	19	ND				translocation protein TolB
VC1837		0.541222	0.378816	0.0947041	16	0.821744	0.355265	0.0775251	21	0	X	X	8	0	X	X	8	0.0320577	0.156174	0.0332964	22	ND				tolA protein
VC1838		0.607763	0.253589	0.0845296	9	0.713093	0.350295	0.105618	11	ND			4	0	X	X	5	0.216845	0.295938	0.111854	7	ND				tolR membrane protein
VC1839		0.84566	0.253292	0.0844307	9	0.965388	0.151118	0.0419127	13	0	X	X	5	0	X	X	6	0	X	X	21	ND				tolQ protein
VC1840		0.821514	0.356472	0.0712943	25	1.01766	0.200073	0.0343123	34	0.513041	0.493263	0.0949285	27	0.404952	0.492795	0.0899716	30	0.314595	0.446764	0.0651672	47	0.763636	0.405419	0.128205	10	hypothetical protein
VC1841		0.946169	0.24792	0.0601294	17	0.968873	0.259688	0.0629836	17	0.946628	0.256647	0.062246	17	0.988359	0.0690626	0.0162782	18	0.848713	0.399318	0.0871382	21	1.06695	0.150452	0.0300903	25	hypothetical protein
VC1842		ND			1	ND			1	ND			2	ND			2	ND			2	ND				hypothetical protein
VC1843		0.557841	0.412329	0.13039	10	0.371896	0.444253	0.107747	17	ND			2	ND			2	0	X	X	7	ND				cytochrome d ubiquinol oxidase, subunit II
VC1844		0.170133	0.310148	0.138702	5	0.184964	0.324873	0.11486	8	ND				ND				ND			2	ND				cytochrome d ubiquinol oxidase, subunit I
VC1845	ruvB	0.69164	0.352656	0.0623413	32	0.812337	0.295624	0.0450822	43	0.272247	0.373947	0.0719661	27	0.100028	0.283503	0.053577	28	0.399628	0.460394	0.0632399	53	ND			1	Holliday junction DNA helicase B
VC1846	ruvA	0.754925	0.47288	0.126383	14	0.781352	0.364469	0.0859062	18	0.543008	0.397251	0.132417	9	0.138133	0.313017	0.0903604	12	0.435261	0.498156	0.128623	15	ND			1	Holliday junction DNA helicase motor protein
VC1847	ruvC	0.770965	0.366564	0.0799908	21	0.727974	0.425669	0.08192	27	0.128344	0.26507	0.0799215	11	0.0402594	0.133405	0.0385107	12	0.459995	0.491594	0.0929025	28	ND			2	Holliday junction resolvase
VC1848	cysS	ND				ND				ND				ND				ND				ND				cysteinyl-tRNA synthetase	Essential
VC1849		1.02639	0.23873	0.0662118	13	0.952764	0.21083	0.0511338	17	0.765433	0.41777	0.139257	9	0.517082	0.506609	0.152748	11	0.749924	0.487899	0.109098	20	0.496573	0.443654	0.167685	7	peptidyl-prolyl cis-trans isomerase B
VC1850		ND				ND				ND				ND				ND				ND				UDP-2,3-diacylglucosamine hydrolase	Essential
VC1851		1.03142	0.113768	0.0132252	74	1.0108	0.145401	0.015679	86	0.959751	0.2077	0.0238248	78	1.01168	0.175093	0.0199537	77	0.941167	0.286026	0.0279133	106	0.939643	0.220596	0.021736	103	hypothetical protein
VC1852		1.02258	0.0983714	0.0219965	20	0.990629	0.250308	0.0574245	19	0.940027	0.224664	0.0468457	23	0.962605	0.229054	0.051218	20	0.951339	0.308059	0.0592859	27	1.05765	0.299714	0.0599427	25	hypothetical protein
VC1853		0.920912	0.337304	0.0688519	24	1.01425	0.25991	0.0491184	28	0.909536	0.290195	0.056912	26	0.949882	0.221244	0.0442489	25	1.04464	0.202225	0.0352028	33	0.964898	0.24485	0.0439763	31	hypothetical protein
VC1854		0.985076	0.276426	0.0448423	38	1.02277	0.267647	0.0371159	52	0.986826	0.248842	0.0462088	29	1.01452	0.167155	0.0282544	35	0.784287	0.370945	0.0463681	64	0.997994	0.315856	0.0465705	46	porin, putative
VC1855	dinG	1.00417	0.20563	0.0229902	80	1.03996	0.190008	0.0185429	105	0.952131	0.253906	0.0261884	96	0.950165	0.27694	0.0274211	103	0.980614	0.246521	0.0206876	145	0.981314	0.284174	0.0267328	114	ATP-dependent DNA helicase DinG
VC1856		1.03233	0.141116	0.0257641	30	0.996777	0.176829	0.0272854	42	0.872315	0.394427	0.0860709	22	0.934972	0.282926	0.053468	28	0.923902	0.36018	0.0494745	53	0.939045	0.398859	0.0891875	20	hypothetical protein
VC1857		1.08245	0.249433	0.0644033	15	1.0094	0.126132	0.0305915	17	0.918761	0.273666	0.0759012	13	1.01558	0.0830395	0.023031	13	0.965924	0.176153	0.0427234	17	1.07337	0.21647	0.0525016	17	primosomal replication protein N``
VC1858		1.12469	0.161559	0.0722514	5	1.0228	0.0531435	0.0187891	8	ND			2	ND			4	1.01064	0.131624	0.0438747	9	ND			4	hypothetical protein
VC1859		0.961413	0.266154	0.0299447	79	0.970036	0.196146	0.0194213	102	0.951148	0.288121	0.0316254	84	0.947768	0.285083	0.0298848	91	1.02459	0.200267	0.0179124	127	0.952841	0.35404	0.0339109	109	methyl-accepting chemotaxis protein
VC1860		0.95045	0.217783	0.045411	23	1.01057	0.126232	0.0207524	37	0.942854	0.253911	0.0507822	25	0.957356	0.199088	0.0369697	29	0.951706	0.312497	0.0446425	49	0.975179	0.223097	0.0366769	37	exonuclease III
VC1861		0.950798	0.212256	0.0358779	35	1.00627	0.107596	0.0147795	53	1.01032	0.157914	0.0266924	35	0.938339	0.230671	0.0340105	46	0.925026	0.29413	0.0362049	66	0.86644	0.361938	0.0501918	52	amino acid ABC transporter, permease protein
VC1862		0.987028	0.254851	0.0473247	29	1.01052	0.164227	0.0273712	36	0.907104	0.360573	0.0721146	25	0.964258	0.205298	0.0381228	29	0.89917	0.268712	0.0396194	46	0.96812	0.270637	0.0457461	35	amino acid ABC transporter, permease protein
VC1863		1.00021	0.201258	0.0293565	47	1.03356	0.177709	0.0223892	63	1.01983	0.15113	0.0211625	52	1.00334	0.168809	0.0221658	58	0.846547	0.341894	0.0382249	81	0.925389	0.325965	0.0378927	74	amino acid ABC transporter, periplasmic amino acid-binding protein
VC1864		0.993194	0.184262	0.0280997	43	1.03076	0.112544	0.0173659	42	0.9998	0.200362	0.0289198	48	1.00606	0.184385	0.0268953	47	0.88431	0.292131	0.039391	55	0.878627	0.268846	0.0323653	69	amino acid ABC transporter, ATP-binding protein
VC1865		0.969738	0.262044	0.0237243	122	0.980851	0.283257	0.0232053	149	0.980414	0.197093	0.0167777	141	0.997434	0.165605	0.0138004	145	1.00207	0.193607	0.0145524	183	0.993166	0.291937	0.0219433	179	hypothetical protein
VC1866		0.902543	0.301532	0.024955	148	1.01119	0.1787	0.012636	201	0.953949	0.17152	0.0146539	141	0.885698	0.268528	0.0209049	168	0.899562	0.26651	0.0171674	252	0.974143	0.313134	0.0236707	179	formate acetyltransferase
VC1867		1.00419	0.111582	0.0157801	50	1.02136	0.104871	0.0124459	71	0.975207	0.21711	0.0339069	42	1.00188	0.069355	0.00943802	54	0.946811	0.245543	0.0257399	93	1.0681	0.249195	0.032171	60	hypothetical protein
VC1868		0.971976	0.252304	0.0270498	87	0.993039	0.222837	0.021344	109	0.986575	0.194901	0.0208956	88	0.96149	0.236872	0.0244314	94	0.925494	0.31633	0.0292448	121	0.976448	0.219581	0.0205656	116	methyl-accepting chemotaxis protein
VC1869	pflA	0.839638	0.341033	0.107844	10	1.04767	0.0731851	0.01775	17	0.828271	0.380677	0.114778	11	0.876933	0.246289	0.0635914	15	0.881138	0.282168	0.0588361	23	0.796974	0.464651	0.128871	13	pyruvate formate lyase-activating enzyme 1
VC1870		0.981349	0.147995	0.0274819	29	0.95015	0.352555	0.0587591	36	0.853446	0.352836	0.0705672	25	0.927142	0.289336	0.0567435	26	0.881265	0.363879	0.059029	38	0.845193	0.350822	0.0675158	27	hypothetical protein
VC1871		0.954344	0.296414	0.0592828	25	0.941211	0.288879	0.0468623	38	0.840967	0.400119	0.10003	16	0.989707	0.162752	0.0339361	23	0.913554	0.316918	0.045274	49	1.06567	0.389791	0.0894243	19	hypothetical protein
VC1872		0.974925	0.233764	0.0229225	104	1.01439	0.210802	0.018348	132	0.975309	0.193548	0.0175952	123	0.995967	0.134605	0.0120879	124	0.880629	0.318247	0.0260718	153	0.955442	0.287626	0.0231027	157	hypothetical protein
VC1873		1.00315	0.203014	0.0237609	73	0.999938	0.154828	0.0179984	74	1.0284	0.13253	0.0137428	93	0.98103	0.232724	0.0246687	90	0.859006	0.384196	0.0388096	99	0.891988	0.278797	0.0274707	105	hypothetical protein
VC1874		1.02918	0.137659	0.0155868	78	1.03174	0.189318	0.0185642	104	0.986892	0.19338	0.0227901	73	0.935147	0.284976	0.0300391	90	0.870767	0.338128	0.0303648	128	0.940919	0.291138	0.0294093	99	hypothetical protein
VC1875		ND			2	ND			4	ND			2	ND			3	0.903745	0.198265	0.0809414	6	1.01486	0.113741	0.0508666	5	3-deoxy-manno-octulosonate cytidylyltransferase
VC1876		ND				ND				ND				ND				ND				ND				hypothetical protein	Essential
VC1877	lpxK	ND				ND				ND			1	ND				ND				ND				tetraacyldisaccharide 4'-kinase	Essential
VC1878		ND				ND				ND				ND				ND				ND				lipid transporter ATP-binding/permease protein	Essential
VC1879		0.963706	0.257624	0.0241287	114	0.996909	0.208698	0.016763	155	1.02003	0.170862	0.016291	113	0.983765	0.204176	0.0184852	124	0.976721	0.264249	0.0194807	193	0.974223	0.311597	0.0247113	160	Rec2-related protein
VC1880		0.922483	0.32884	0.0949279	12	0.980306	0.306398	0.0791116	15	0.833168	0.263887	0.064002	17	0.523398	0.423711	0.0947447	20	0.584397	0.531112	0.106222	25	0.565549	0.444906	0.181632	6	hypothetical protein
VC1881		ND				ND				ND				ND				ND				ND				hypothetical protein	Essential
VC1882		ND				ND				ND				ND				ND				ND				outer membrane-specific lipoprotein transporter subunit LolE	Essential
VC1883		ND				ND				ND				ND				ND				ND				ABC transporter, ATP-binding protein	Essential
VC1884		ND				ND				ND				ND				ND				ND				hypothetical protein	Essential
VC1885		1.00259	0.355326	0.0861793	17	1.14903	0.433489	0.102174	18	0.869737	0.299828	0.0727189	17	0.732192	0.472575	0.111387	18	0.957309	0.391708	0.0835124	22	0.959294	0.360606	0.0827286	19	hypothetical protein
VC1886		1.01409	0.13328	0.0114709	135	1.02057	0.15433	0.0123169	157	1.02671	0.125638	0.0105064	146	0.989497	0.186513	0.0153833	148	0.985675	0.236259	0.0163035	215	1.01772	0.266825	0.0191077	197	transcription-repair coupling factor
VC1887		0.863735	0.406954	0.09592	18	0.94947	0.16071	0.0293414	30	0.39826	0.453738	0.136807	11	0.414494	0.457119	0.118028	15	0.0702617	0.236306	0.0405261	34	0.592007	0.496669	0.187723	7	hypothetical protein
VC1888		0.999943	0.220434	0.0212112	108	1.00744	0.232854	0.0205816	128	0.988009	0.190971	0.018817	104	0.977714	0.196152	0.018788	110	0.98656	0.249944	0.020615	151	0.969528	0.296011	0.0251981	140	hemolysin-related protein
VC1889		0.981138	0.219278	0.0503058	19	1.06393	0.126358	0.0257927	24	0.964734	0.192289	0.040095	23	1.00729	0.0750667	0.0153229	24	0.972899	0.131364	0.0235937	31	0.911451	0.275673	0.0520973	28	ribosomal-protein-serine acetyltransferase, putative
VC1890		0.928269	0.227542	0.0355361	41	0.916735	0.202284	0.02569	62	0.807115	0.434513	0.0836221	28	0.771694	0.420106	0.0672707	39	0.682571	0.474193	0.0517387	87	0.616142	0.473601	0.0812219	34	NADH dehydrogenase
VC1891		1.00716	0.0996345	0.0376583	7	0.931849	0.313361	0.0990933	10	0.783334	0.35162	0.106018	11	0.785786	0.388349	0.112107	12	0.704516	0.448129	0.129364	12	0.672944	0.423132	0.1496	8	hypothetical protein
VC1892		1.0906	0.136092	0.036372	14	1.04319	0.141025	0.0364126	15	1.04721	0.176868	0.0533276	11	1.05196	0.10408	0.032913	10	0.98859	0.292766	0.0690057	18	0.93621	0.345978	0.095957	13	hypothetical protein
VC1893		0.996064	0.127108	0.0221266	33	1.0255	0.119444	0.016892	50	0.92576	0.303237	0.0491915	38	0.815063	0.363046	0.0553641	43	0.788972	0.398303	0.0505845	62	0.923881	0.344251	0.0486845	50	hypothetical protein
VC1894		0.92655	0.0413506	0.0184926	5	1.02971	0.120525	0.040175	9	1.04142	0.159179	0.060164	7	0.907856	0.111996	0.0395966	8	0.811022	0.385259	0.11616	11	0.622177	0.479418	0.159806	9	hypothetical protein
VC1895		1.03219	0.140153	0.0388714	13	1.01402	0.0827444	0.0180563	21	0.737344	0.371178	0.111915	11	0.764373	0.391045	0.100967	15	0.792343	0.36551	0.0678736	29	0.914063	0.44951	0.149837	9	hypothetical protein
VC1896		1.01187	0.188497	0.0179724	110	1.01596	0.19381	0.0168055	133	0.968066	0.190752	0.0199963	91	0.966293	0.249392	0.0248155	101	1.02915	0.176264	0.0146887	149	0.949146	0.316285	0.0280657	128	hypothetical protein
VC1897		1.01885	0.110907	0.036969	9	0.920229	0.297526	0.082519	13	0.810842	0.388041	0.158417	6	0.888786	0.354513	0.125339	8	0.850199	0.294618	0.0817124	13	0.901148	0.276679	0.104575	7	Hit family protein
VC1898		0.986177	0.201897	0.0204996	97	1.01882	0.101522	0.00904432	126	0.962588	0.251717	0.025558	99	0.979317	0.20902	0.0199293	112	0.979372	0.253648	0.0198066	170	0.95181	0.315348	0.027552	132	methyl-accepting chemotaxis protein
VC1899		0.910468	0.345658	0.0509645	46	0.987258	0.293771	0.0403525	53	0.979427	0.225586	0.0312831	52	1.01631	0.124289	0.017404	51	1.03752	0.176541	0.0220677	64	0.987548	0.298239	0.0359038	69	hypothetical protein
VC1900		0.0610295	0.139176	0.049206	8	0.108463	0.248266	0.0716683	12	ND			3	ND			4	ND				ND				fatty acid metabolism regulator
VC1901	nhaB	0.983665	0.2081	0.0252359	68	1.00052	0.199024	0.0221138	81	1.0023	0.182826	0.019601	88	1.00603	0.213434	0.022014	95	0.888123	0.332593	0.0323043	108	0.988759	0.271009	0.0256079	113	sodium/proton antiporter
VC1902		1.03802	0.0826509	0.016871	24	1.02521	0.121186	0.0204842	35	0.26942	0.370242	0.0654502	33	0.0681888	0.213073	0.0360159	35	0.745022	0.397747	0.0562499	50	ND			3	disulfide bond formation protein B
VC1903		0.23864	0.417122	0.0834244	25	0.336278	0.438024	0.0762501	33	0.234274	0.416555	0.0816931	26	0.0913827	0.26168	0.052336	25	0.362781	0.476175	0.127263	14	1.03276	0.117567	0.0525776	5	cell division protein FtsK, putative
VC1904		ND				ND				ND				ND				ND				ND				leucine-responsive transcriptional regulator	Essential
VC1905		0.966934	0.256506	0.0336809	58	0.94309	0.21377	0.0253698	71	0.93145	0.267189	0.0377862	50	0.939885	0.251801	0.0345876	53	0.828114	0.360214	0.0415939	76	0.994456	0.284991	0.0343089	69	alanine dehydrogenase
VC1906		0.964455	0.261432	0.0312471	70	1.02542	0.155187	0.0166378	87	0.997557	0.169332	0.0216807	62	0.998941	0.154142	0.0192677	64	0.923458	0.309982	0.0308444	101	0.957347	0.24486	0.0248618	98	hypothetical protein
VC1907	cysB	0.757664	0.346931	0.141634	6	0.624711	0.454376	0.151459	9	ND			2	ND			3	0.468493	0.485803	0.171757	8	ND			2	transcriptional regulator CysB
VC1908		ND			1	ND			1	ND			4	ND			4	ND			2	ND			4	hypothetical protein
VC1909		1.04364	0.0707919	0.0235973	9	0.972378	0.0720241	0.022776	10	0.661264	0.37636	0.153648	6	1.03238	0.152704	0.0577168	7	0.800431	0.377827	0.154247	6	0.886662	0.486408	0.217528	5	hypothetical protein
VC1910		0.939911	0.291484	0.0841442	12	1.02822	0.126562	0.0316406	16	1.01498	0.0884731	0.0193064	21	1.03453	0.0959887	0.0214637	20	0.932162	0.229934	0.0459867	25	1.02491	0.261588	0.0533964	24	tRNA-(MS[2]IO[6]A)-hydroxylase
VC1911		0.968178	0.095023	0.0237557	16	0.987936	0.110813	0.0254223	19	0.300743	0.363913	0.0882618	17	0.217677	0.360586	0.0786864	21	0.993798	0.164515	0.0335815	24	ND			4	orotidine 5'-phosphate decarboxylase
VC1912		ND				ND				ND				ND				ND				ND				hypothetical protein	Essential
VC1913		ND				ND				ND				ND				ND				ND				hypothetical protein	Essential
VC1914	ihfB	0	X	X	5	0.39094	0.478224	0.14419	11	ND			2	ND			3	0	X	X	5	ND				integration host factor subunit beta
VC1915	rpsA	ND			2	ND			1	0.445646	0.360184	0.147045	6	0.350086	0.467975	0.19105	6	ND				ND				30S ribosomal protein S1
VC1916	cmk	ND				ND				ND				ND				ND				ND				cytidylate kinase	Essential
VC1917		0.818918	0.391688	0.130563	9	0.956543	0.241089	0.0668661	13	ND			4	0.94763	0.283514	0.115744	6	0.919958	0.245191	0.0680037	13	ND			4	hypothetical protein
VC1918		0.932435	0.292901	0.0288604	103	0.936349	0.309325	0.0273408	128	0.882366	0.267304	0.0304622	79	0.885514	0.279936	0.030727	83	0.861823	0.339249	0.0298692	134	0.651202	0.43144	0.0473567	83	peptidyl-prolyl cis-trans isomerse D
VC1919		ND			3	ND			4	ND				ND			1	0.997974	0.516749	0.210962	6	ND				DNA-binding protein HU-beta
VC1920		0.865245	0.337668	0.0395211	73	0.983142	0.272199	0.0300594	82	0.839332	0.274993	0.0331053	69	0.906315	0.237158	0.0285505	70	0.525444	0.462048	0.0487041	91	0.547005	0.408773	0.052338	61	ATP-dependent protease LA
VC1921	clpX	0.698816	0.494344	0.201815	6	0.965392	0.0910081	0.0321762	8	ND			1	ND			3	0.575599	0.511475	0.154216	11	ND			4	ATP-dependent protease ATP-binding subunit
VC1922	clpP	0.791563	0.279976	0.0844159	11	0.802193	0.299826	0.0727185	17	0	X	X	8	0.15183	0.329928	0.0952421	12	0.105889	0.292889	0.0690347	18	ND				ATP-dependent Clp protease proteolytic subunit
VC1923	tig	0.863641	0.239952	0.053655	20	0.958674	0.146127	0.0311543	22	0.755716	0.433174	0.0804385	29	0.69591	0.407845	0.0850415	23	0.422205	0.389113	0.0657721	35	0.863689	0.318039	0.0749625	18	trigger factor
VC1924		1.00728	0.221603	0.049552	20	1.07196	0.134596	0.0263964	26	0.970214	0.247808	0.0715361	12	1.04983	0.0805513	0.0207983	15	0.794121	0.309314	0.0584549	28	0.815097	0.371634	0.0959554	15	hypothetical protein
VC1925		1.01615	0.172278	0.0136198	162	0.986631	0.19902	0.0138329	208	0.95077	0.251103	0.0210721	147	0.98023	0.202081	0.0159759	163	0.963654	0.222592	0.0143983	247	0.94359	0.308037	0.0224064	193	C4-dicarboxylate transport sensor protein
VC1926		0.982386	0.207288	0.0302361	47	0.989782	0.164035	0.023927	47	0.9915	0.159152	0.0188878	72	0.971654	0.177595	0.0233194	59	0.970089	0.222697	0.0272067	67	0.955599	0.323634	0.0386817	70	C4-dicarboxylate transport transcriptional regulatory protein
VC1927		1.03324	0.12227	0.0186461	43	1.01354	0.189968	0.0266009	51	0.982058	0.161707	0.0222122	53	0.965798	0.189877	0.0263313	52	0.928611	0.30821	0.0373759	68	0.939397	0.340775	0.0410245	69	C4-dicarboxylate transport protein
VC1928		1.02139	0.107732	0.0162412	44	0.995059	0.113655	0.0146728	60	0.987247	0.182194	0.0364387	25	0.970426	0.241557	0.0408306	35	0.902419	0.282779	0.0356268	63	0.969961	0.366422	0.0572255	41	C4-dicarboxylate transport protein DctQ, putative
VC1929		1.02354	0.106113	0.0134763	62	1.00625	0.141723	0.0162567	76	1.00482	0.210393	0.0257036	68	0.977741	0.233062	0.0270929	74	0.939399	0.296773	0.0307739	93	0.975537	0.2543	0.0256882	98	C4-dicarboxylate-binding periplasmic protein
VC1930		ND				ND				ND				ND				ND				ND				hypothetical protein	Essential
VC1931		0.941504	0.327524	0.0330849	98	1.02176	0.162066	0.0150475	116	0.980388	0.248597	0.025918	93	0.994342	0.205317	0.0212904	94	0.97395	0.305869	0.0261321	142	0.931613	0.289154	0.0259668	125	hypothetical protein
VC1932		1.00433	0.221801	0.0592789	14	1.00896	0.230589	0.0559261	17	0.92107	0.304876	0.0919236	11	0.947197	0.303163	0.0875157	12	0.858489	0.358144	0.0821639	19	0.80882	0.39301	0.0901627	19	hypothetical protein
VC1933		1.00775	0.0794918	0.0212451	14	0.947719	0.270779	0.0656736	17	1.00402	0.123385	0.0283064	19	1.01624	0.185173	0.0414059	20	0.935361	0.401651	0.0772977	27	1.03554	0.21343	0.0396329	29	hypothetical protein
VC1934		1.03184	0.149513	0.0178702	70	1.04447	0.106417	0.011611	84	1.00237	0.15384	0.016307	90	1.01382	0.160673	0.0168431	91	1.00599	0.270721	0.0265464	104	1.00119	0.261429	0.0240665	119	GGDEF family protein
VC1935		0.941568	0.237622	0.042006	32	1.01249	0.160307	0.0250357	41	0.93159	0.33522	0.0633505	28	1.00432	0.209701	0.038286	30	0.952724	0.307191	0.0430154	51	0.79938	0.397635	0.0725979	30	CDP-diacylglycerol--glycerol-3-phosphate 3-phosphatidyltransferase-related protein
VC1936		1.0149	0.224784	0.0311719	52	1.02794	0.147281	0.0190139	60	0.970343	0.171538	0.0202159	73	1.00626	0.147305	0.0179961	67	0.939875	0.311334	0.0354798	77	1.03596	0.256106	0.0276166	86	phosphatidate cytidylyltransferase, putative
VC1937		1.02472	0.0958969	0.0209264	21	1.0382	0.209975	0.0447669	22	1.01515	0.0896563	0.0179313	25	0.9496	0.240951	0.0463711	27	1.01488	0.151169	0.0255522	35	0.942208	0.26499	0.0418986	40	hypothetical protein
VC1938		0.964148	0.209233	0.0480014	19	0.857875	0.352442	0.0719419	24	0.903514	0.328717	0.0644667	26	0.883611	0.343017	0.0686034	25	1.01748	0.271732	0.0532911	26	0.868095	0.36773	0.067138	30	hypothetical protein
VC1939		1.02351	0.190047	0.0286507	44	1.0167	0.202083	0.0275	54	0.958551	0.183656	0.0310436	35	0.942201	0.231558	0.0357301	42	0.983557	0.212472	0.0278989	58	0.977465	0.335087	0.0469215	51	hypothetical protein
VC1940		0.988638	0.245262	0.0433566	32	1.02531	0.127055	0.0198426	41	0.90299	0.378533	0.0639838	35	0.965977	0.297327	0.0482328	38	0.920031	0.318842	0.0450911	50	1.01488	0.149952	0.0228675	43	hypothetical protein
VC1941		1.0341	0.159523	0.0204248	61	1.01323	0.187425	0.0224015	70	0.989553	0.168758	0.0243581	49	1.01588	0.127985	0.0179215	51	0.93963	0.255128	0.0267447	91	1.03148	0.272117	0.032759	69	hypothetical protein
VC1942		0.218398	0.362442	0.120814	9	0.741619	0.32694	0.0943793	12	0.08054	0.211415	0.0668553	10	0	X	X	9	0.200005	0.308775	0.0976433	10	ND				methylenetetrahydrofolate dehydrogenase/methenyltetrahydrofolate cyclohydrolase
VC1943		1.06739	0.0948734	0.0387319	6	1.06188	0.140559	0.0468531	9	ND			4	0.561712	0.441365	0.180187	6	0.614579	0.469859	0.125575	14	ND			4	hypothetical protein
VC1944		0.952291	0.243726	0.0380636	41	0.995612	0.133329	0.0172127	60	1.00969	0.218426	0.0405606	29	1.0044	0.0876979	0.0144174	37	0.956412	0.302477	0.0354023	74	0.969009	0.310416	0.0452789	47	PvcB protein
VC1945		0.997448	0.179082	0.0175604	104	0.99586	0.183959	0.0163238	127	0.995144	0.16248	0.0151513	119	0.990603	0.141187	0.0130527	120	0.998022	0.233524	0.0176025	184	0.998824	0.278778	0.0229154	149	hypothetical protein
VC1946		0.988936	0.157258	0.0420289	14	1.00021	0.0806655	0.0201664	16	1.00187	0.116491	0.0274572	18	0.959577	0.147543	0.0380955	15	0.978317	0.344528	0.0689055	25	0.768268	0.428671	0.0983439	19	hypothetical protein
VC1947		0.999401	0.150252	0.0155804	93	1.00644	0.128501	0.0117305	120	1.03823	0.158263	0.015906	100	1.03134	0.137114	0.0131938	109	1.00416	0.145872	0.0113907	168	0.983088	0.229928	0.0199373	136	LysR family transcriptional regulator
VC1948		1.02875	0.0623925	0.0151324	17	1.03087	0.125902	0.0274741	21	0.94466	0.220935	0.0390561	32	1.00677	0.117041	0.0210212	31	0.995744	0.221591	0.0369319	36	0.967997	0.311621	0.0492717	40	hypothetical protein
VC1949		1.00324	0.157073	0.0112482	197	0.99302	0.170688	0.0107738	251	0.97843	0.237479	0.0174128	191	0.984211	0.187706	0.0130781	209	0.997431	0.211669	0.0122004	312	0.97618	0.282356	0.018226	247	pvcA protein
VC1950		0.984827	0.209547	0.0177735	140	0.97454	0.193145	0.0149015	168	1.0057	0.136236	0.0109428	158	0.992054	0.132476	0.0104731	163	0.978853	0.233977	0.0160318	220	0.967673	0.287759	0.0206599	201	biotin sulfoxide reductase
VC1951		0.983661	0.172089	0.0208689	68	0.982966	0.280338	0.0311487	81	0.977033	0.179325	0.0193372	86	0.996193	0.153715	0.0164799	88	0.994918	0.21842	0.0231524	89	0.972338	0.280812	0.0265343	115	cytochrome c-type protein YecK
VC1952		1.02138	0.165981	0.0133752	155	1.00105	0.138257	0.00965632	206	0.972806	0.17585	0.015666	130	0.981371	0.149829	0.0121528	154	0.975528	0.233602	0.0150789	252	0.993769	0.281736	0.0218014	172	chitinase
VC1953		0.954715	0.234249	0.0257122	83	1.00043	0.102629	0.00996824	106	0.992243	0.258233	0.0354711	54	1.0236	0.135191	0.0168988	64	0.945041	0.275959	0.0258459	119	0.900749	0.35022	0.0377652	86	NupC family protein
VC1954		ND				ND				ND				ND				ND				ND				hypothetical protein	Essential
VC1955		0.978703	0.214825	0.0279679	59	1.01609	0.145625	0.0161806	81	1.00606	0.149681	0.0175188	74	0.972668	0.193443	0.0216276	81	0.987031	0.259525	0.0250892	110	0.959081	0.272157	0.0269475	102	LysR family transcriptional regulator
VC1956		1.00263	0.181886	0.0268176	46	1.01731	0.117658	0.0148235	63	1.01329	0.116812	0.0149562	61	0.98248	0.176226	0.0220282	64	0.968285	0.271363	0.0286042	91	0.915199	0.319022	0.03523	83	lytic murein transglycosylase, putative
VC1957		1.01164	0.133365	0.026673	25	0.980584	0.188497	0.035003	29	0.85218	0.349982	0.0729764	23	0.830489	0.335356	0.0657687	26	0.83126	0.410427	0.0657209	39	0.9205	0.323811	0.0675193	23	hypothetical protein
VC1958		1.04267	0.128891	0.0322226	16	1.04763	0.100412	0.0224528	20	1.04493	0.185612	0.0415042	20	1.01173	0.253851	0.0582374	19	0.857631	0.324379	0.0613019	28	0.894969	0.337959	0.0819671	17	hypothetical protein
VC1959	minC	1.03661	0.107696	0.0190382	32	1.01822	0.155711	0.0234743	44	1.03979	0.222655	0.038185	34	0.959883	0.248629	0.0398126	39	0.877742	0.357642	0.0469608	58	0.865446	0.37185	0.0587946	40	septum formation inhibitor
VC1960		0.982841	0.219721	0.0281324	61	1.02357	0.141654	0.0158374	80	0.943198	0.289719	0.0413884	50	0.902866	0.327767	0.0419662	61	0.839619	0.363289	0.0372727	97	0.880218	0.373006	0.0442677	71	septum site-determining protein MinD
VC1961	minE	0.54896	0.497668	0.157376	10	0.584974	0.525115	0.158328	11	0.557213	0.421211	0.121593	12	0.307402	0.402725	0.111696	13	0.724451	0.409727	0.136576	9	ND			4	cell division topological specificity factor MinE
VC1962		0.976369	0.171336	0.0307729	31	0.982767	0.178397	0.0275272	42	0.945508	0.223094	0.0366764	37	0.9559	0.254488	0.0407507	39	0.984451	0.294574	0.039364	56	0.975159	0.286337	0.0464501	38	lipoprotein
VC1963		1.09542	0.148748	0.034125	19	1.04636	0.0826608	0.0162111	26	1.05211	0.145882	0.0353815	17	1.01918	0.142472	0.0297076	23	0.963346	0.161502	0.0285498	32	0.886132	0.360564	0.0707125	26	hypothetical protein
VC1964		1.06468	0.207549	0.0309395	45	1.03794	0.136185	0.0163947	69	0.981742	0.196138	0.0306317	42	0.992343	0.165762	0.0223514	55	1.04234	0.151481	0.0167283	82	1.04863	0.216094	0.0268032	65	hypothetical protein
VC1965		1.01938	0.0855633	0.0186714	21	0.996867	0.0738059	0.0124755	35	0.978353	0.112042	0.0201234	31	0.907669	0.295825	0.0486333	37	0.754153	0.40383	0.0565476	51	0.842526	0.366569	0.0594654	38	hypothetical protein
VC1966		1.00458	0.200677	0.0228693	77	0.997525	0.153481	0.0155837	97	0.893428	0.270328	0.032082	73	0.835157	0.341512	0.0381822	81	0.958827	0.26472	0.0234901	131	0.871077	0.353639	0.0403009	77	hypothetical protein
VC1967		1.01038	0.157414	0.0159012	98	1.00261	0.160821	0.0146201	121	1.03029	0.163829	0.0163829	101	1.00548	0.169763	0.0160411	112	0.978095	0.241463	0.0195211	157	0.925519	0.312355	0.0276086	130	methyl-accepting chemotaxis protein
VC1968		0.994976	0.221679	0.0434748	26	0.997159	0.220126	0.0416	28	0.980659	0.140208	0.027497	26	0.979032	0.23979	0.047958	25	0.943854	0.313196	0.0571815	30	0.964852	0.204803	0.0362043	32	transcriptional regulator
VC1969		ND				ND				ND				ND				ND				ND				hypothetical protein	Essential
VC1970		1.00525	0.183702	0.021355	74	0.986136	0.175063	0.017961	95	0.931618	0.290628	0.0363284	65	0.920355	0.27854	0.0319507	76	0.995702	0.260027	0.0251377	109	0.913962	0.420952	0.0473608	80	benzoate transport protein
VC1971		0.970606	0.263237	0.0310228	72	0.984456	0.205098	0.0209327	96	0.973255	0.215114	0.0268892	65	0.945029	0.23216	0.0271723	73	0.9611	0.235136	0.0217383	120	0.897229	0.357202	0.0380779	89	O-succinylbenzoic acid--CoA ligase
VC1972		0.962115	0.244176	0.0345317	50	1.0256	0.148923	0.0184716	65	0.920641	0.232986	0.038831	37	0.821082	0.322915	0.0476112	46	0.940002	0.270552	0.0302486	80	0.881178	0.39364	0.0586804	45	O-succinylbenzoate synthase
VC1973		0.935154	0.257797	0.0429662	36	0.981642	0.25354	0.0400882	40	0.942429	0.206035	0.0300533	47	0.95185	0.172693	0.0249261	48	0.857495	0.319828	0.0412896	60	0.917215	0.274384	0.0360284	58	naphthoate synthase
VC1974		0.973498	0.193054	0.0331085	34	1.03601	0.102284	0.0147634	48	0.914189	0.255367	0.0491454	27	0.915305	0.219728	0.0366213	36	0.956903	0.247363	0.0336619	54	0.911564	0.364224	0.0555436	43	acyl-CoA thioester hydrolase YfbB
VC1975		0.979313	0.2556	0.0242605	111	1.02347	0.160433	0.0133232	145	0.959006	0.199673	0.0192136	109	0.969153	0.173367	0.0154448	126	0.9805	0.217095	0.0160044	186	0.910236	0.365338	0.0290647	159	2-succinyl-6-hydroxy-2, 4-cyclohexadiene-1-carboxylic acid synthase/2-oxoglutarate decarboxylase
VC1976		0.977489	0.216361	0.0225572	92	0.979439	0.19171	0.0168141	130	0.886676	0.311009	0.0374411	71	0.946329	0.226721	0.0238985	91	0.935683	0.309053	0.0248238	162	0.919081	0.34957	0.0358651	95	menaquinone-specific isochorismate synthase
VC1977		1.01576	0.146151	0.0139988	109	1.00847	0.161465	0.0133174	147	0.966792	0.128832	0.0116639	126	0.951232	0.203325	0.0174994	137	0.989575	0.216508	0.0157072	195	0.9833	0.278634	0.0229814	152	aminotransferase AlaT
VC1978		0.911695	0.268576	0.0404894	44	0.97483	0.161953	0.0229036	50	1.01424	0.169971	0.0221283	59	1.00078	0.148341	0.0196483	57	1.04075	0.1335	0.0164327	66	0.944127	0.339322	0.0414547	68	hypothetical protein
VC1979		0.986939	0.200368	0.0193703	107	0.991153	0.196277	0.0168306	136	0.992696	0.187911	0.0177559	115	0.992956	0.163346	0.0146101	126	0.979916	0.235148	0.0179823	175	0.940609	0.322034	0.0275132	139	deoxyguanosinetriphosphate triphosphohydrolase-like protein
VC1980		0.938229	0.283941	0.0466796	37	0.983063	0.180919	0.0289702	39	0.93585	0.296756	0.0469213	40	0.885011	0.28957	0.0469745	38	0.885194	0.352643	0.0489027	52	0.889981	0.304357	0.0386534	62	hypothetical protein
VC1981		ND				ND				ND				ND				ND				ND				hypothetical protein	Essential
VC1982		1.04232	0.106226	0.0283902	14	1.00993	0.0746819	0.0162969	21	0.905622	0.331513	0.110504	9	1.02171	0.066537	0.0177828	14	0.91366	0.222113	0.0463137	23	1.0278	0.301213	0.0805025	14	hypothetical protein
VC1983		0.987574	0.180865	0.0170144	113	1.0083	0.186439	0.0161663	133	0.973667	0.202738	0.0177813	132	1.00146	0.115871	0.00993588	139	0.986087	0.250881	0.0186995	182	0.981873	0.271122	0.0213674	165	peptidase, putative
VC1984		0.947343	0.316349	0.042274	56	1.01144	0.165901	0.0186653	79	0.992206	0.216646	0.0356163	38	0.945459	0.25404	0.0374561	46	0.787733	0.371849	0.0396392	91	0.891171	0.2942	0.0396699	55	ribonuclease D
VC1985		1.01924	0.169595	0.0154177	122	1.00811	0.148189	0.011679	162	0.830906	0.350278	0.0355654	99	0.822542	0.353575	0.0321432	124	0.918369	0.236082	0.0174517	187	0.786072	0.391465	0.0355878	121	long-chain-fatty-acid--CoA ligase
VC1986		0.959202	0.225278	0.0288439	61	0.968266	0.277813	0.0339403	67	0.996423	0.10337	0.0118574	77	0.955785	0.220617	0.0251417	78	0.933973	0.318832	0.0341823	87	0.999255	0.206754	0.0211017	97	hypothetical protein
VC1987		1.04486	0.0871681	0.0156559	31	1.06279	0.122921	0.0217295	32	0.939518	0.292021	0.0425956	47	0.975433	0.167833	0.0253017	44	1.02687	0.233058	0.0323193	52	1.00227	0.256718	0.036674	49	outer membrane lipoprotein Slp, putative
VC1988		0.999969	0.0337029	0.0127385	7	0.974744	0.079823	0.0325876	6	1.04668	0.0464542	0.0146901	10	1.01717	0.147507	0.0557523	7	0.821367	0.371416	0.140382	7	0.966527	0.127716	0.0354221	13	hypothetical protein
[truncated: 1,913 more rows]
